# Supplementary material for: Characterization of Host-Specific Genes from Pine- and Grass-Associated Species of the <em>Fusarium Fujikuroi </em>Species Complex
Source: Preprints.org preprint supplement (doi:10.20944/preprints202207.0007.v1), 2022-07-01

**Figure S7.** Host-range-associated genes with ancestral origins outside *Fusarium* but in the Ascomycetes. Host-range-associated genes investigated are highlighted in yellow; FCIR = *Fusarium circinatum* and FTEMP = *Fusarium temperatum*.

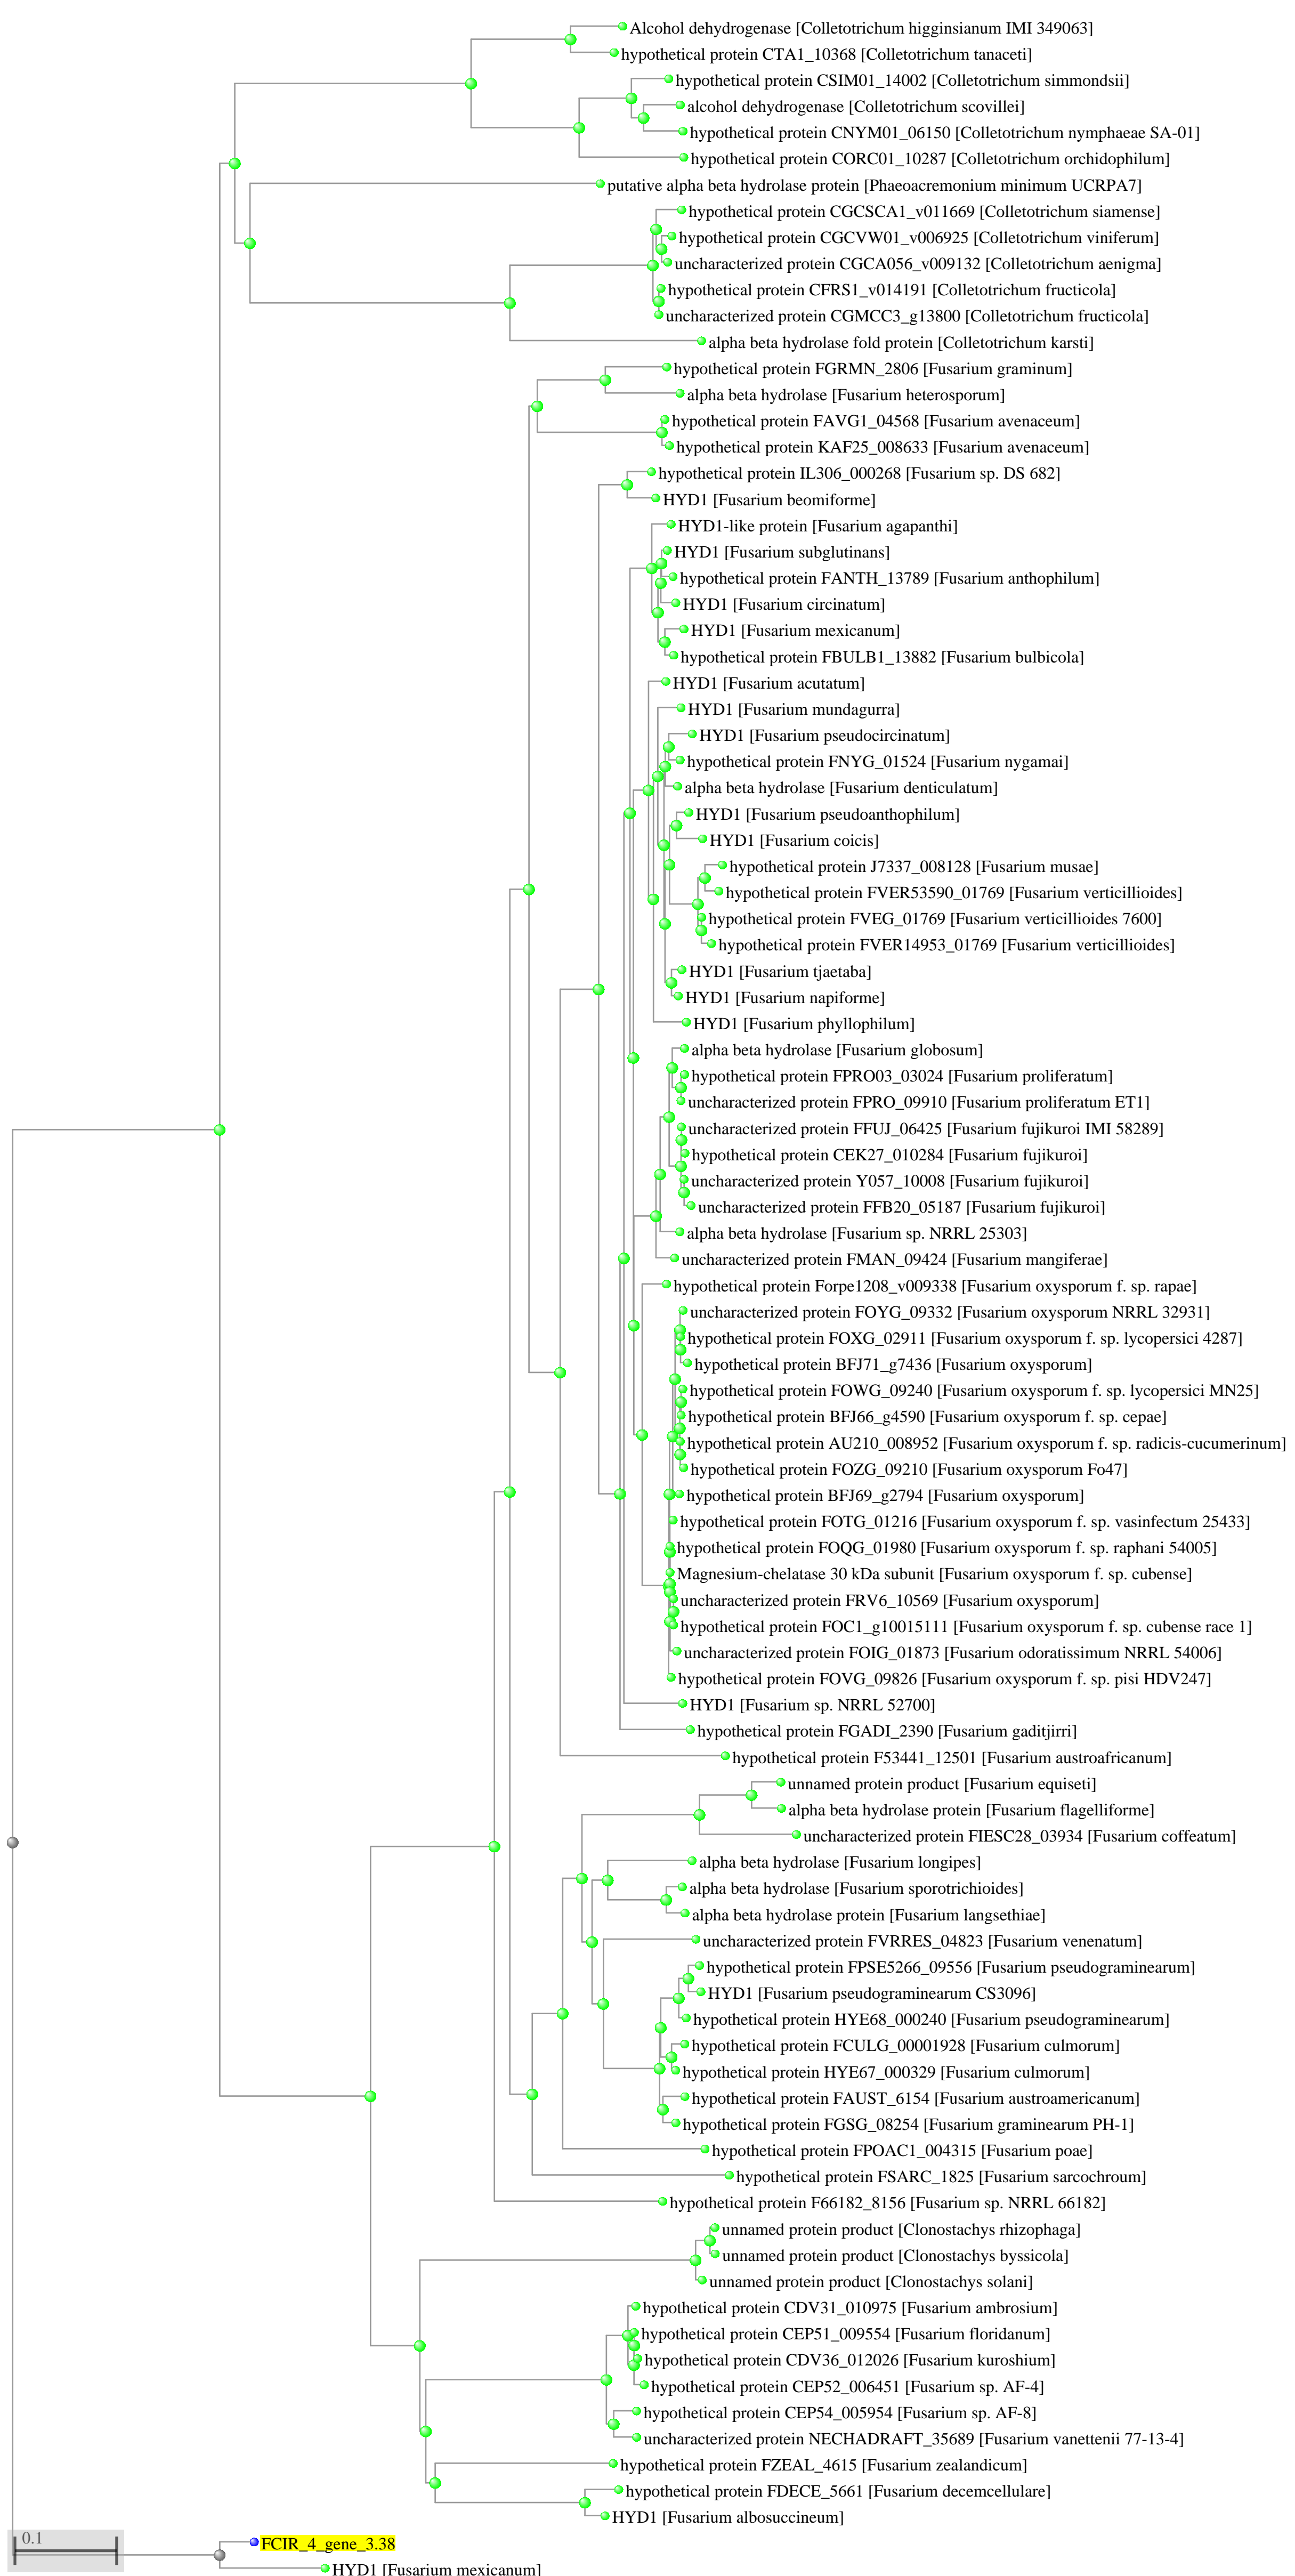

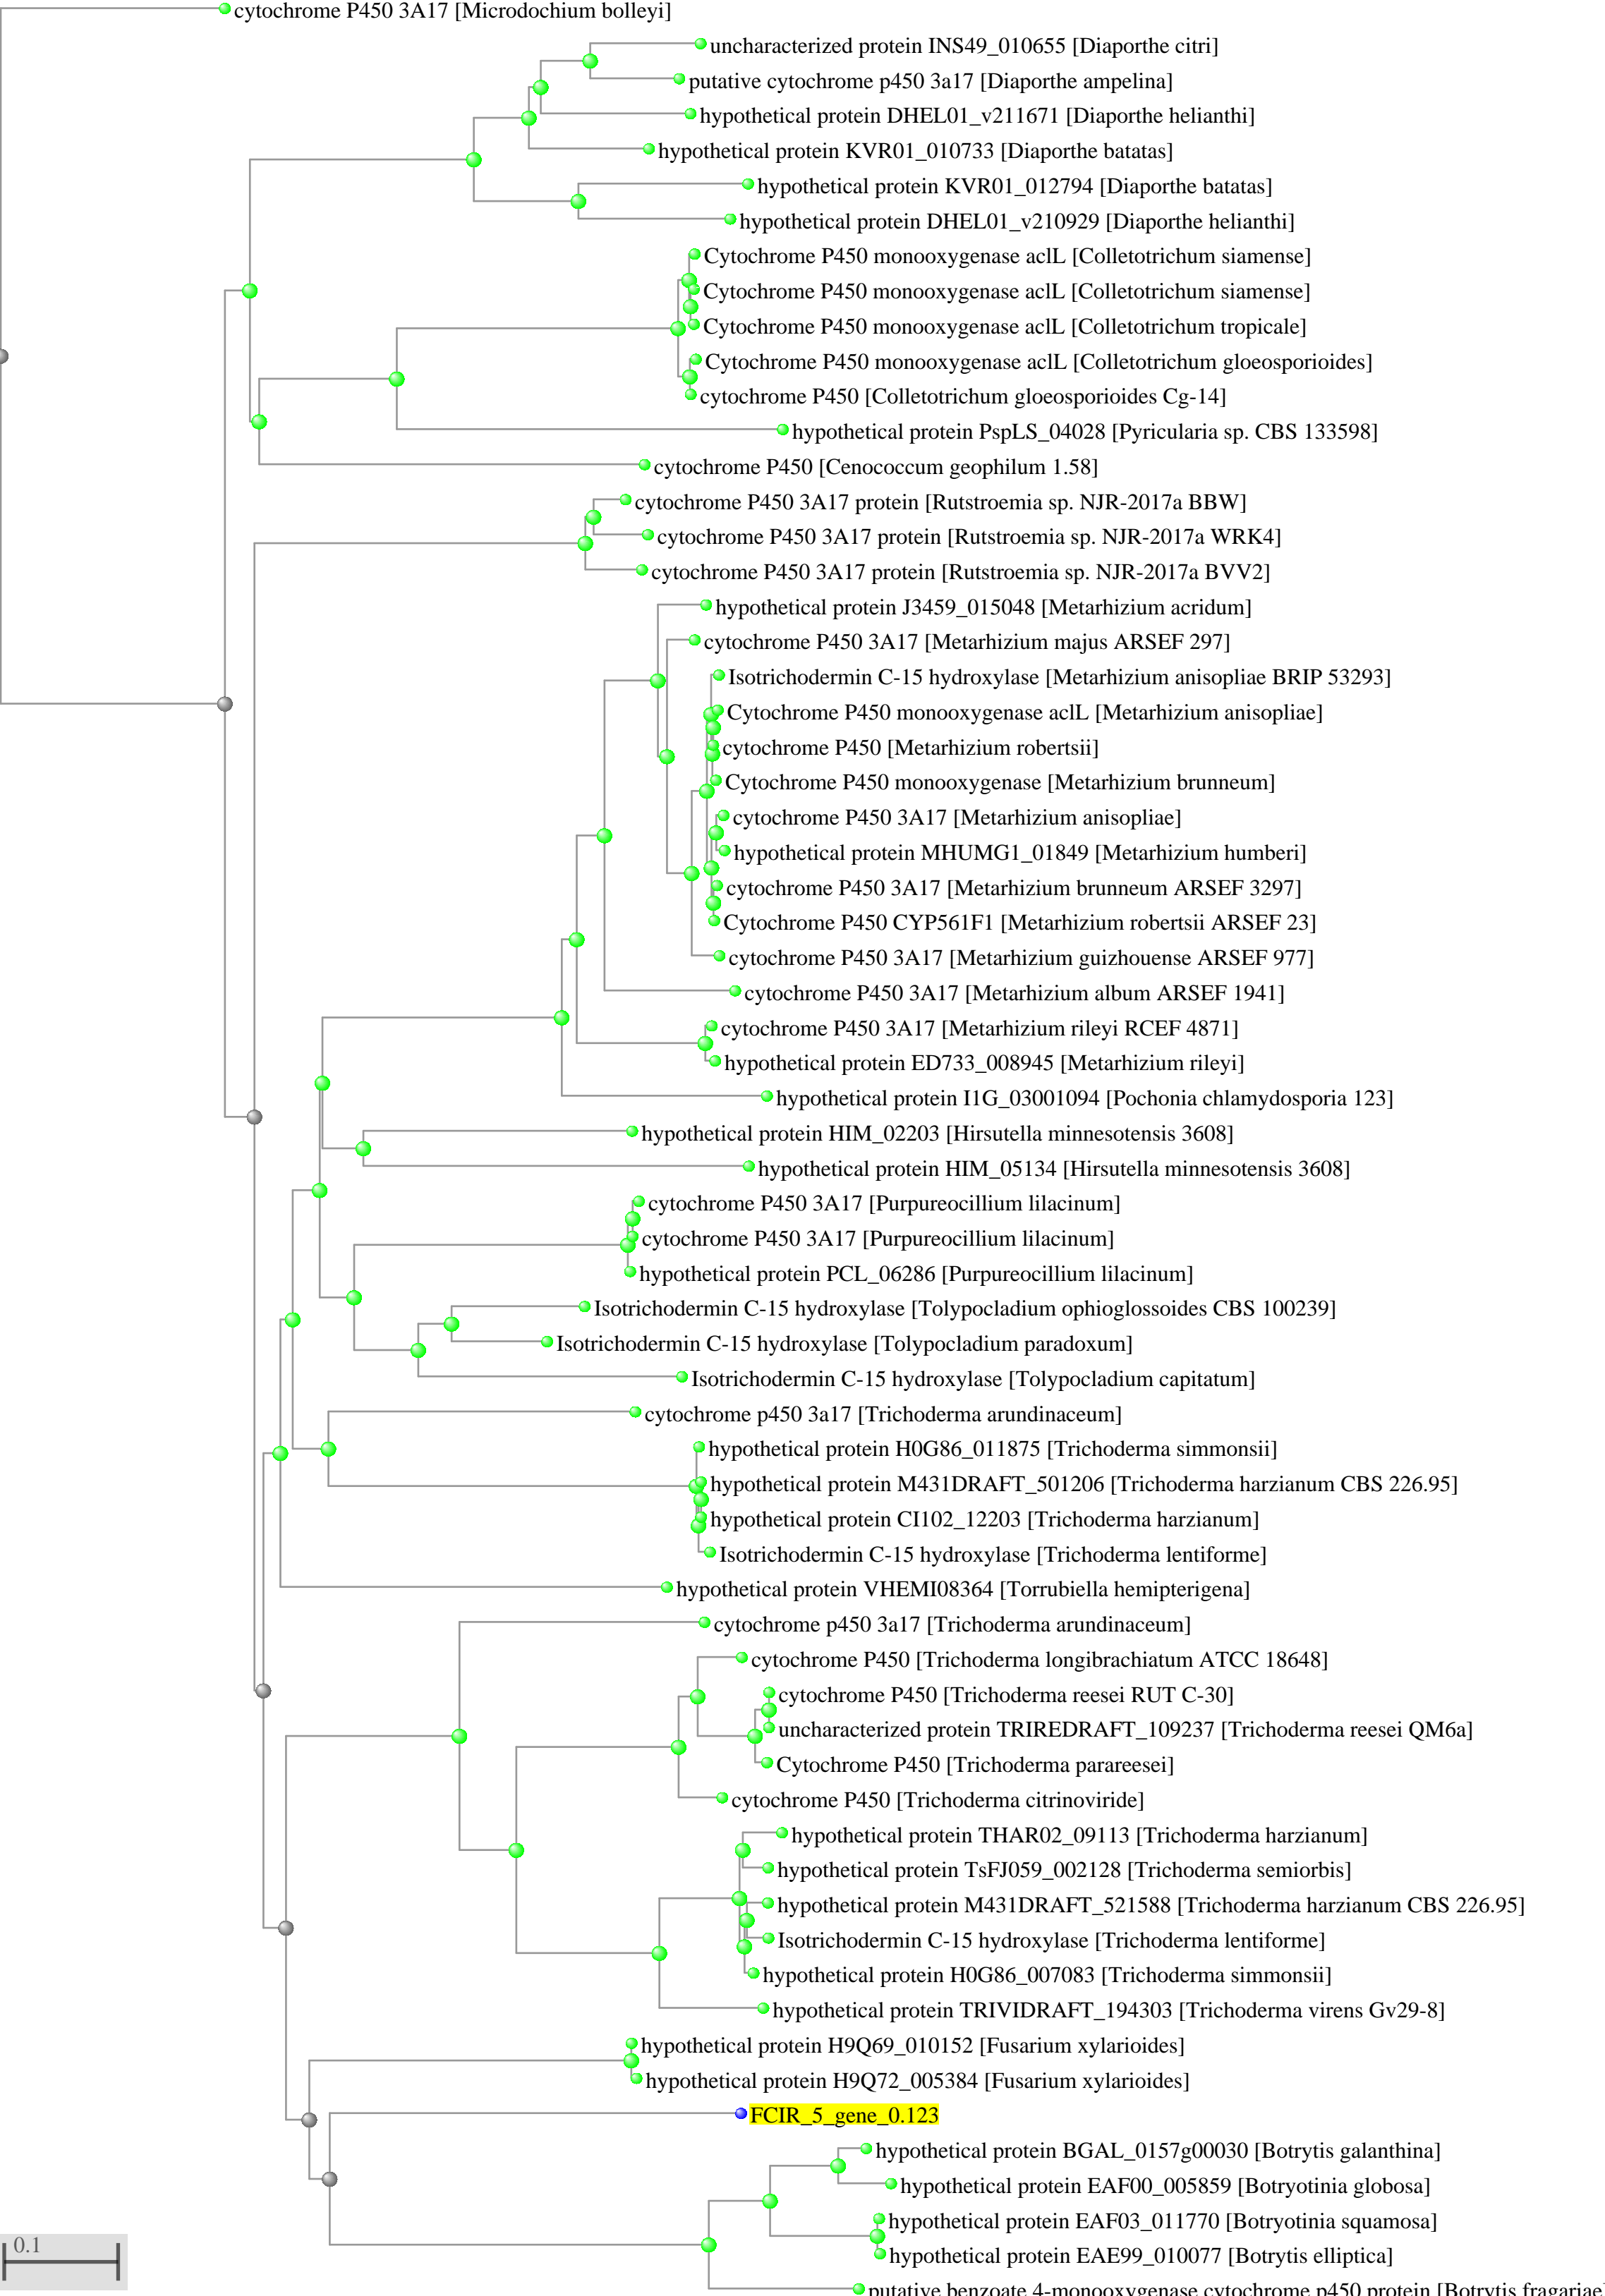

0.1

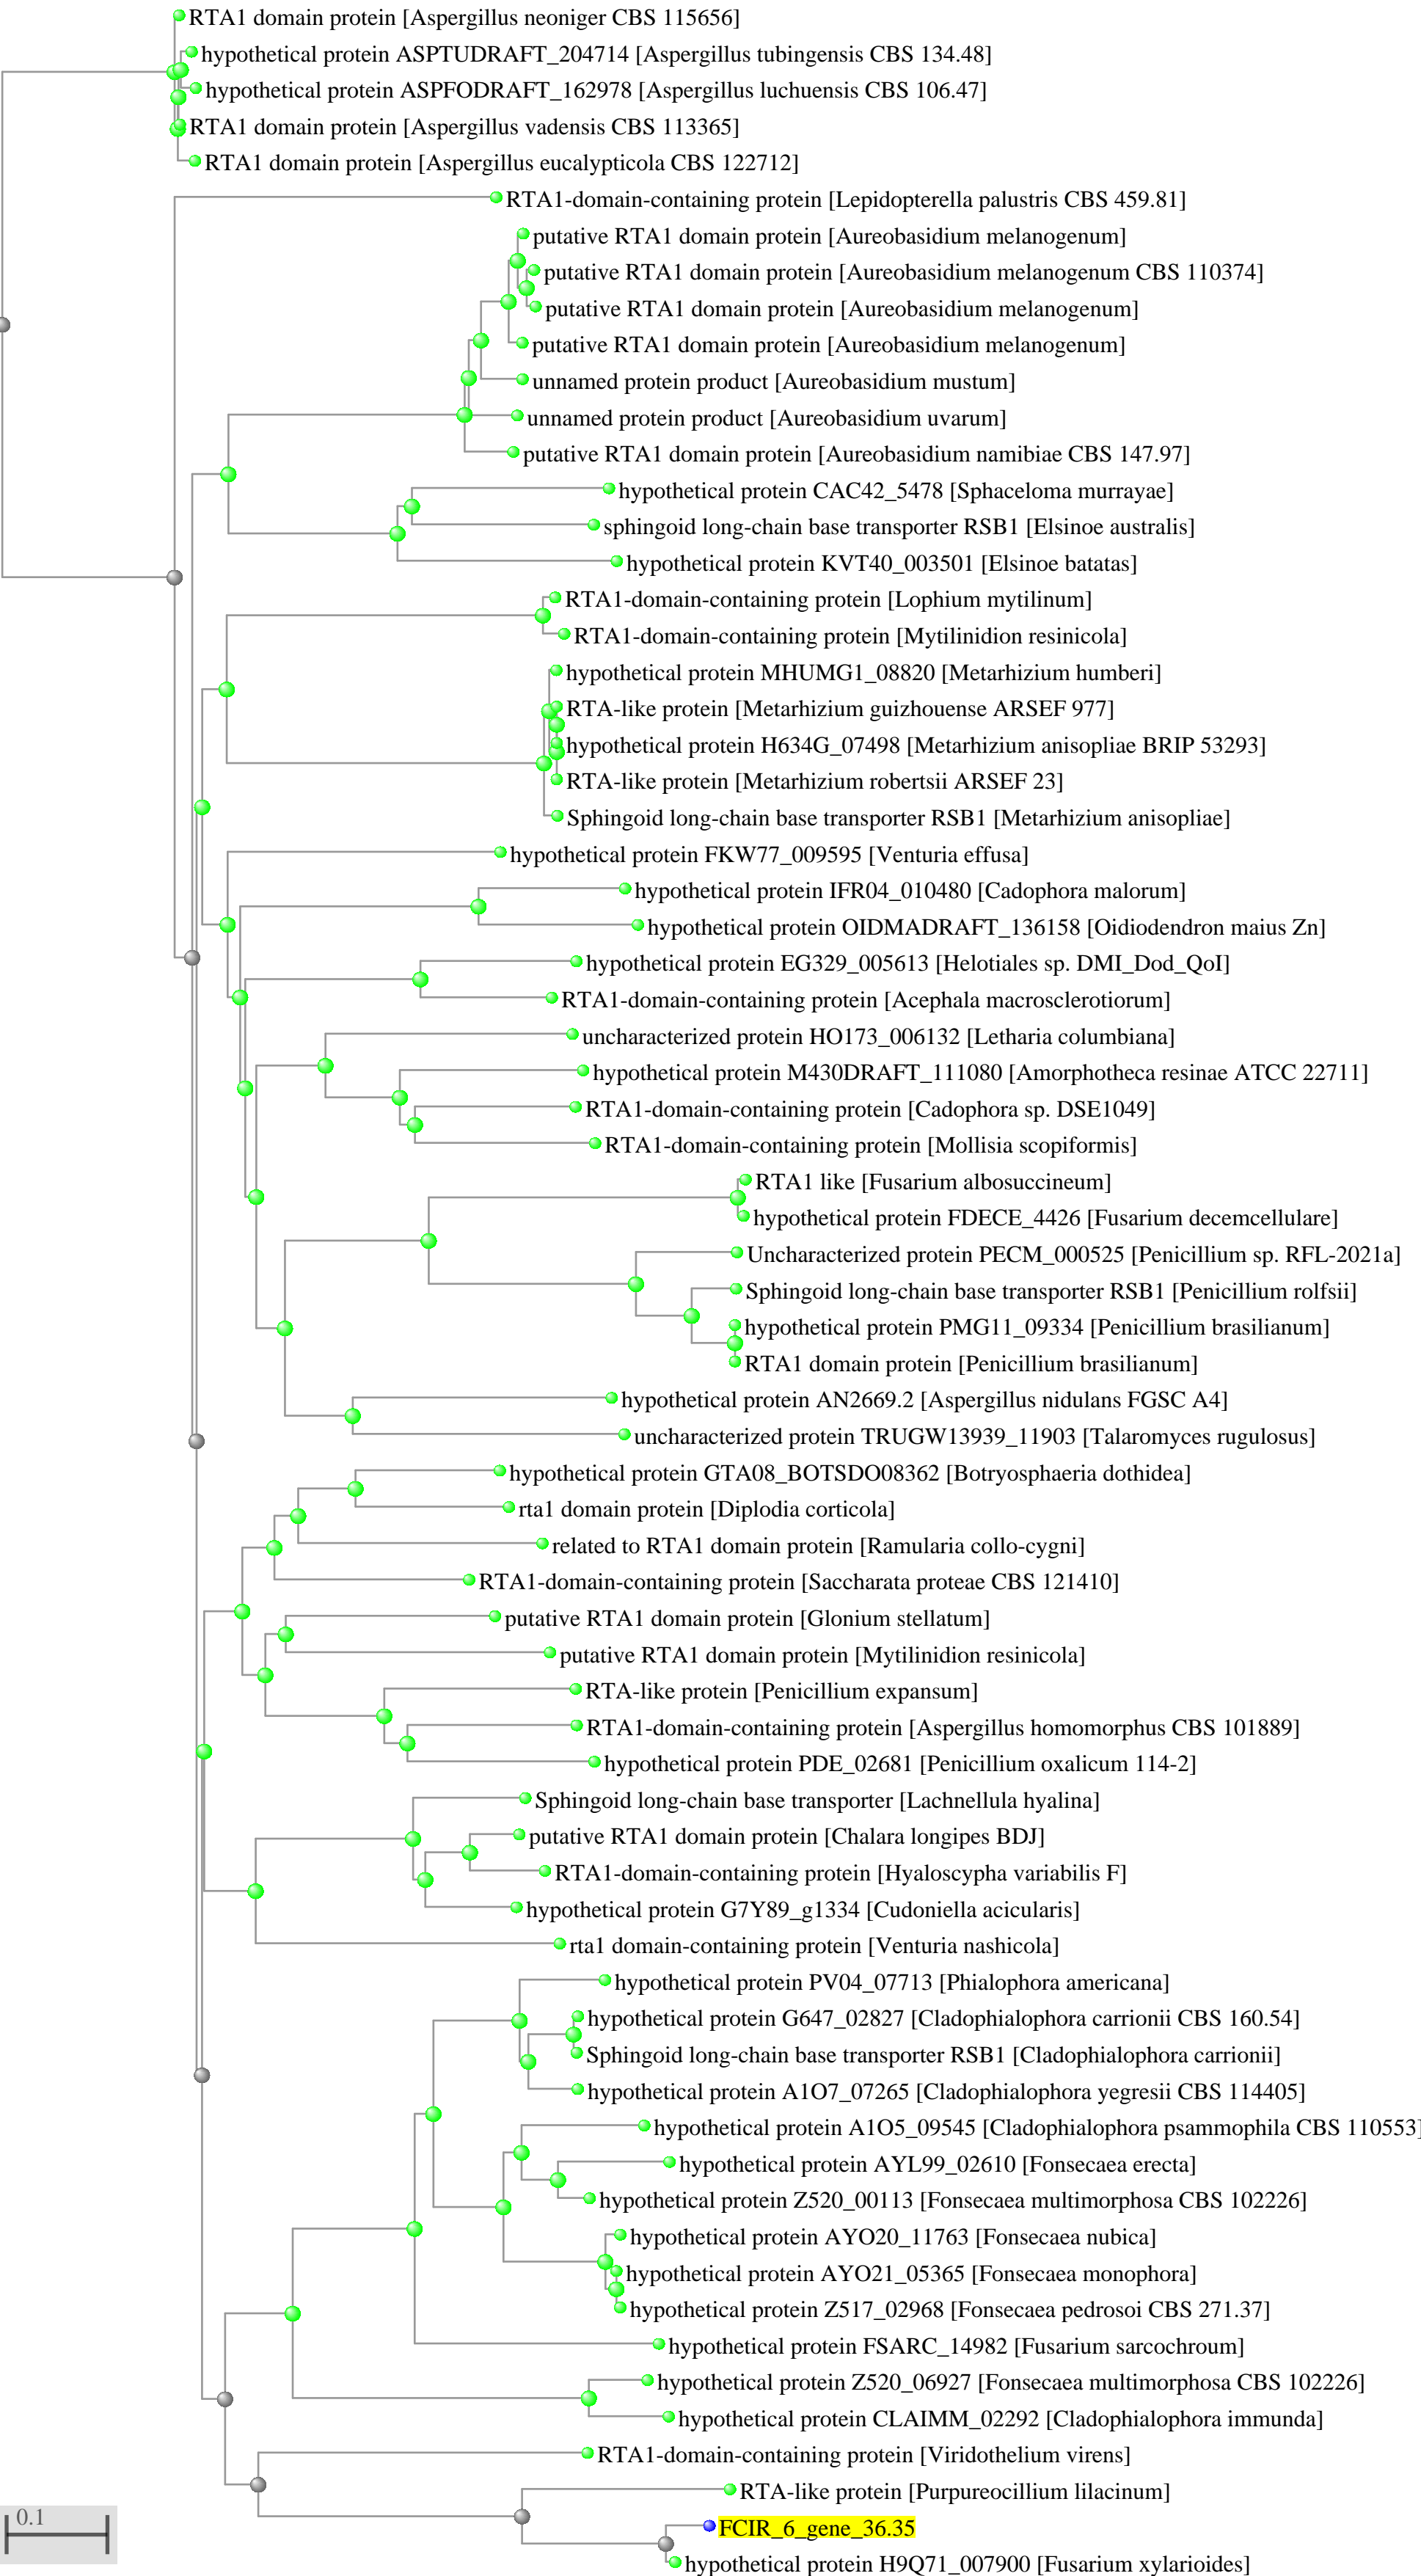



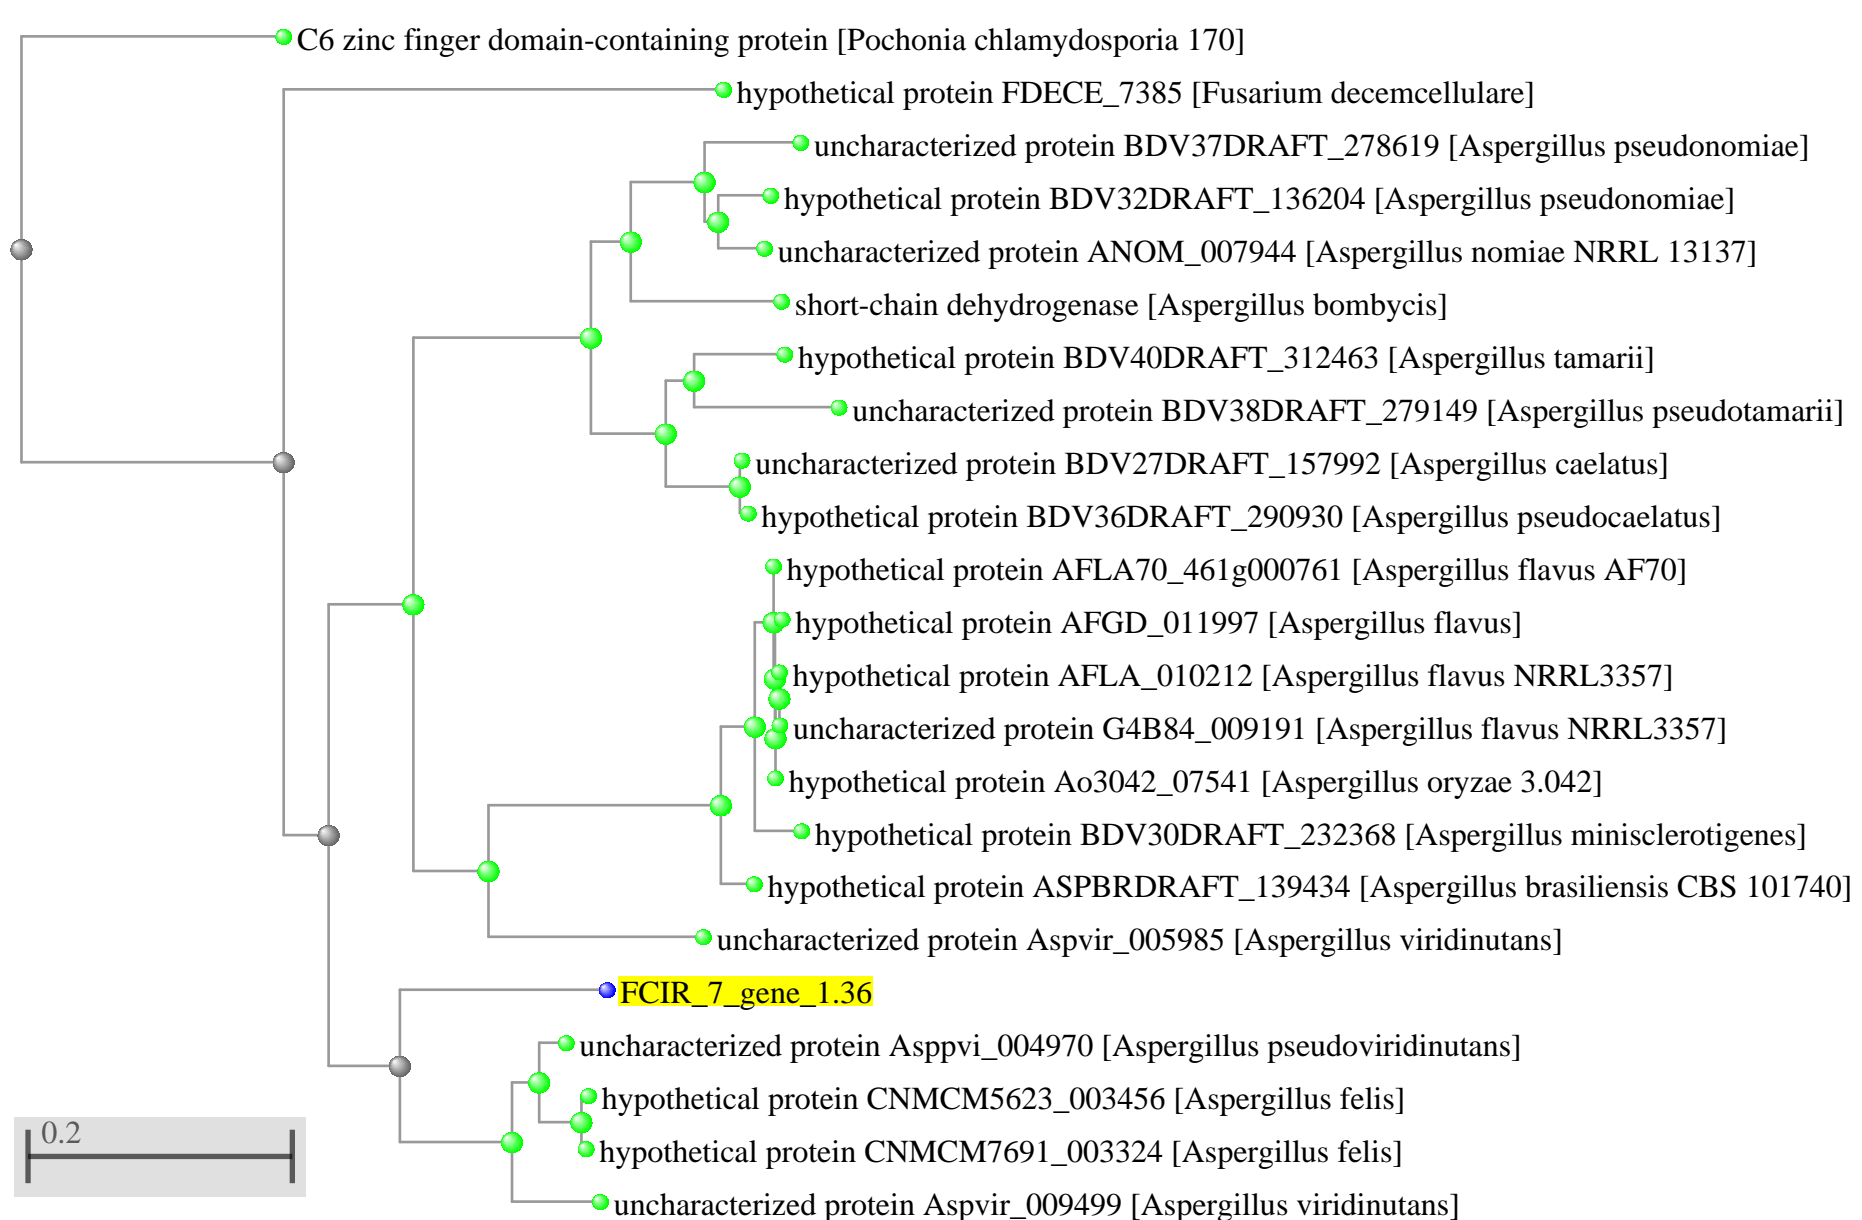

FCIR\_8\_gene\_1.117

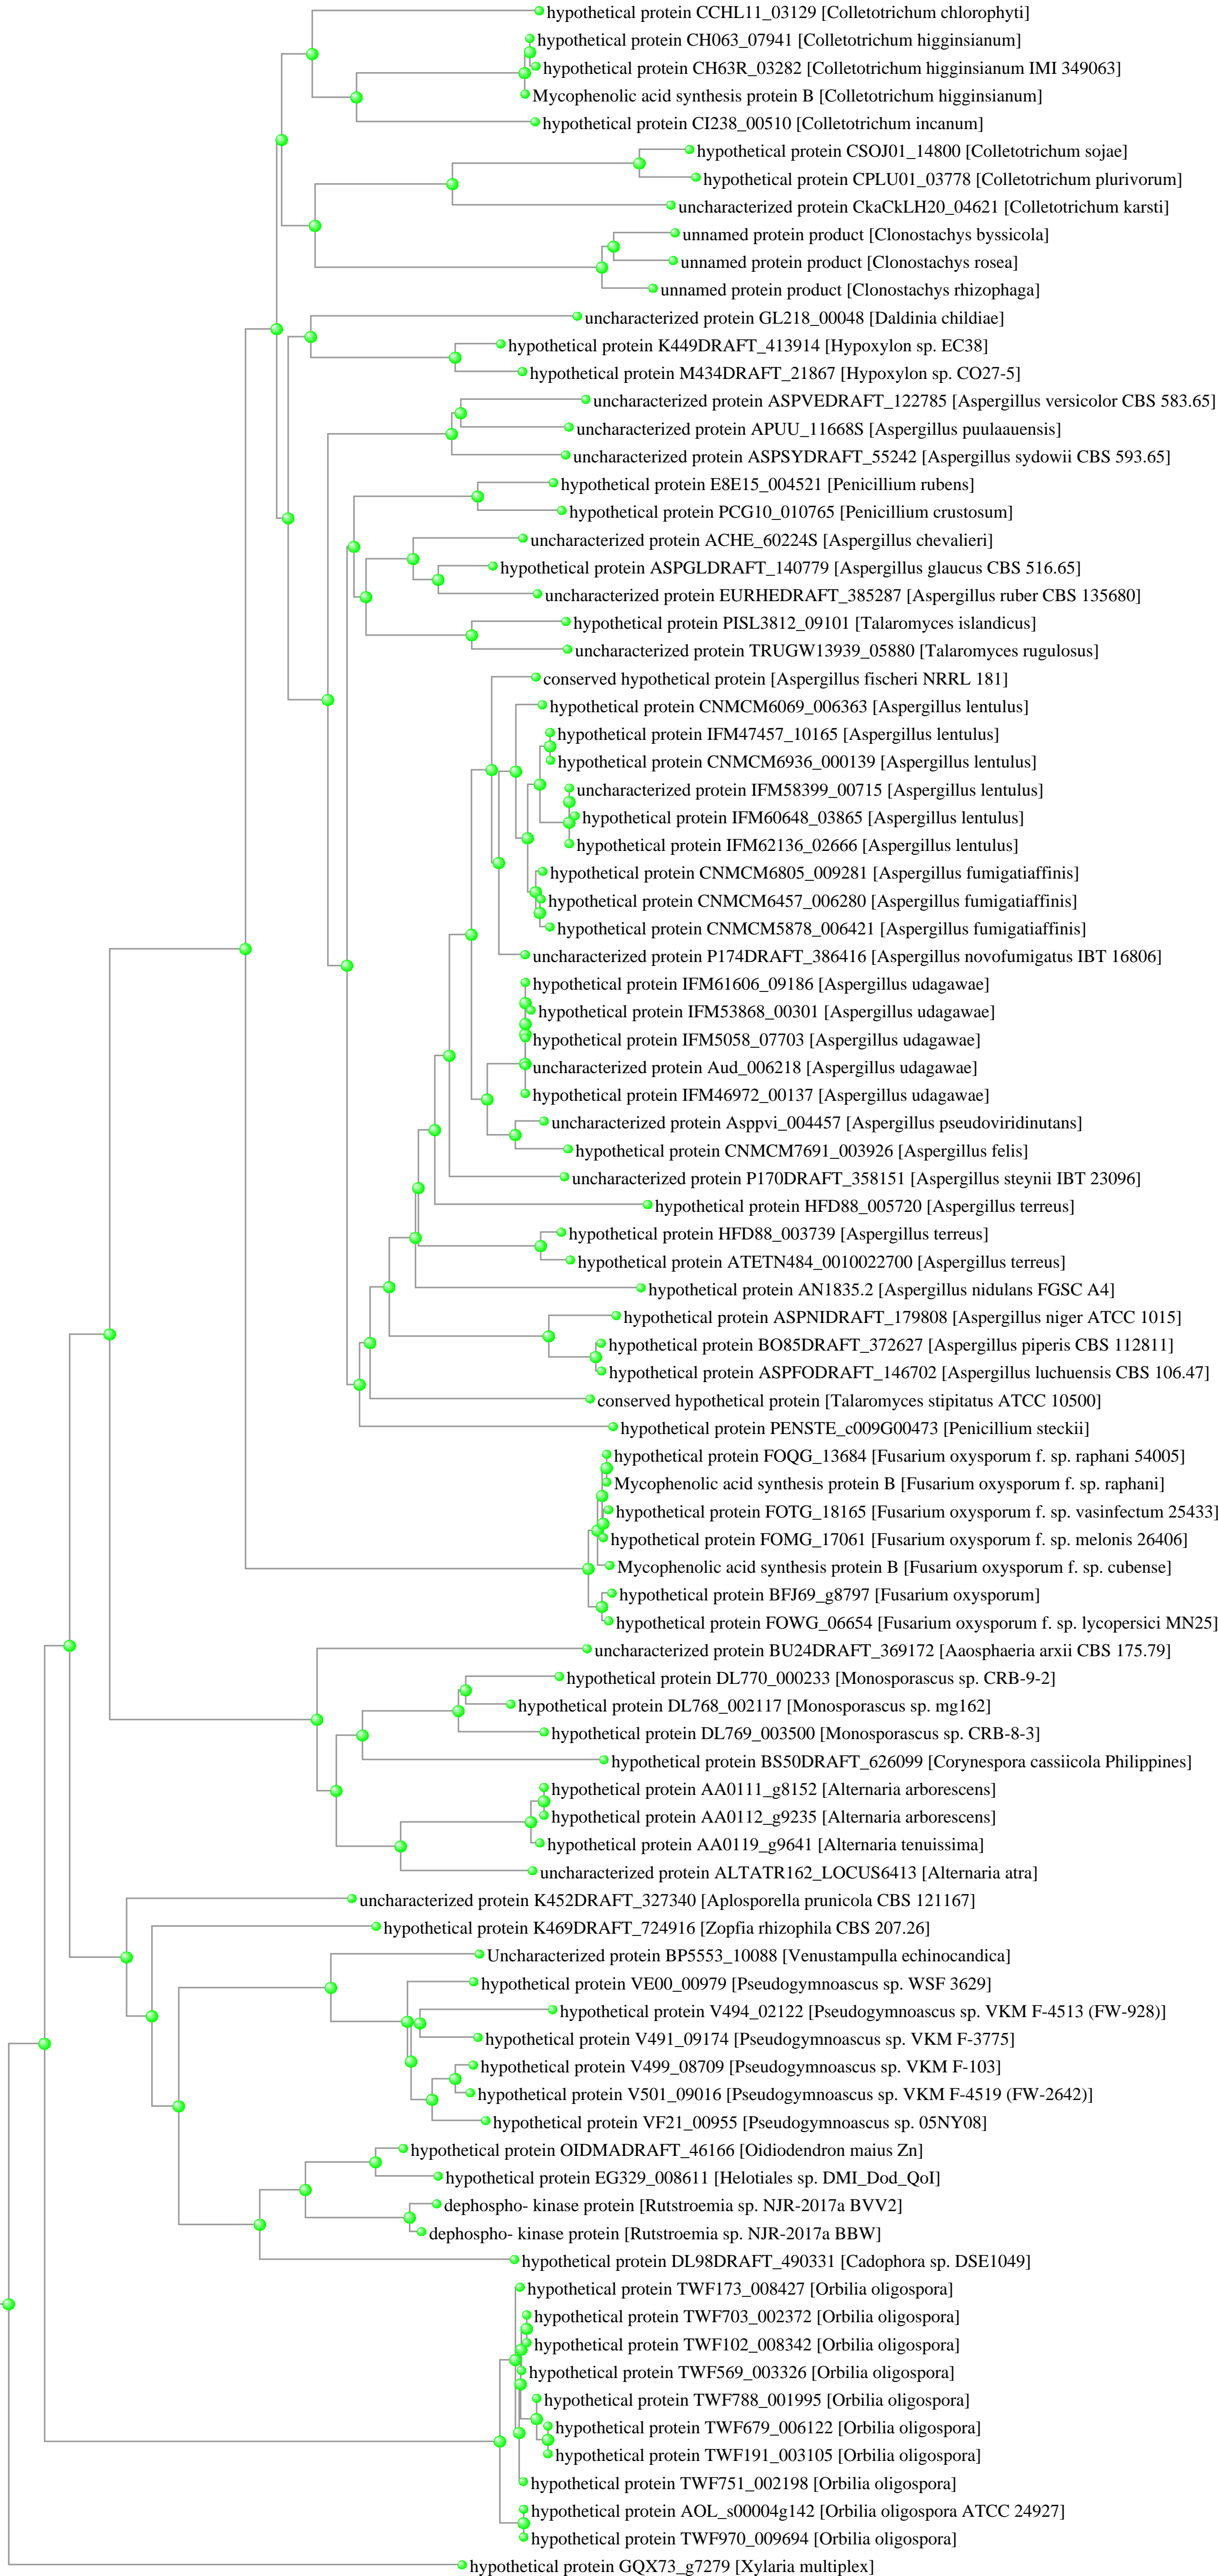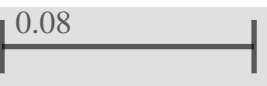

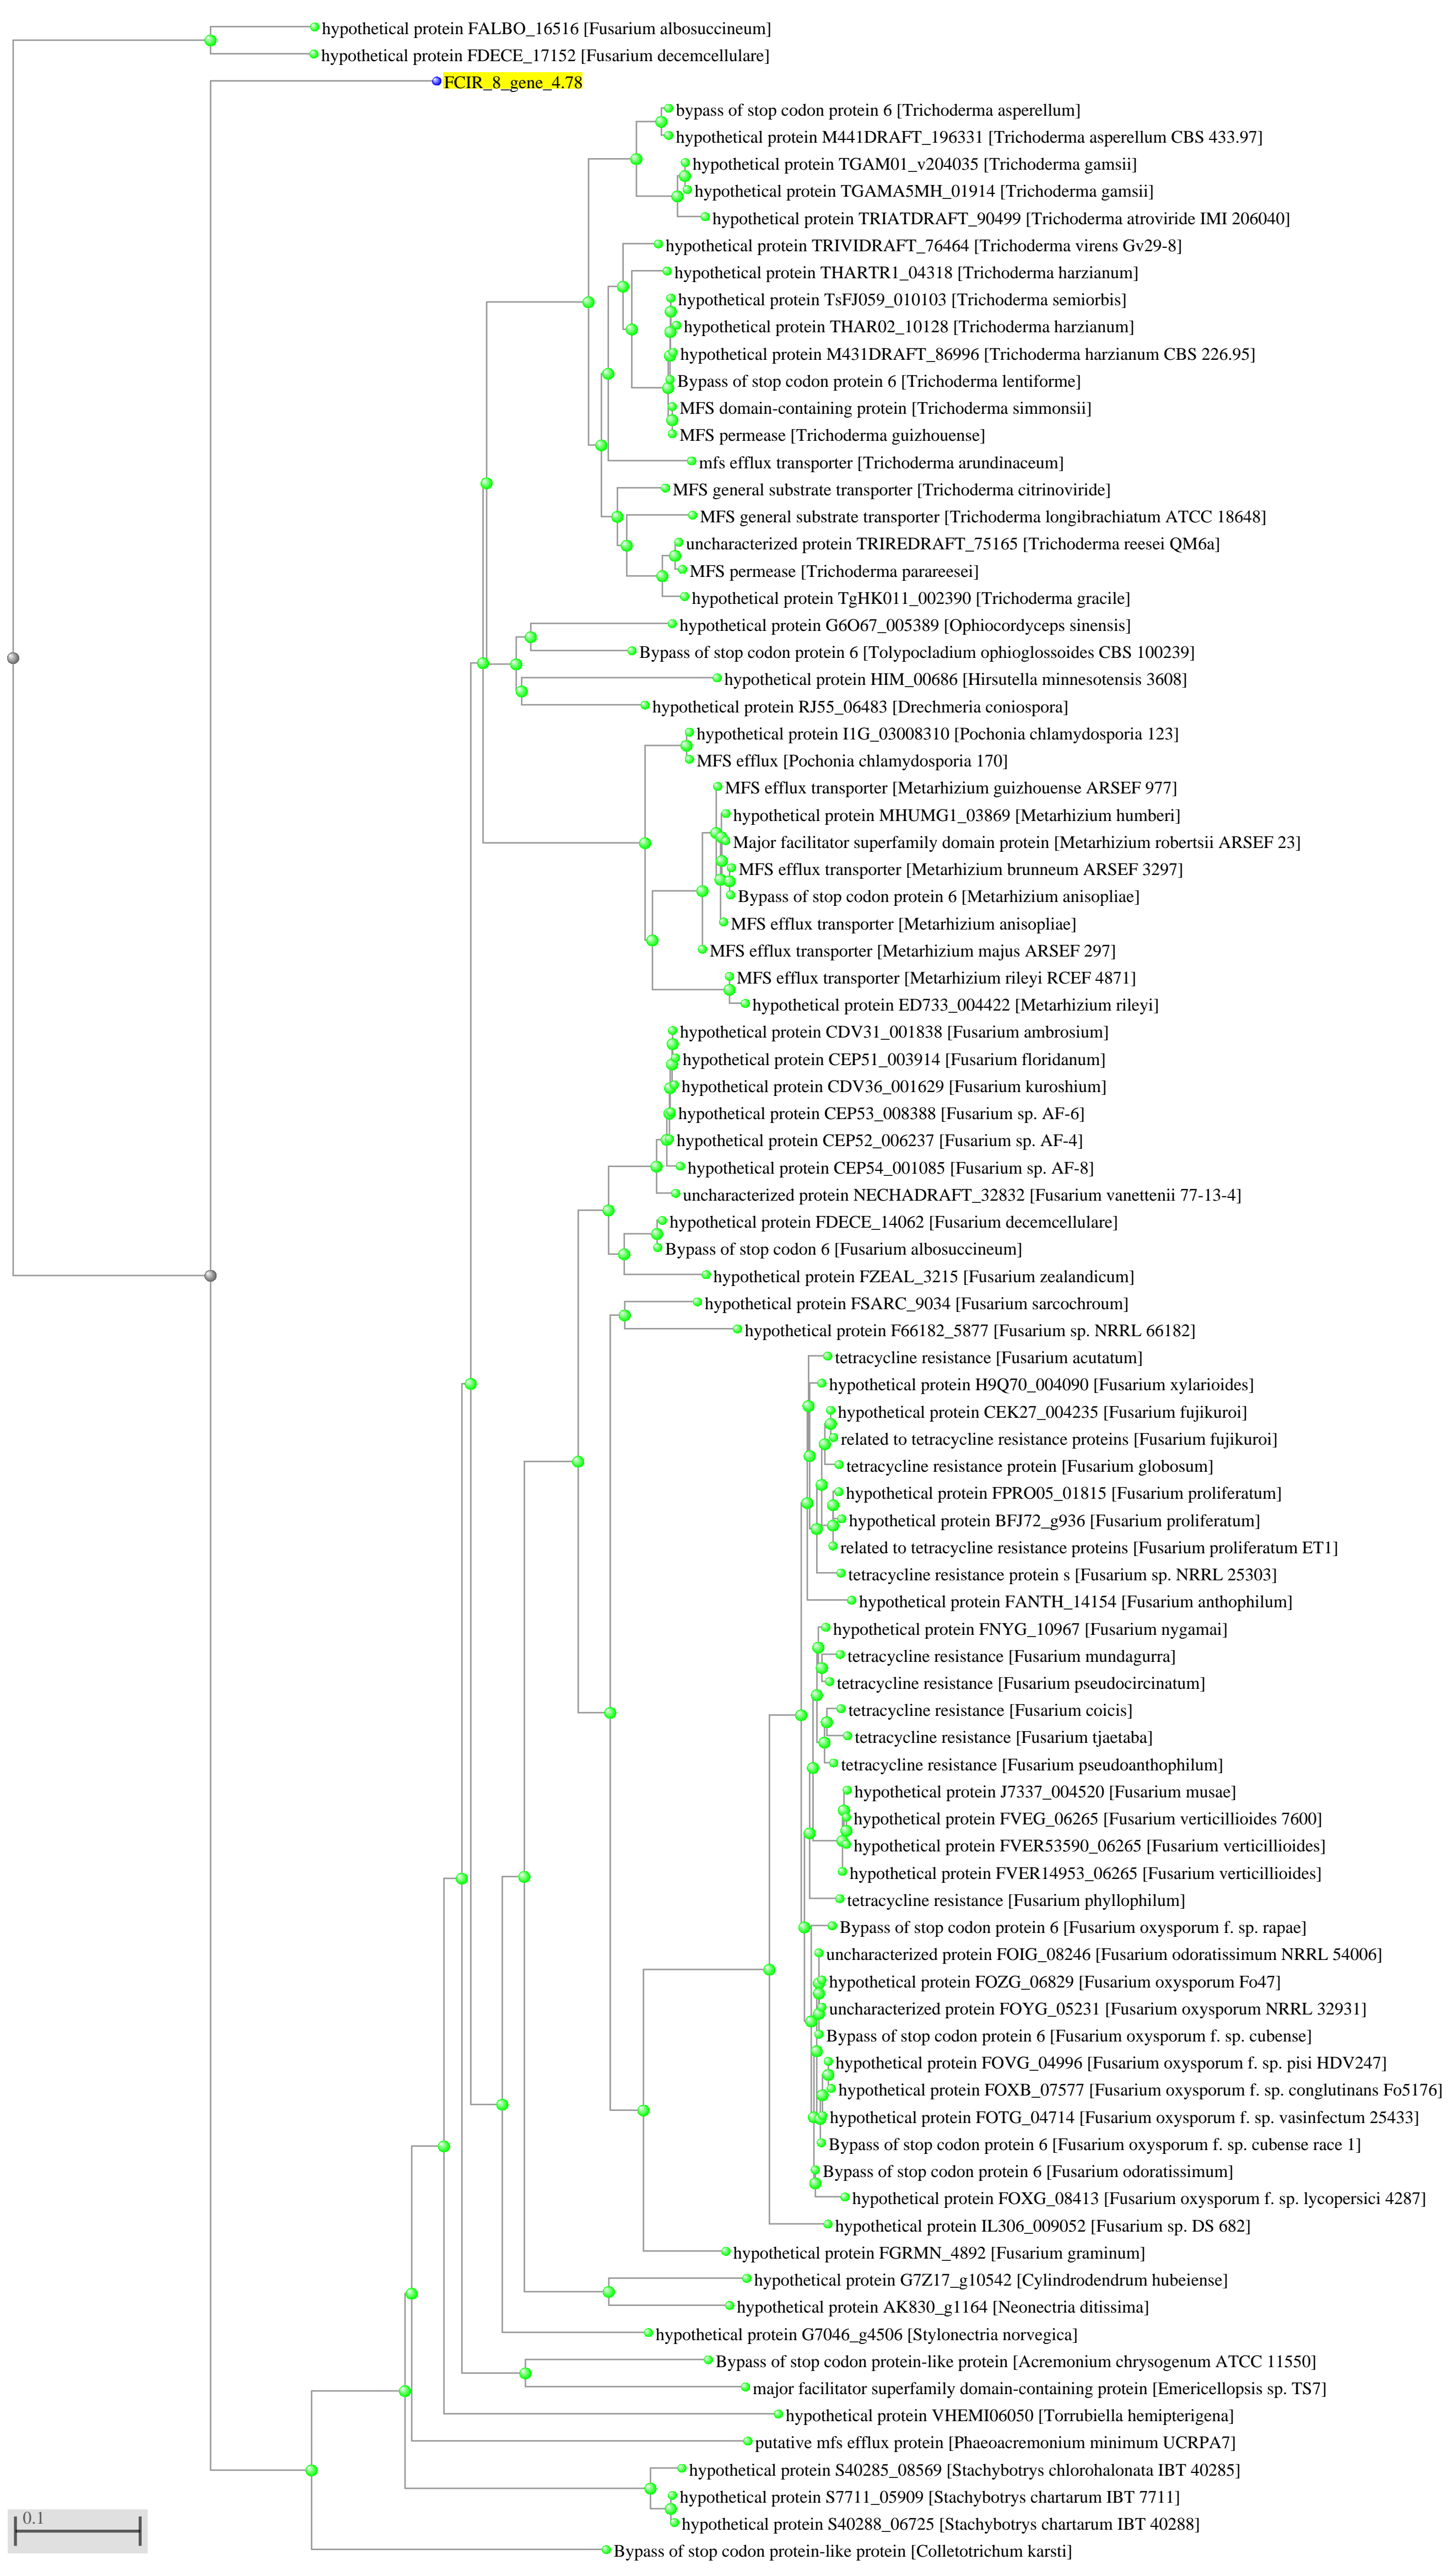



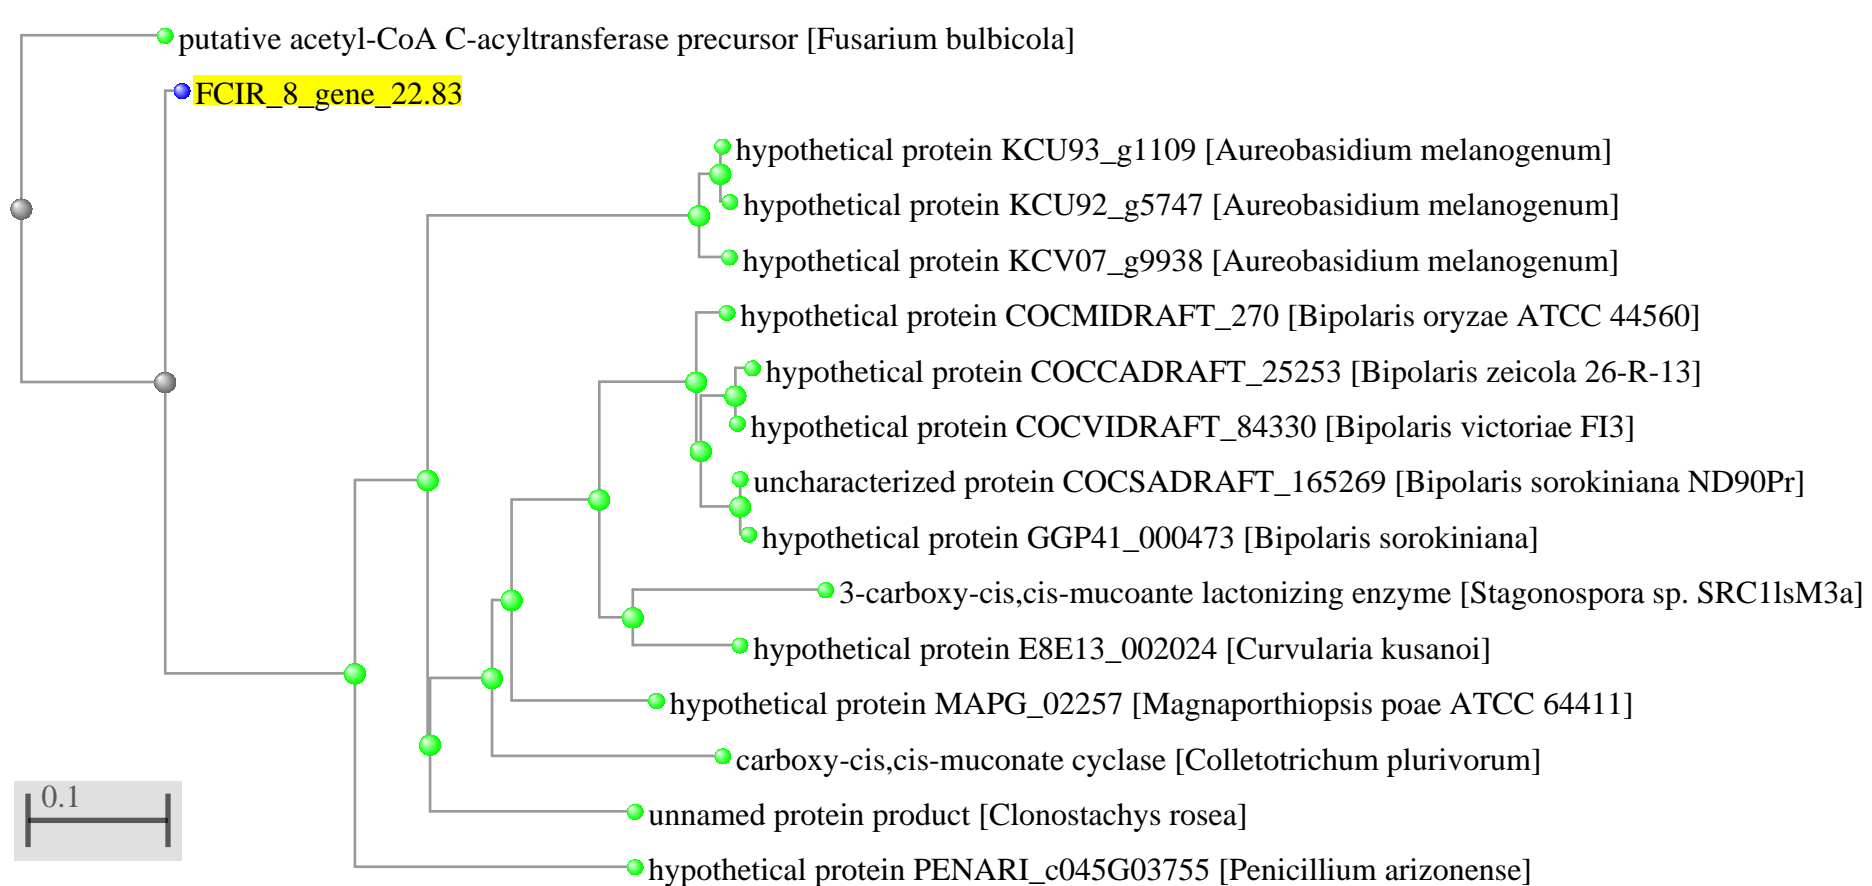



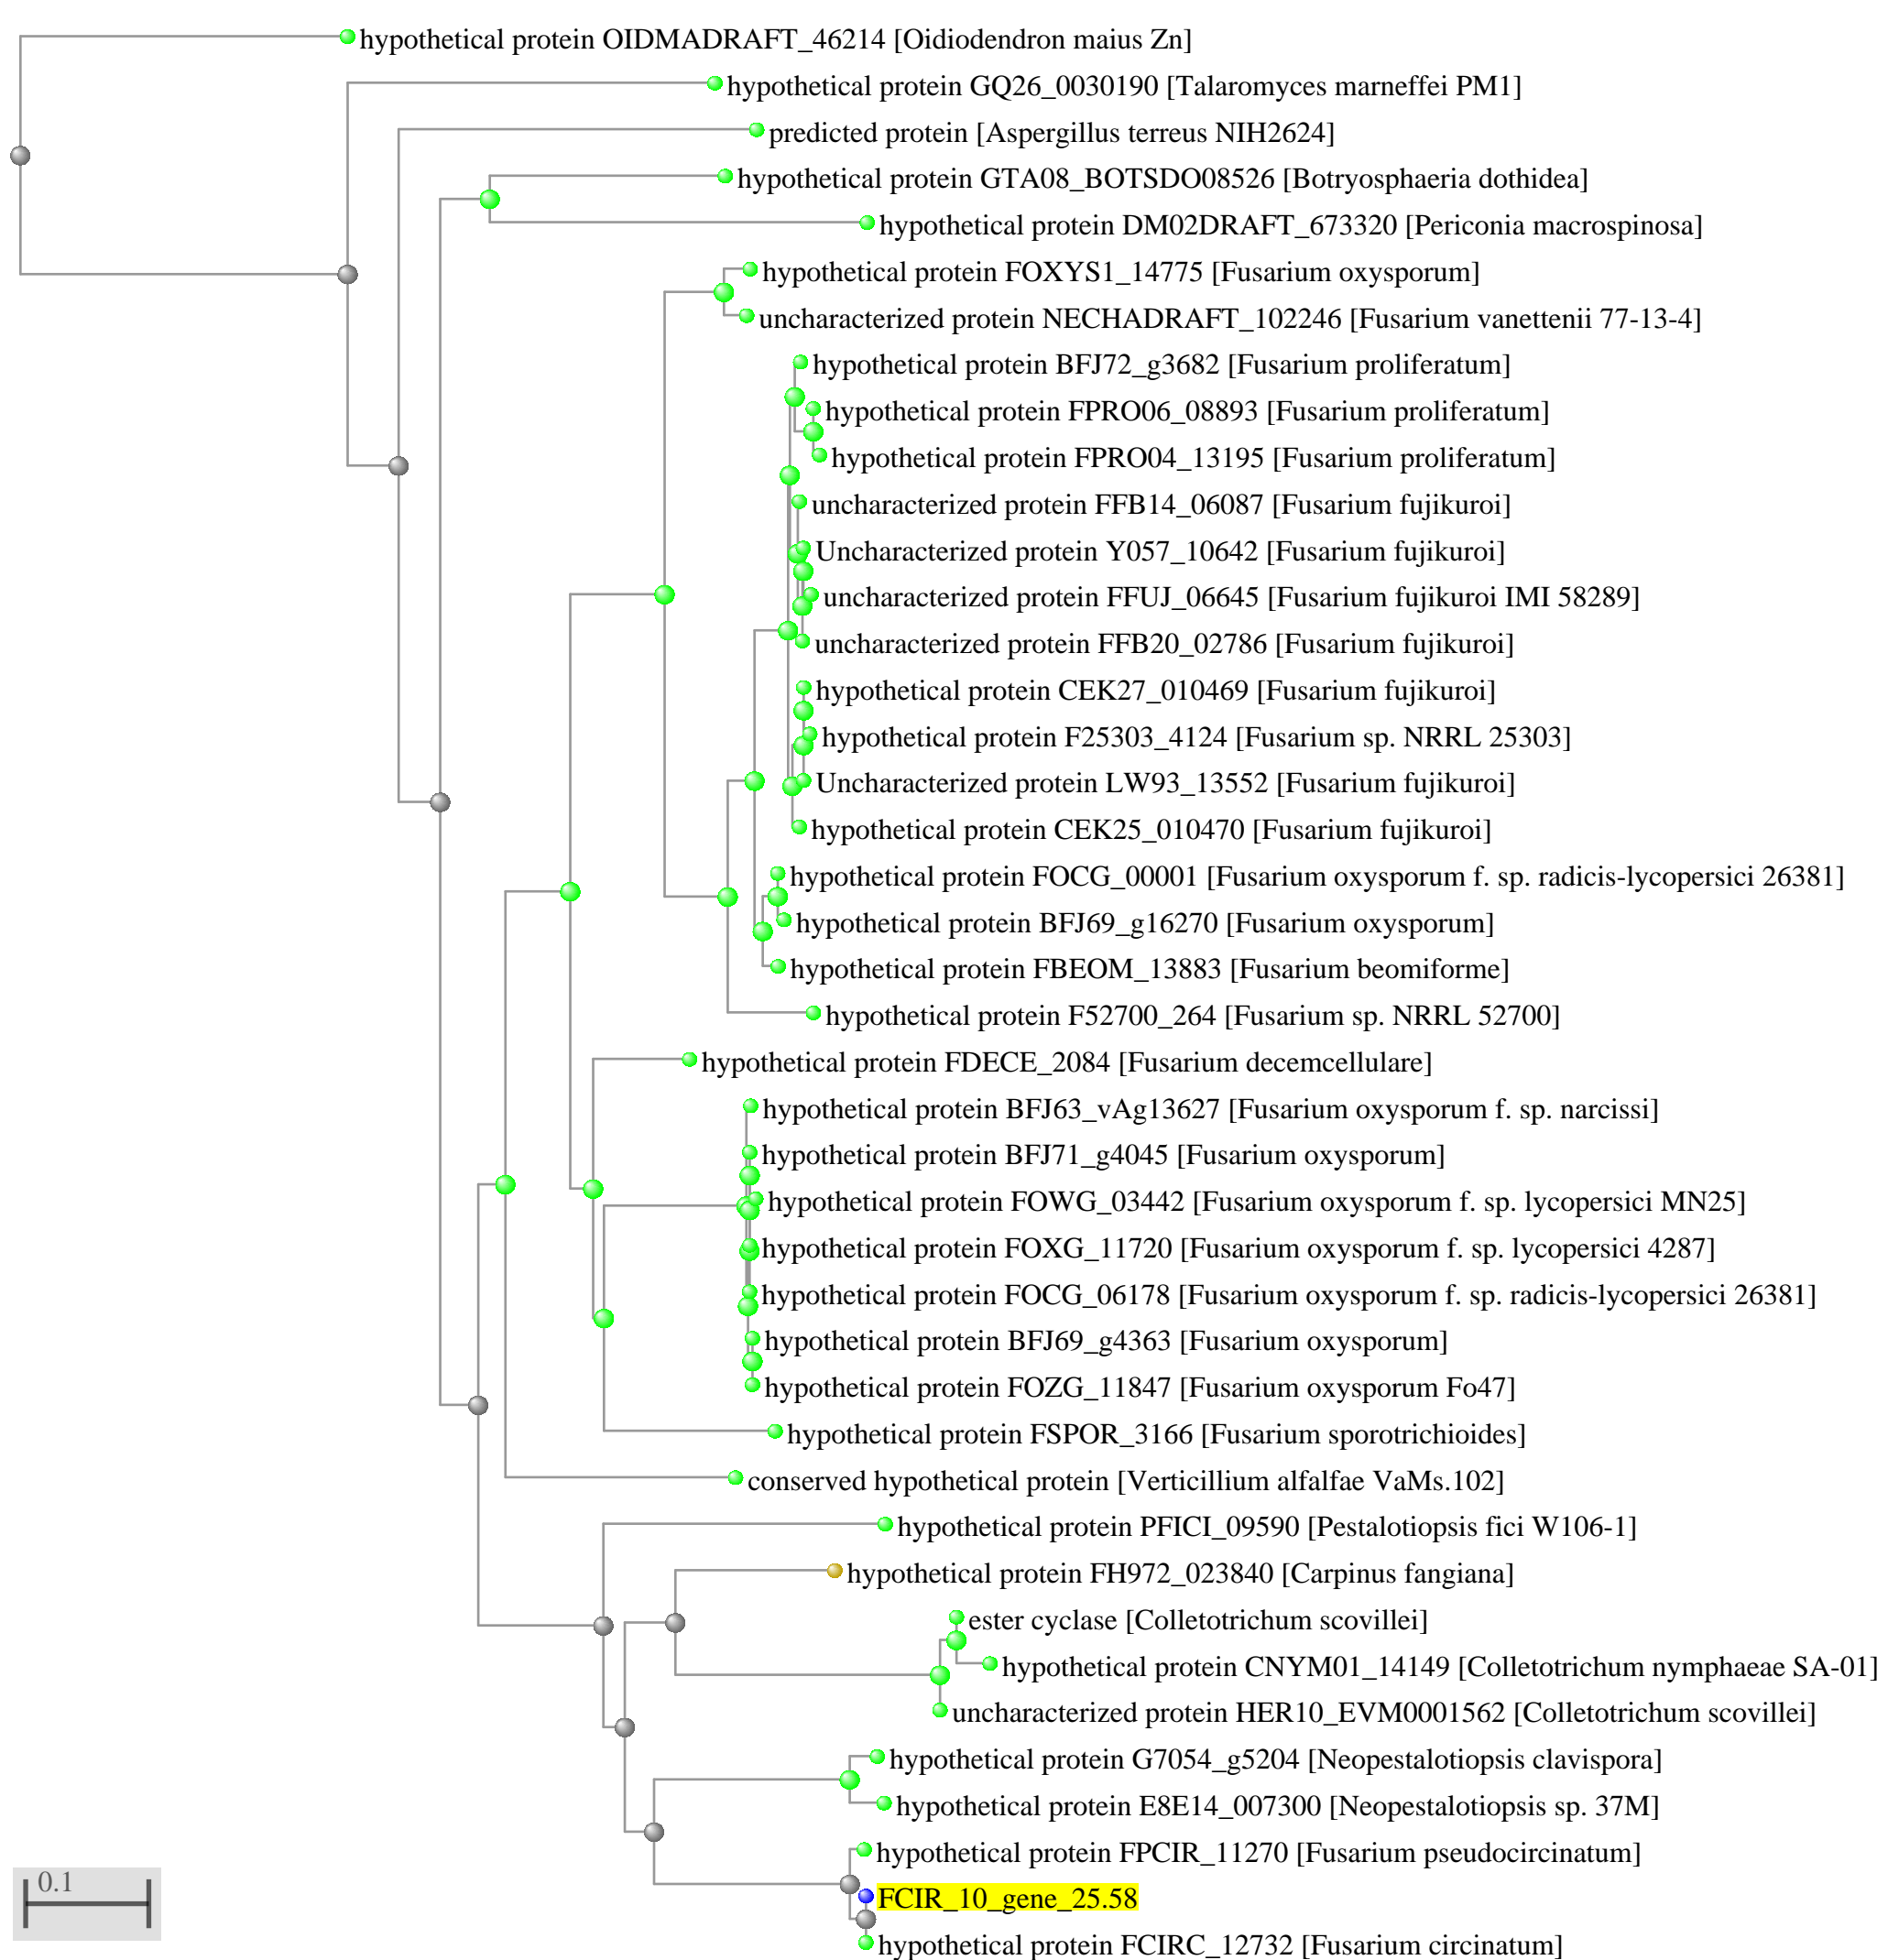

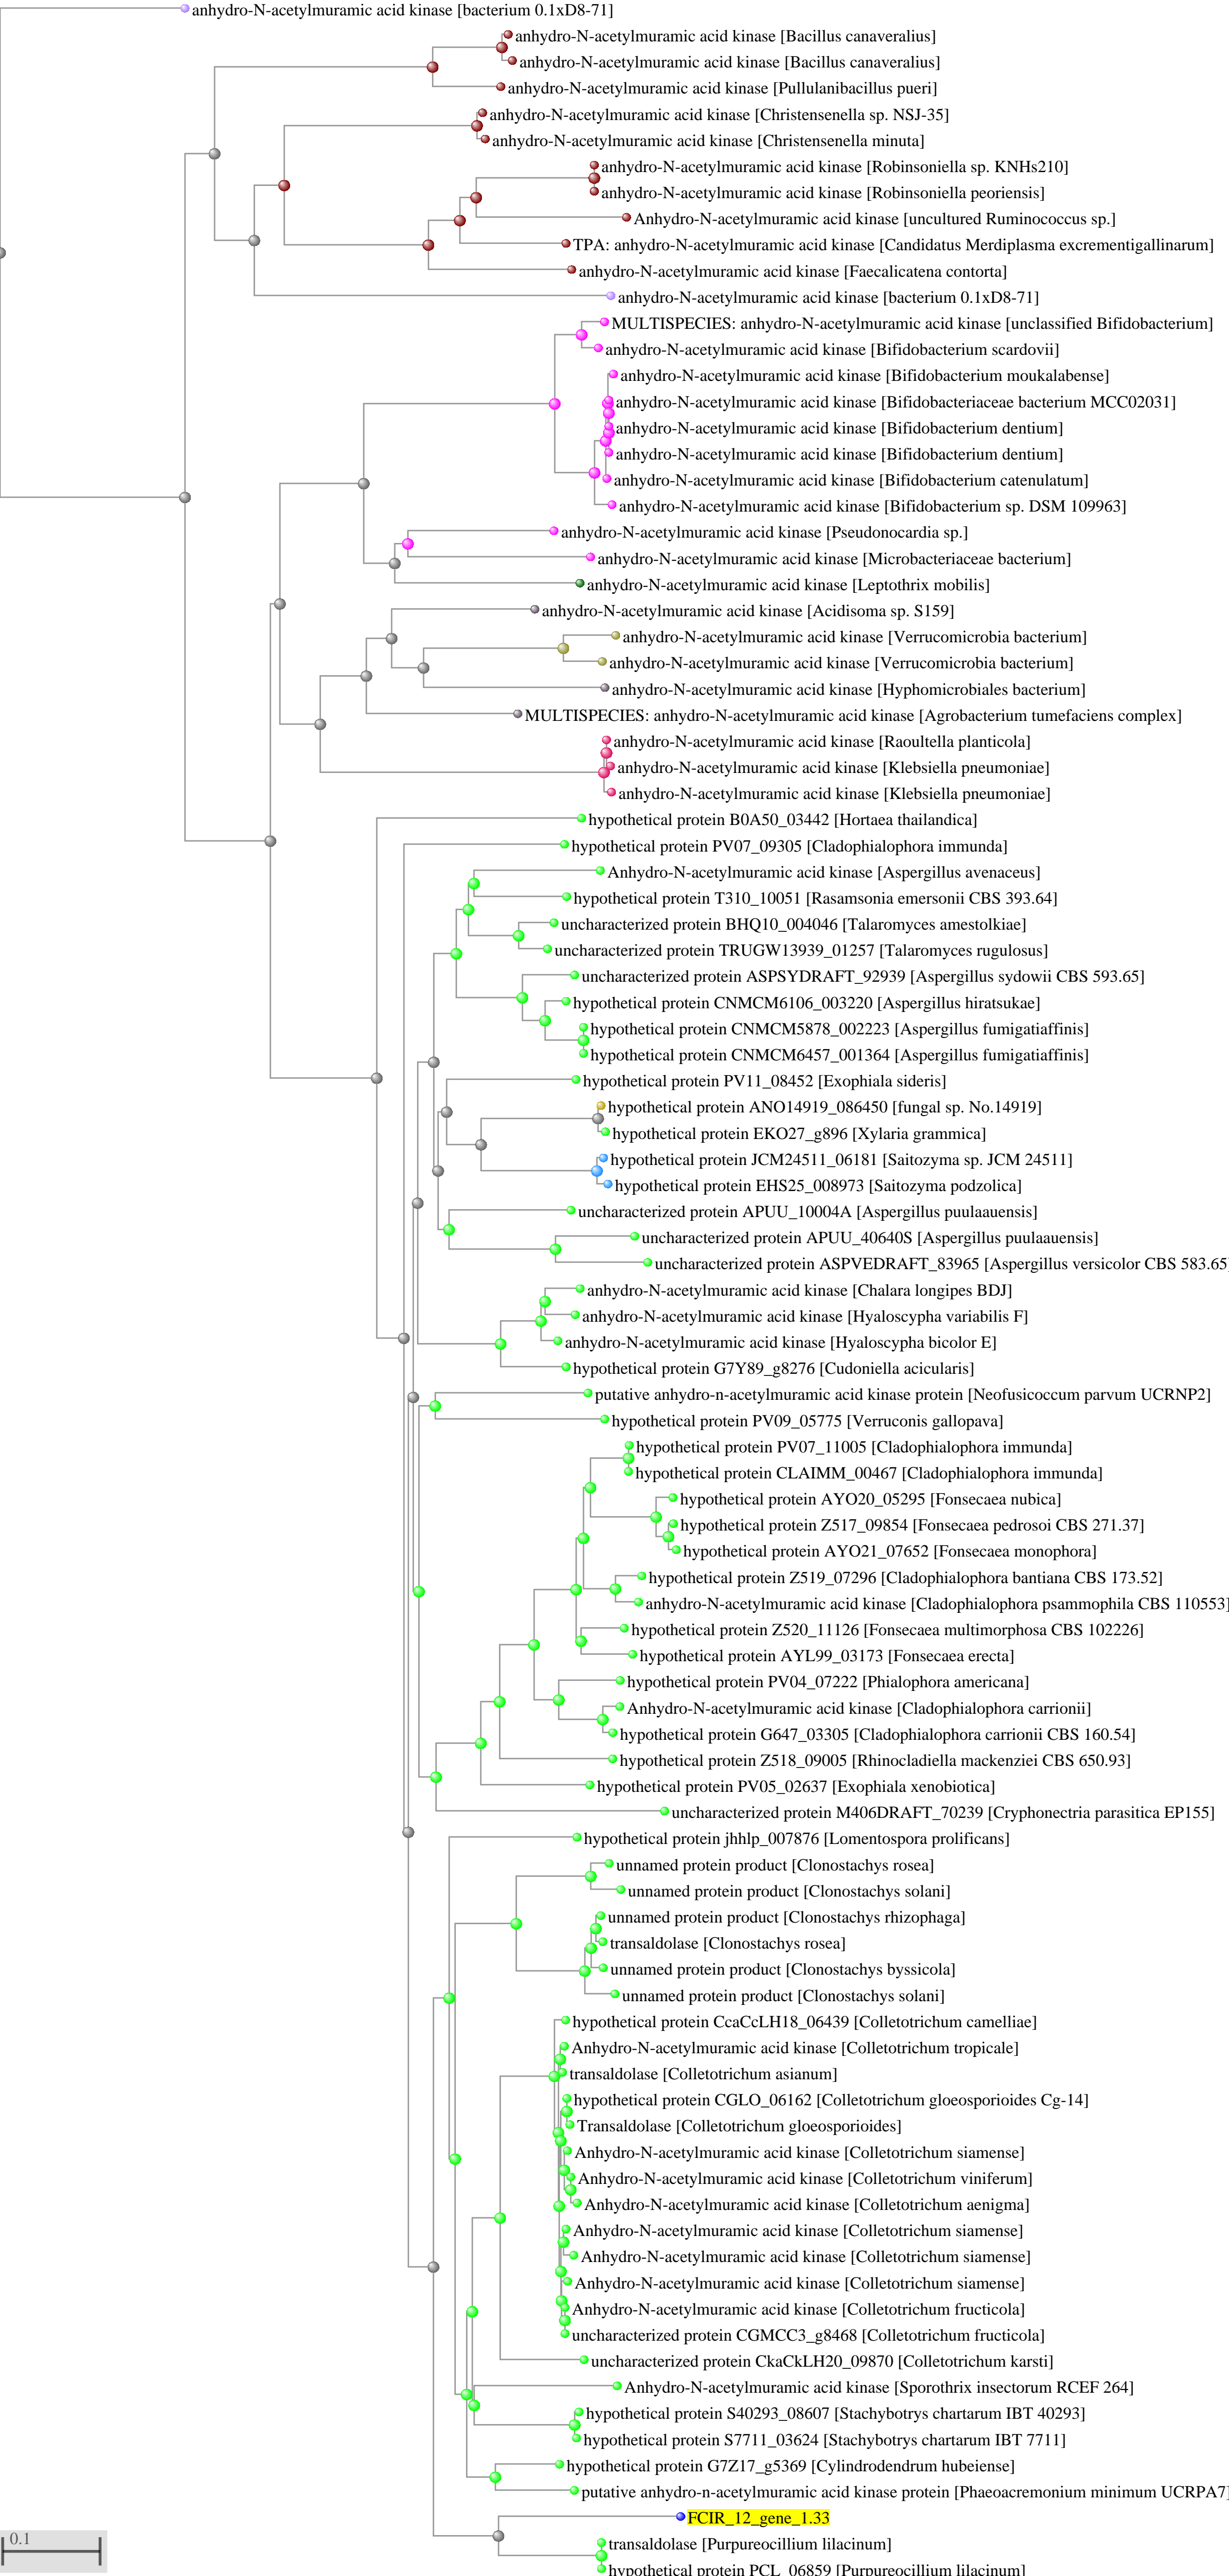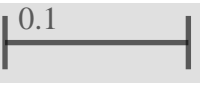

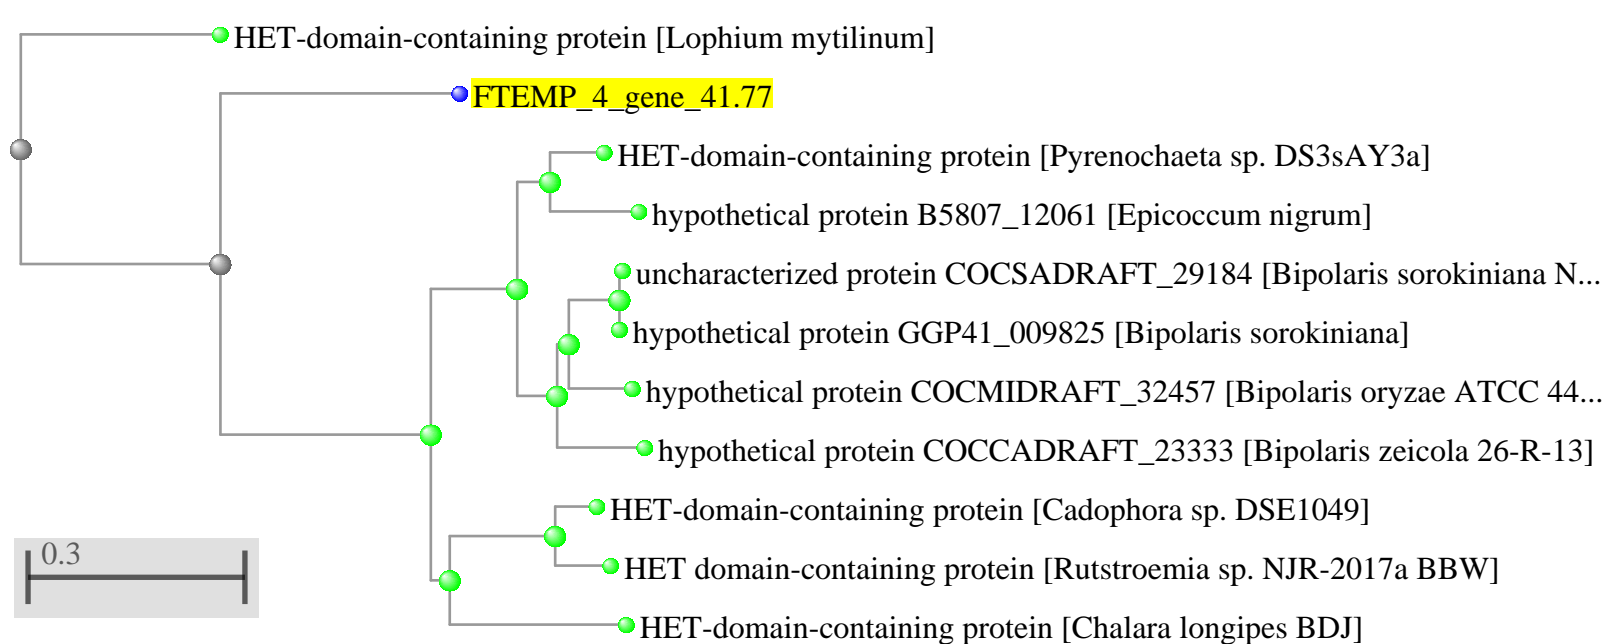



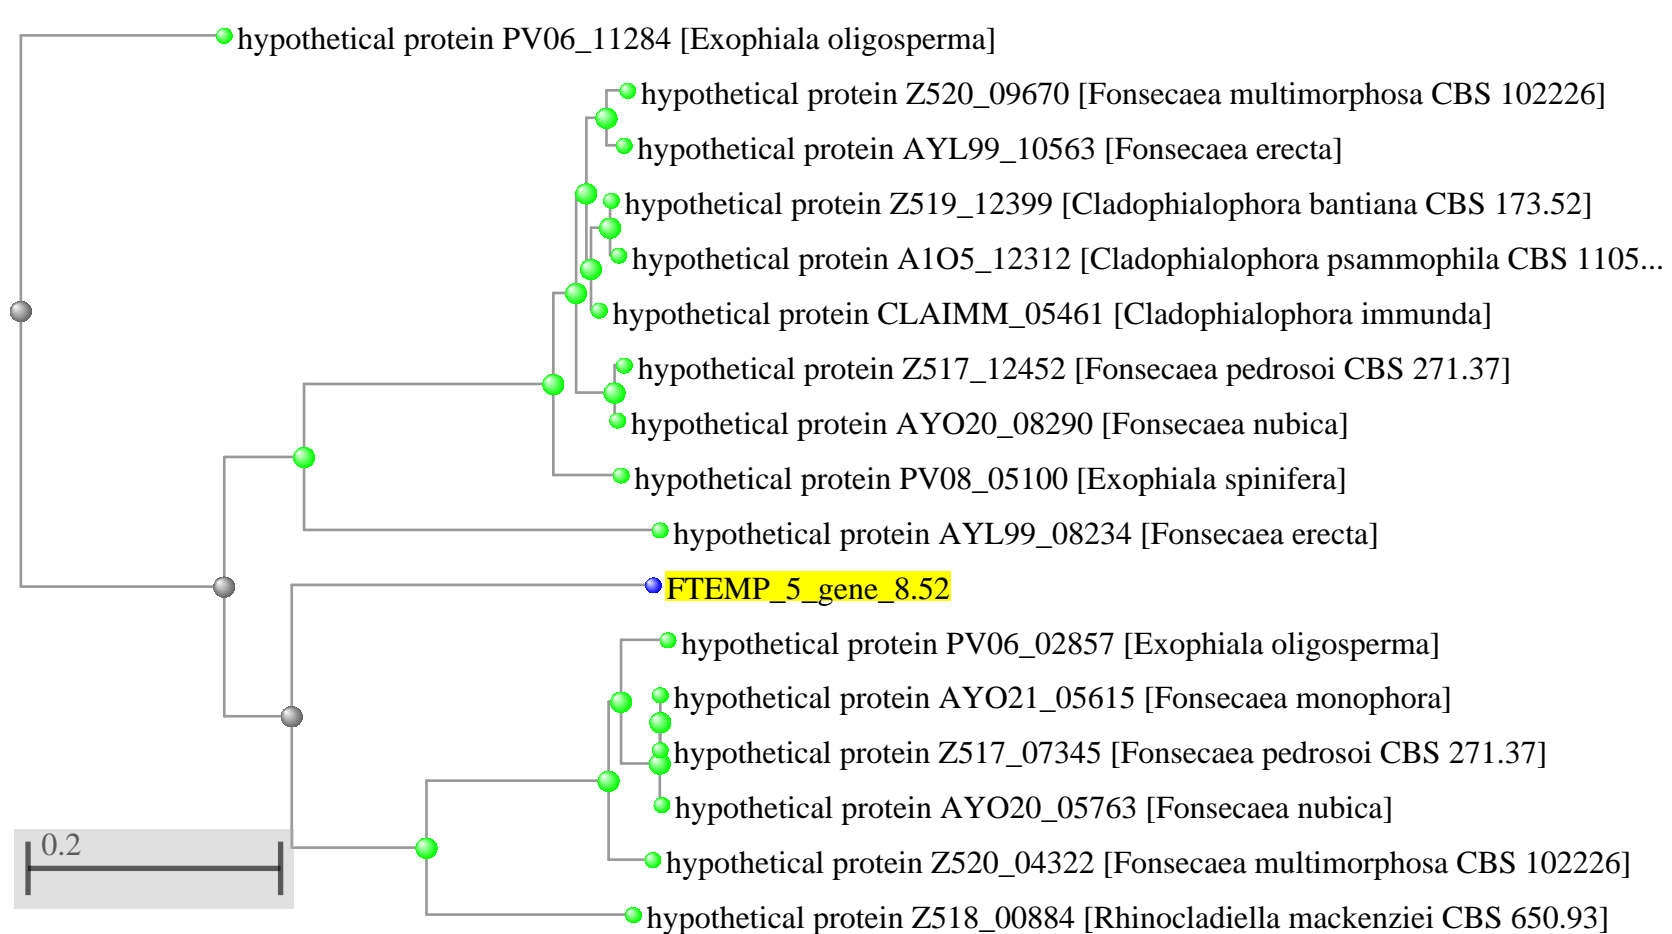

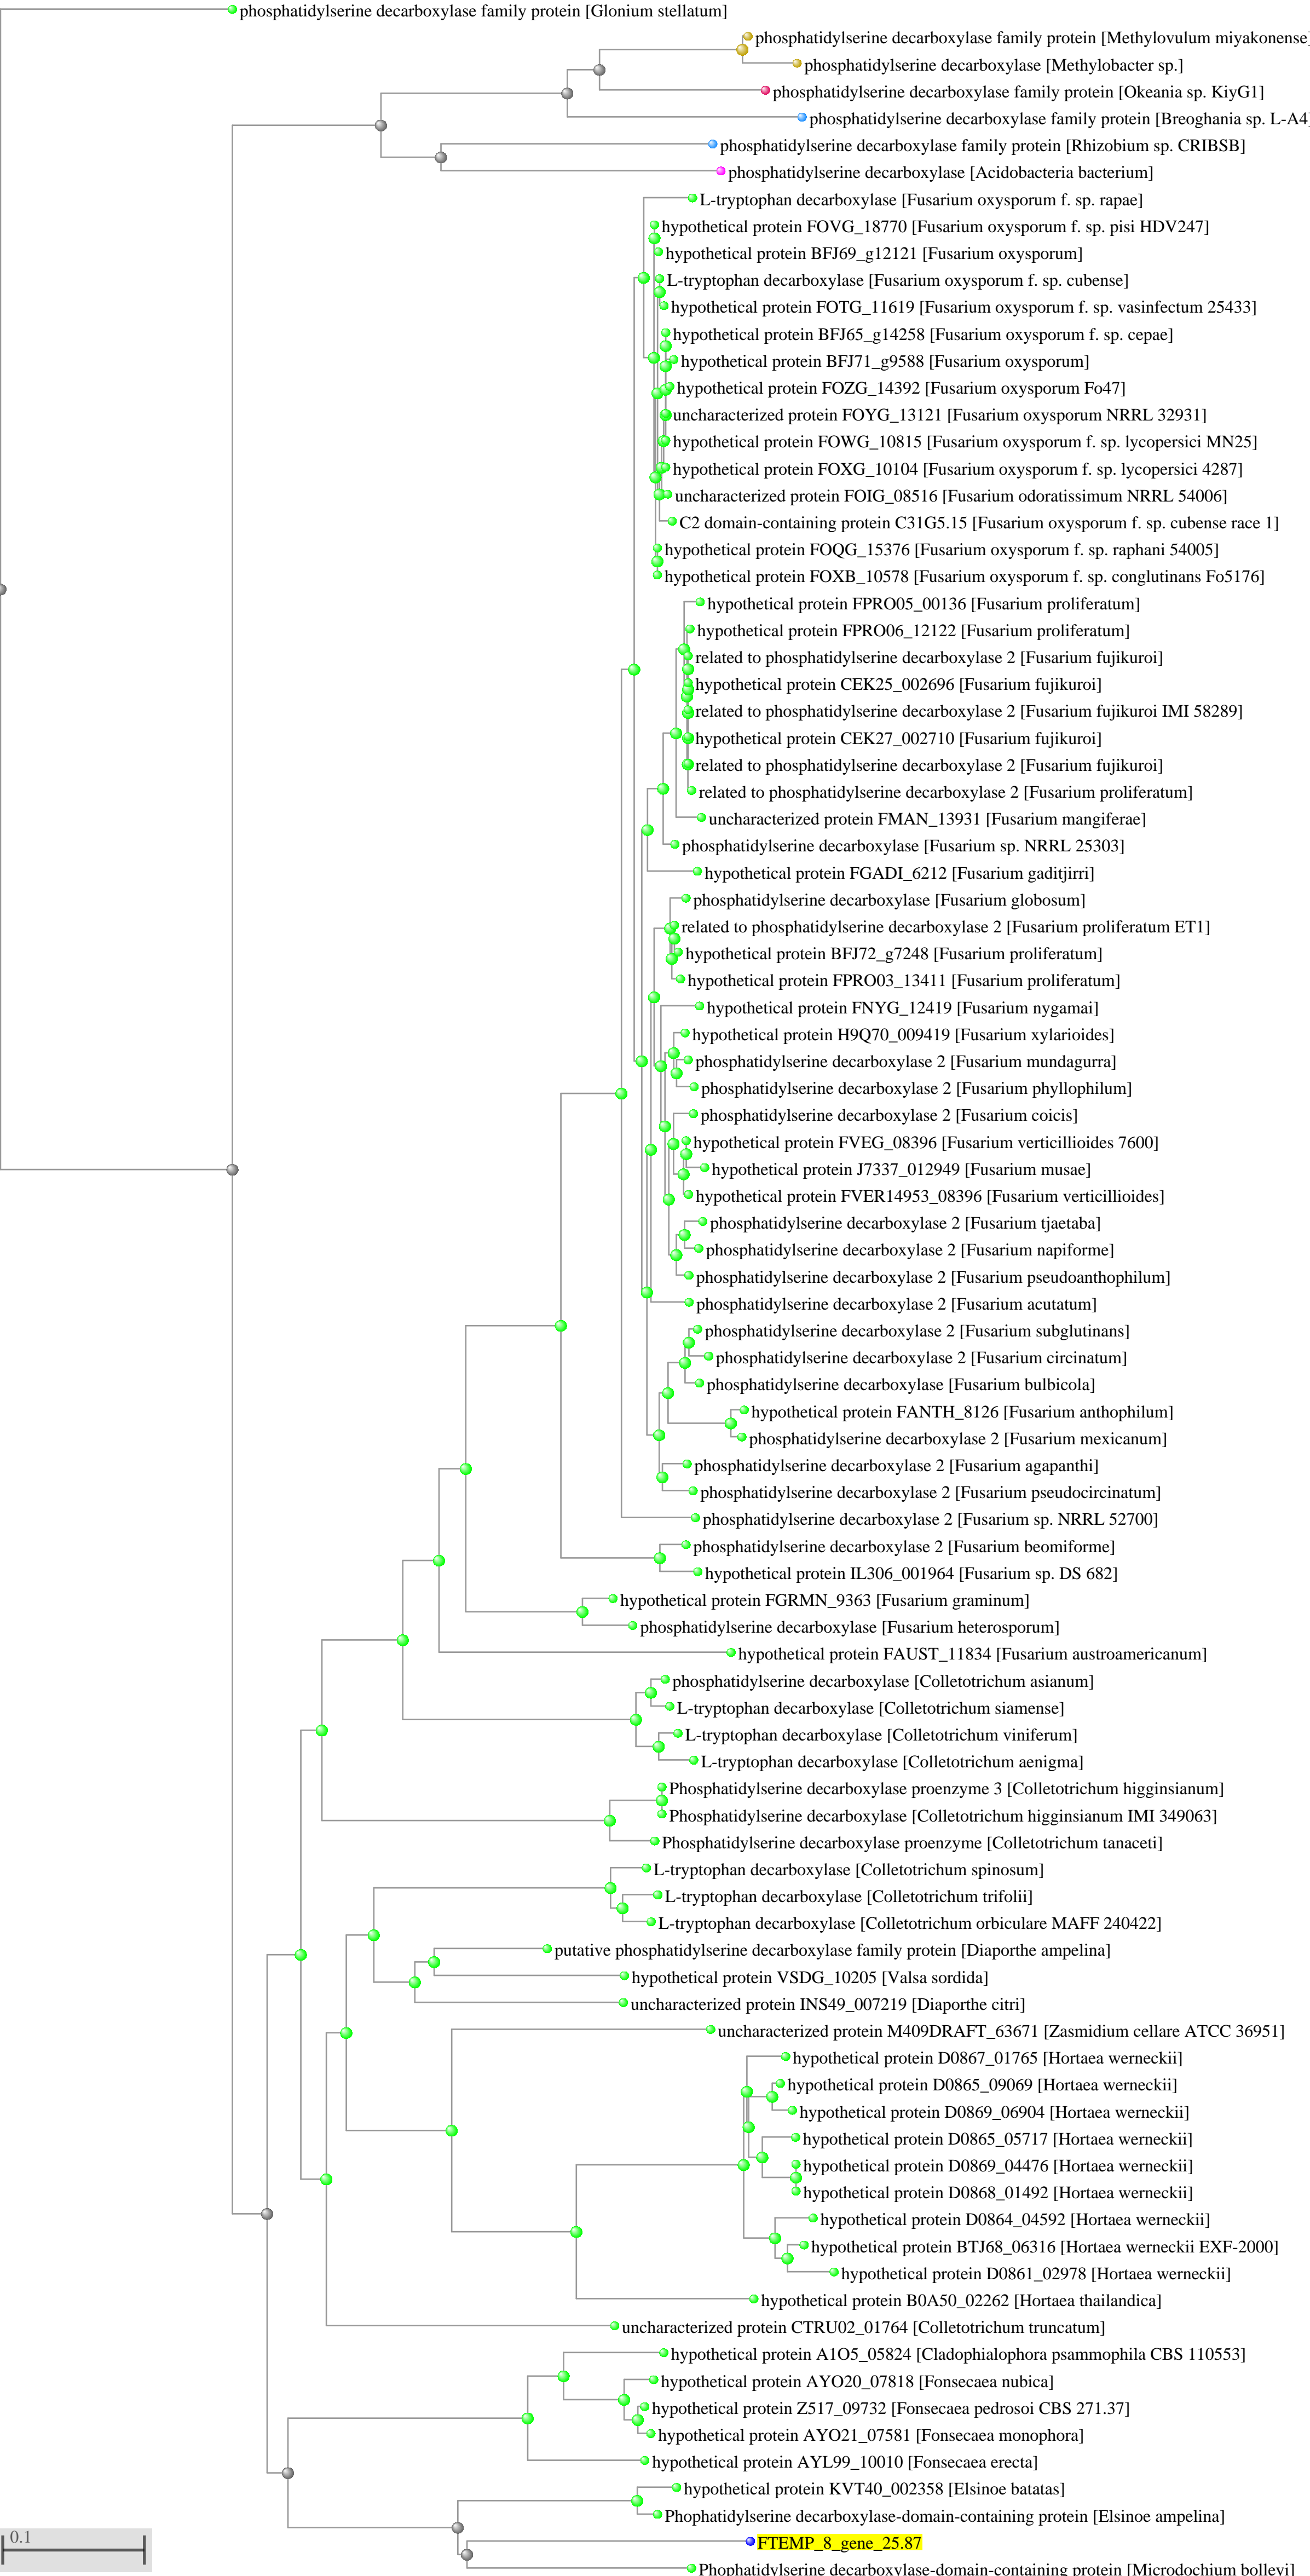

FTEMP\_8\_gene\_26.79

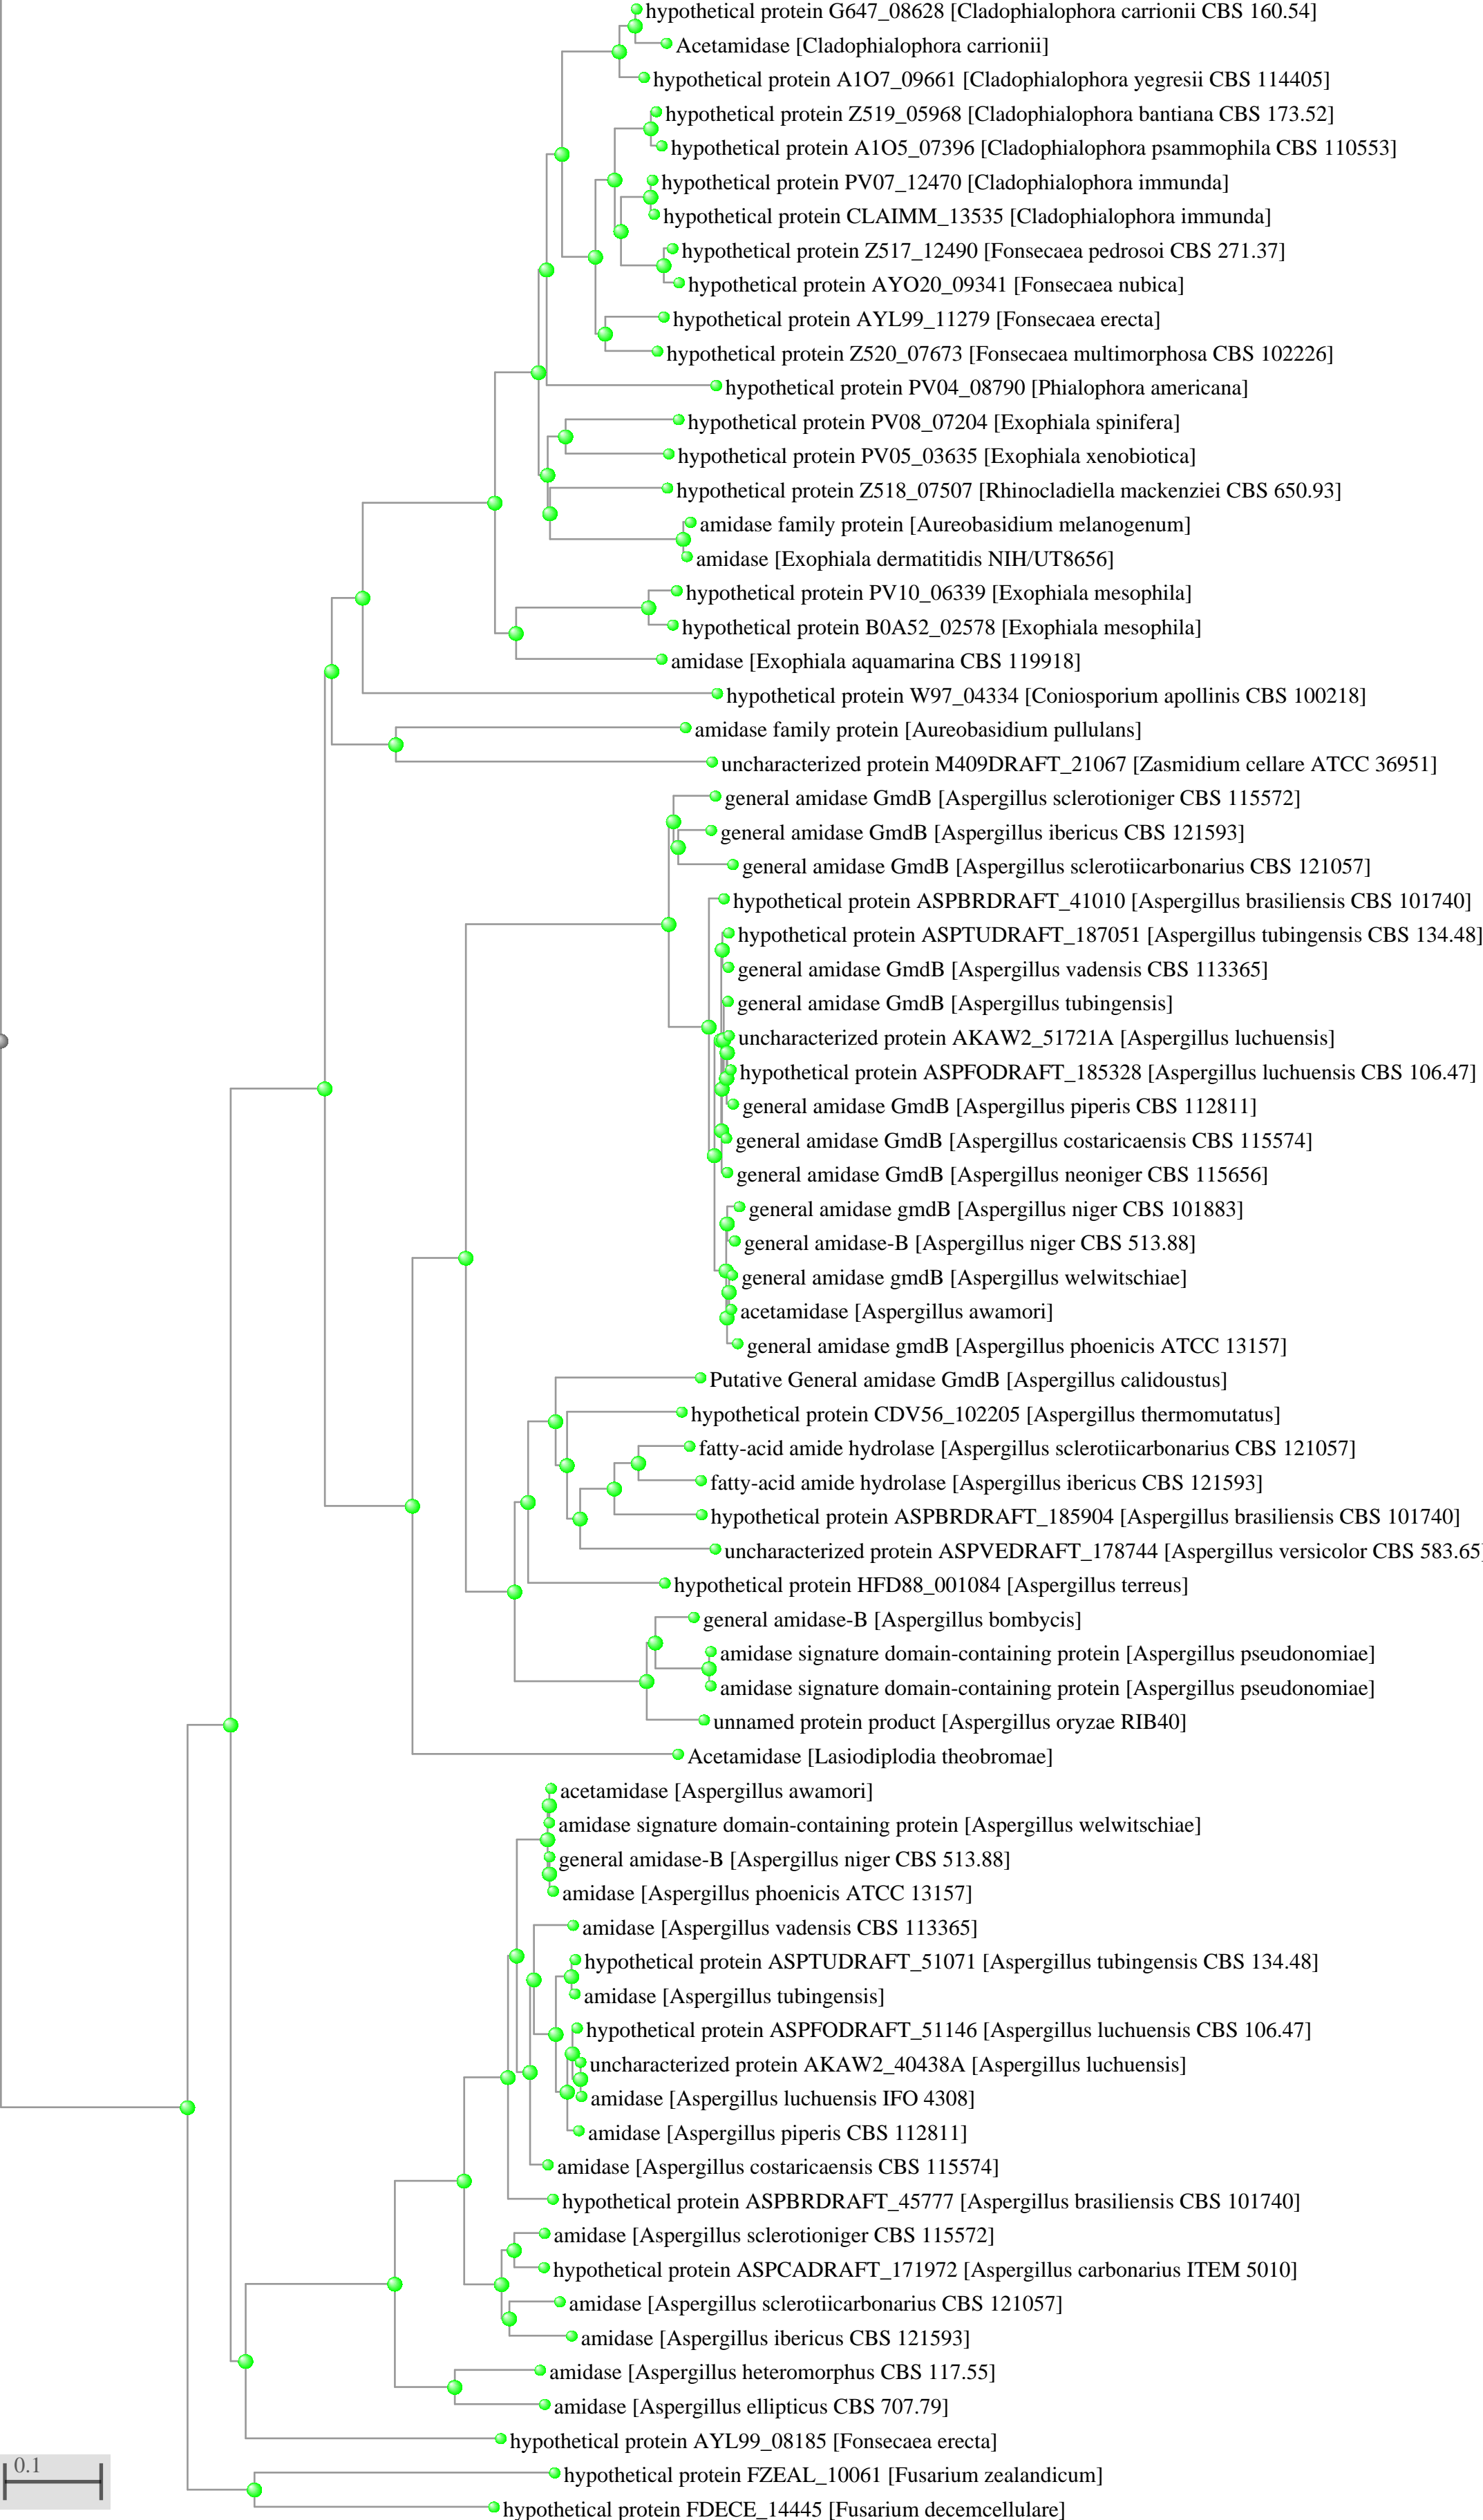

0.1



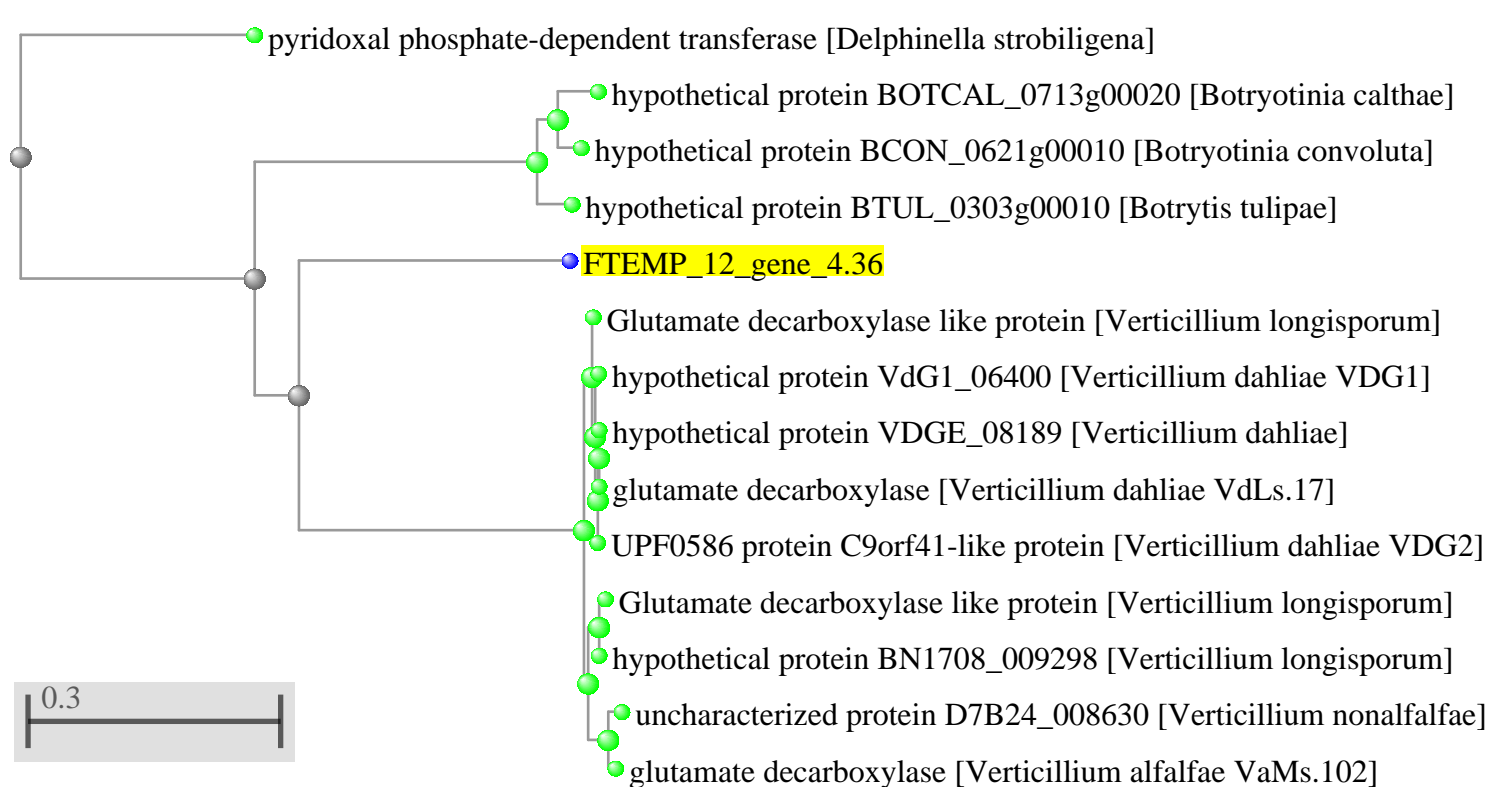

Supplement: Supplementary file 5 [file supplementary]
