# Supplementary material for: Characterization of Host-Specific Genes from Pine- and Grass-Associated Species of the <em>Fusarium Fujikuroi </em>Species Complex
Source: Preprints.org preprint supplement (doi:10.20944/preprints202207.0007.v1), 2022-07-01

**Figure S2.** Host-range-associated genes with ancestral origins that emerged within the FFSC. Host-range-associated genes investigated are highlighted in yellow; FCIR = *Fusarium circinatum* and FTEMP= *Fusarium temperatum*.

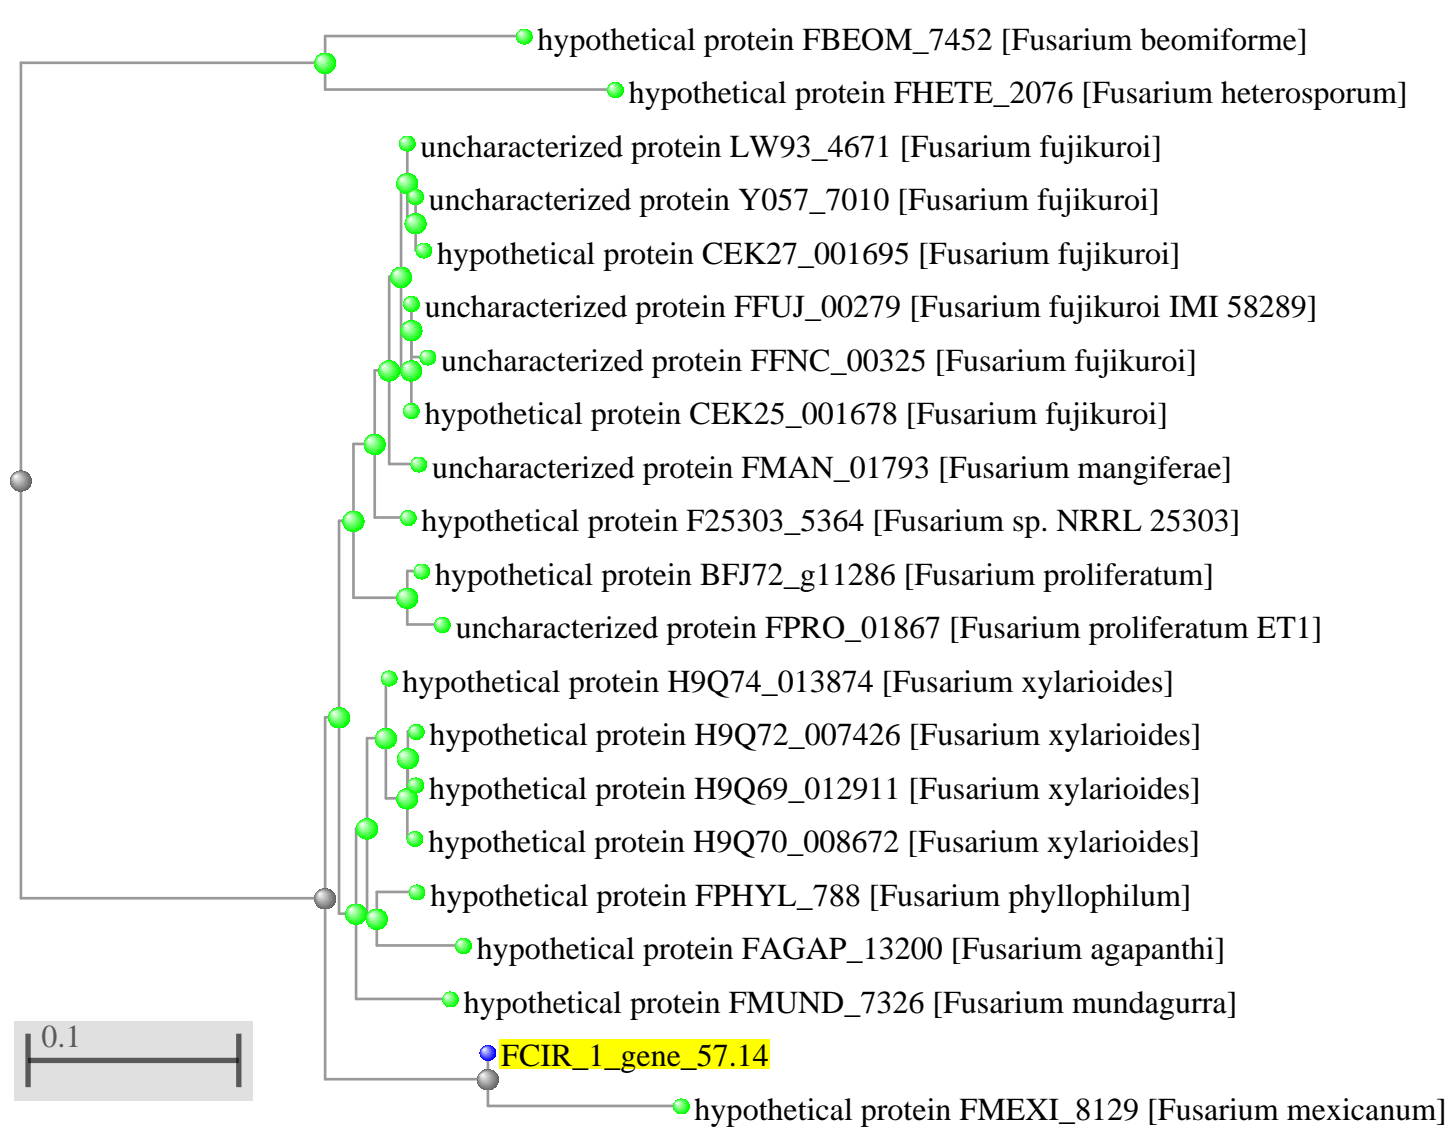

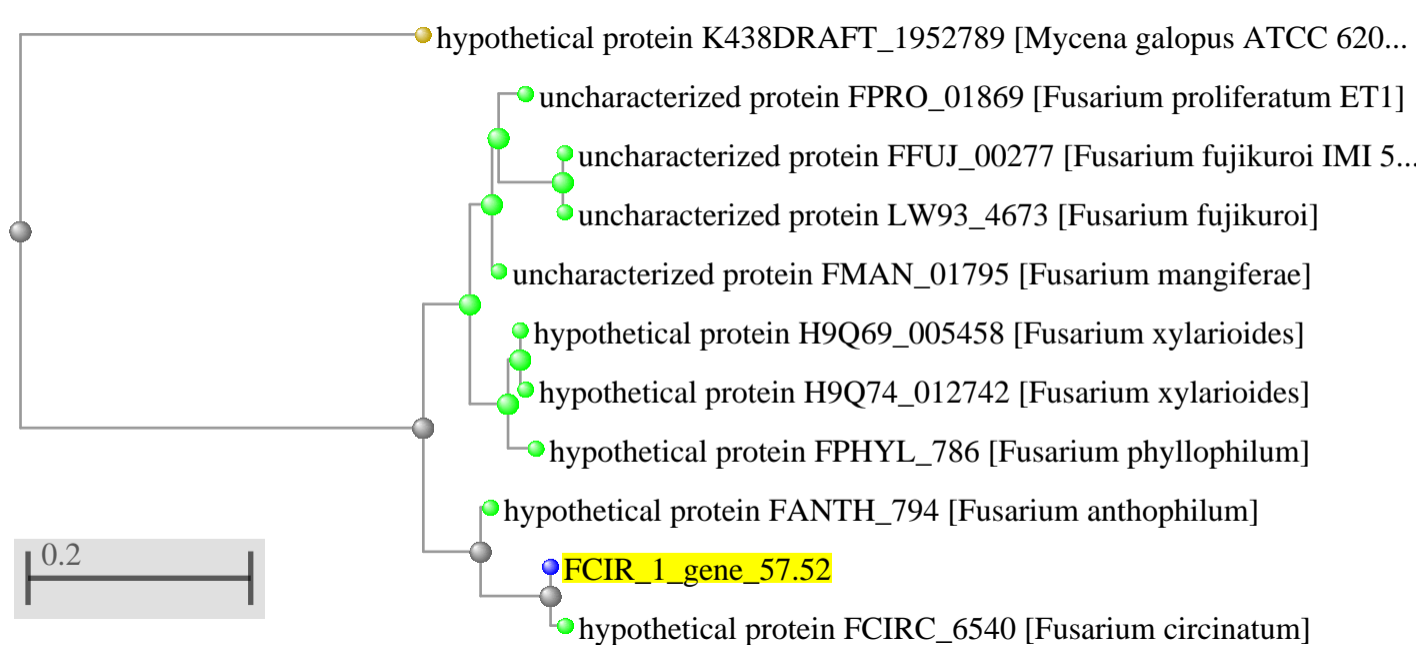

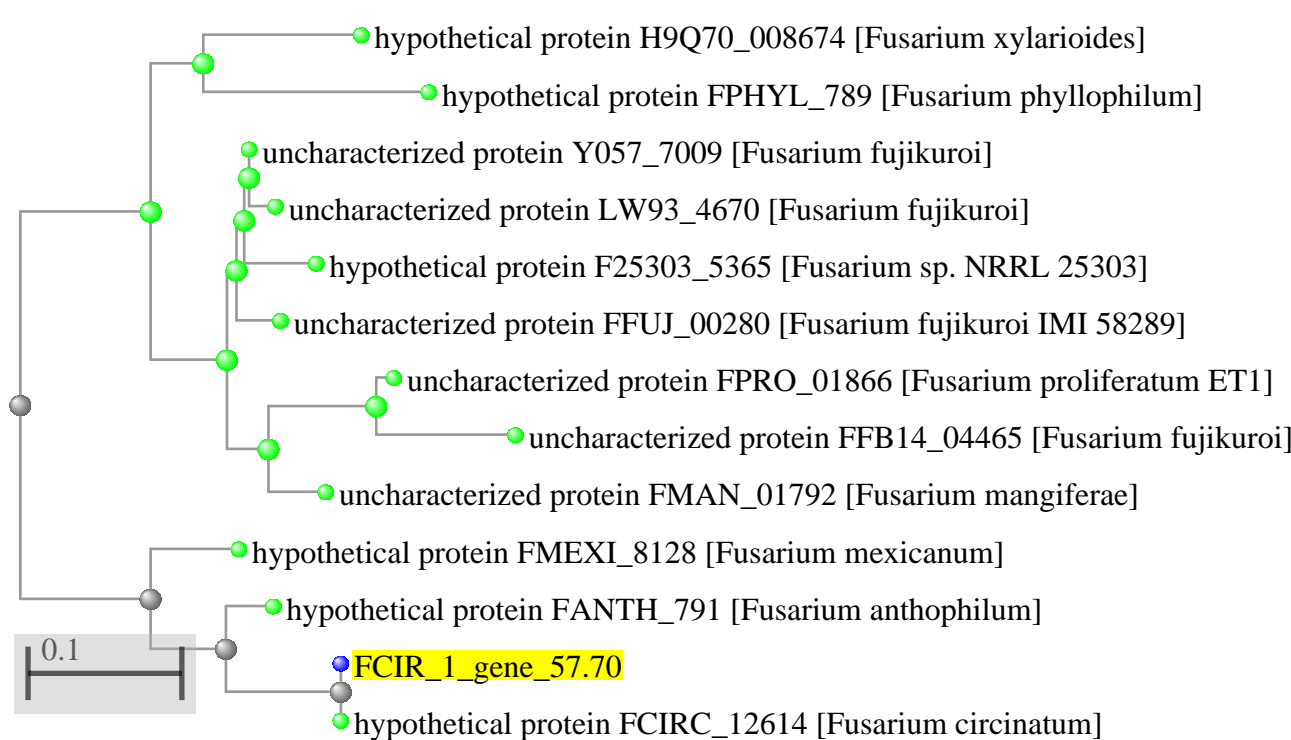

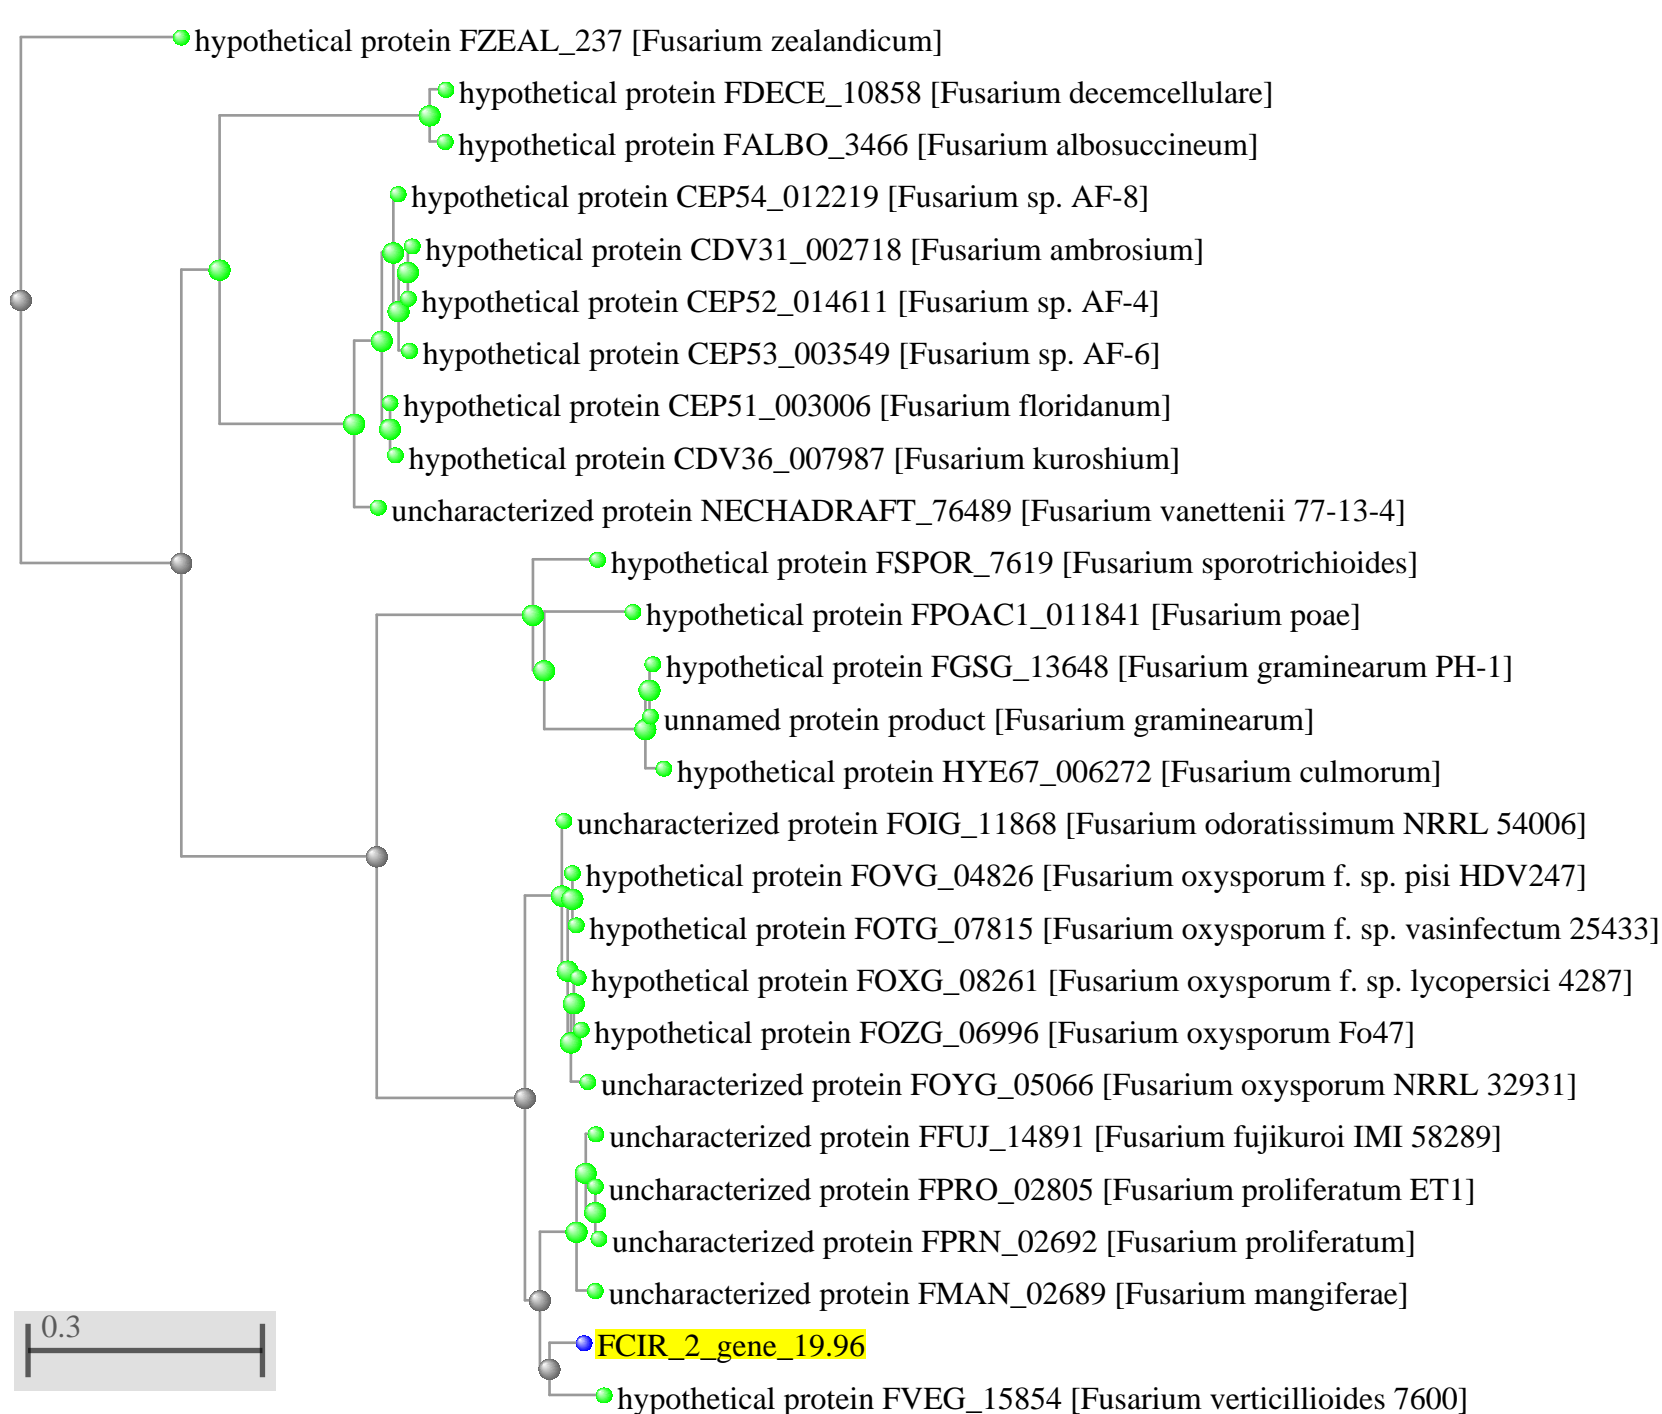

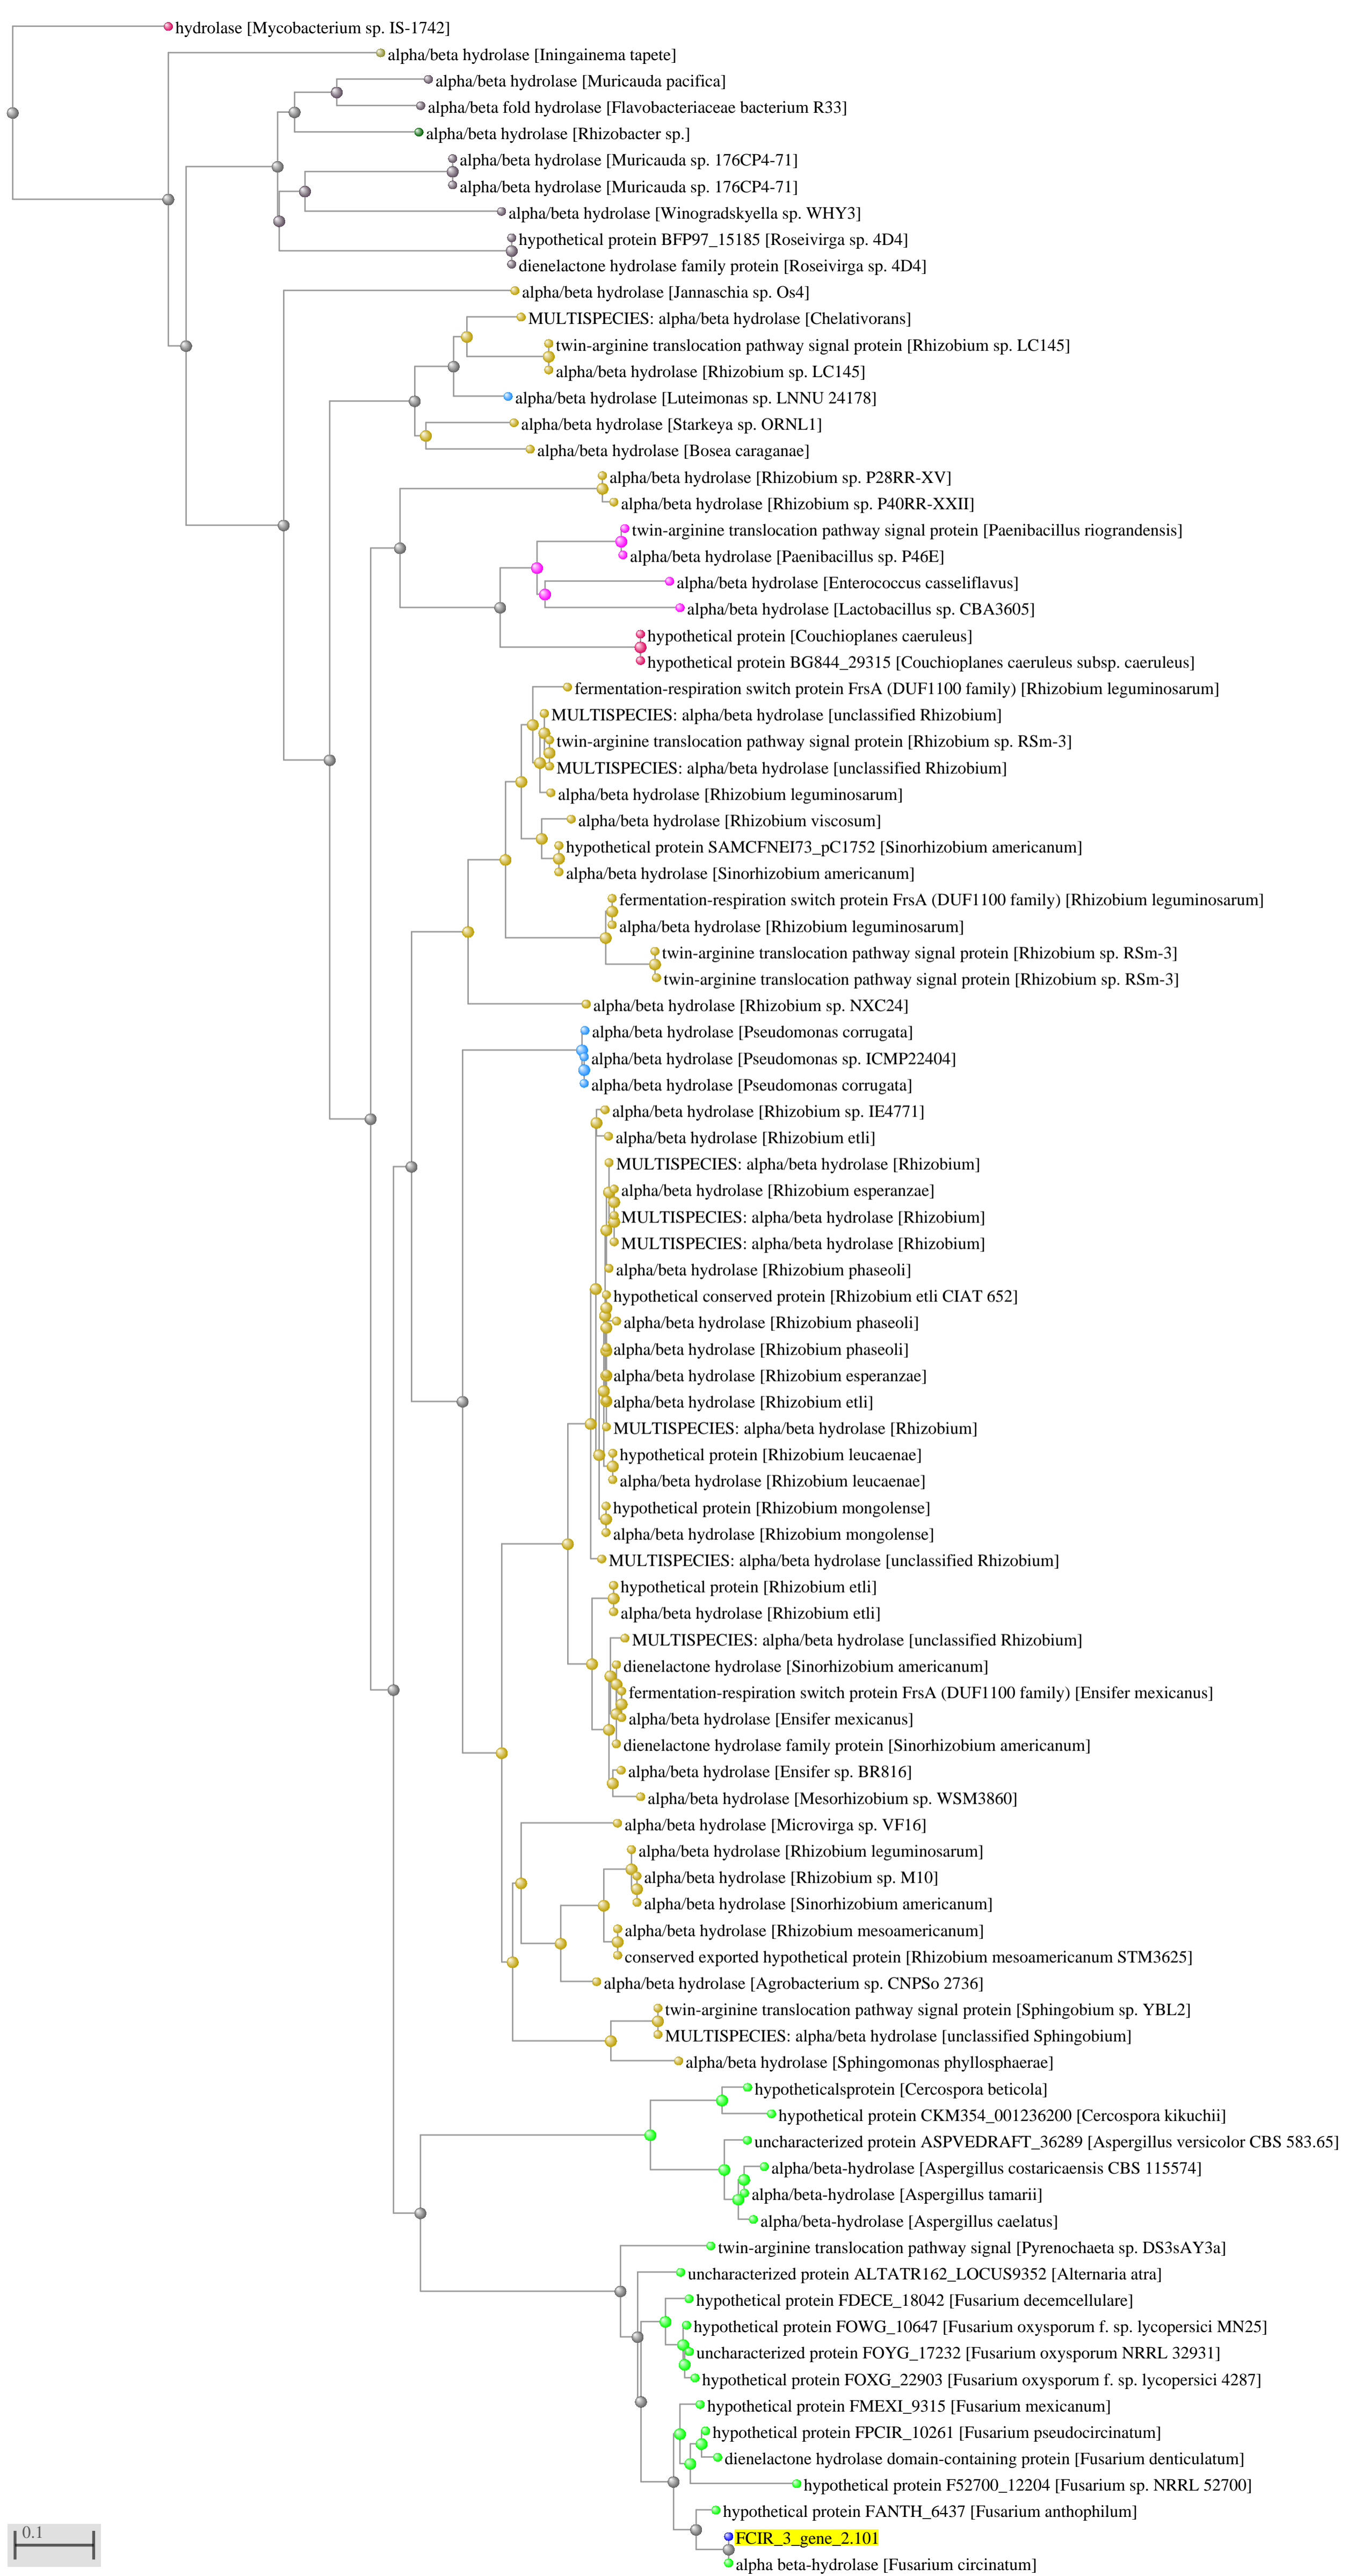

0.1

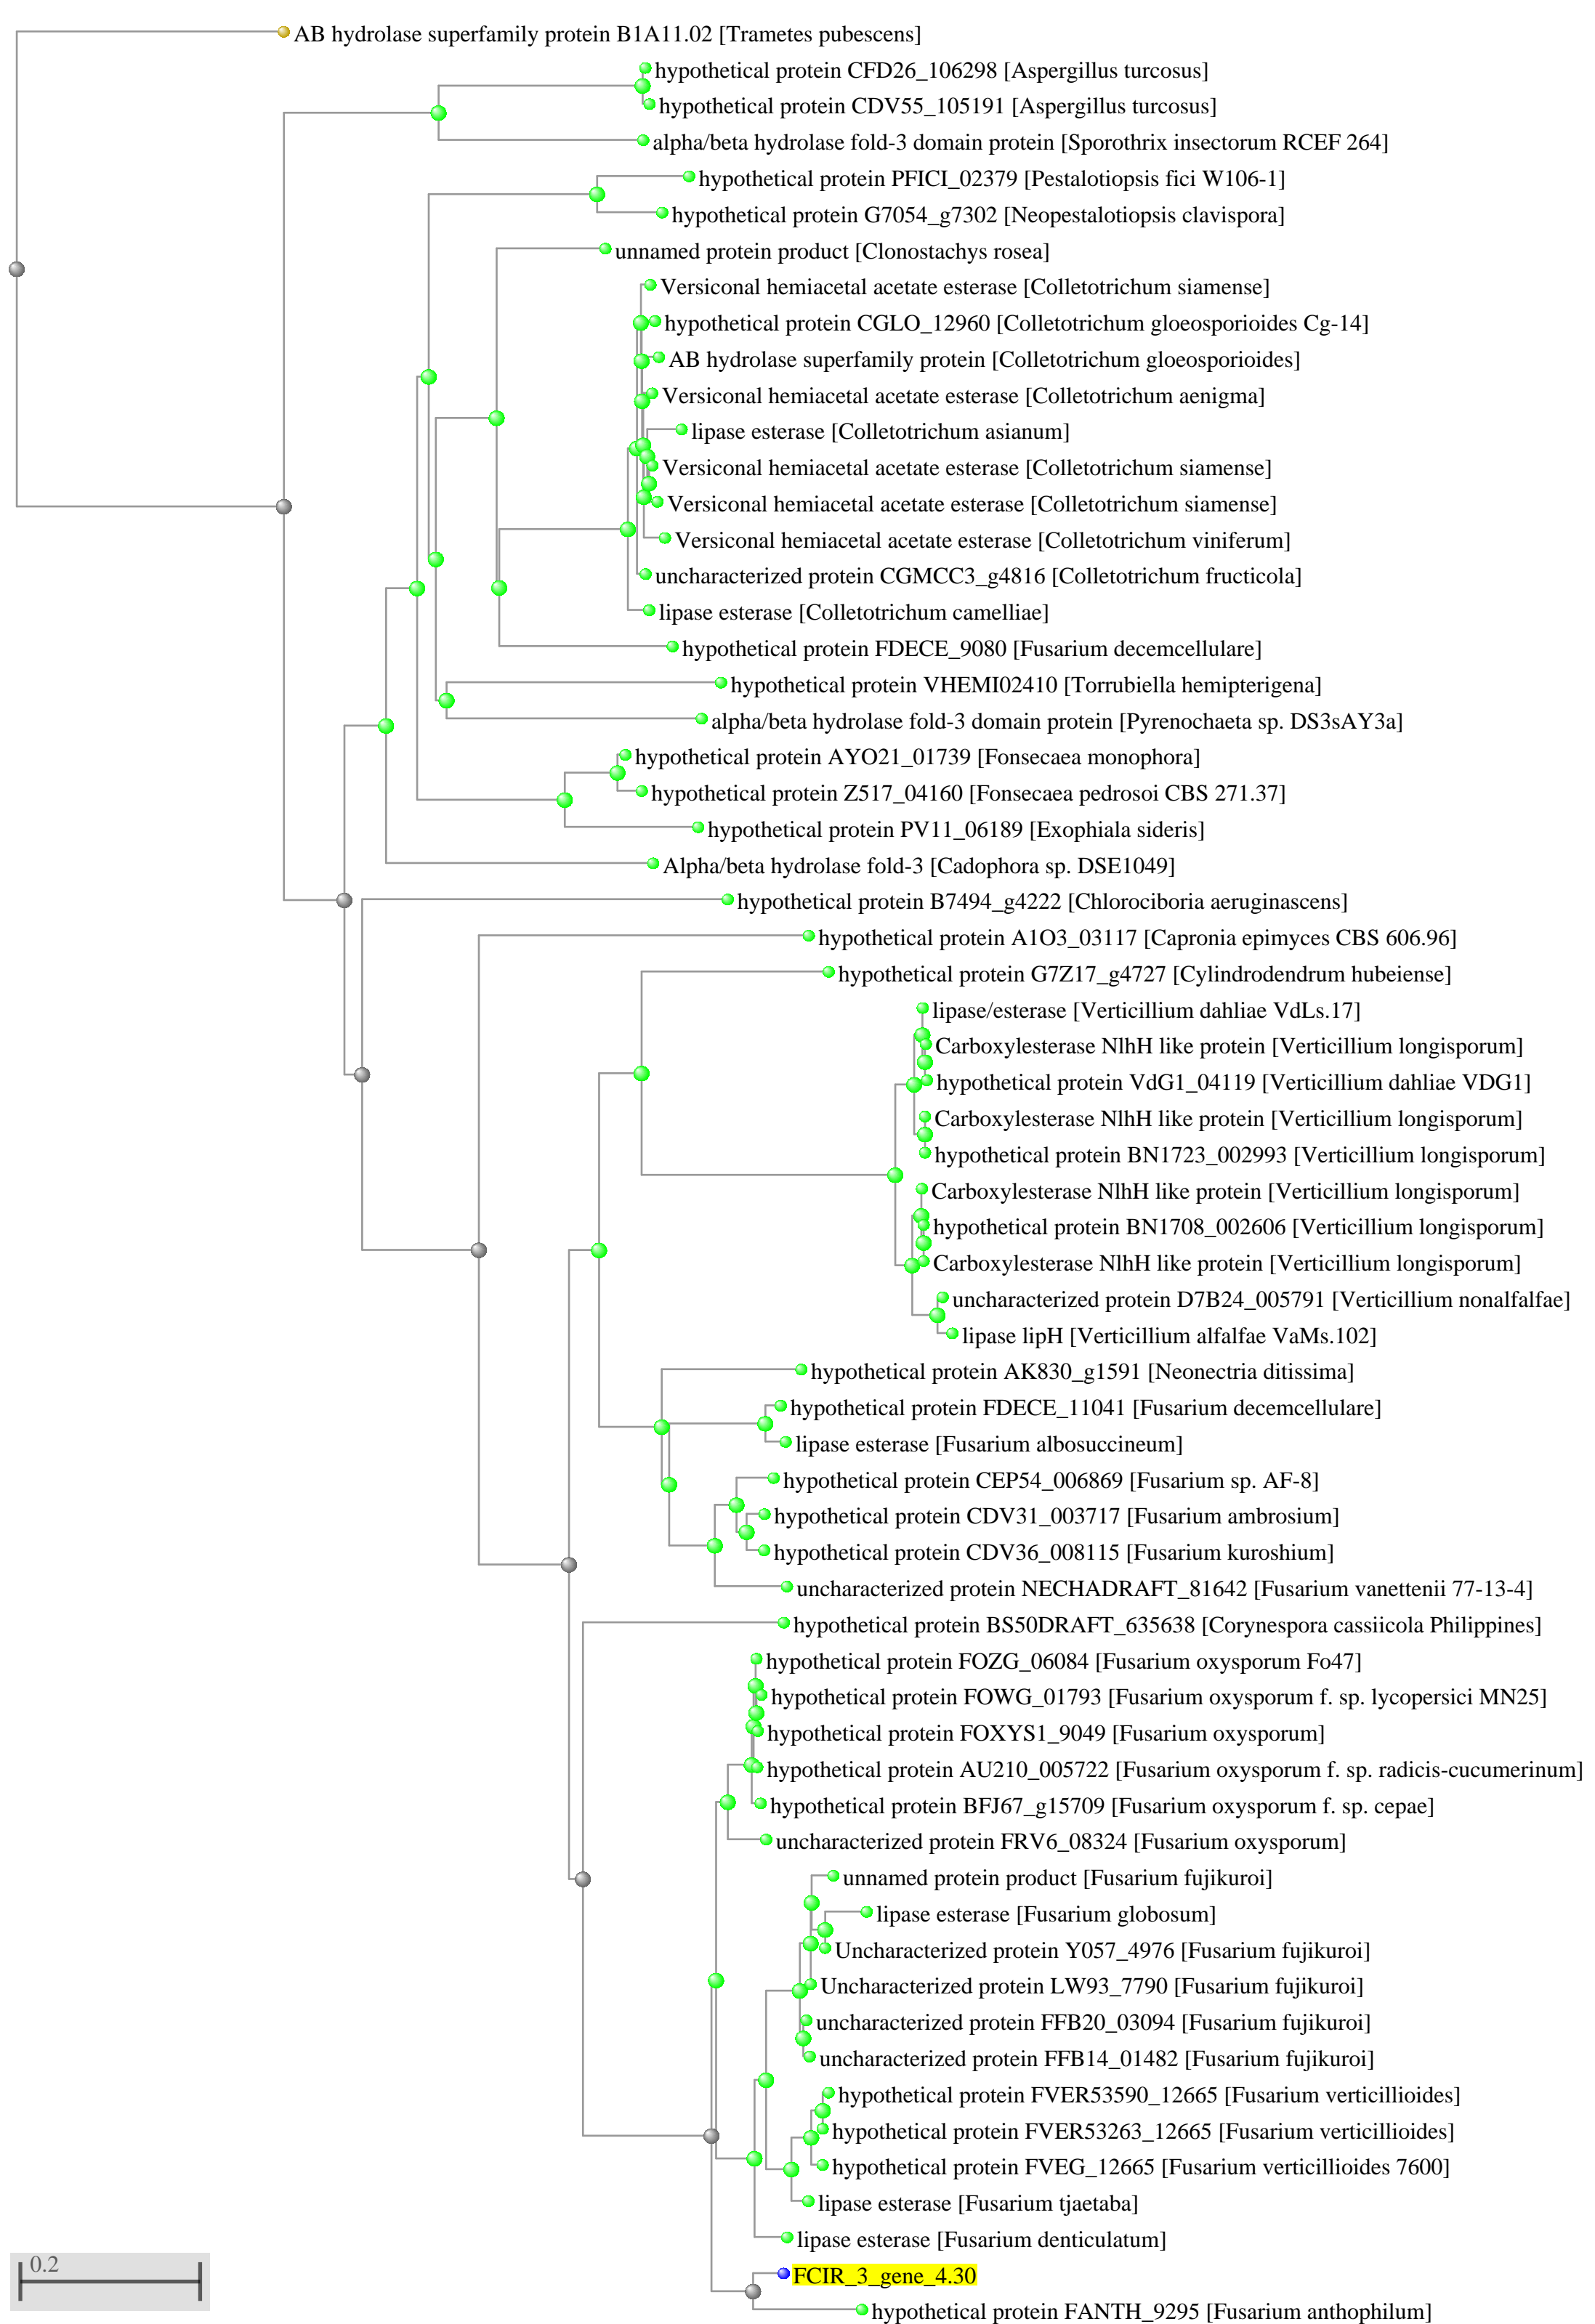



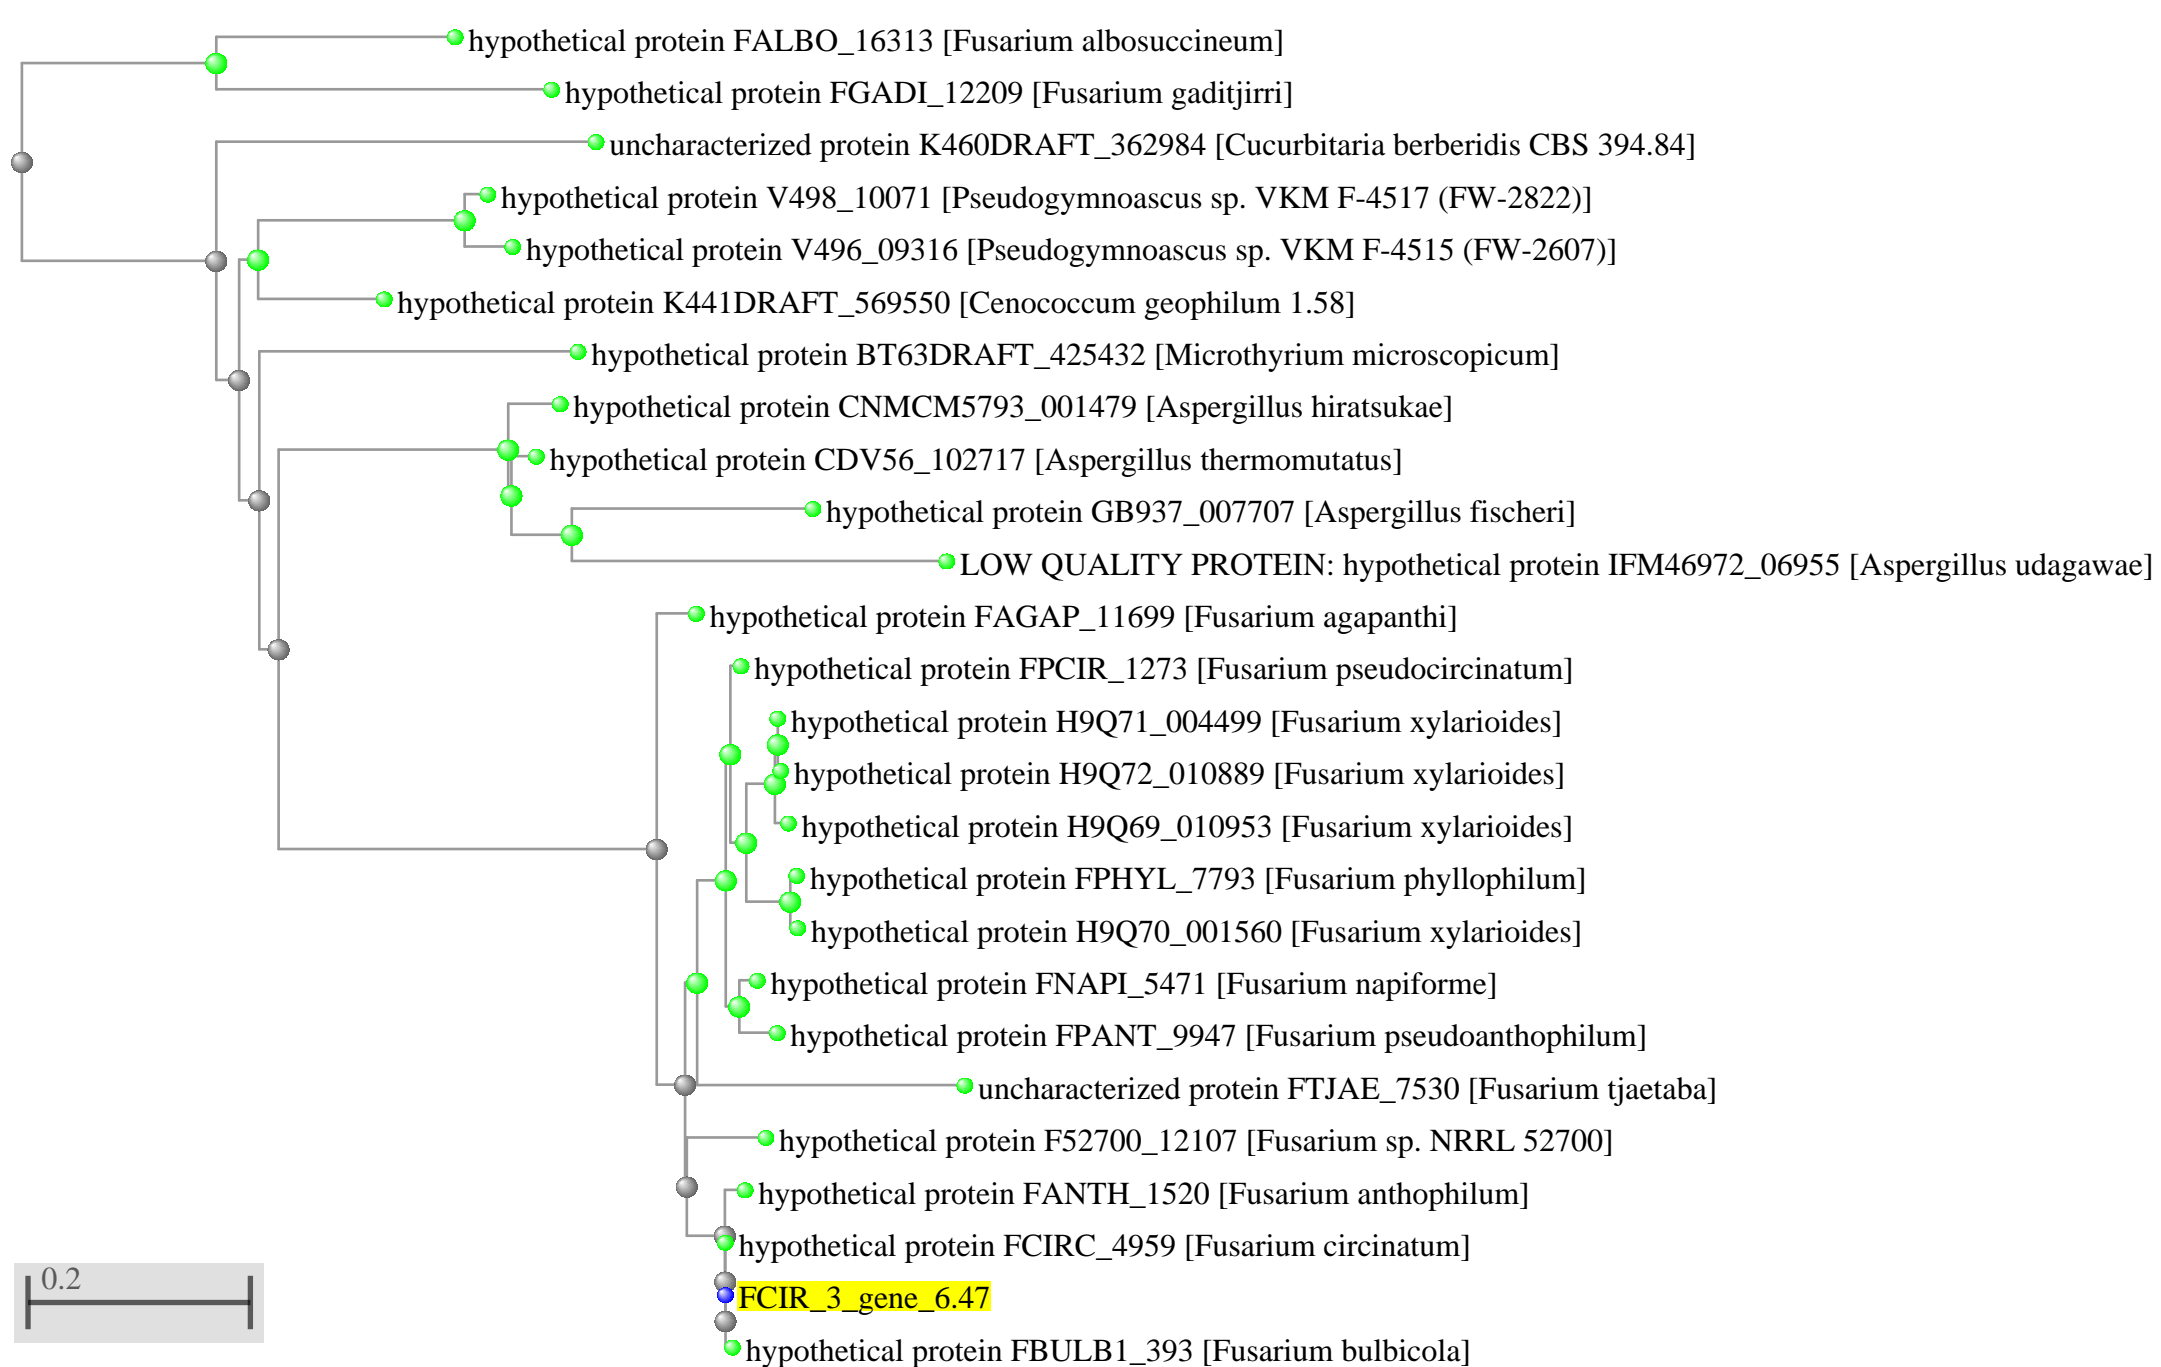



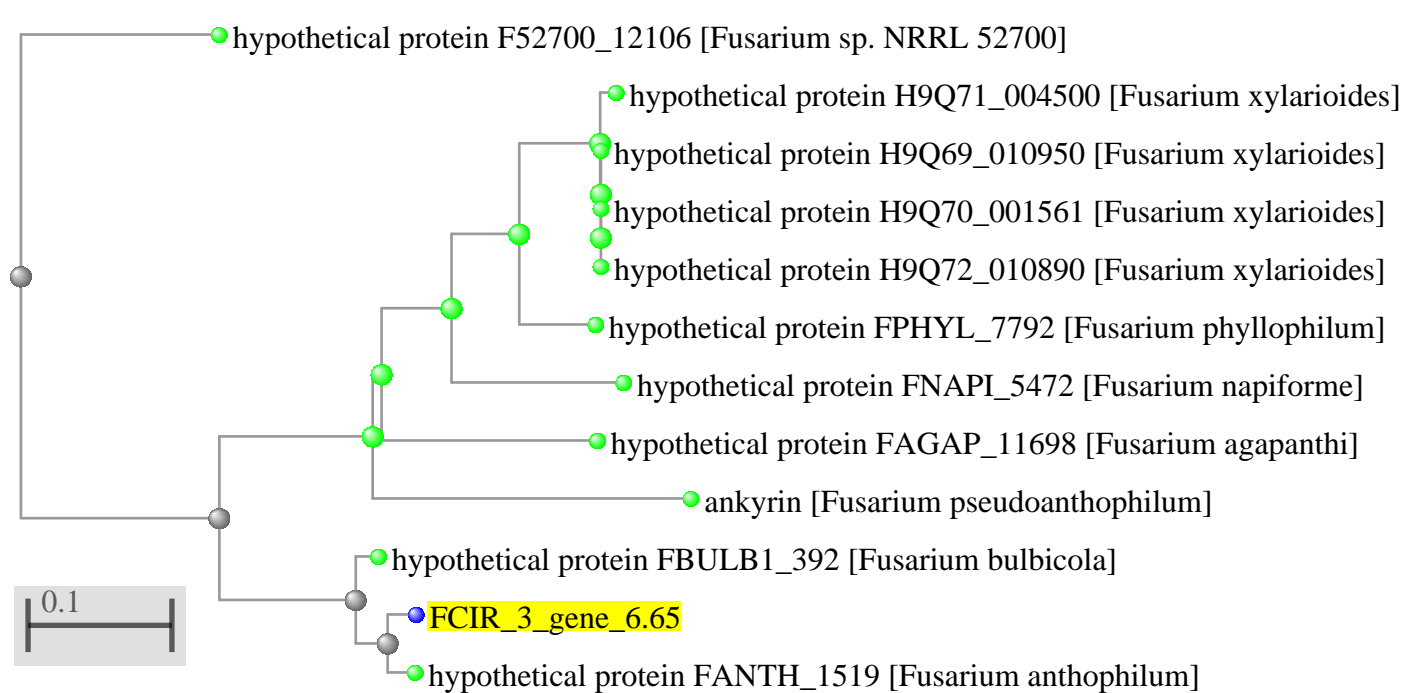

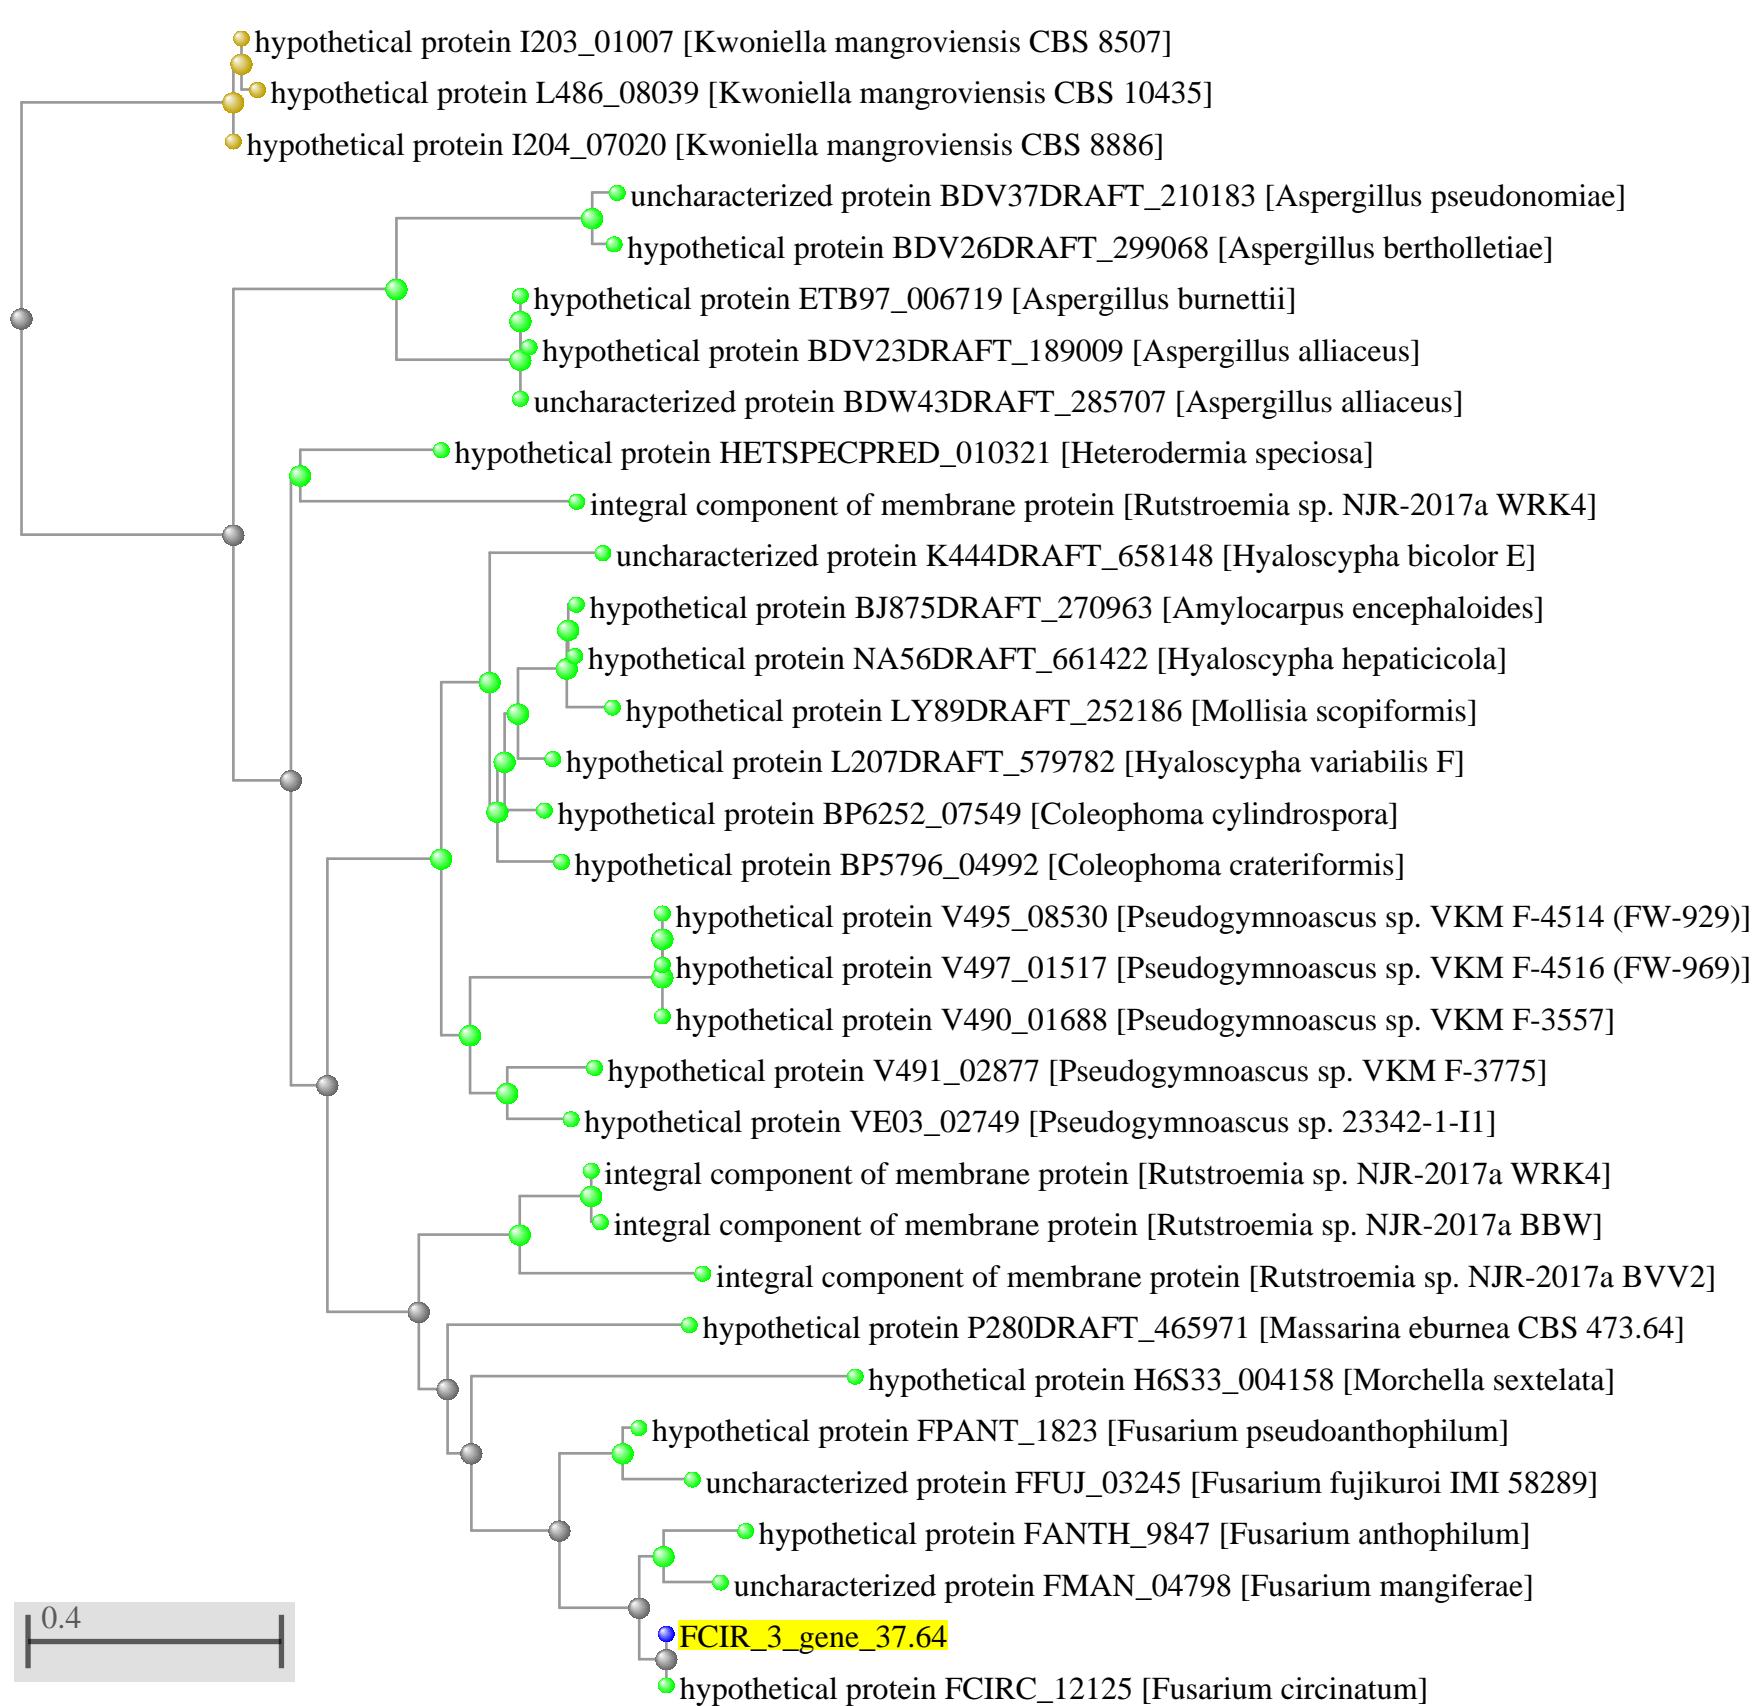

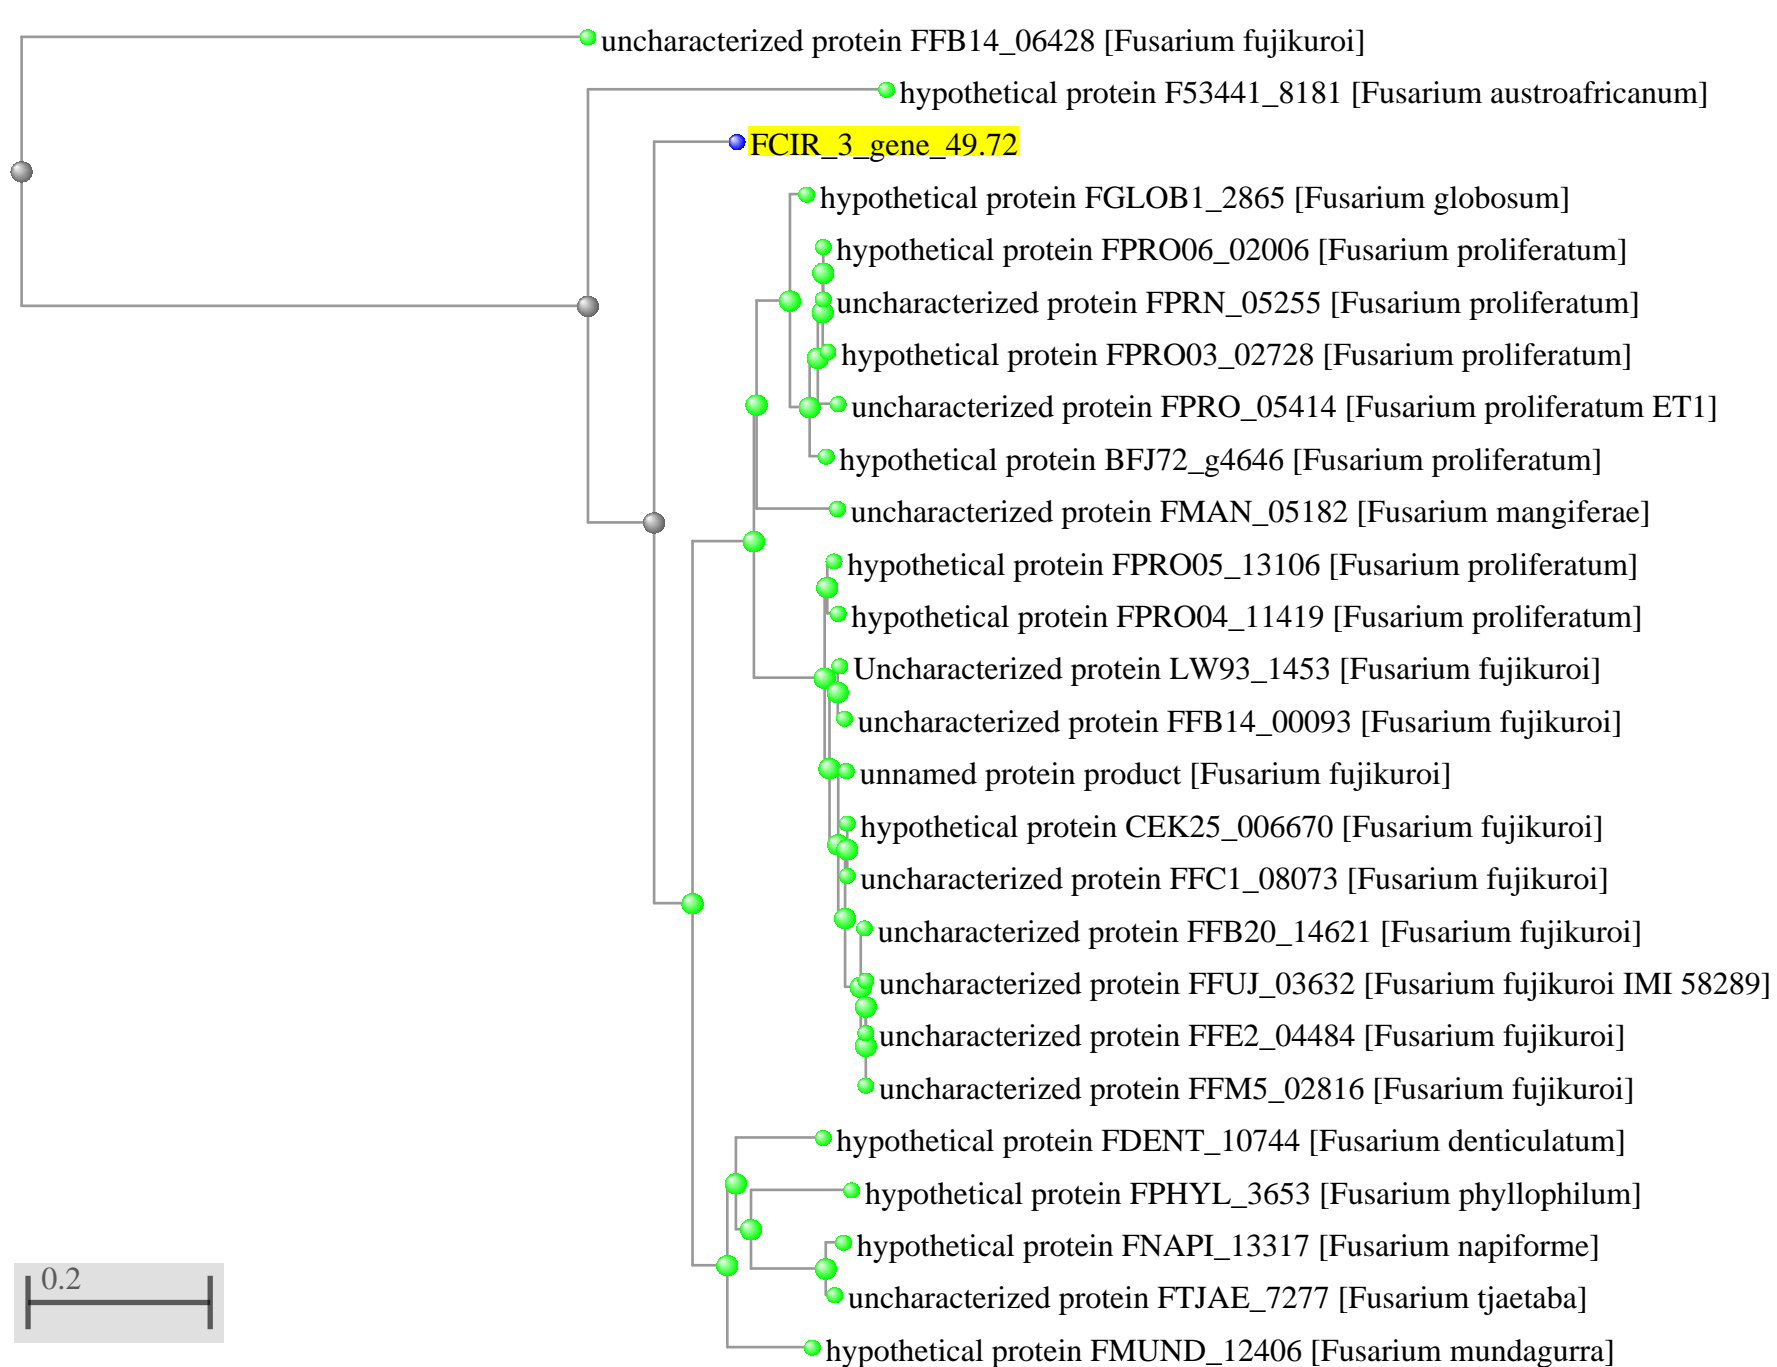

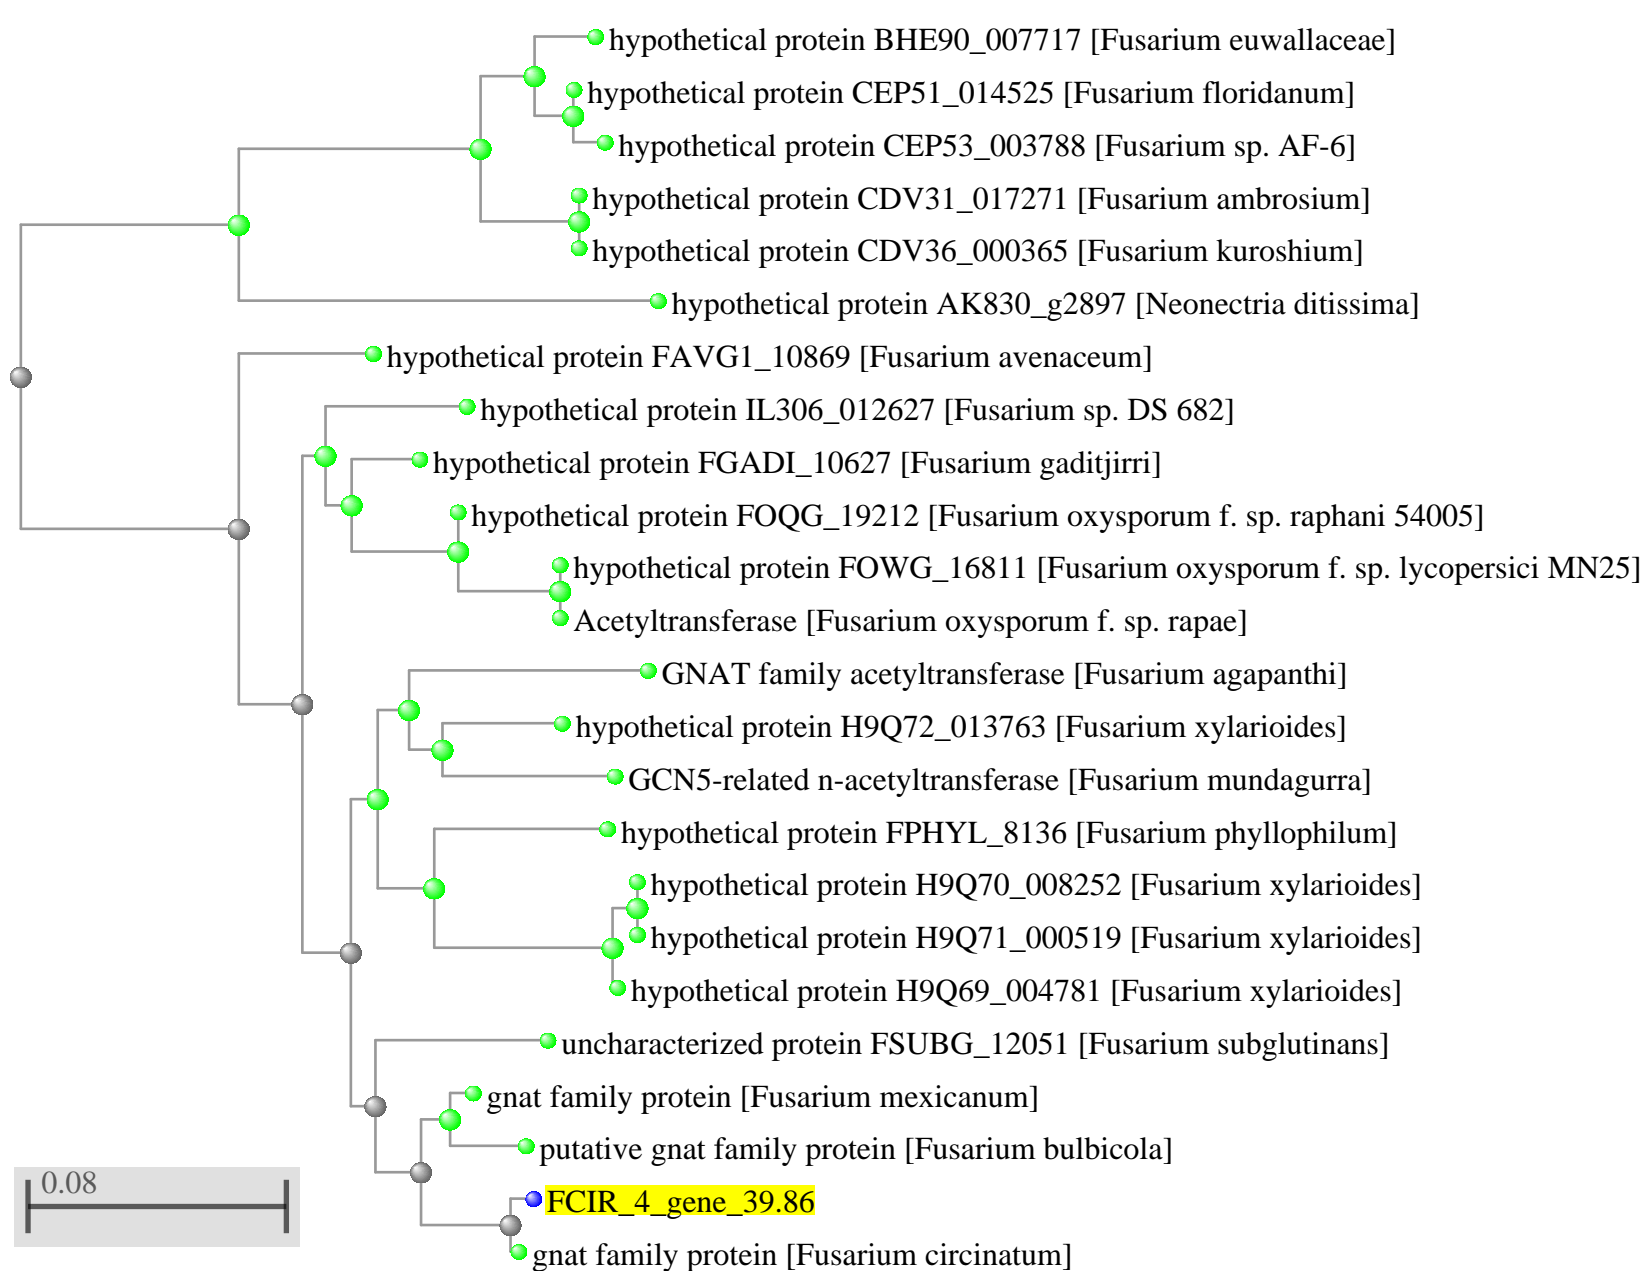

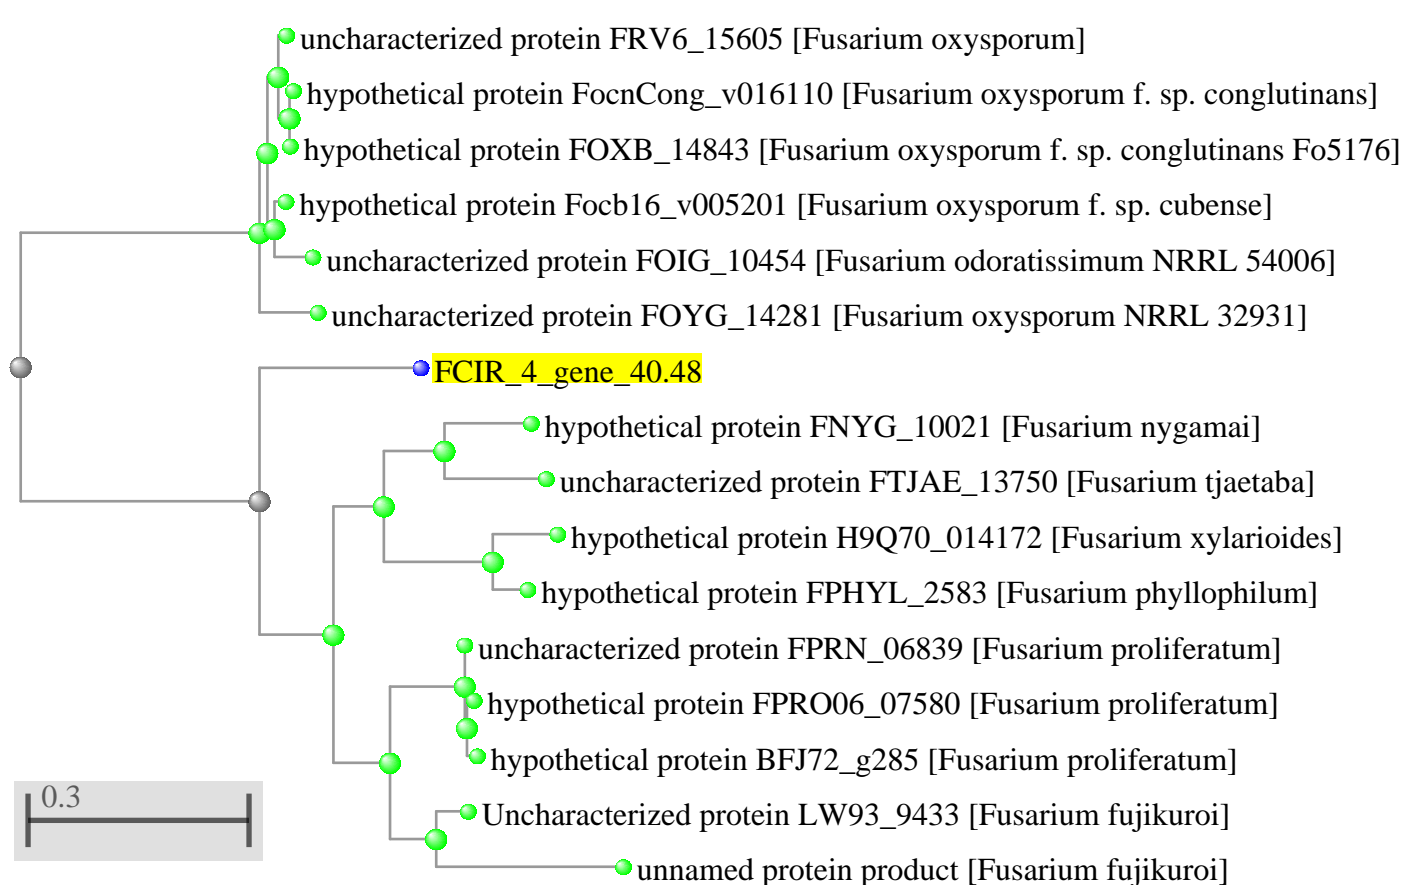

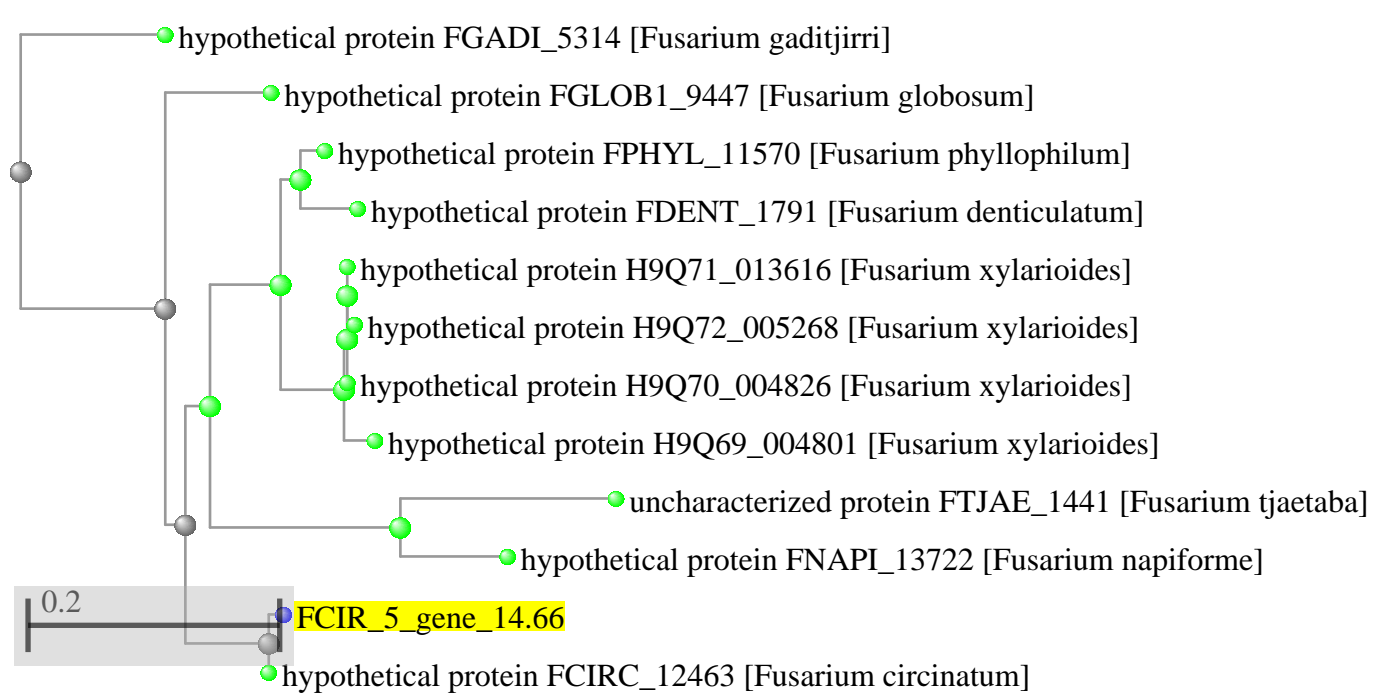

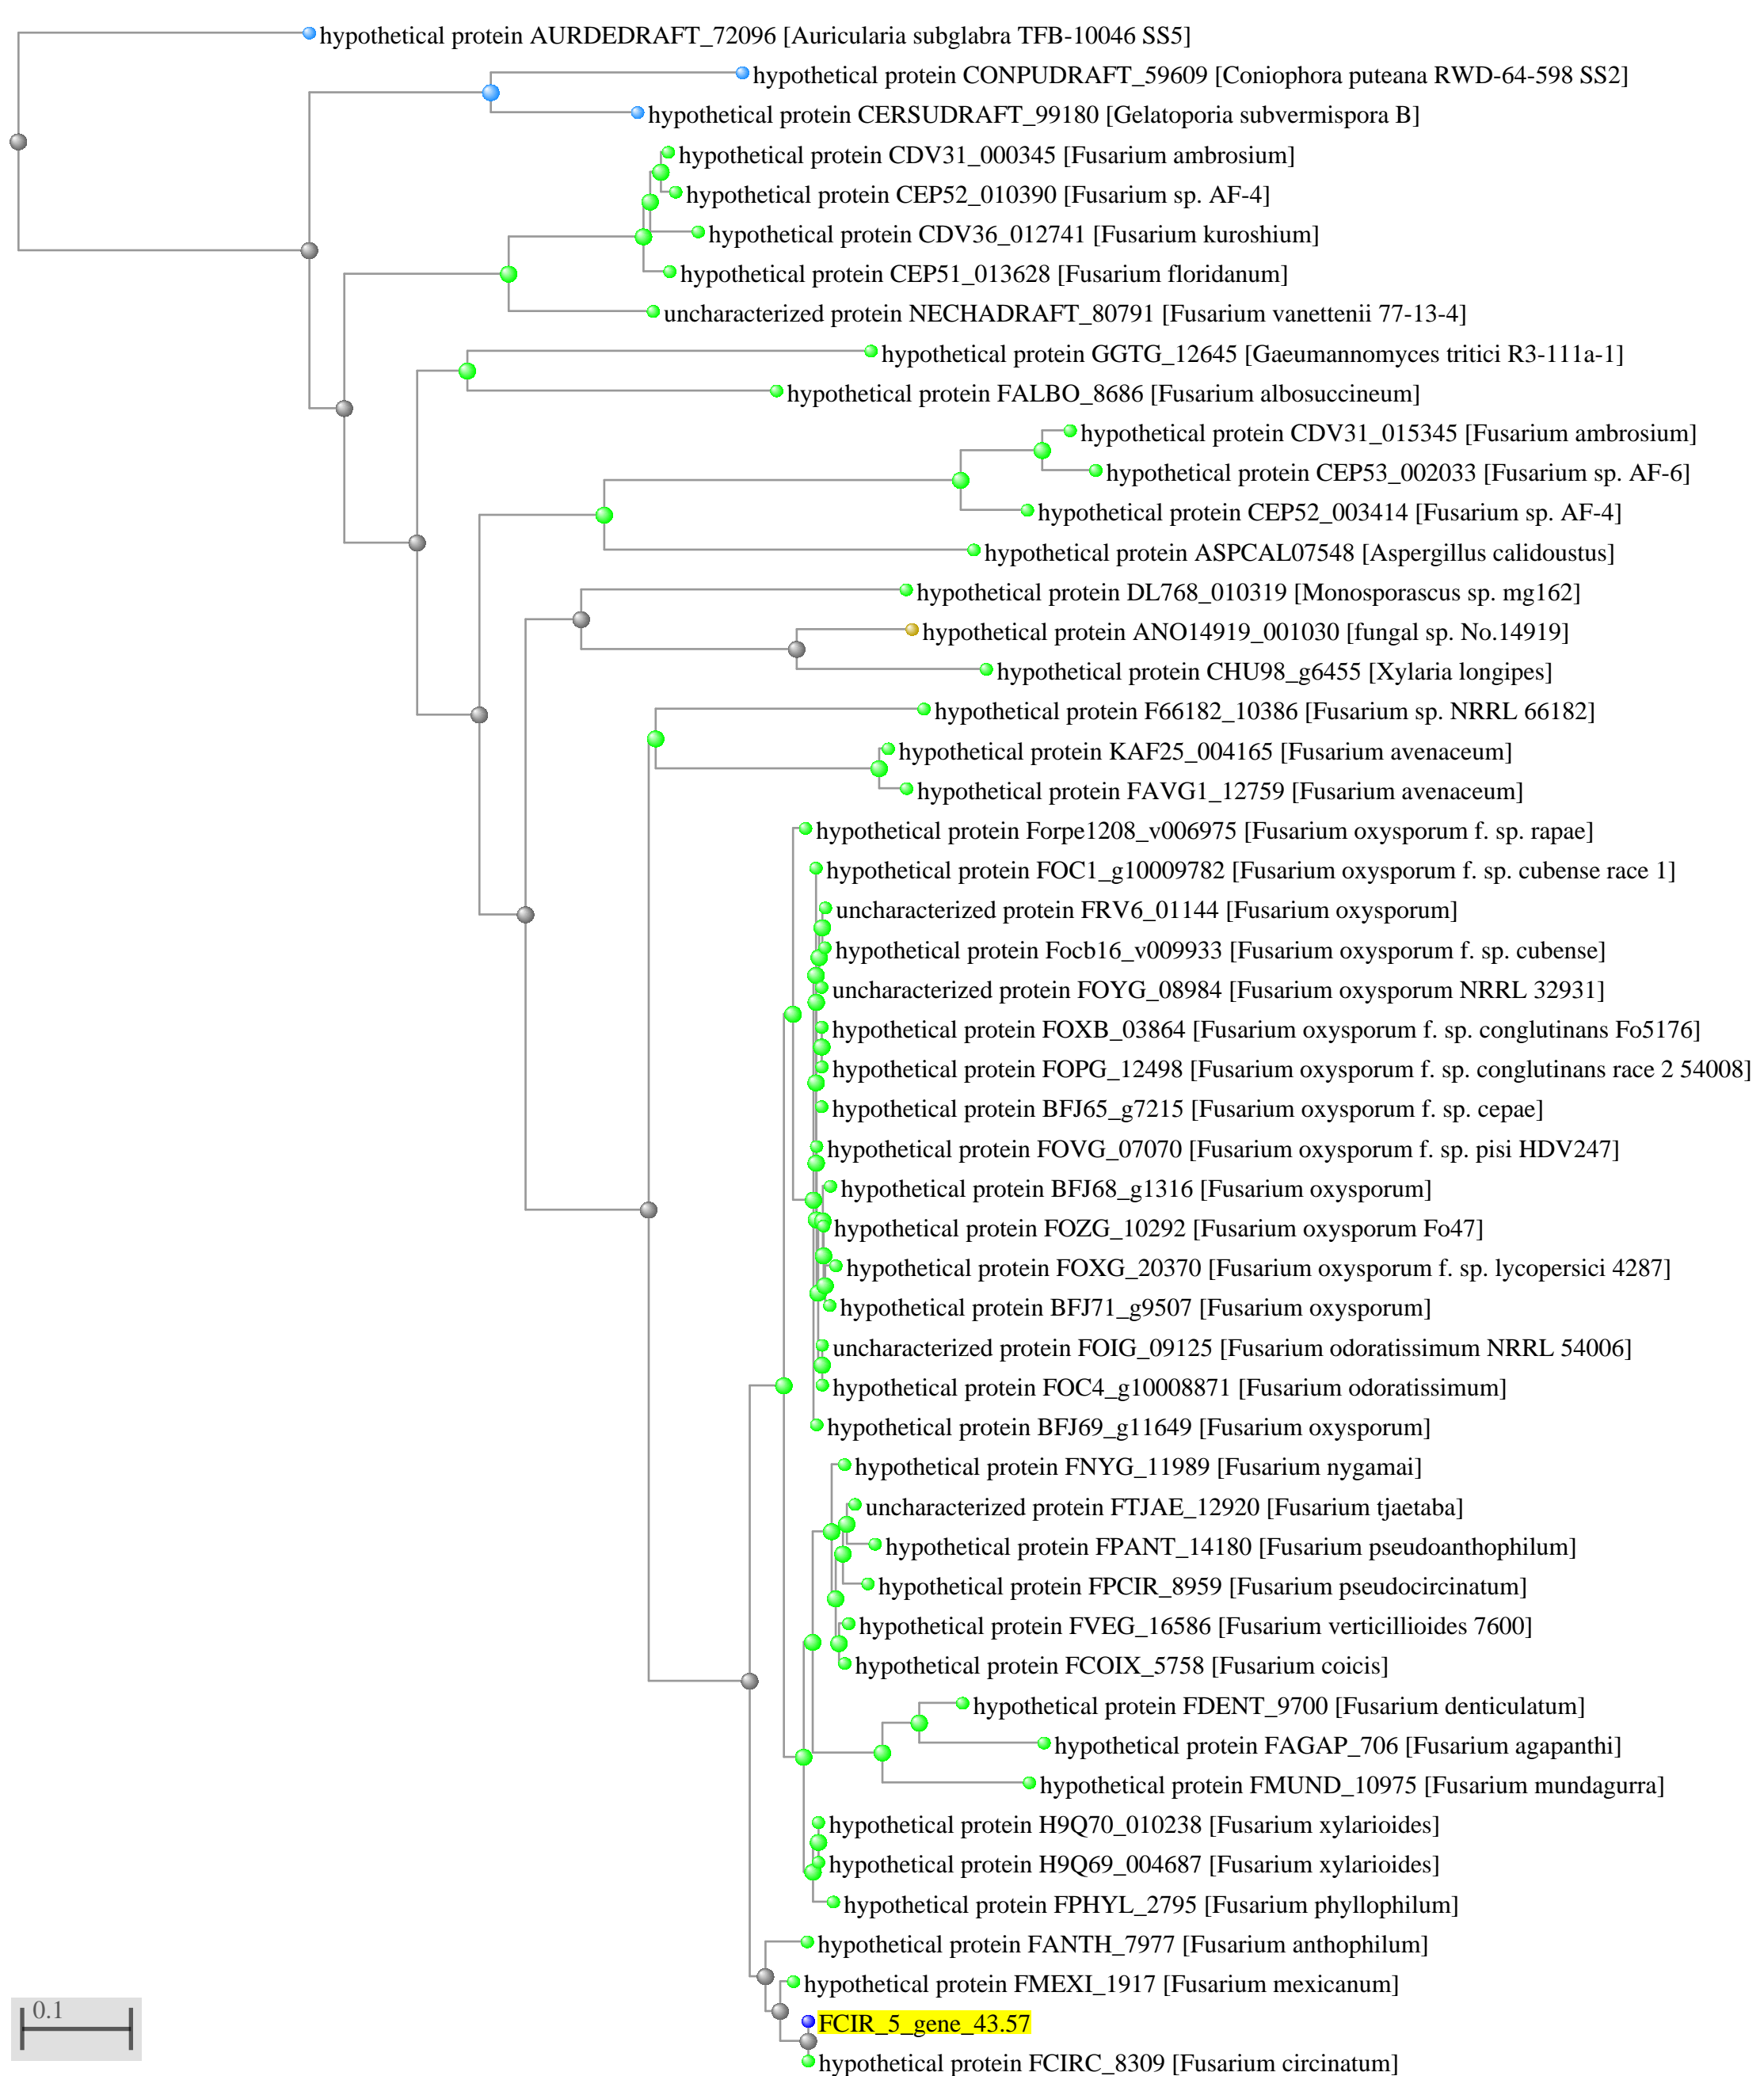



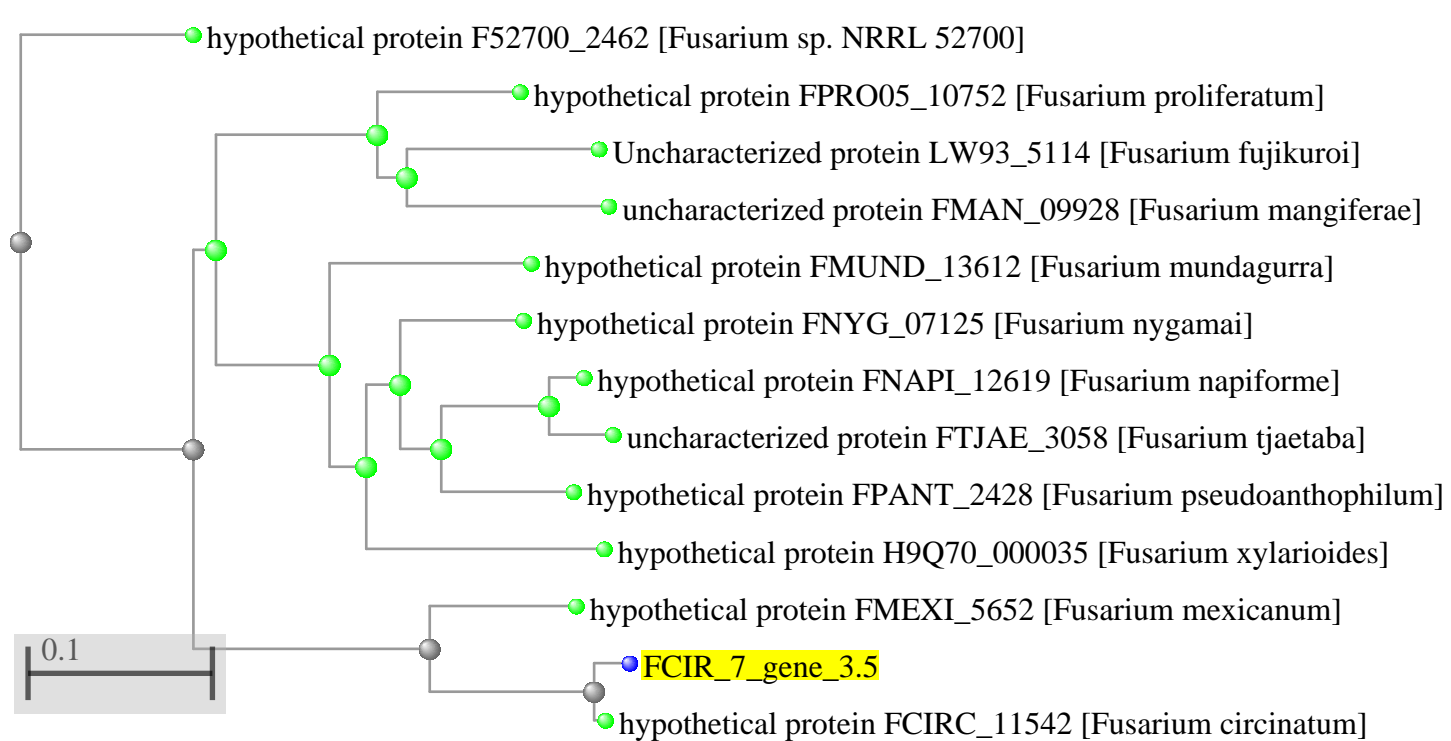

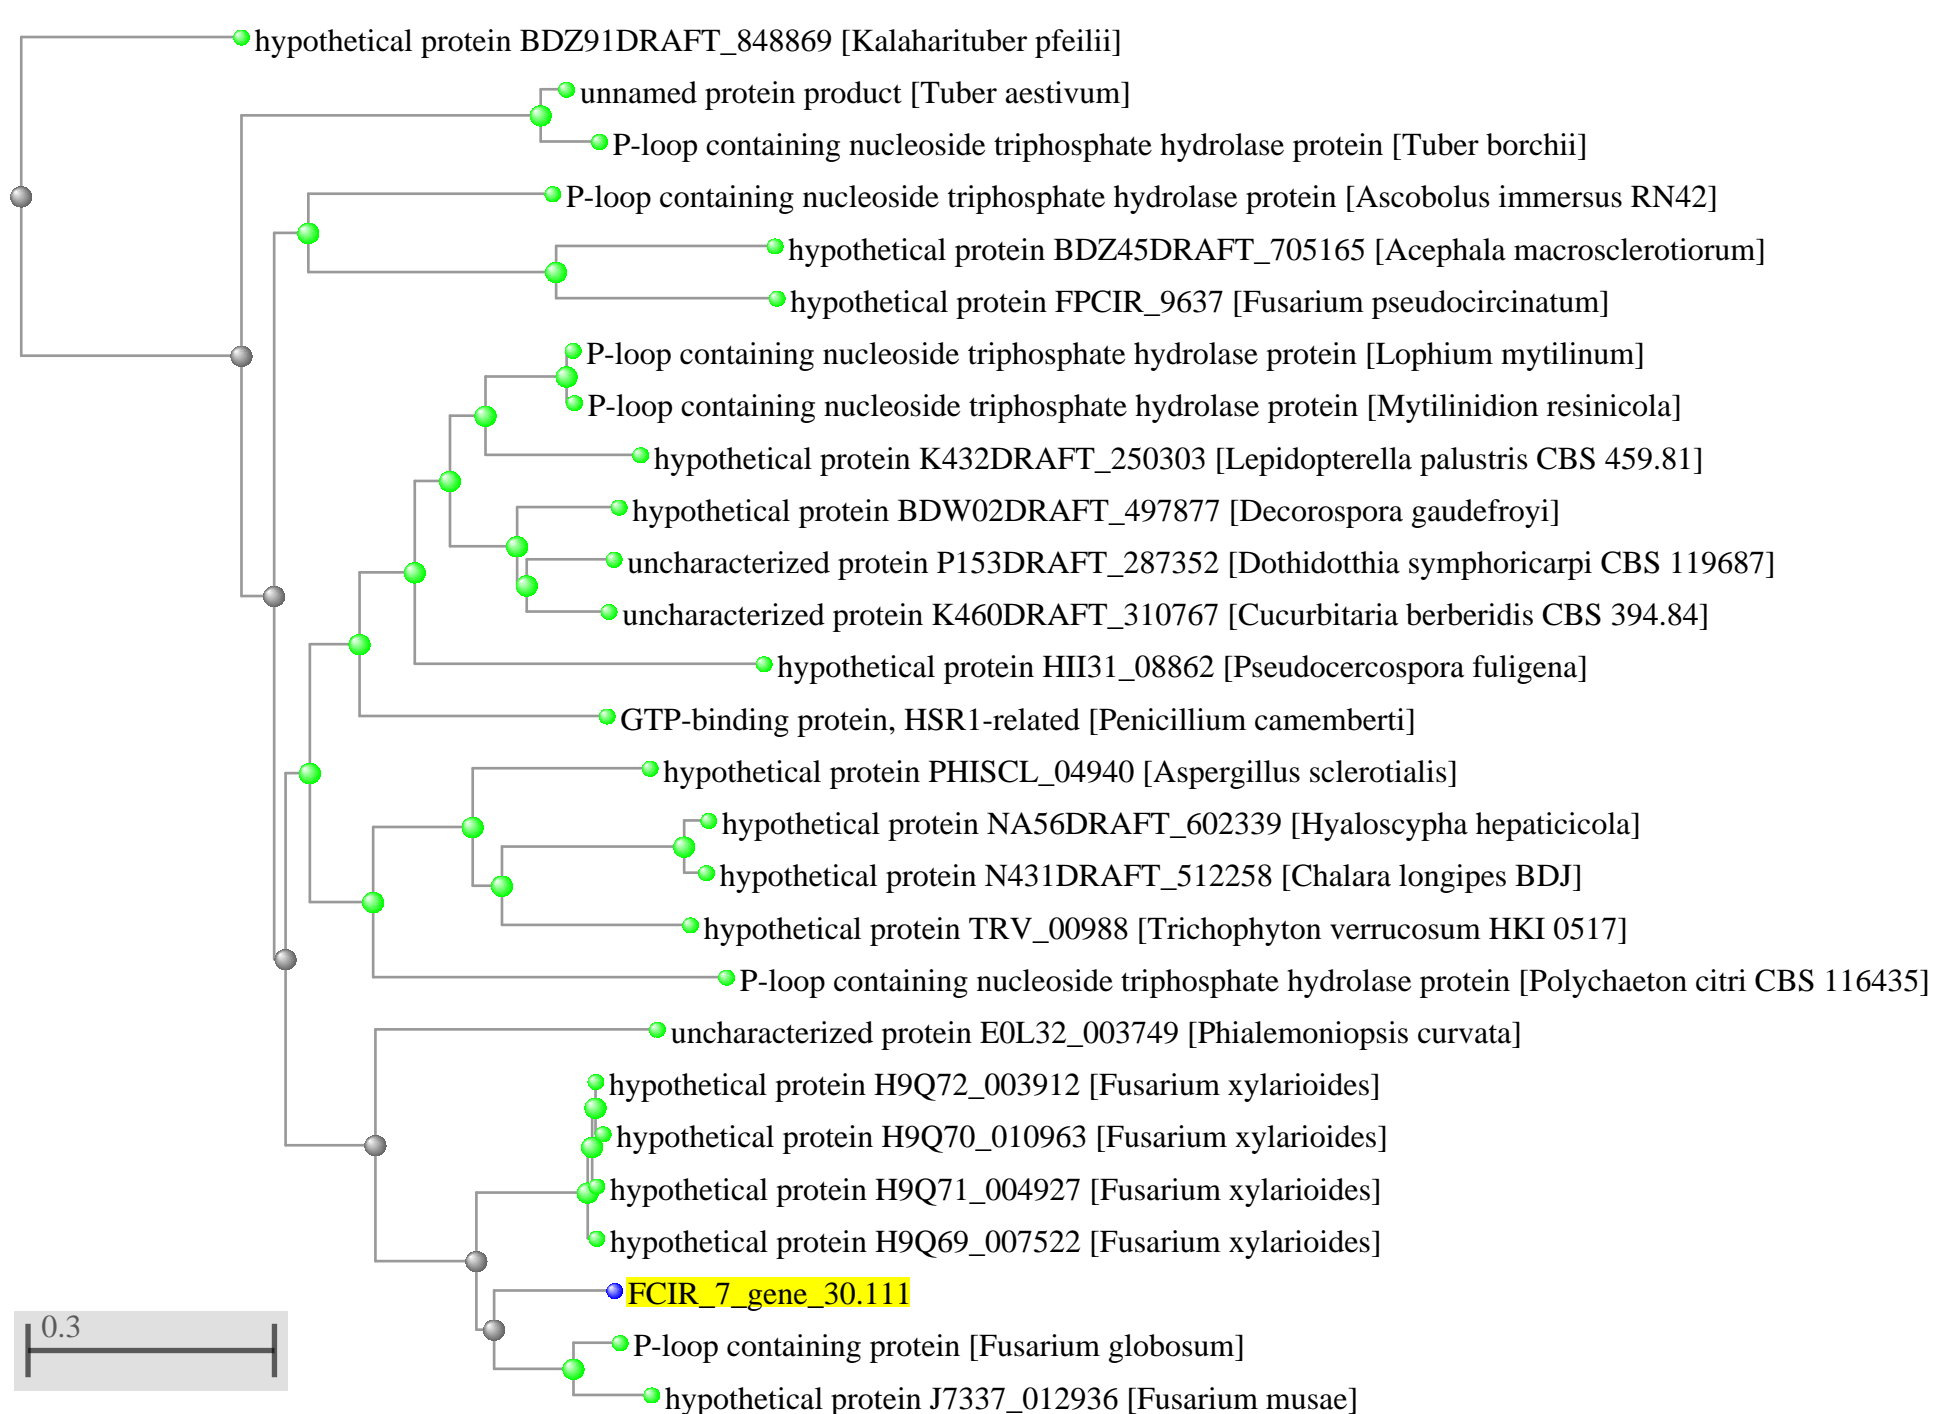

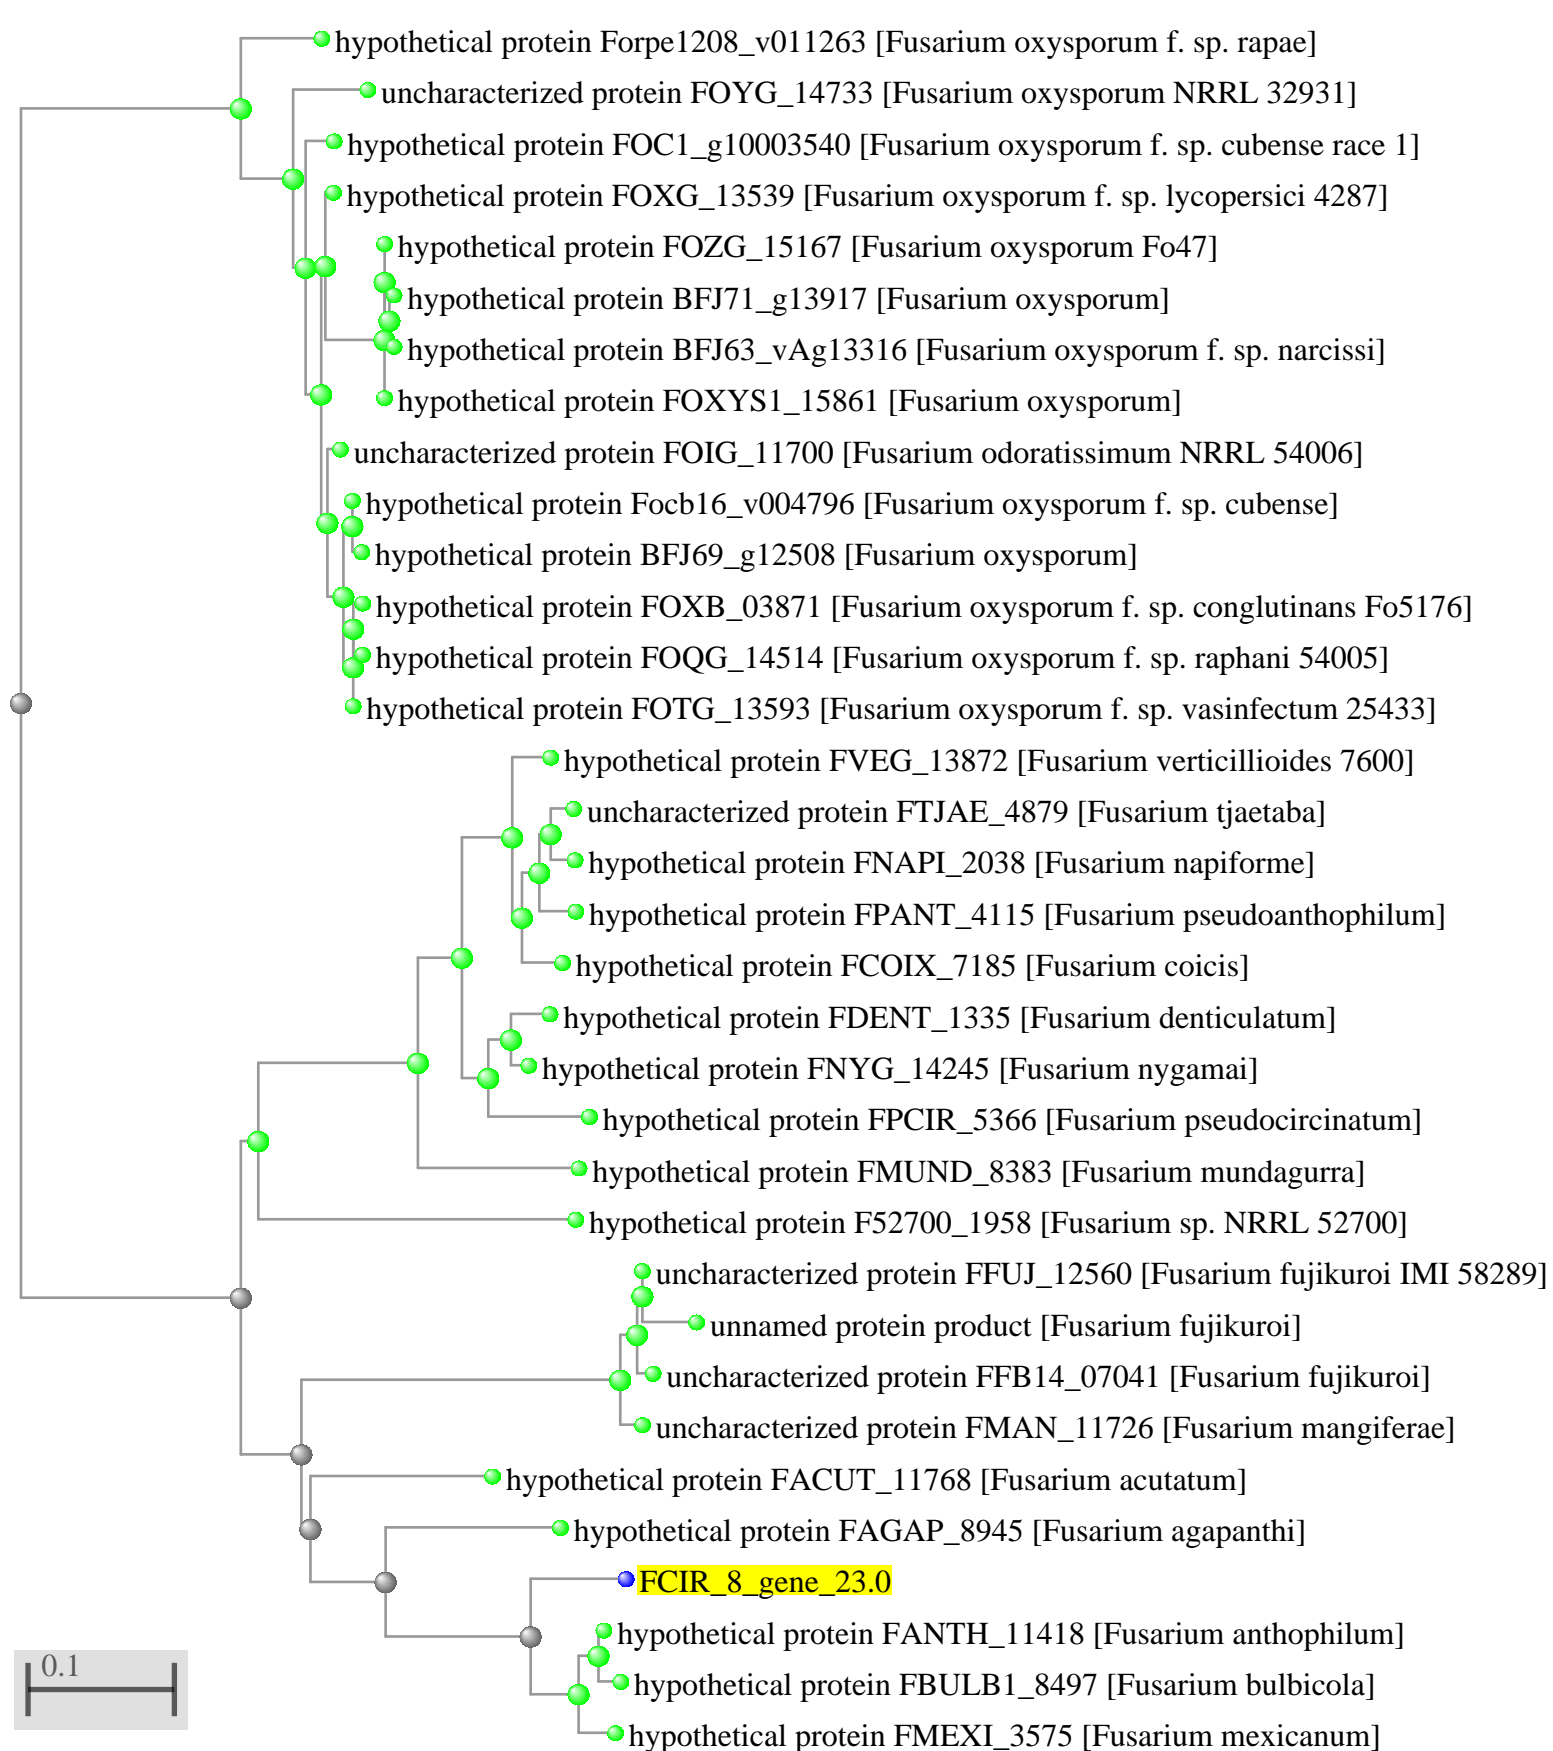

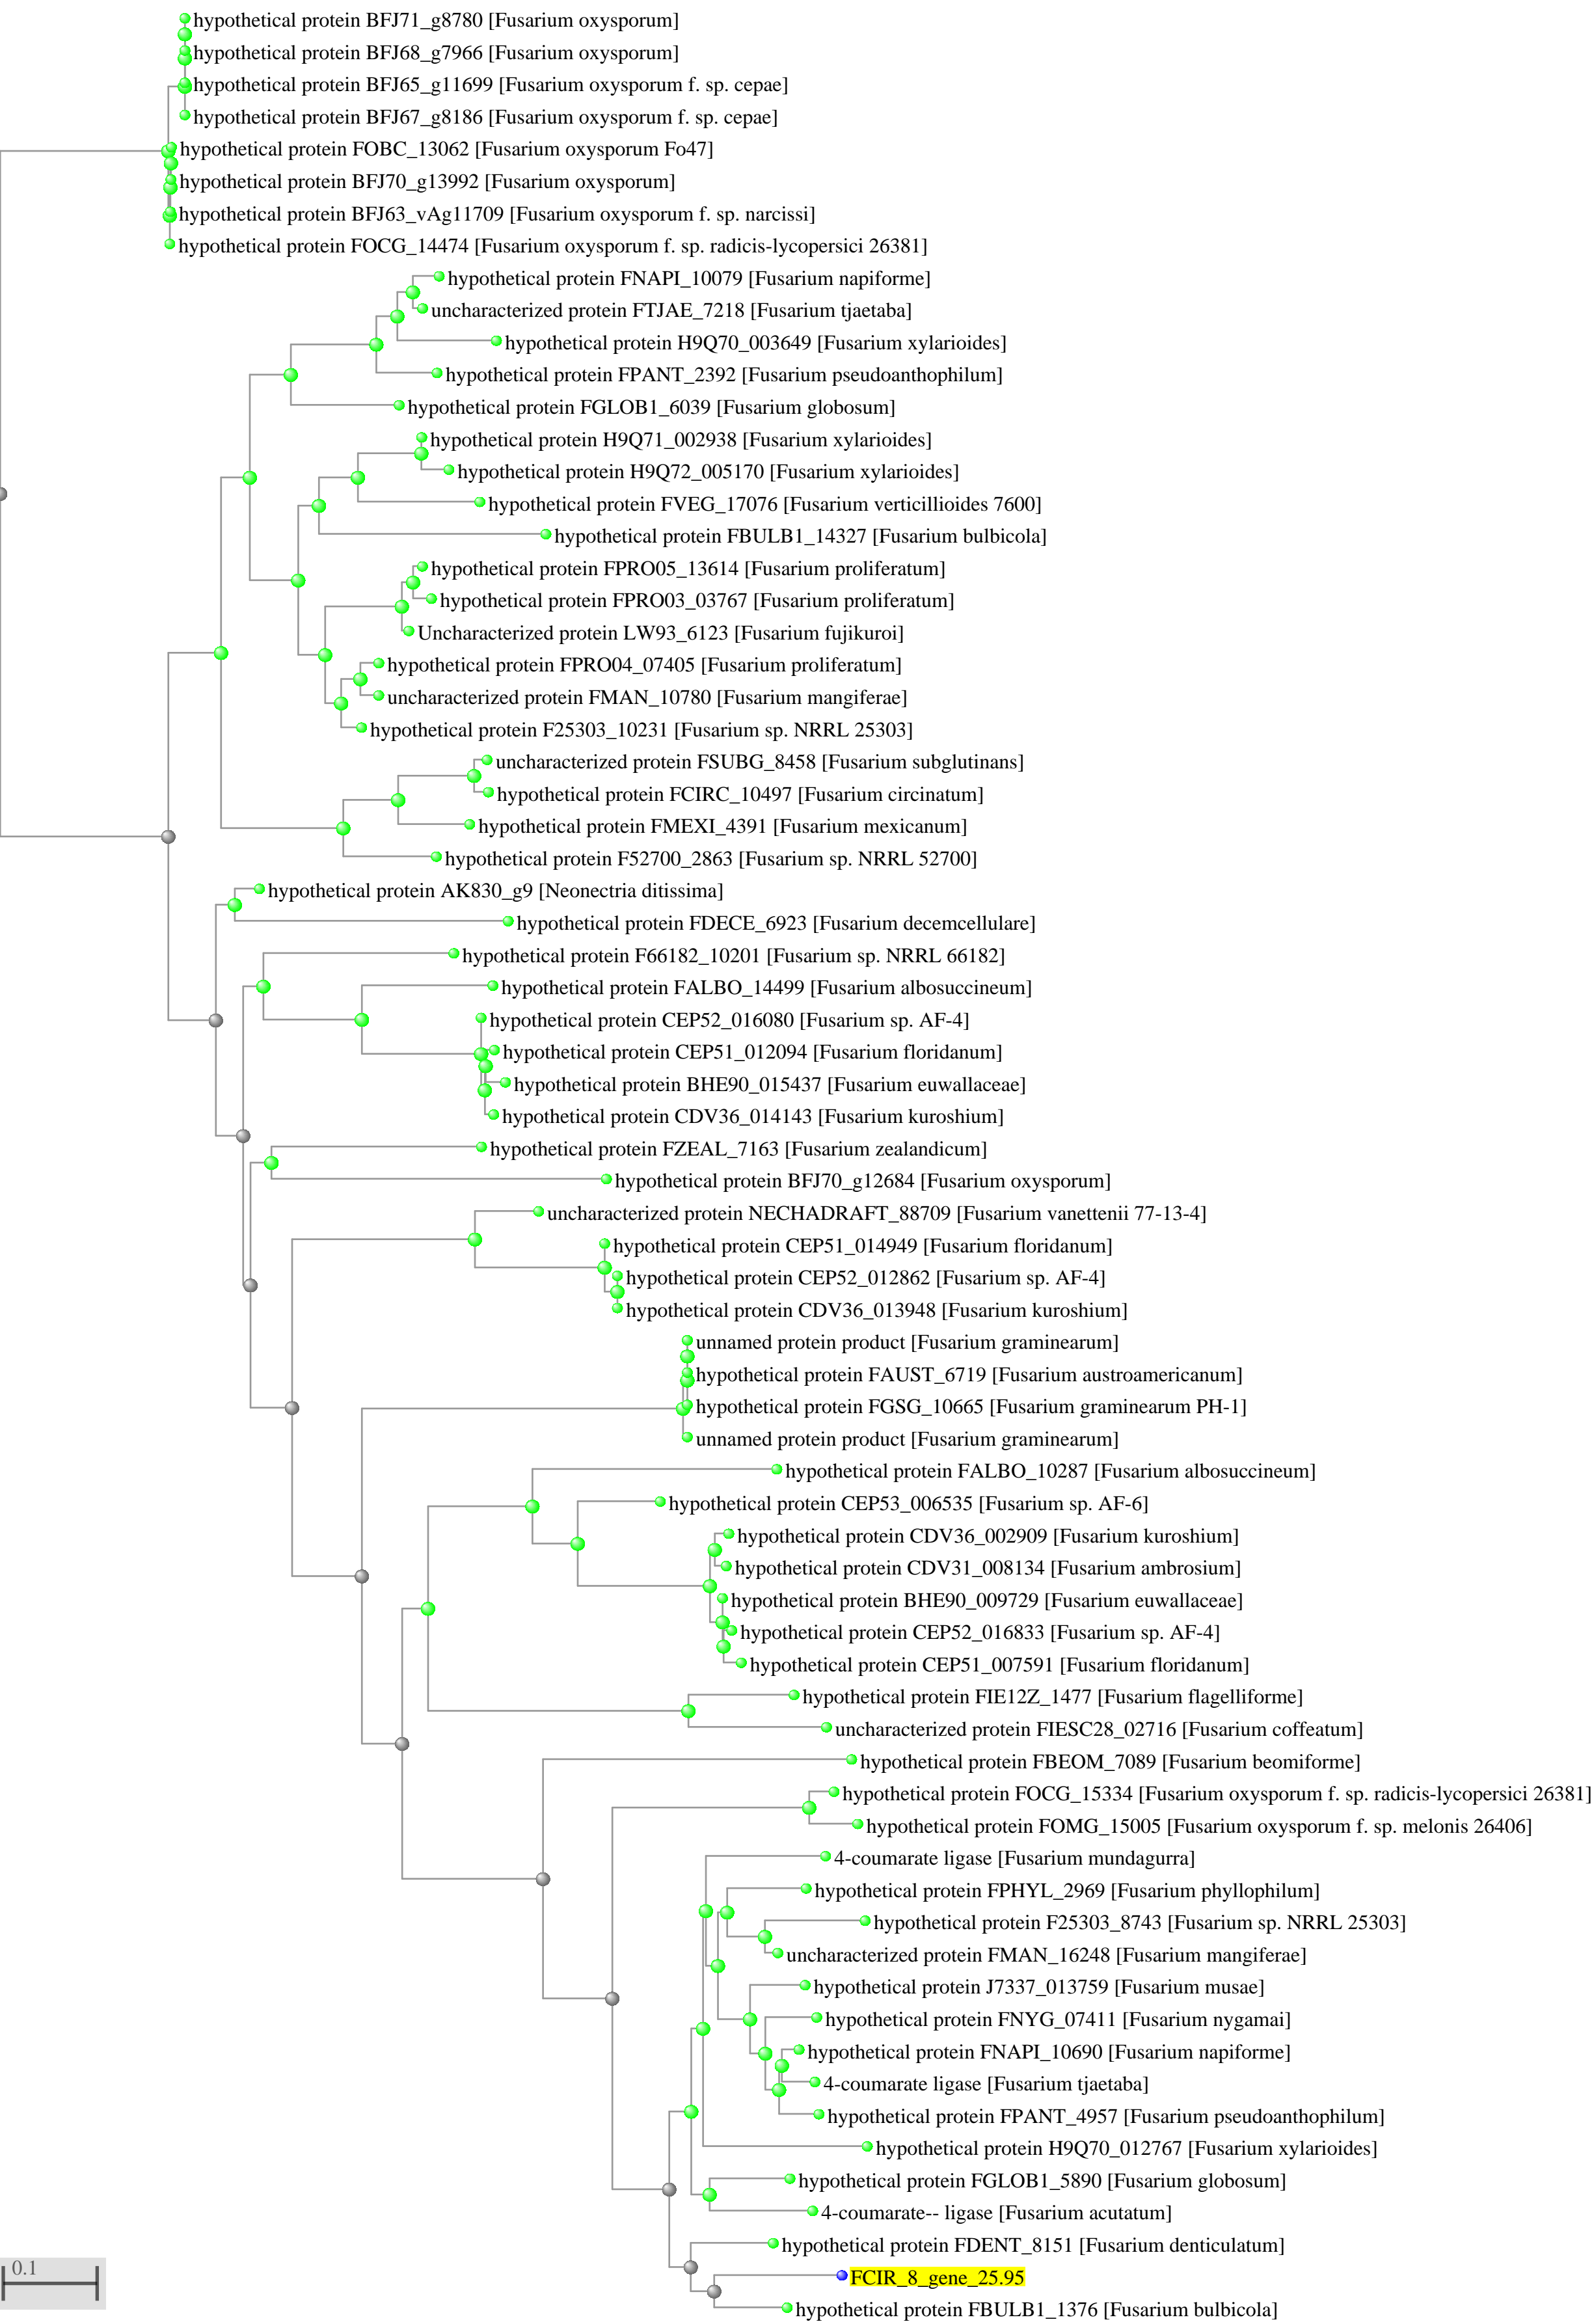

0.1



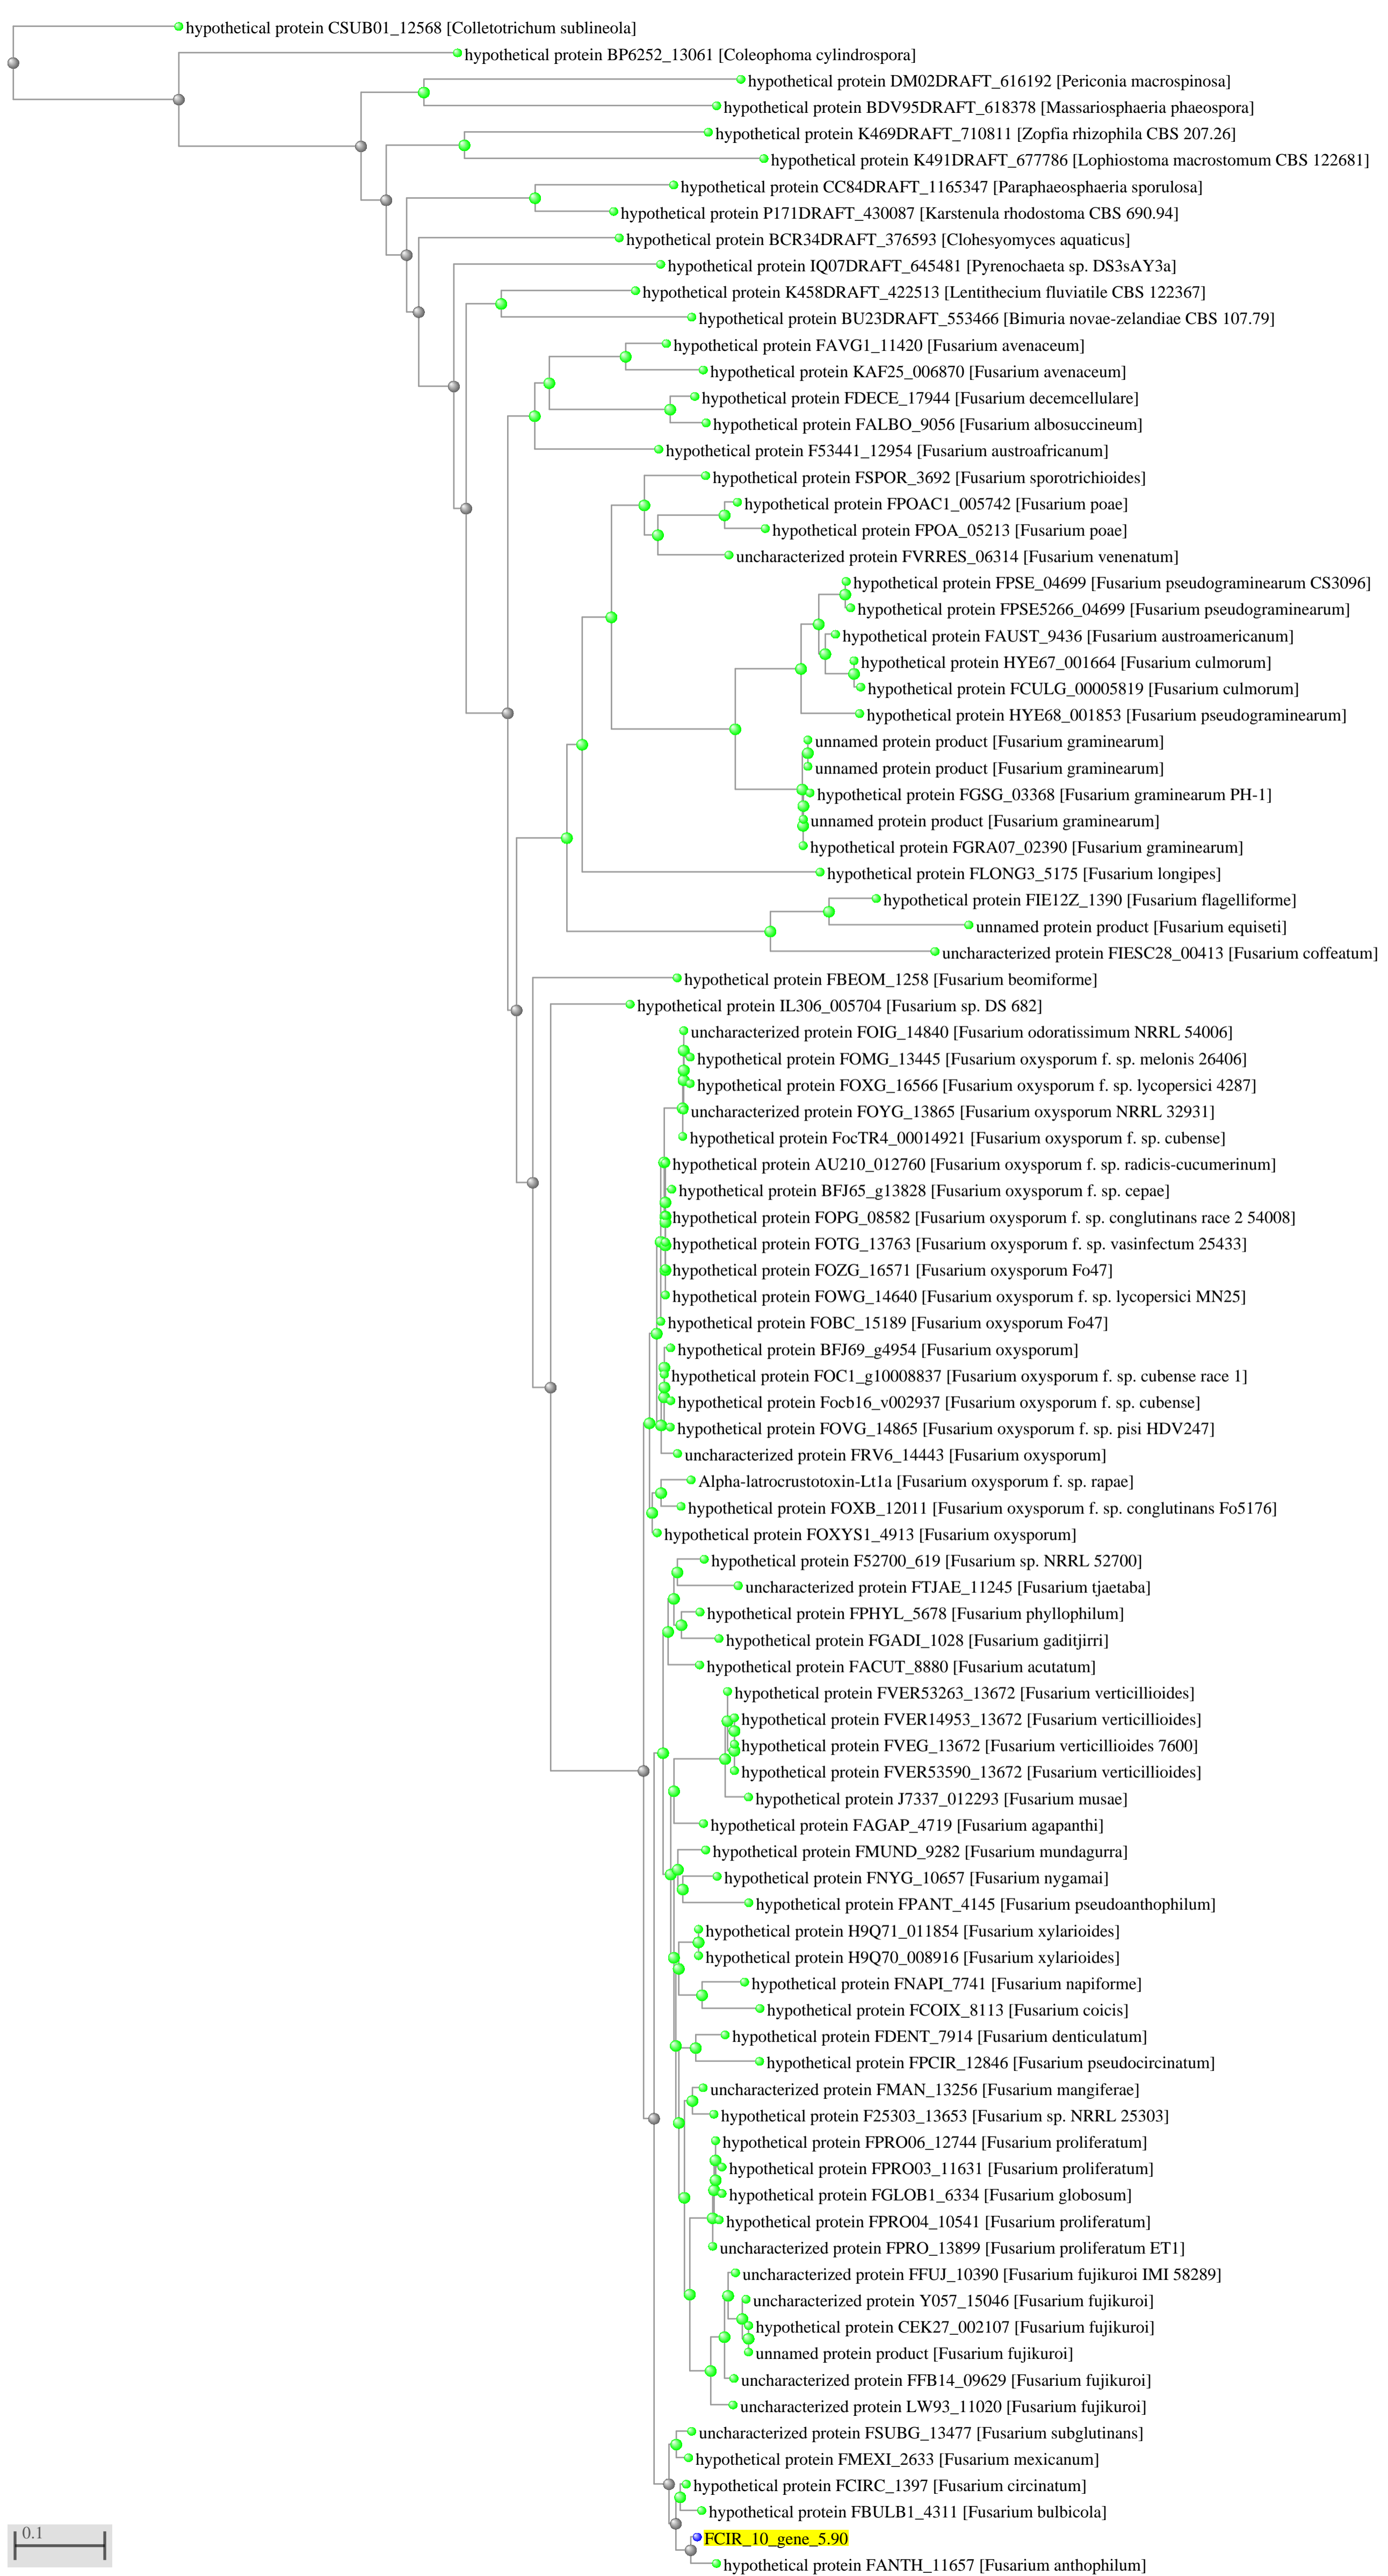

0.1

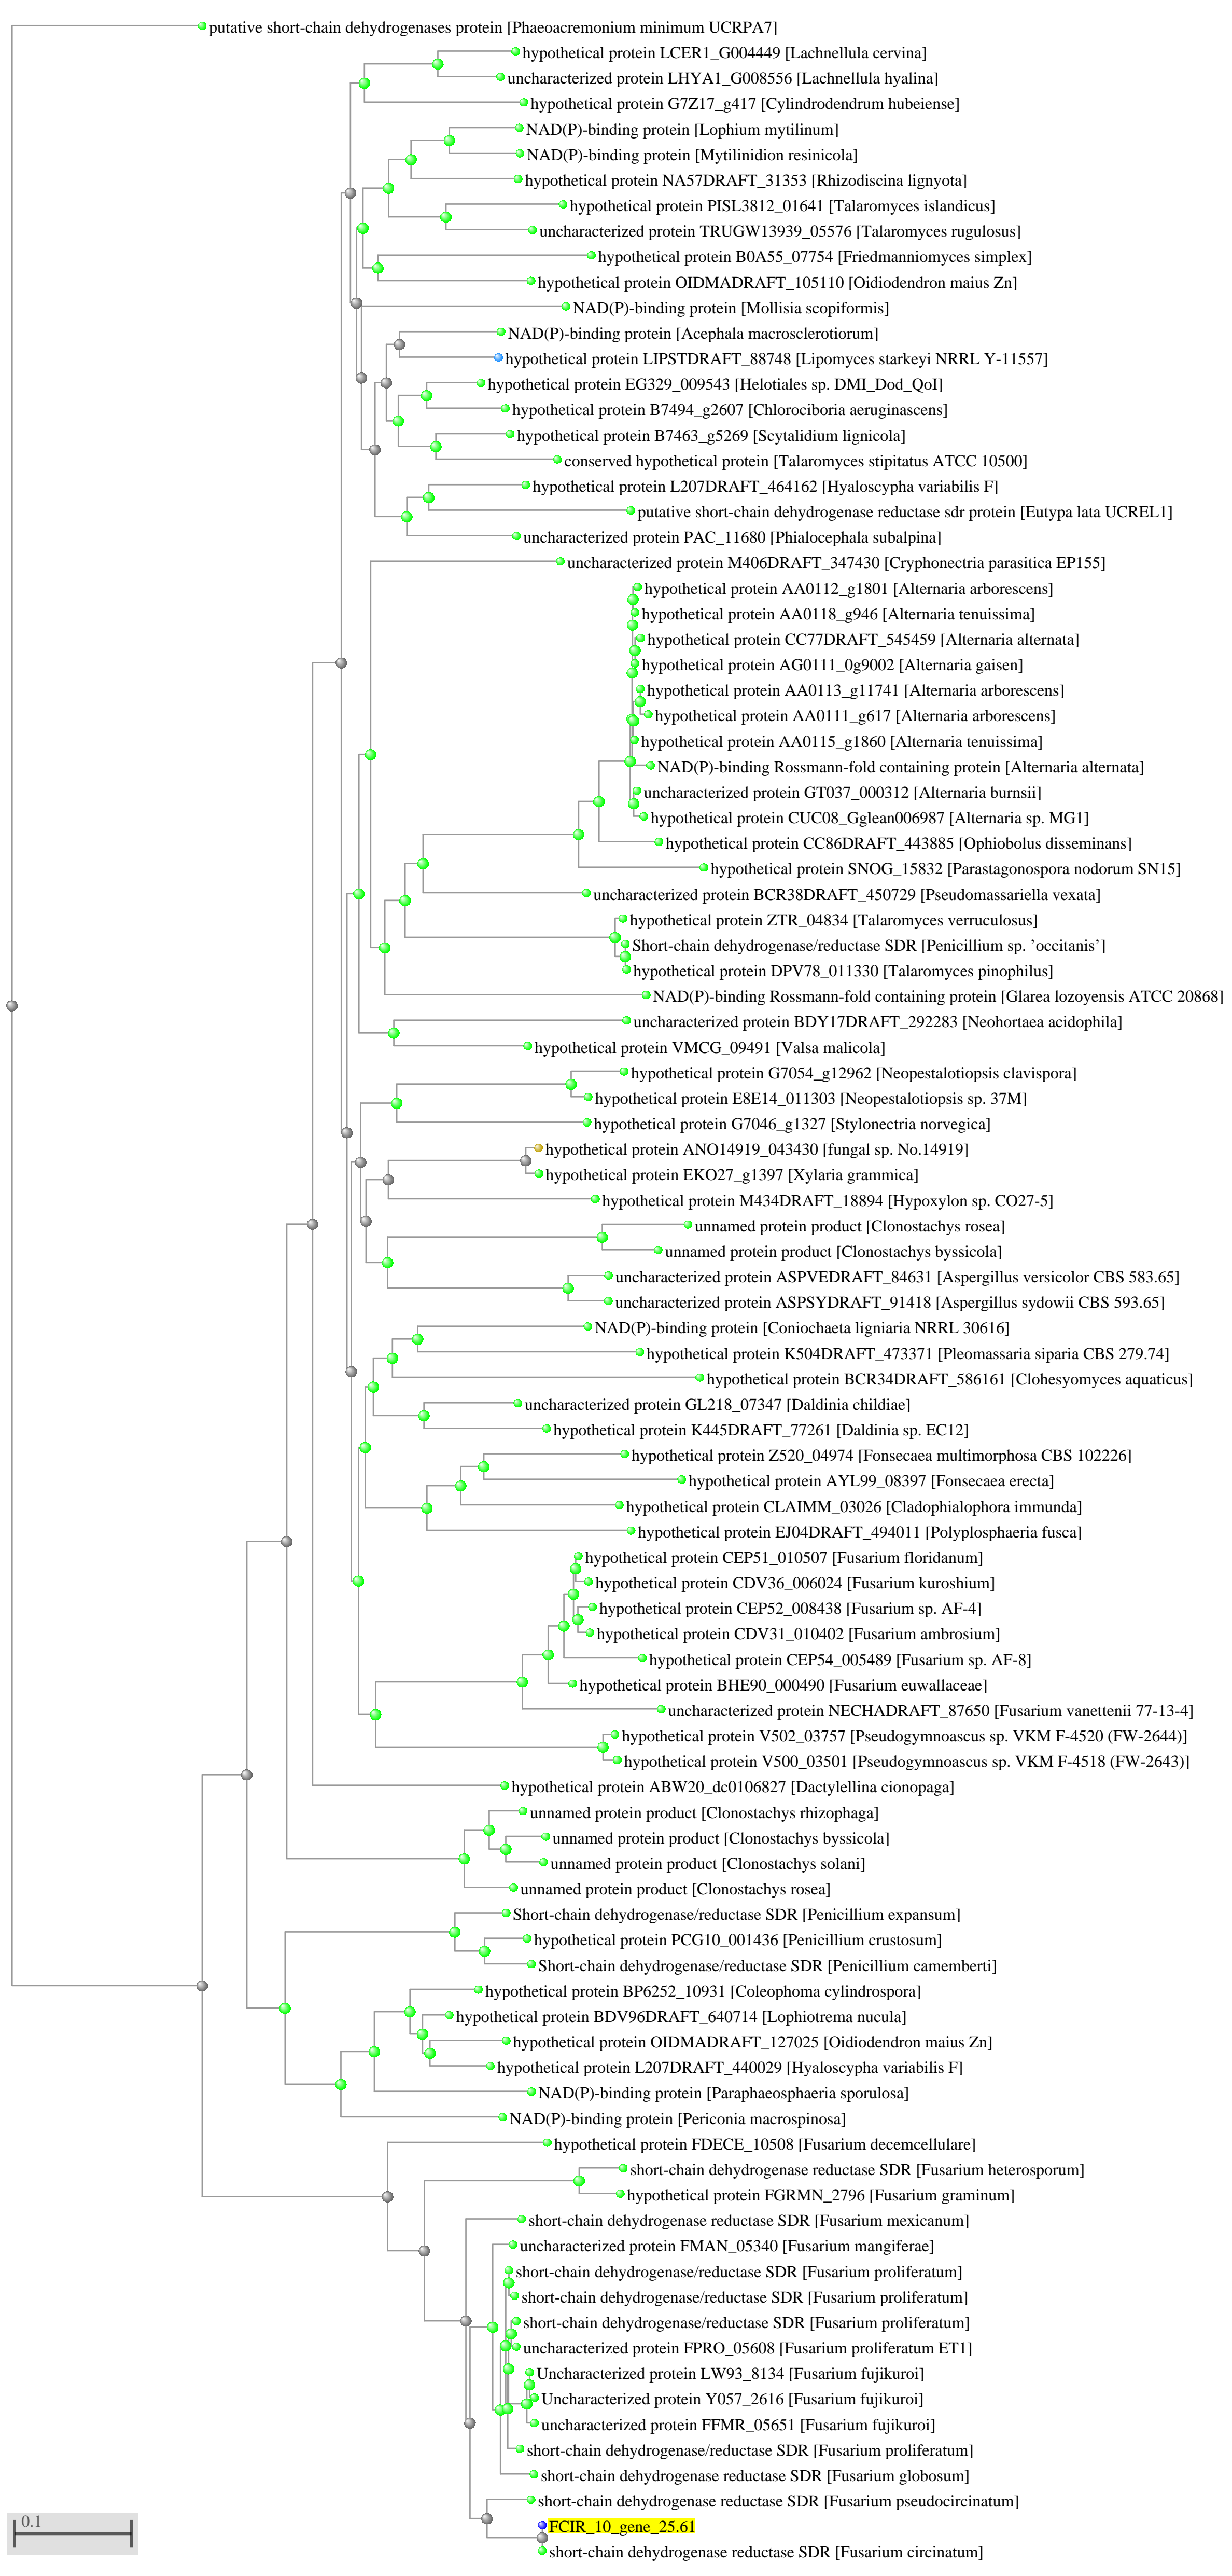



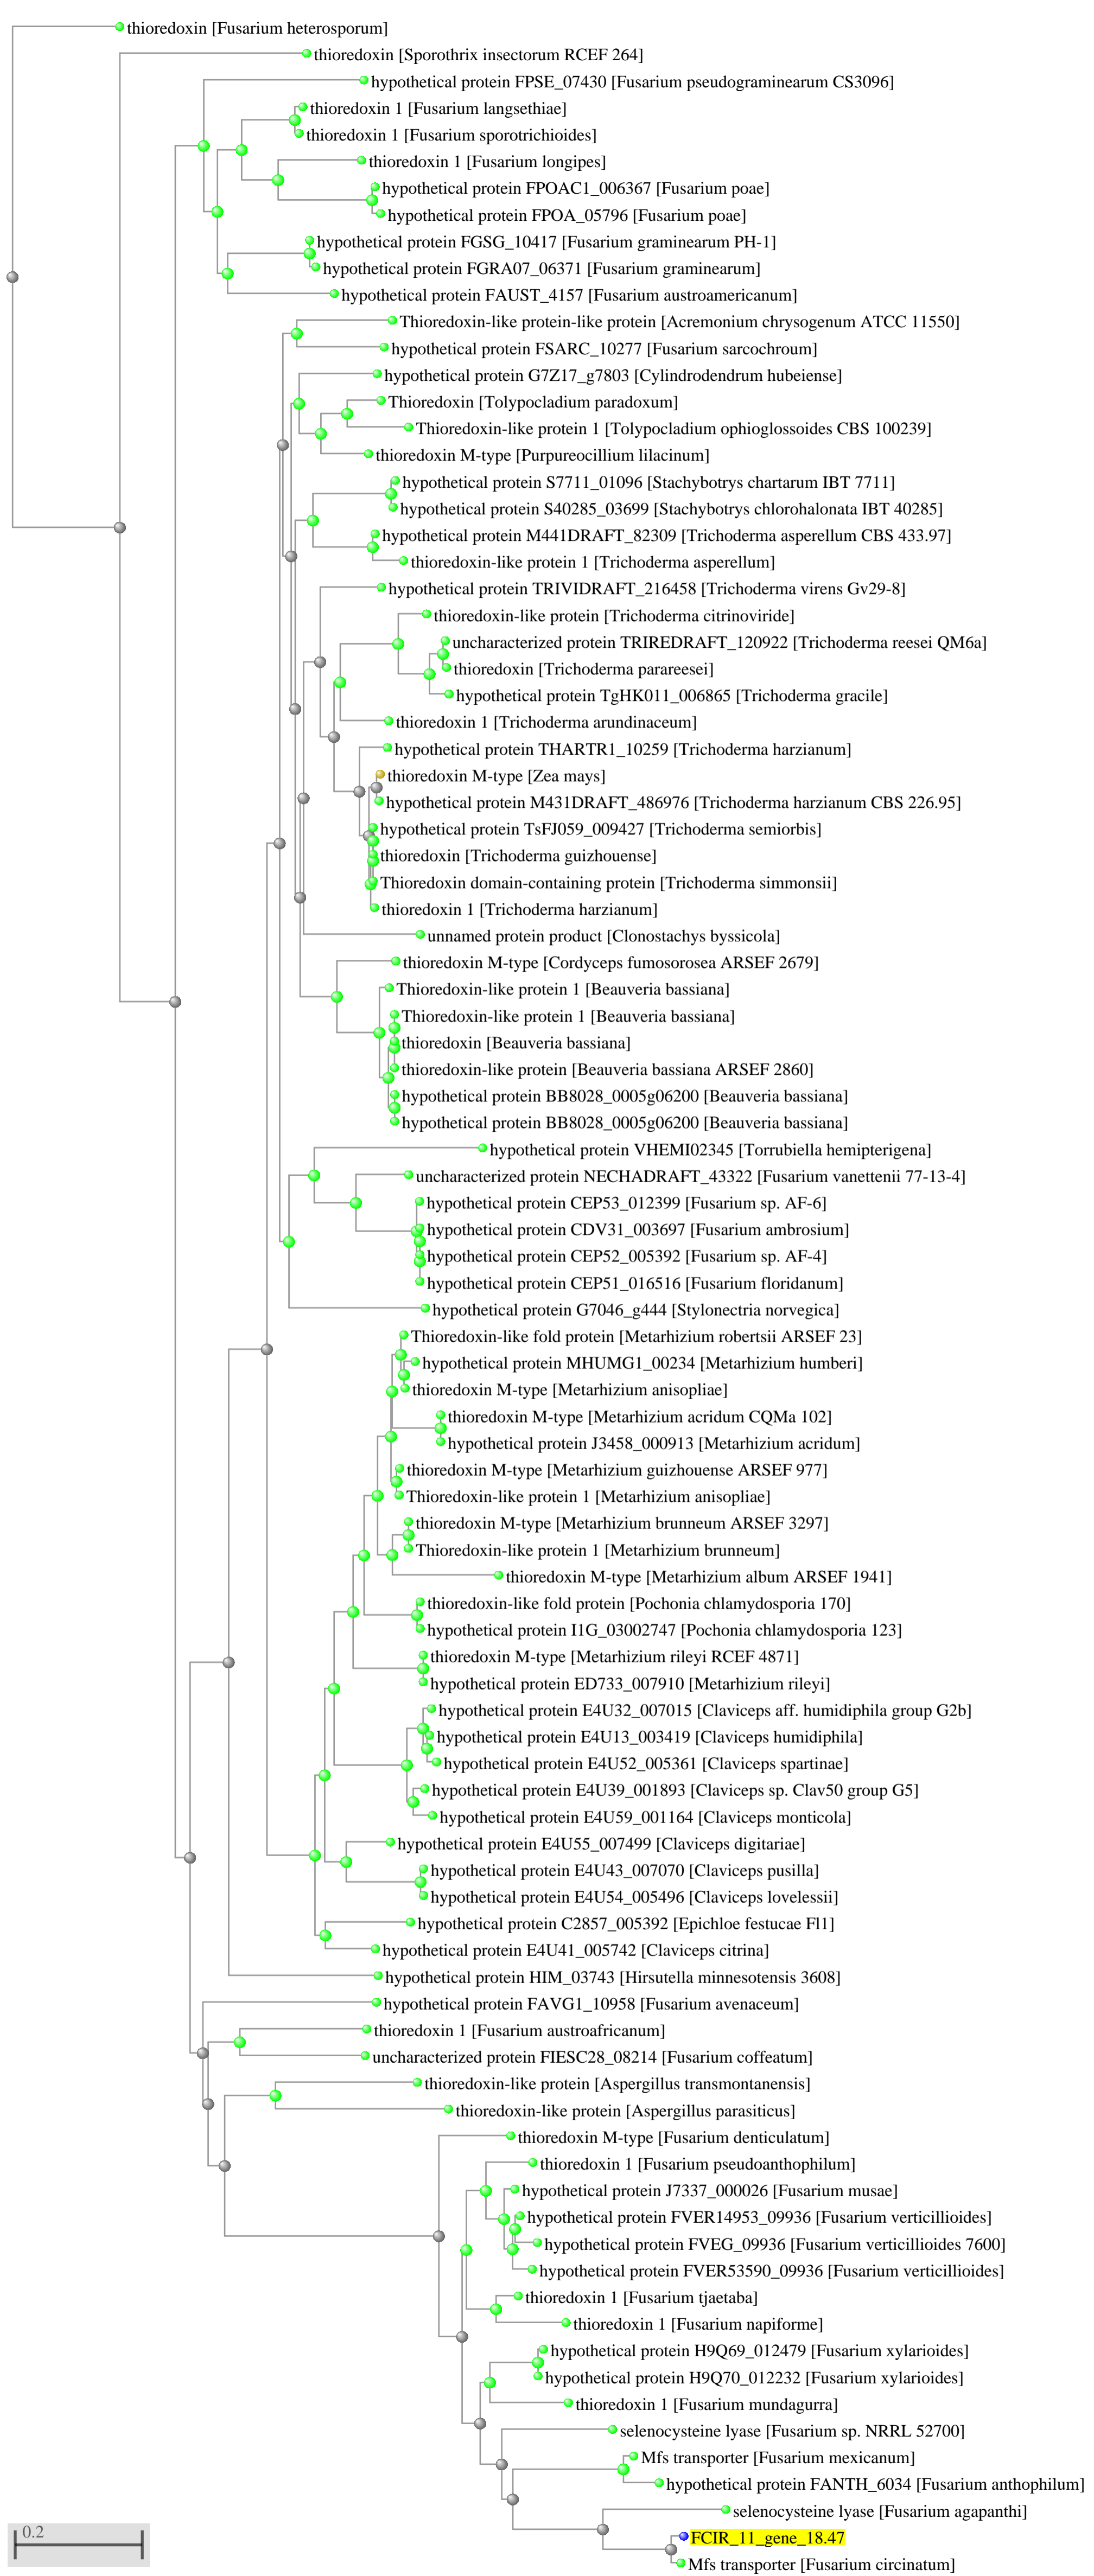



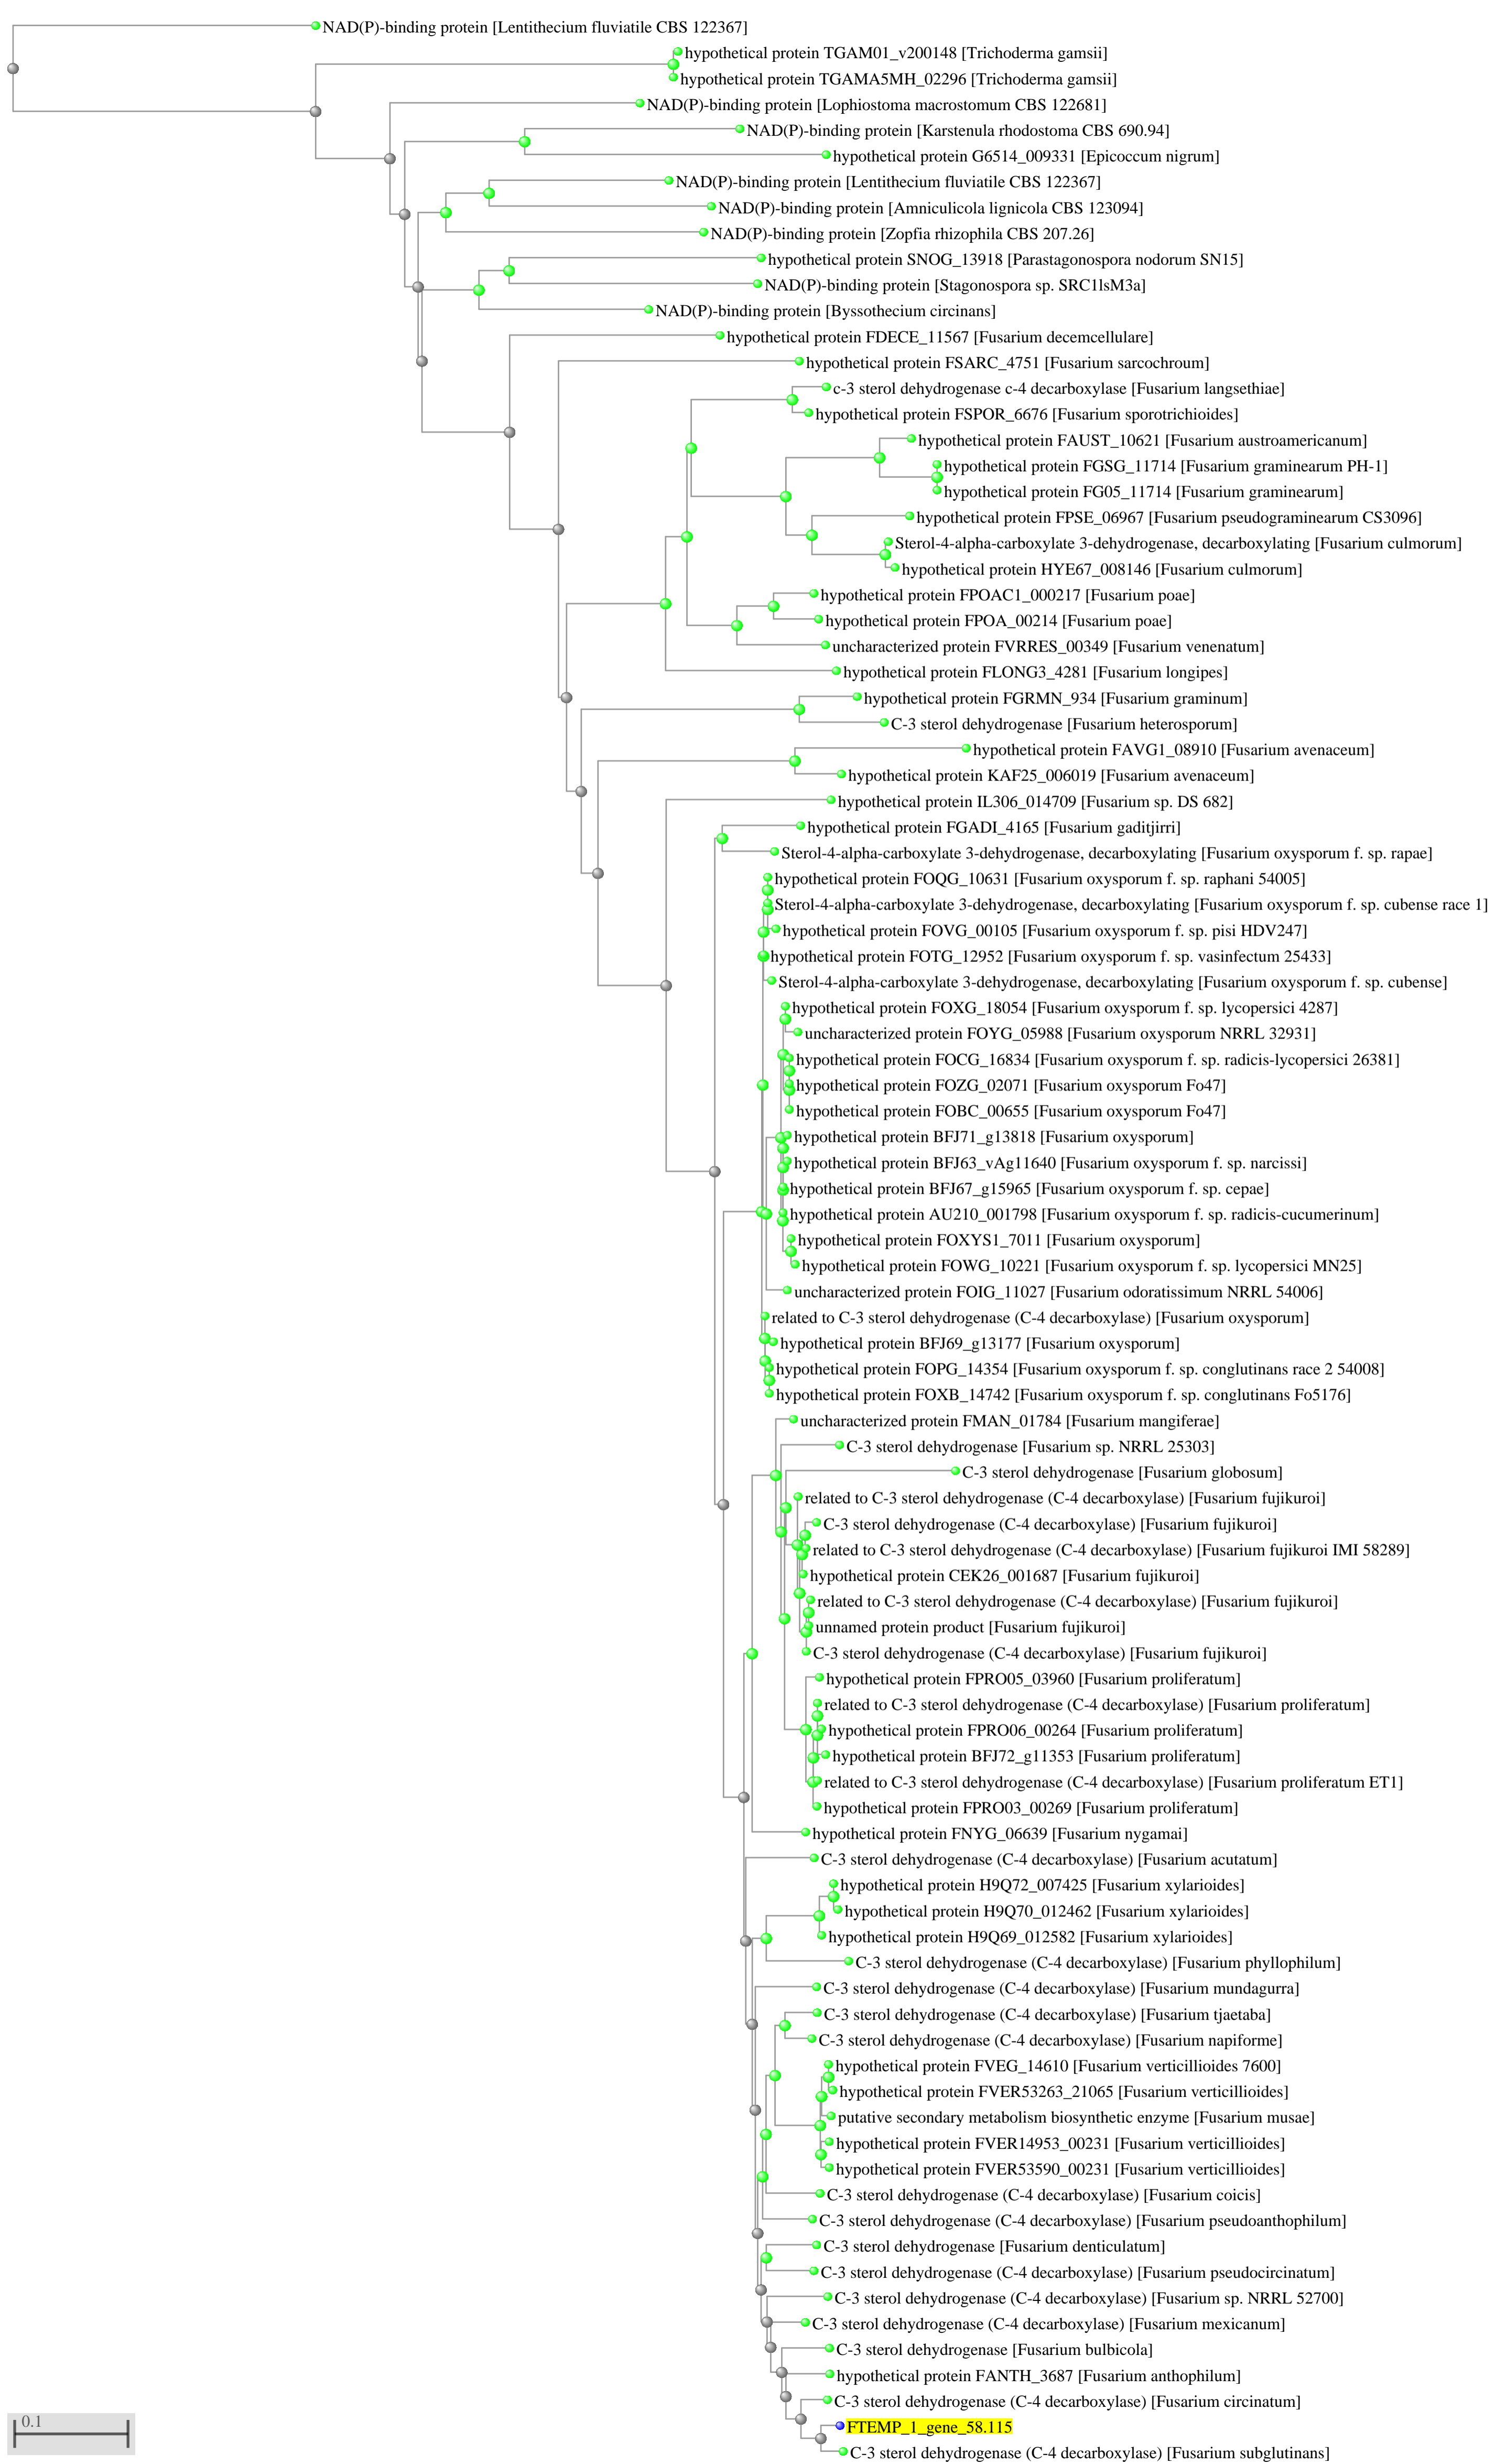

0.1

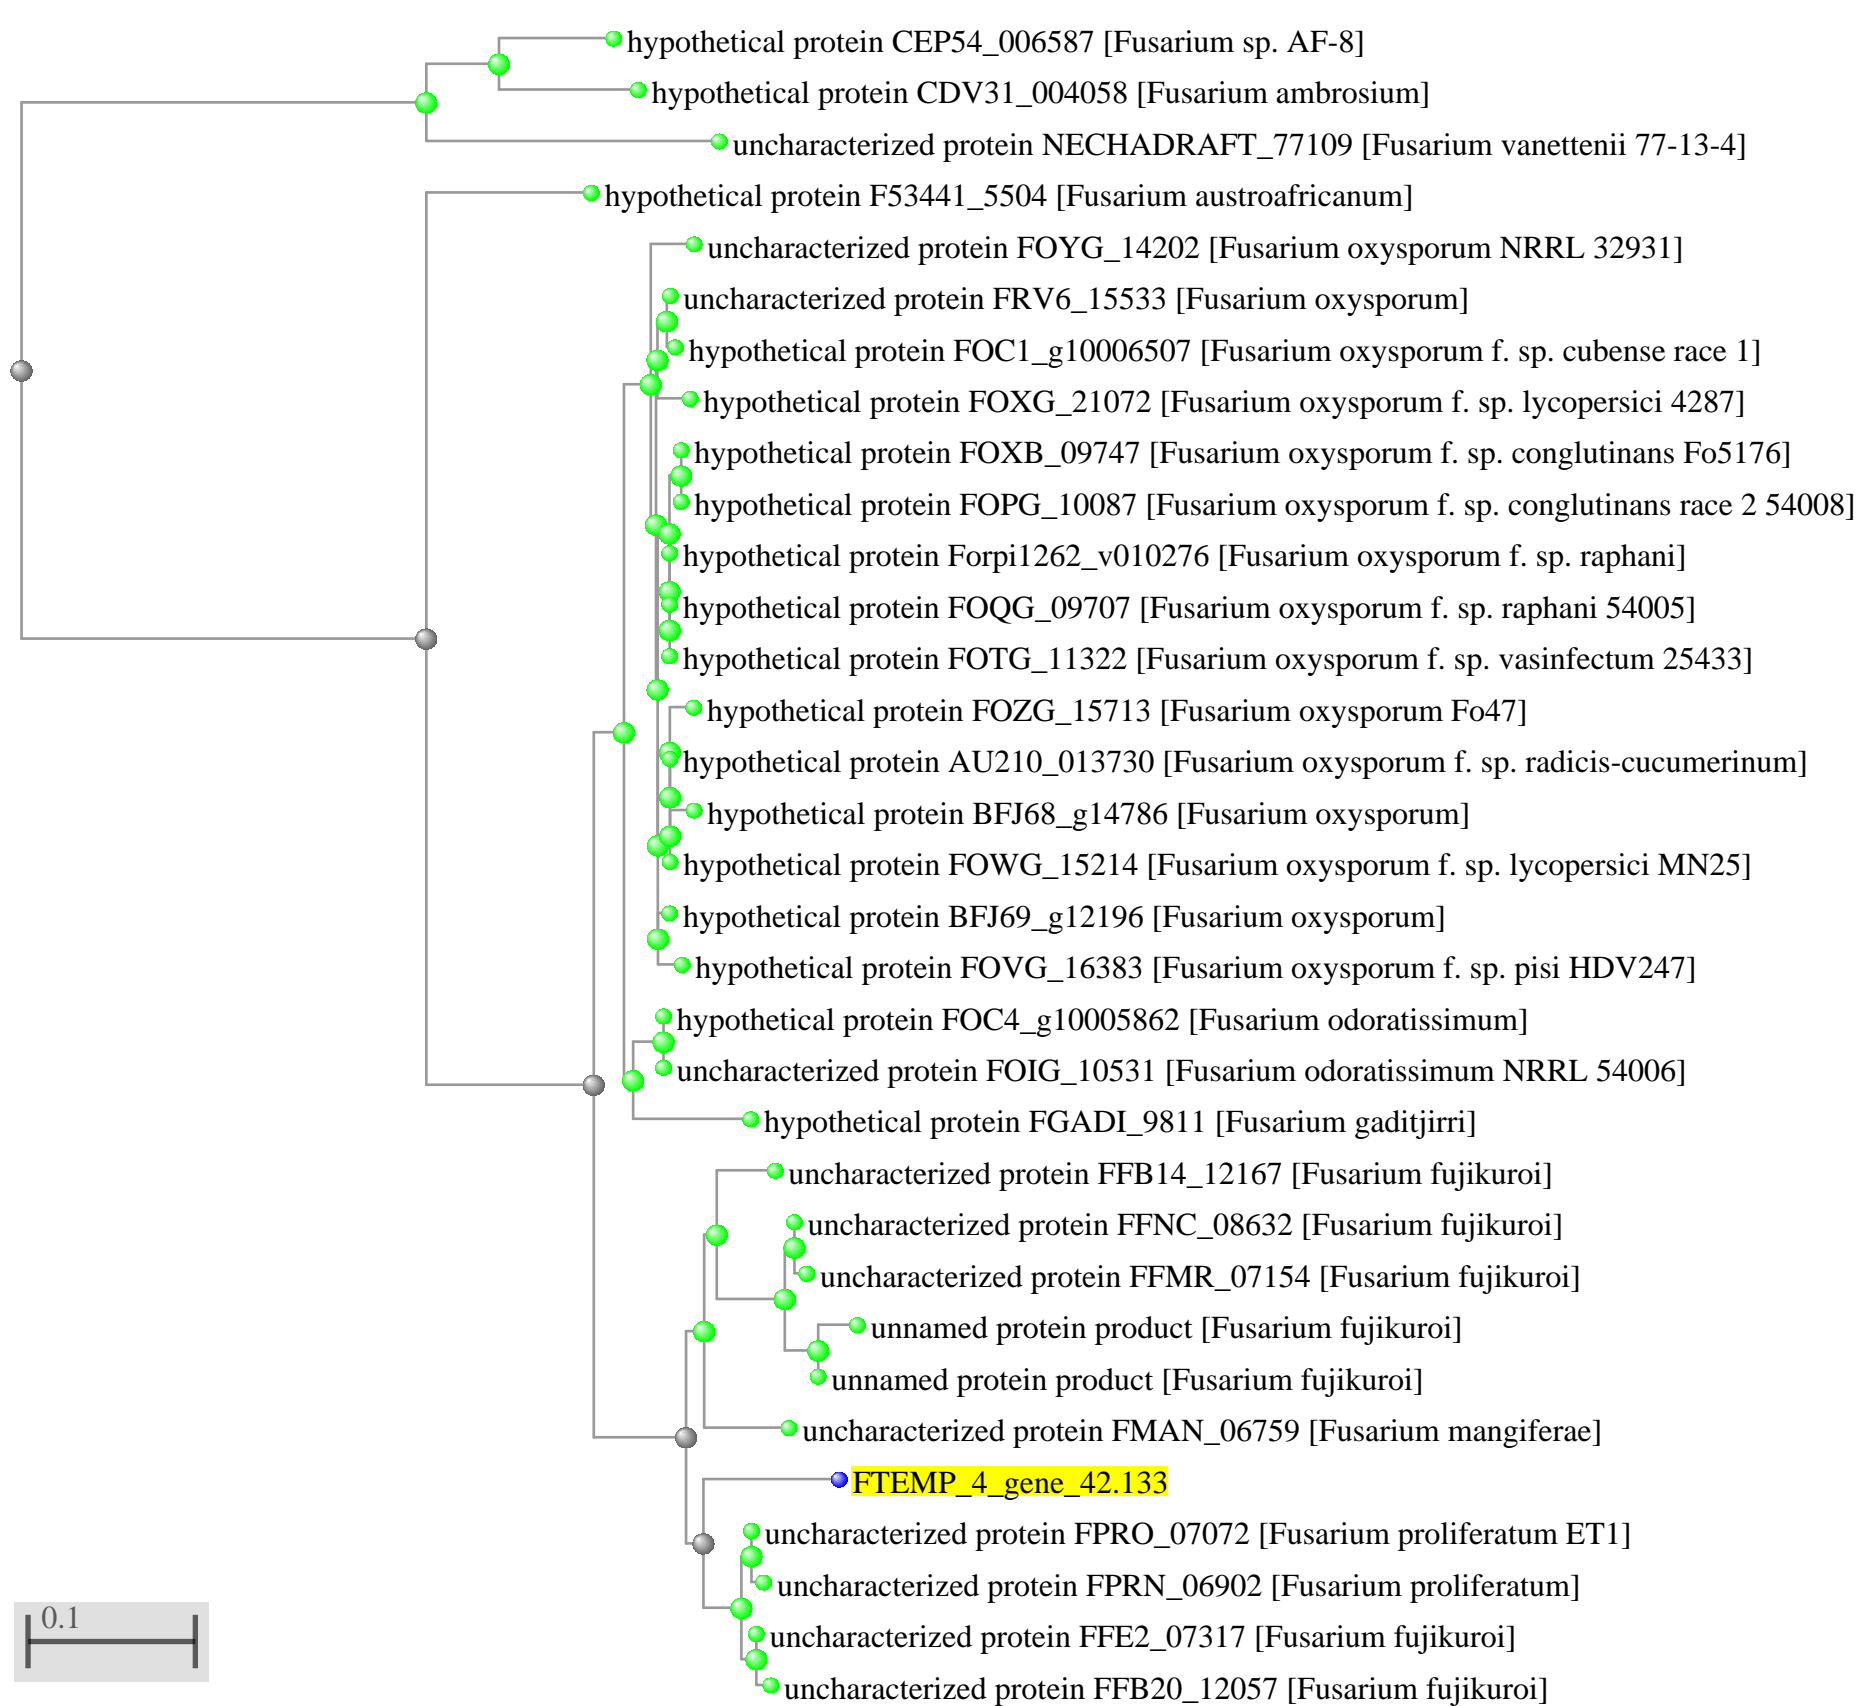

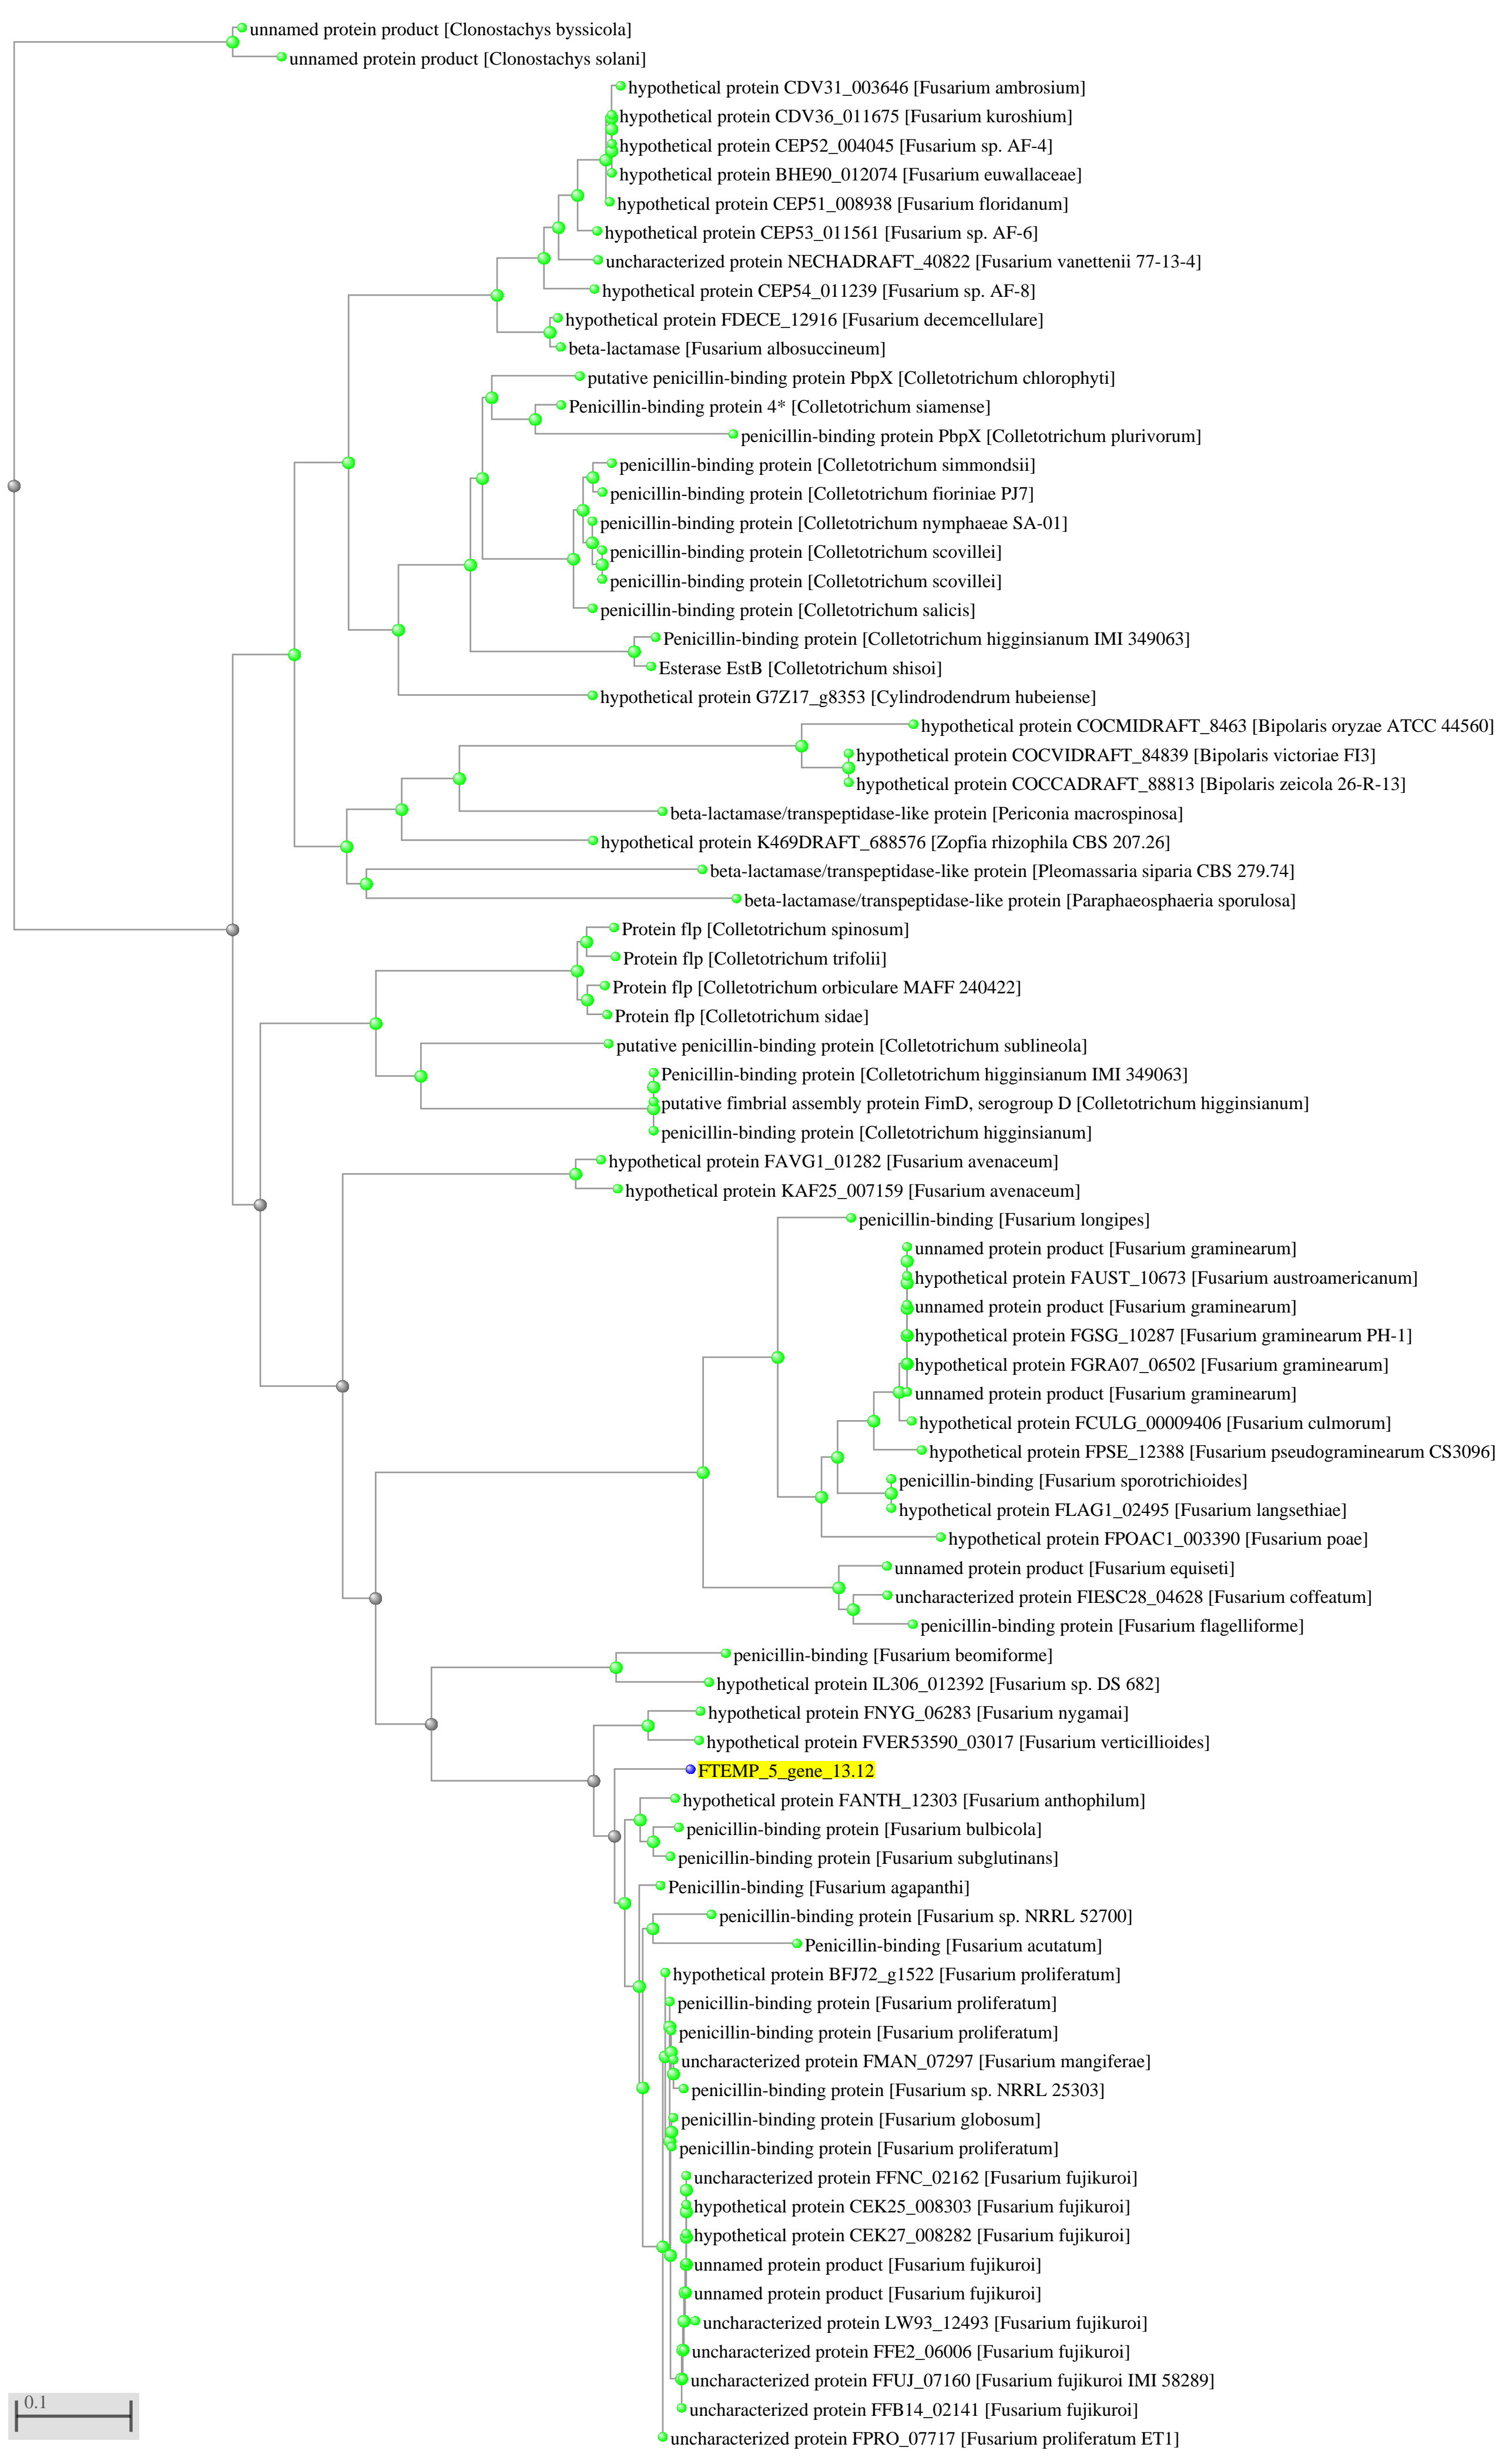

0.1



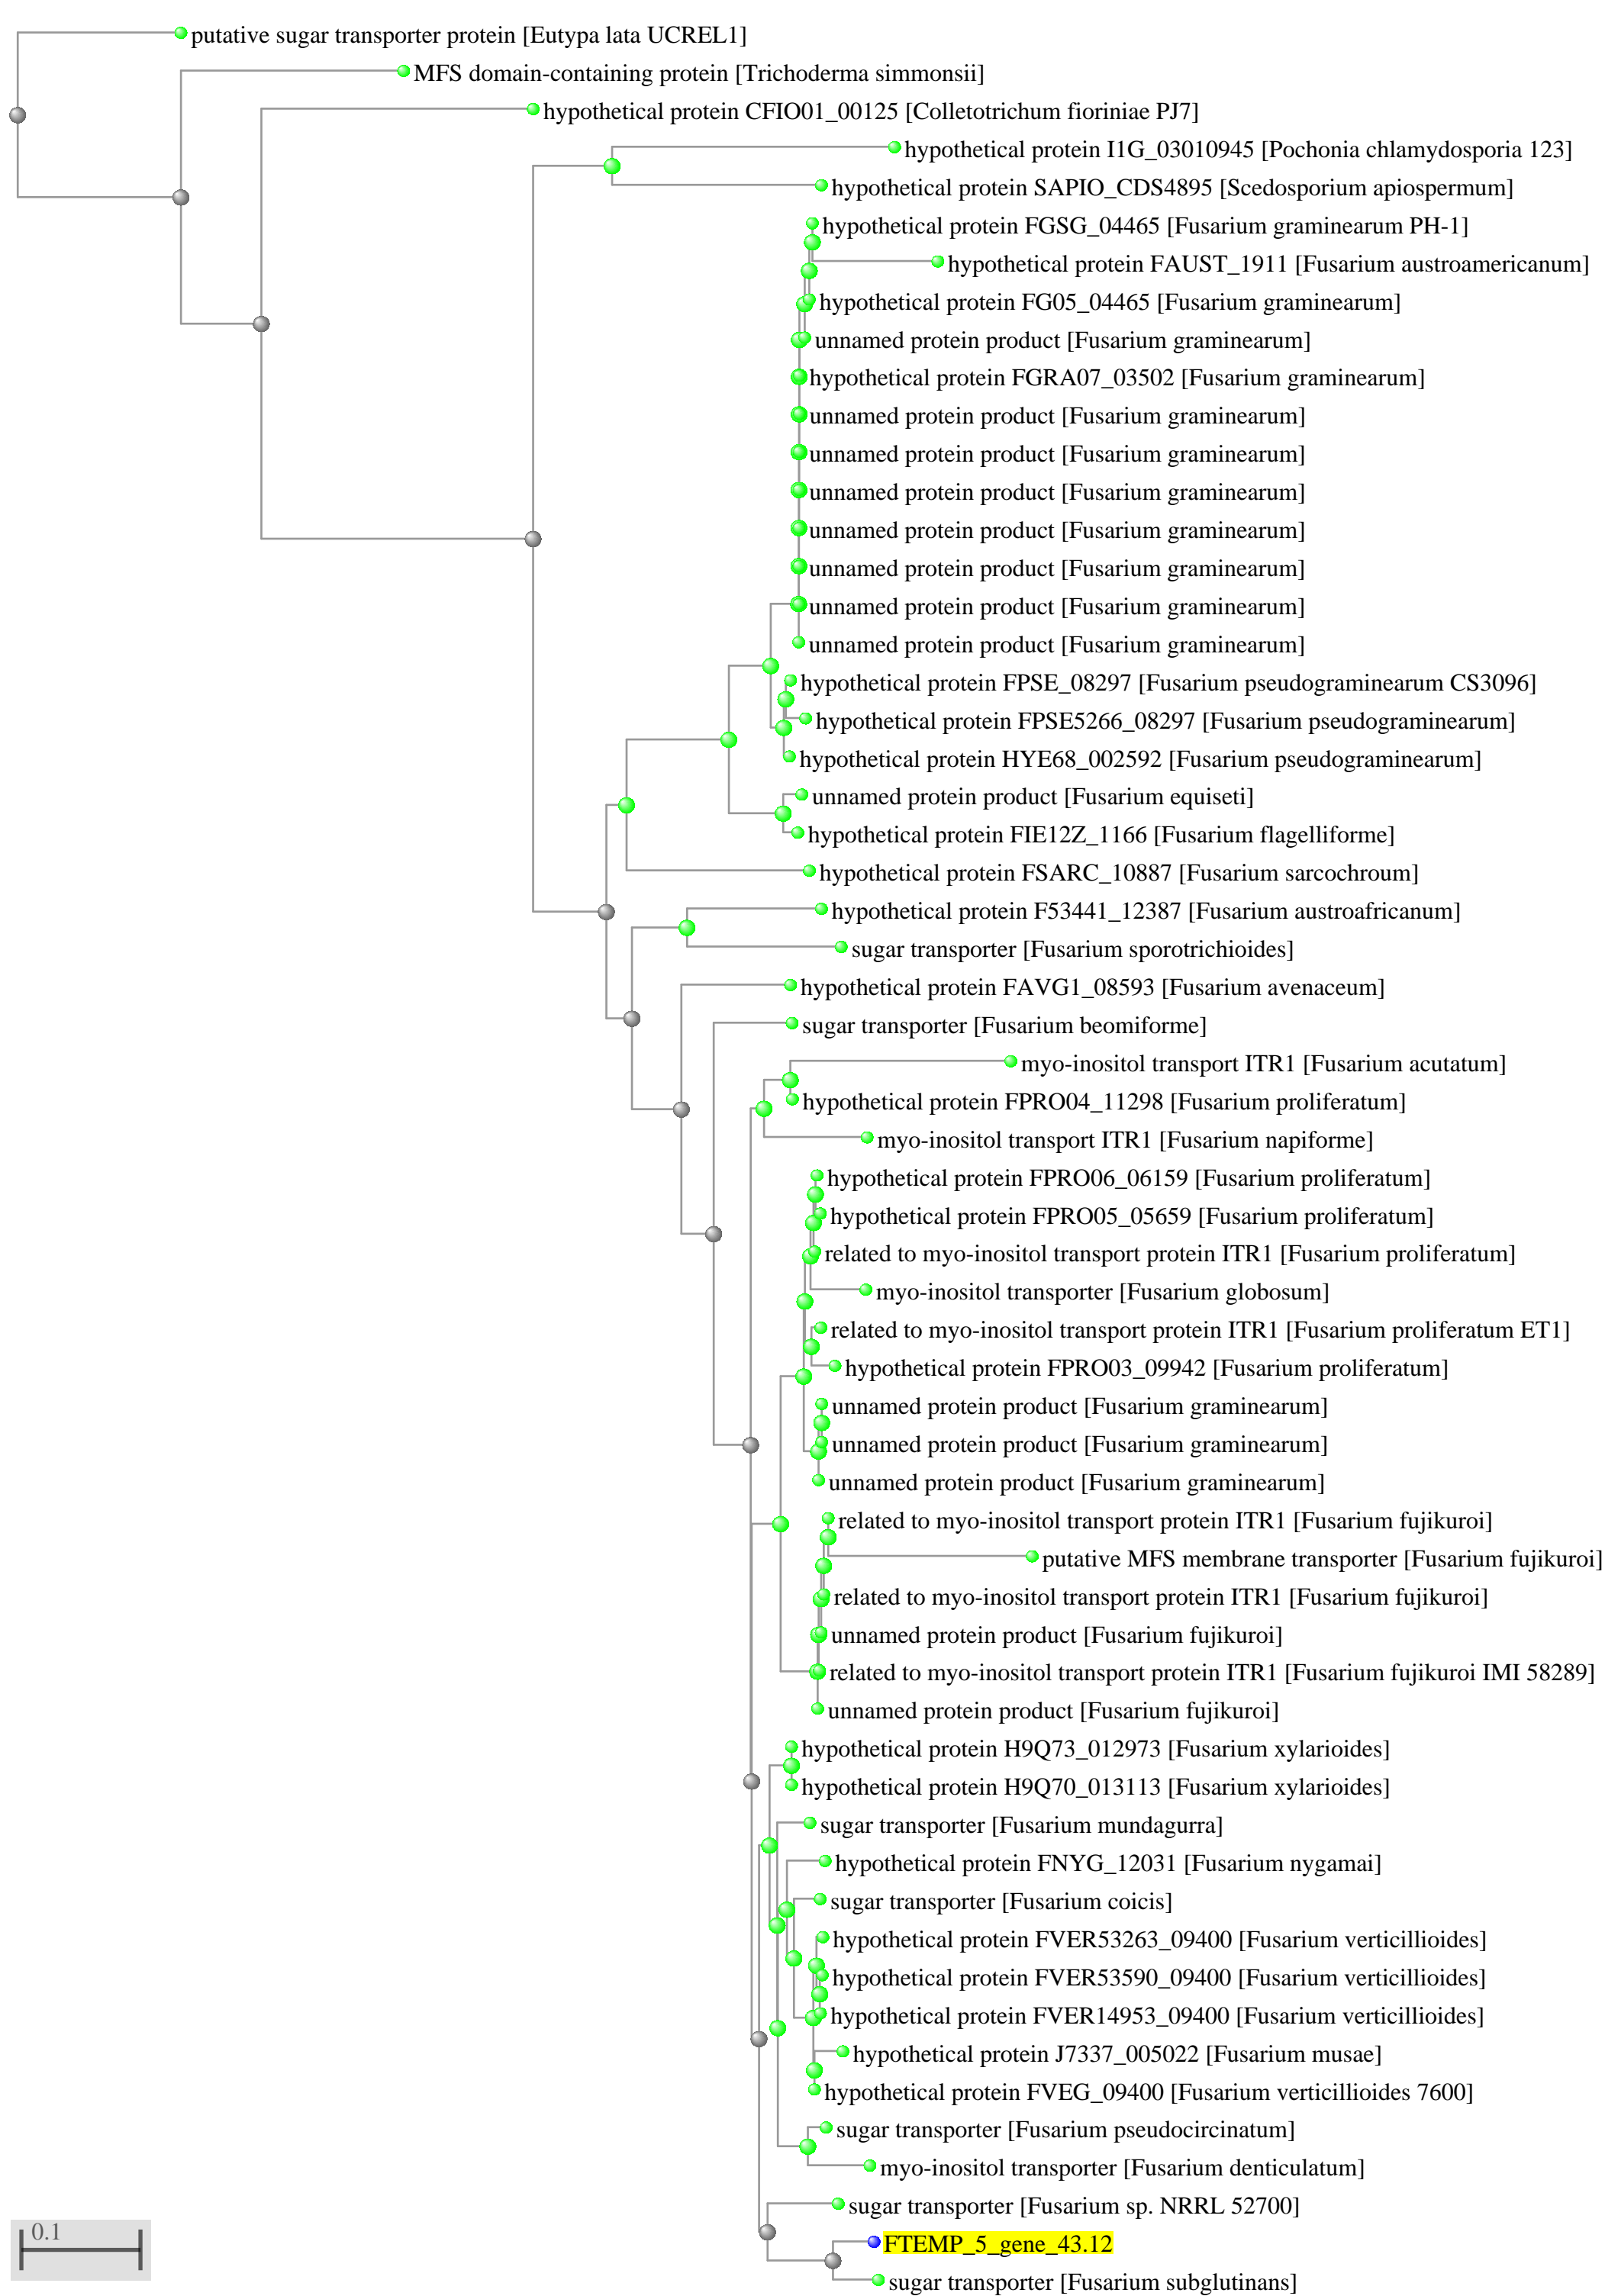

0.1

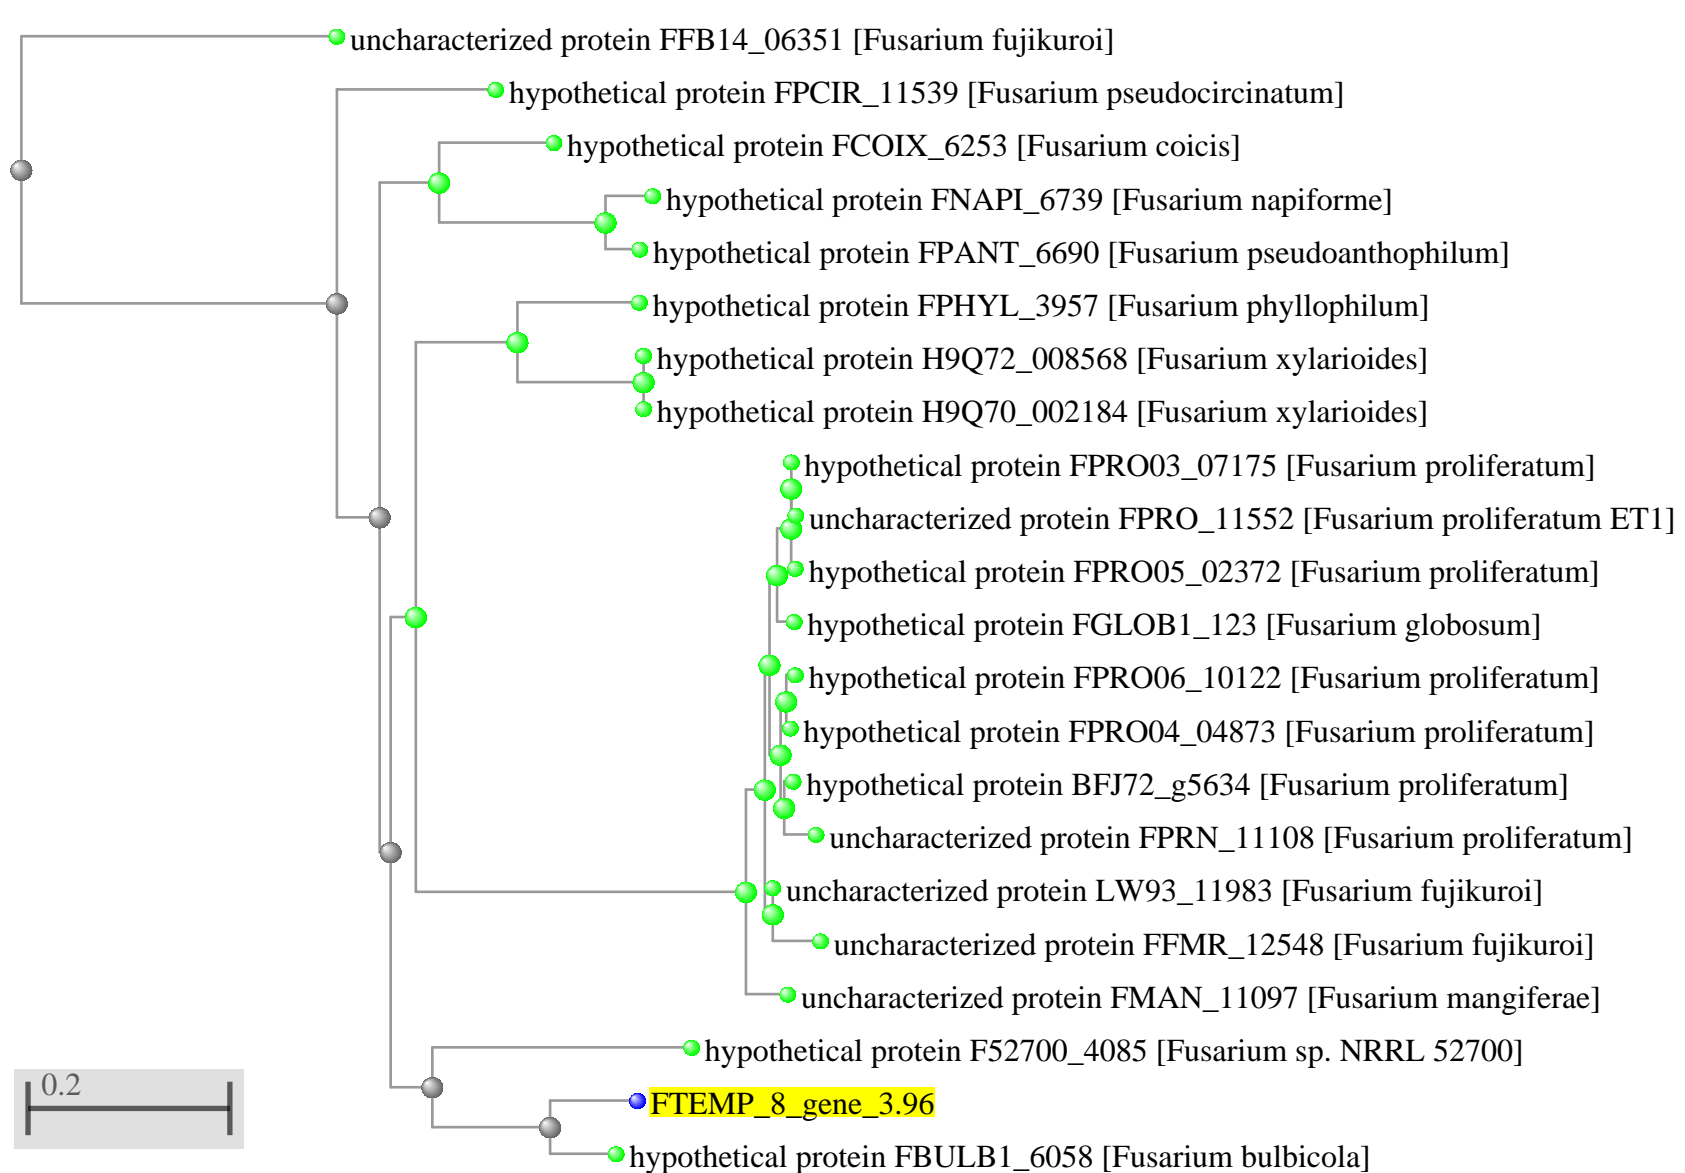

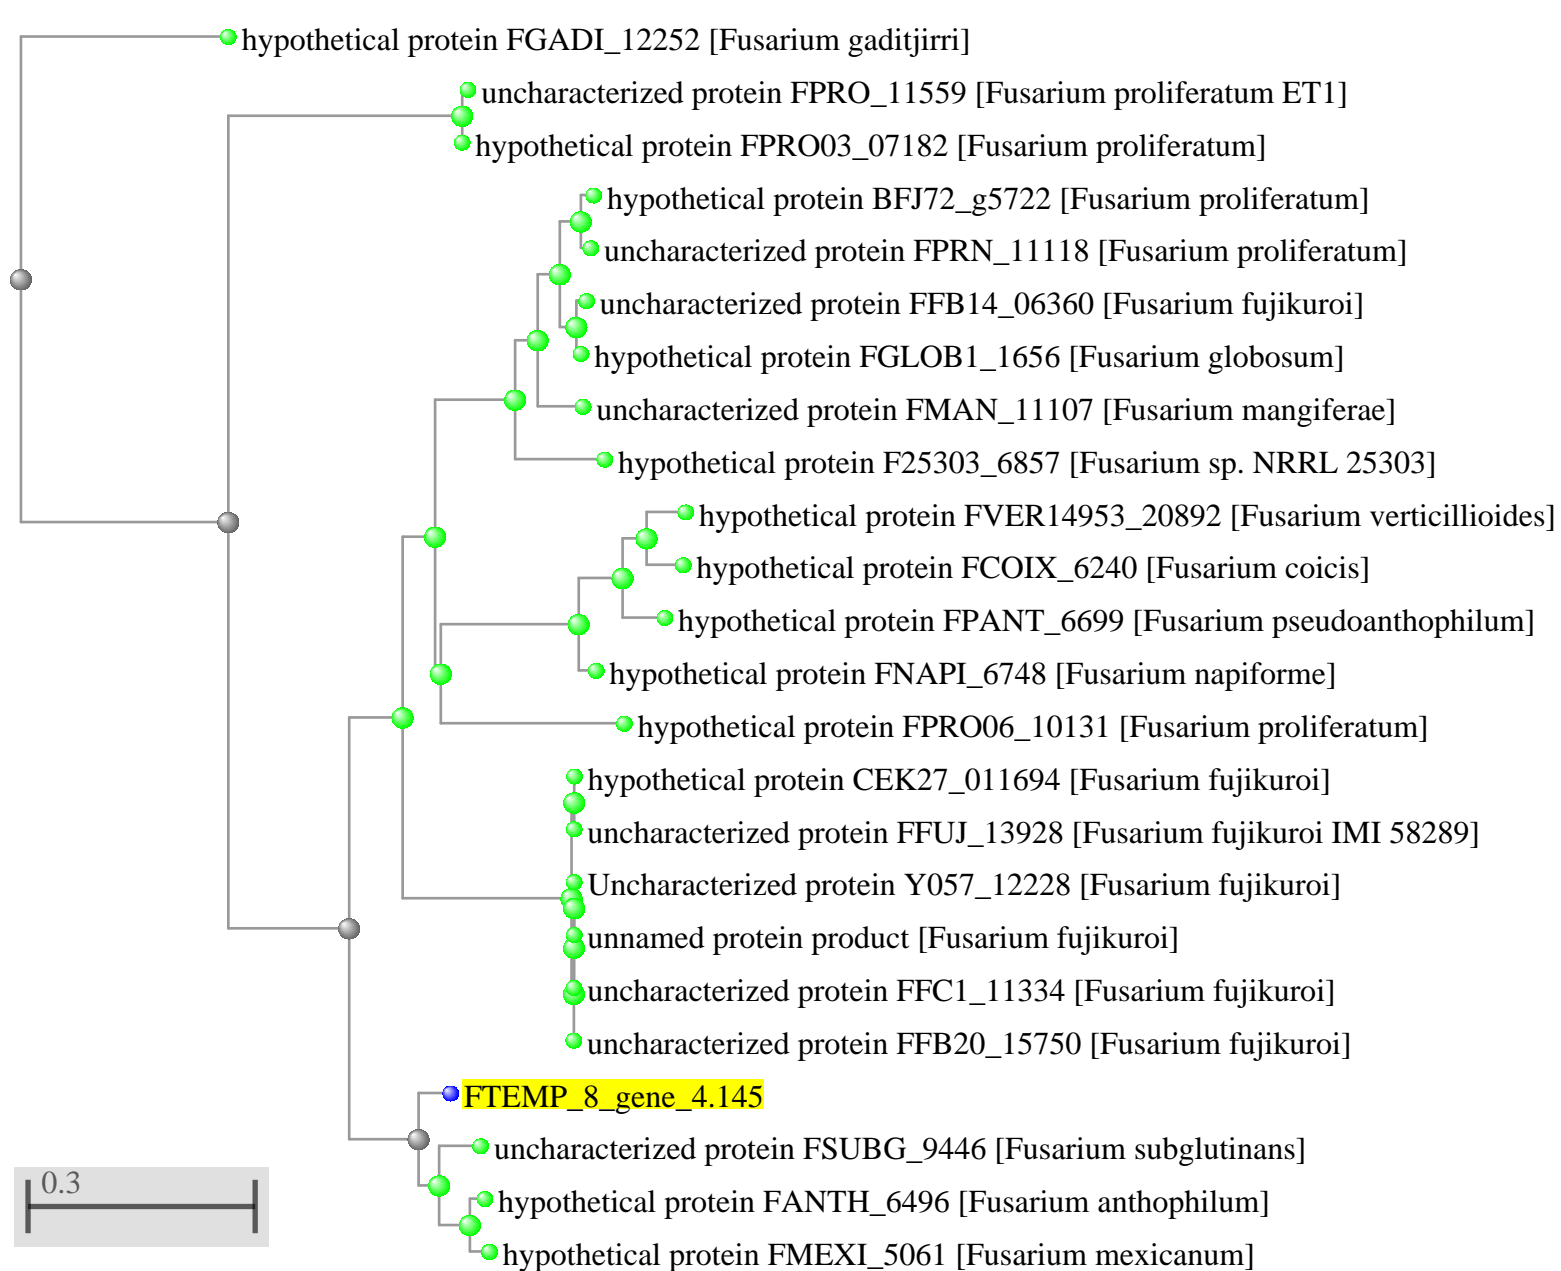

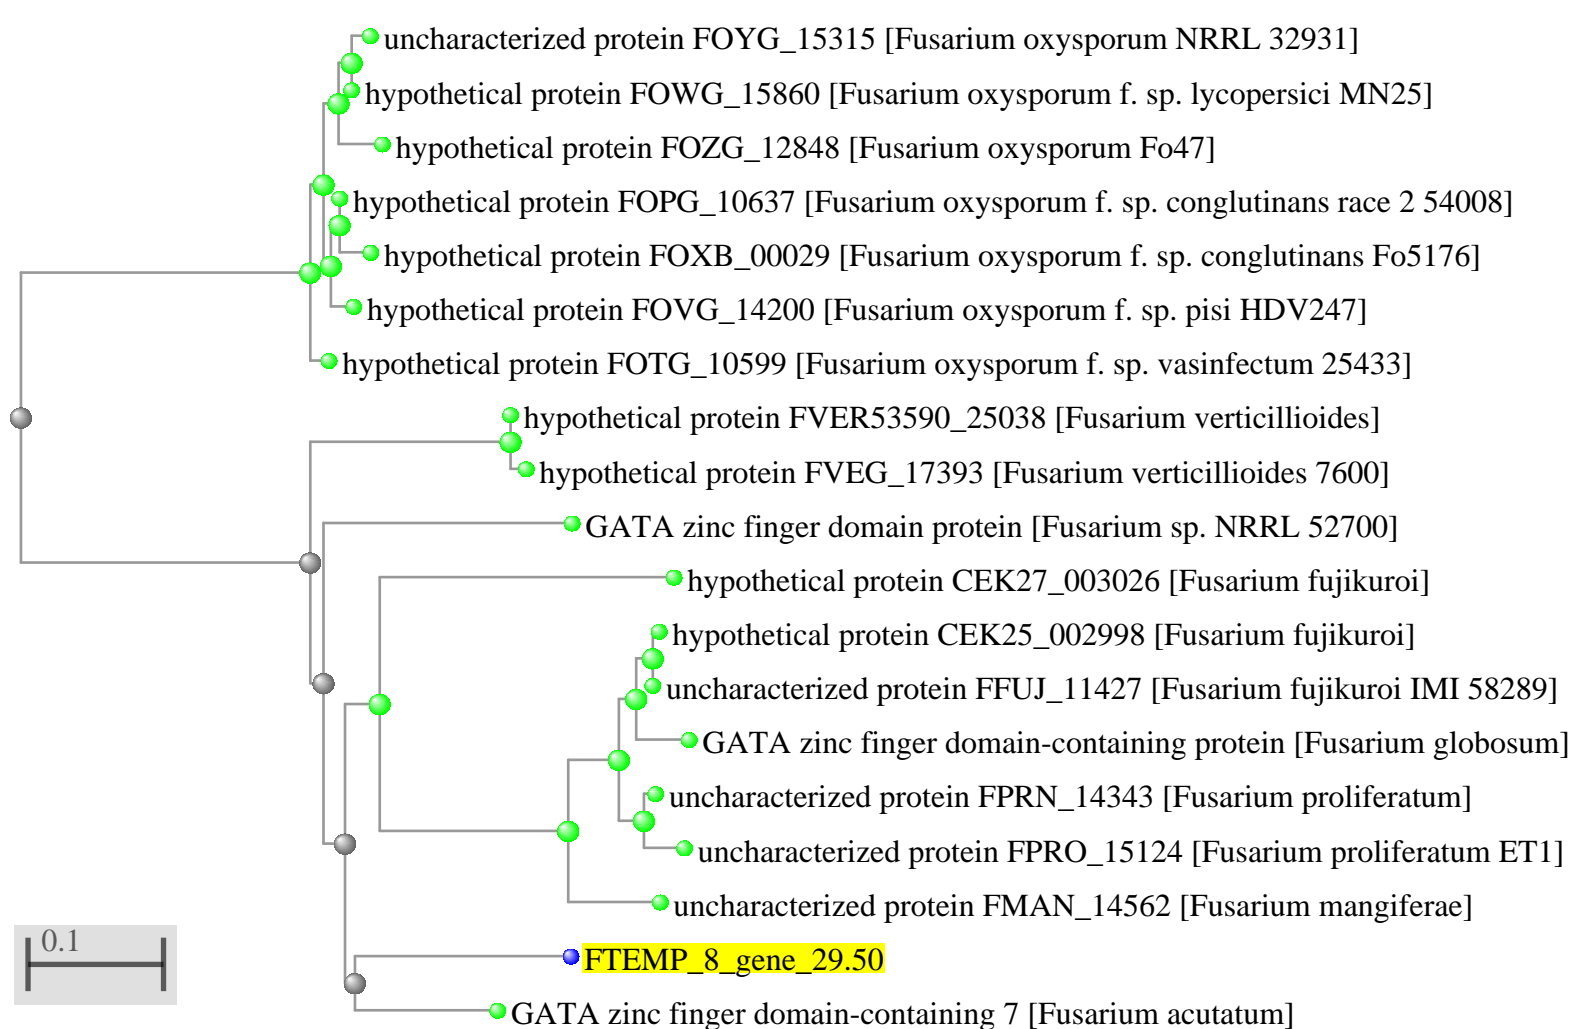



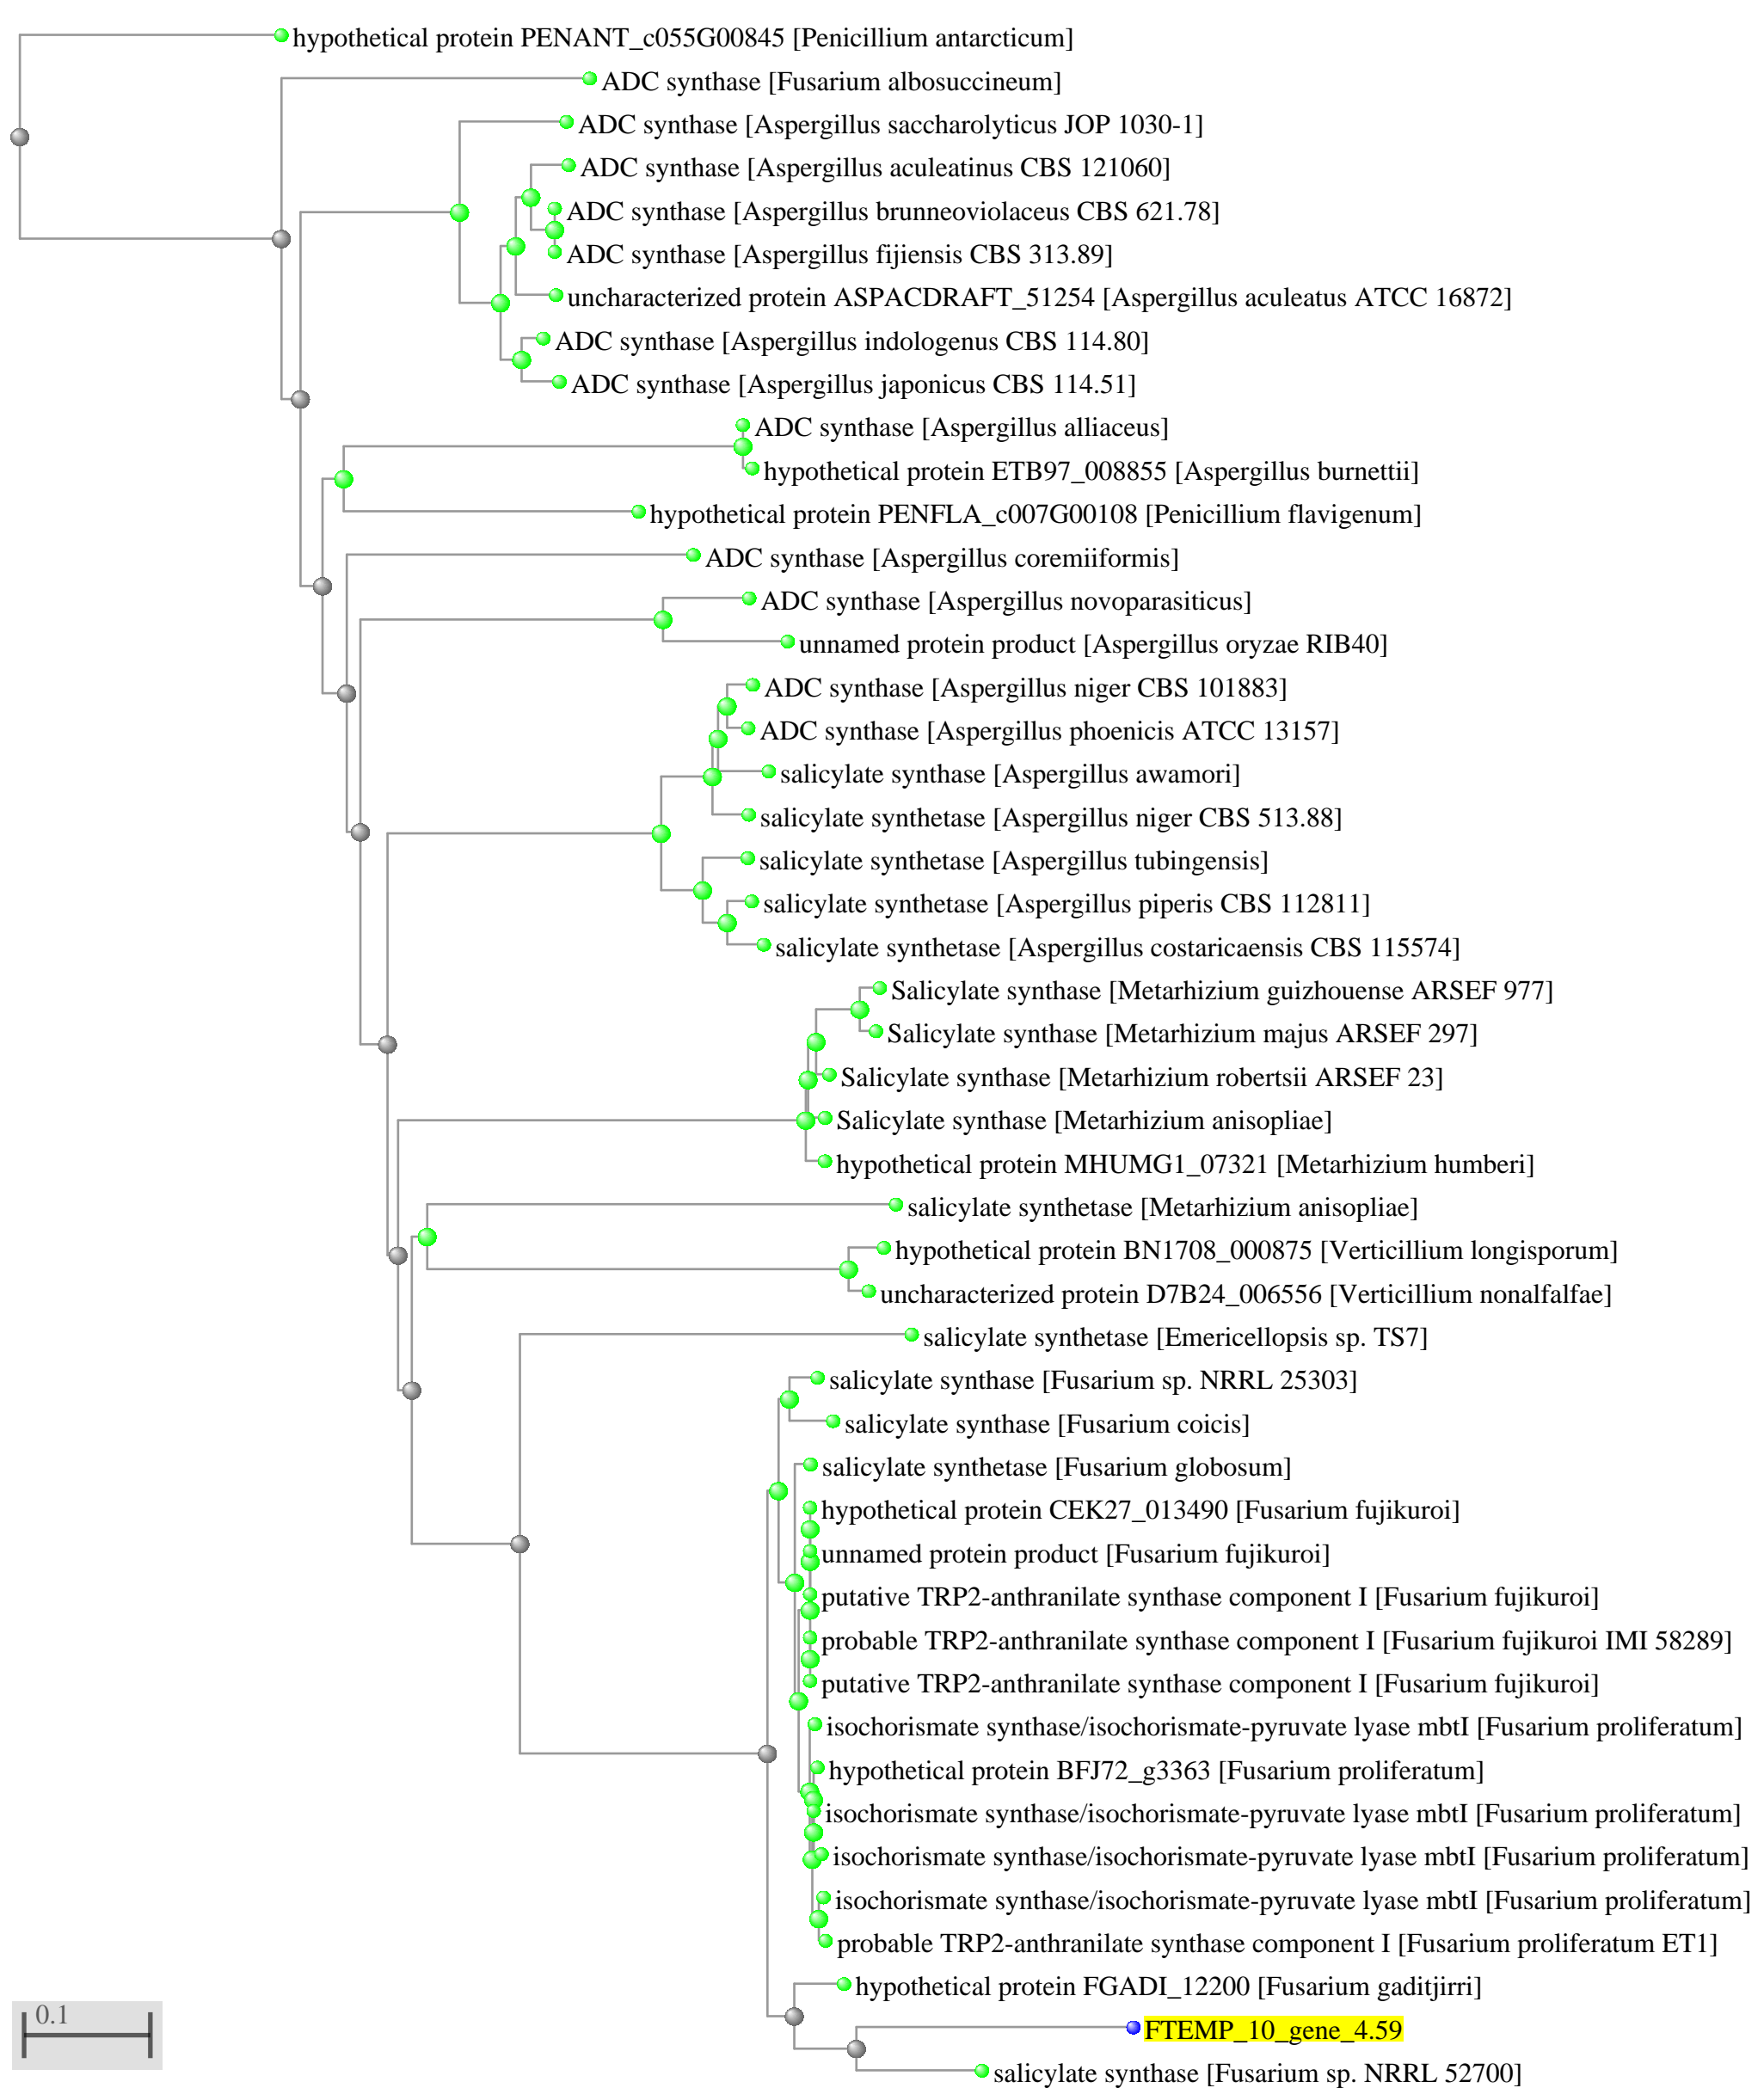

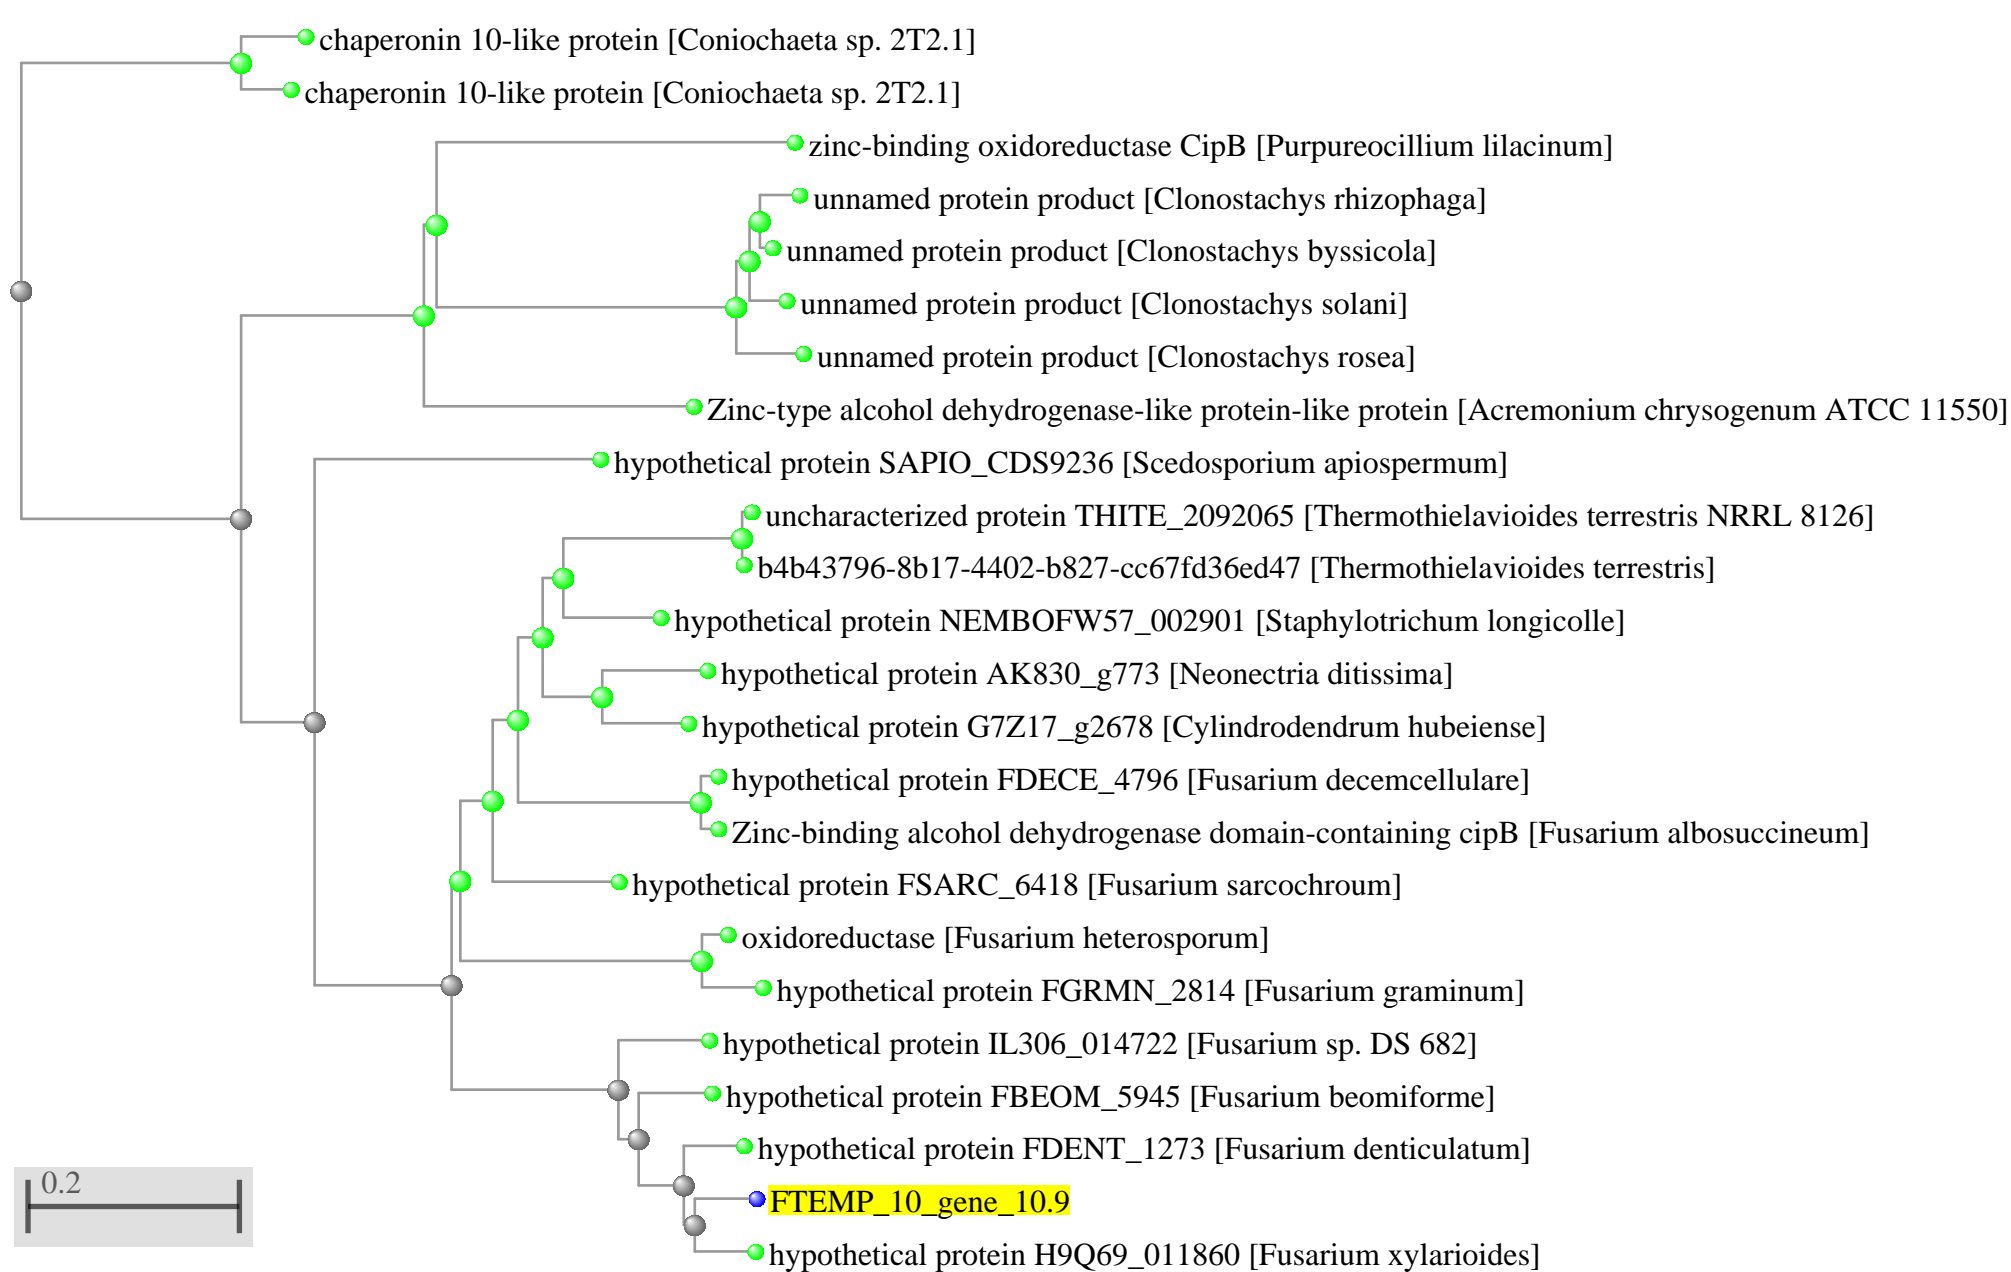

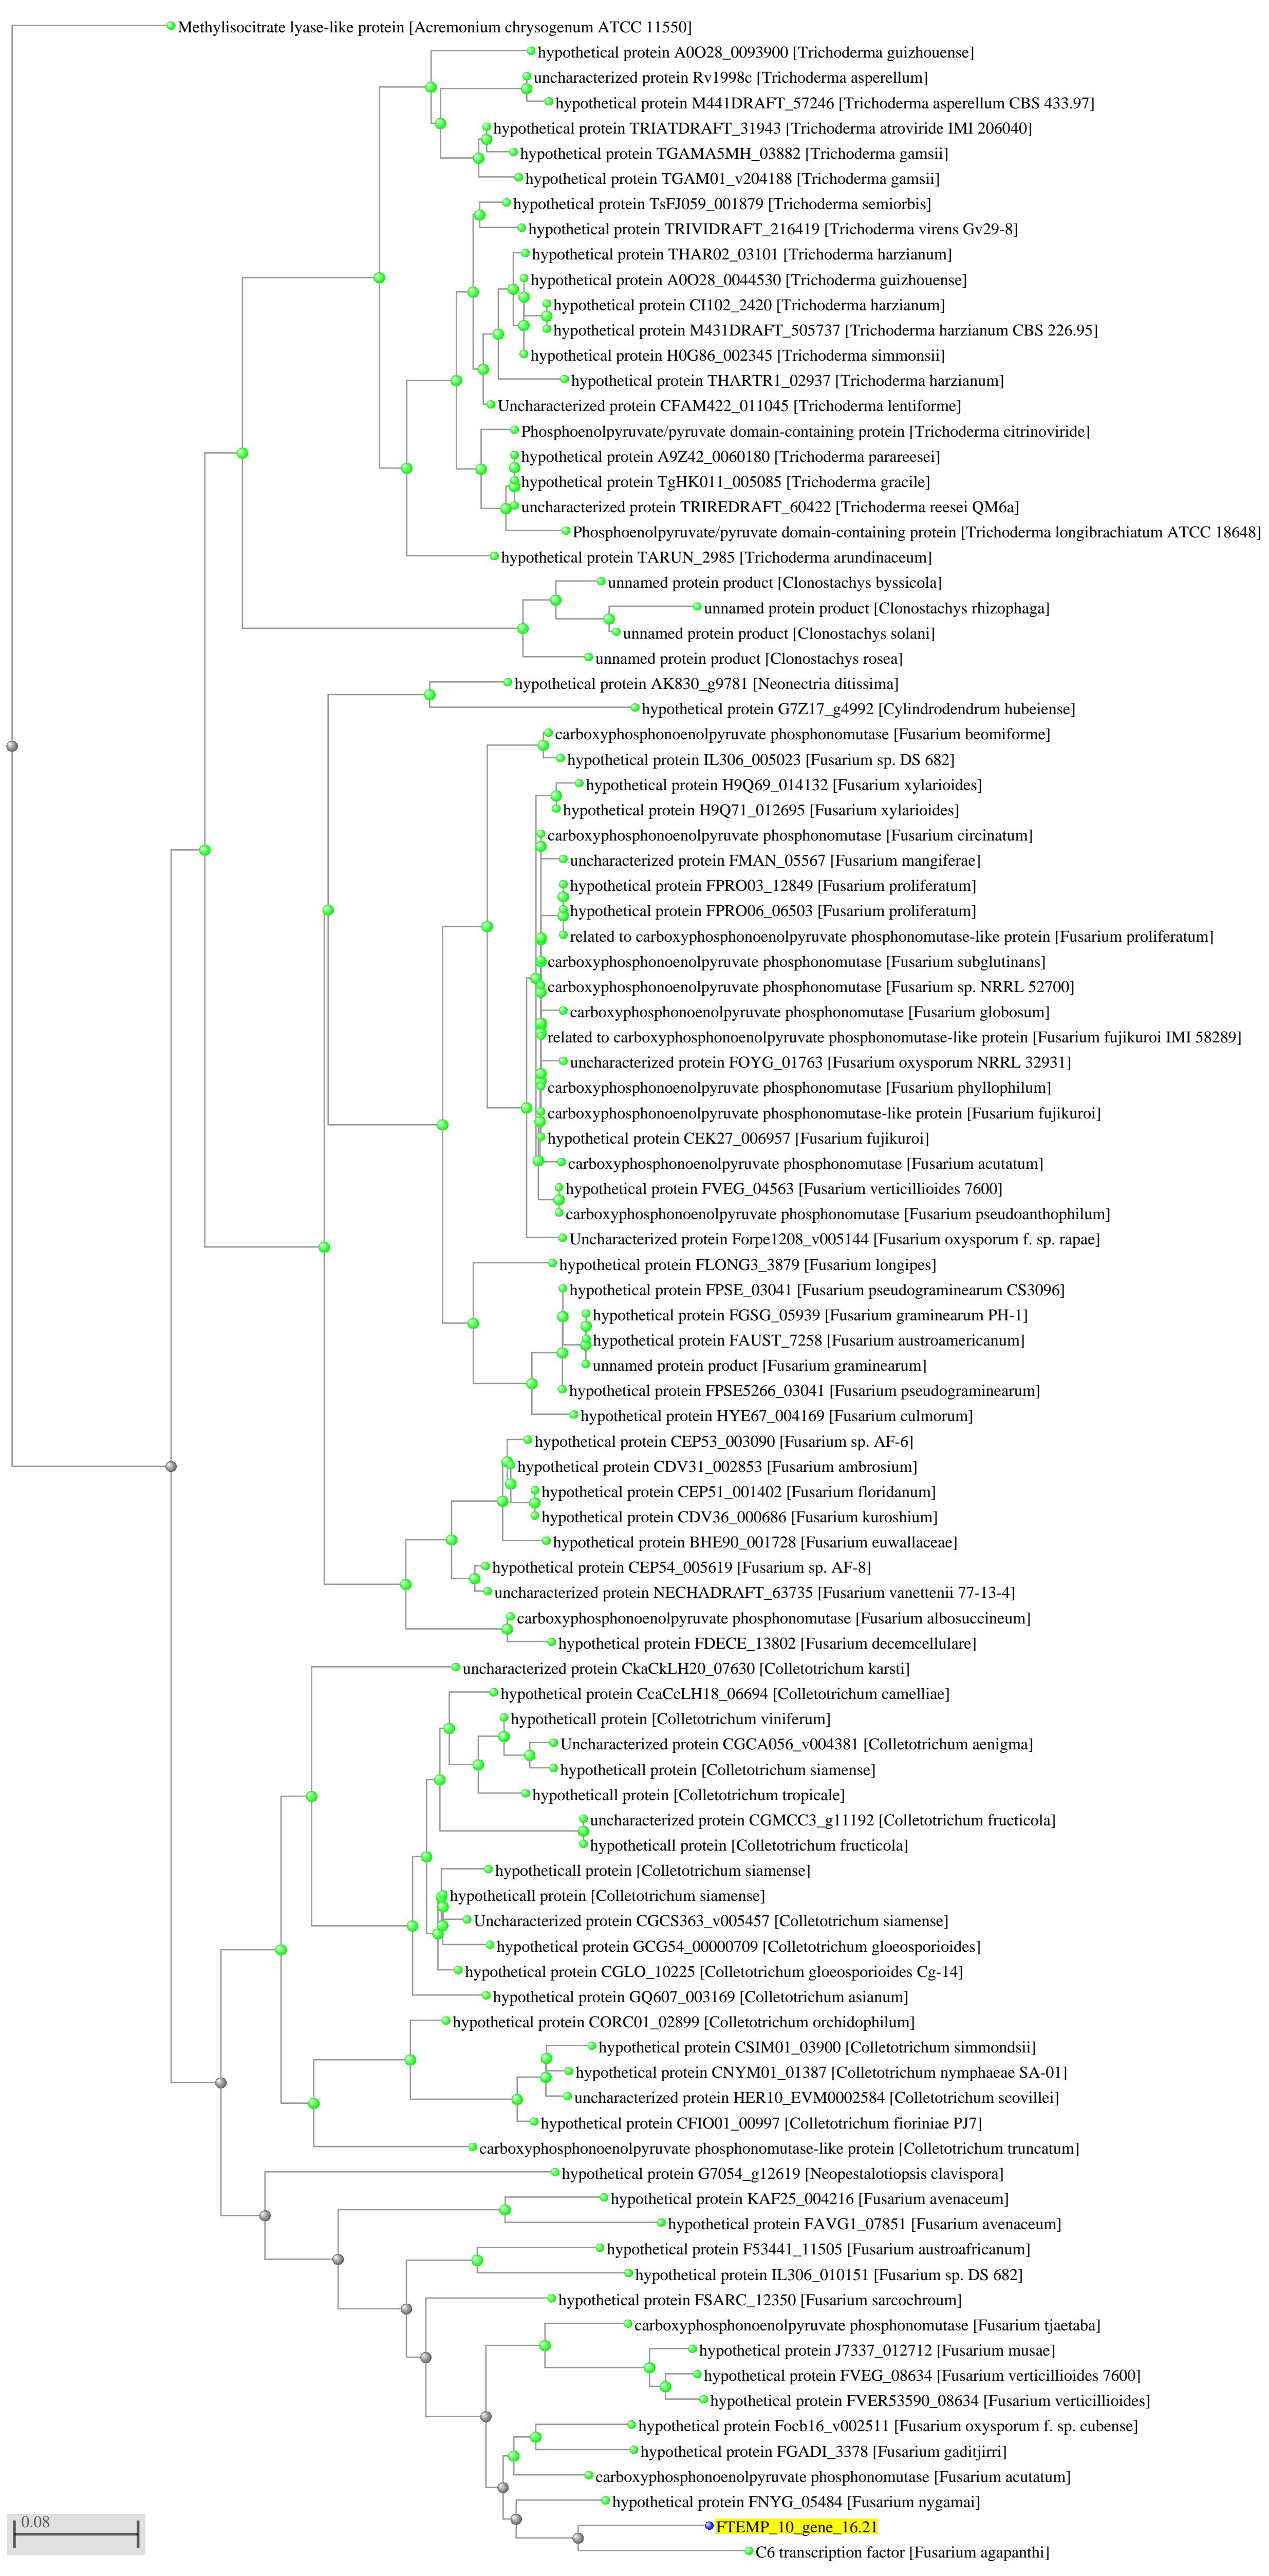

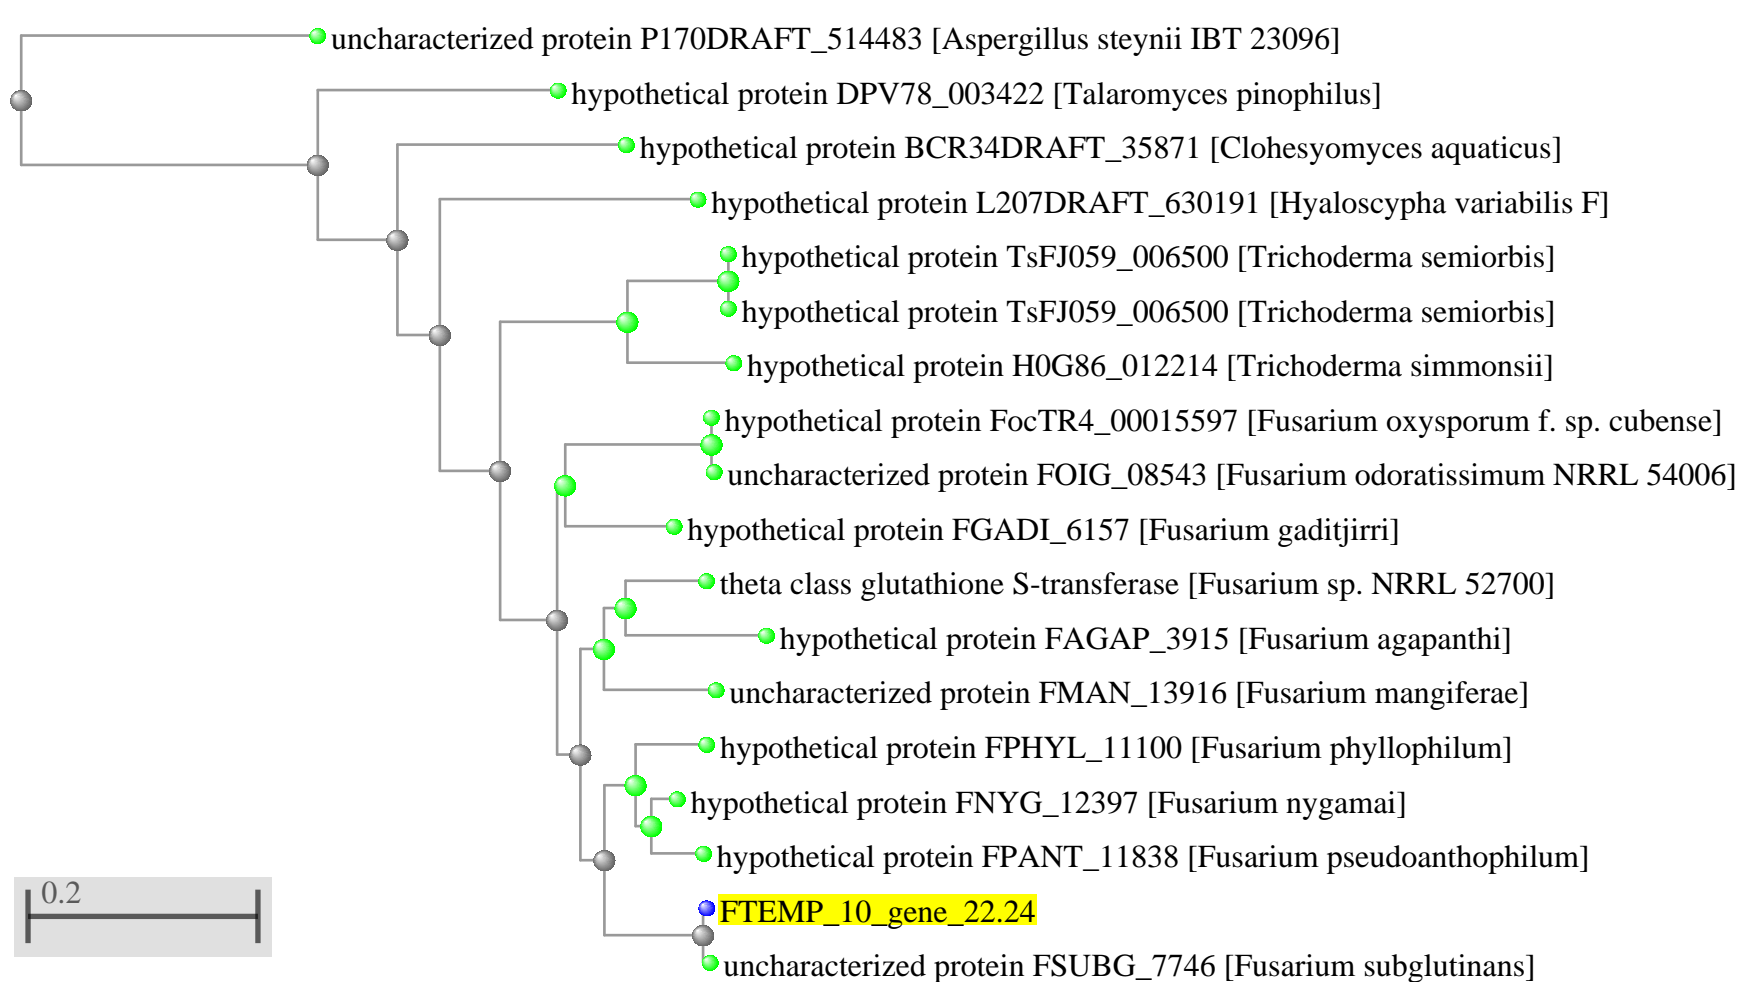



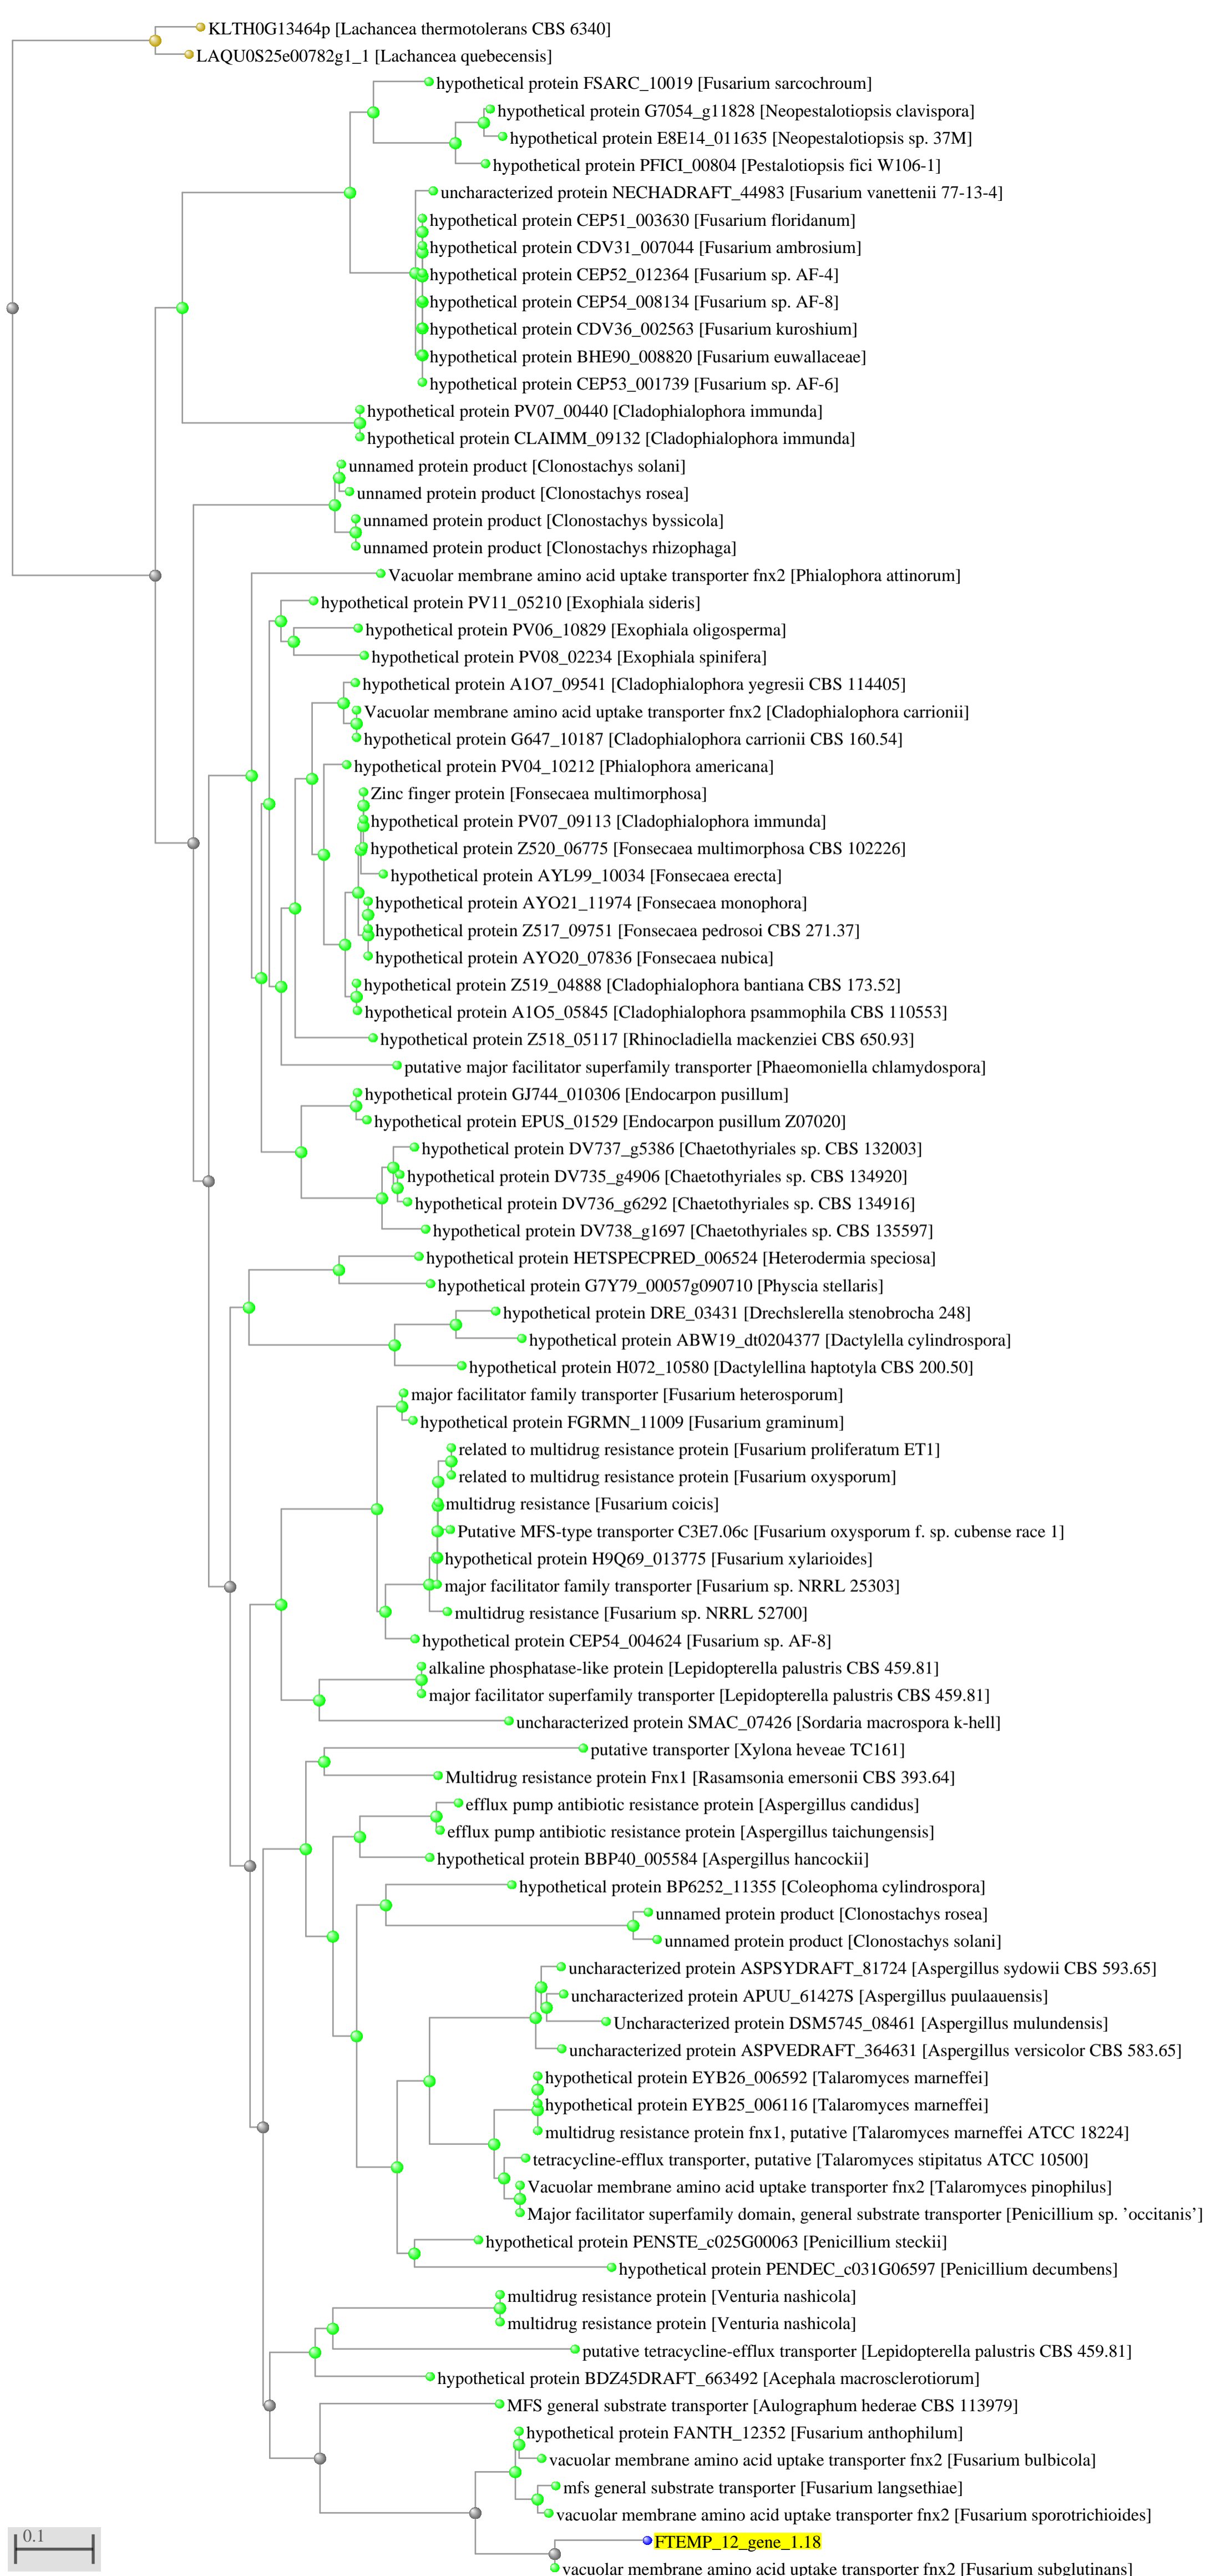

0.1

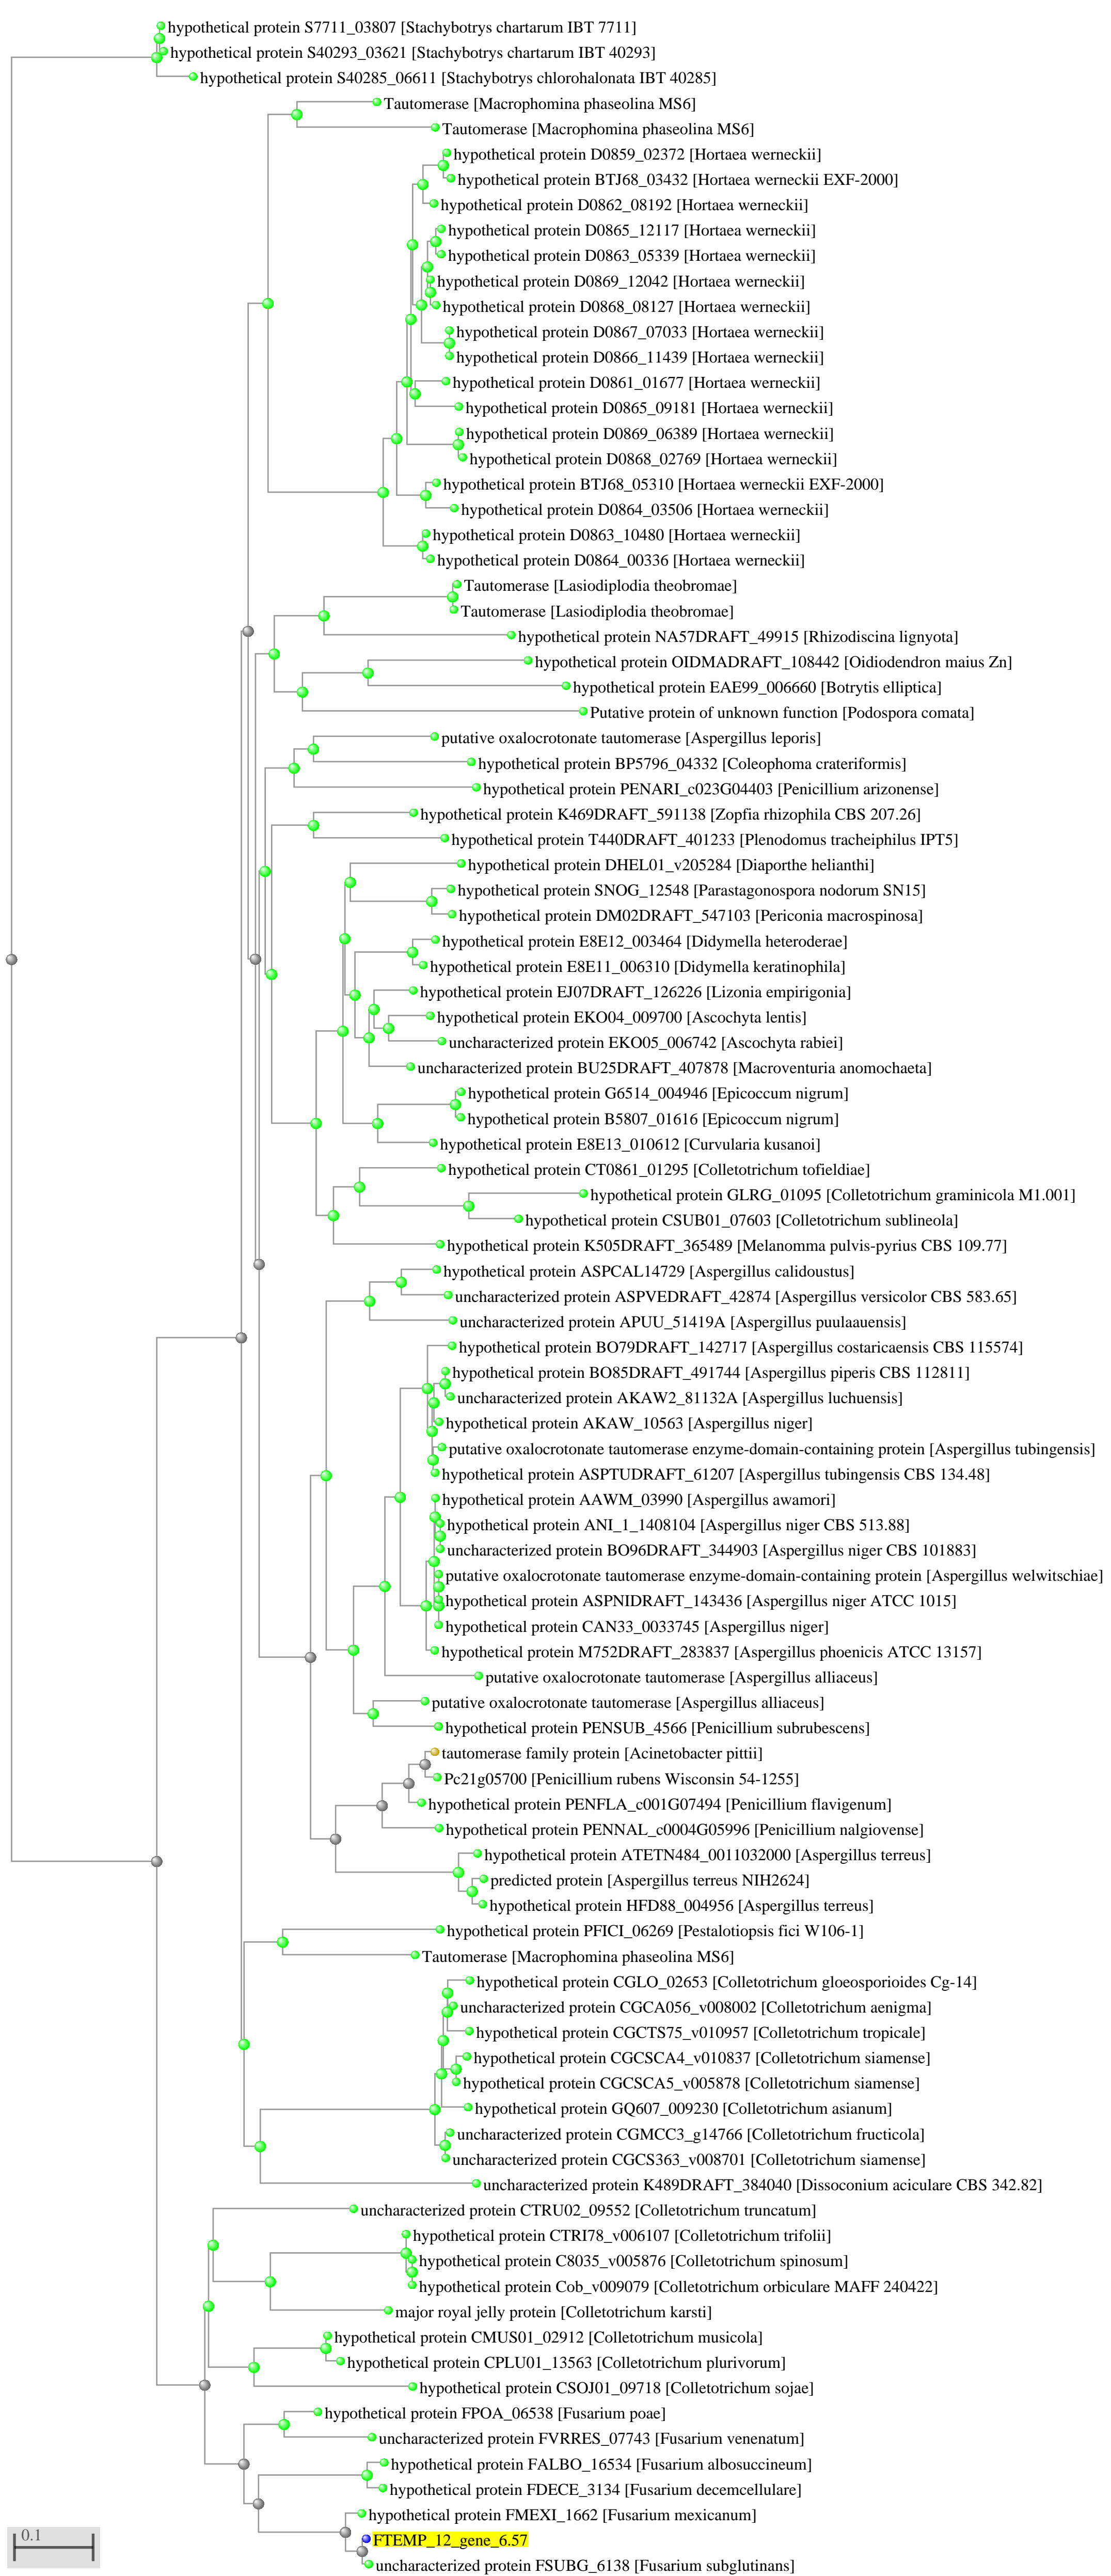

Supplement: Supplementary file 9 [file supplementary]
