# Supplementary material for: Characterization of Host-Specific Genes from Pine- and Grass-Associated Species of the <em>Fusarium Fujikuroi </em>Species Complex
Source: Preprints.org preprint supplement (doi:10.20944/preprints202207.0007.v1), 2022-07-01

**Figure S5.** Host-range-associated genes with less than 10 ancestral origin hits and mostly *Fusarium*. Host-range-associated genes investigated are highlighted in yellow; FCIR = *Fusarium circinatum* and FTEMP = *Fusarium temperatum*.

FCIR\_1\_gene\_8.74

hypothetical protein FPANT\_12286 [Fusarium pse...]

hypothetical protein FGLOB1\_1027 [Fusarium gl...]

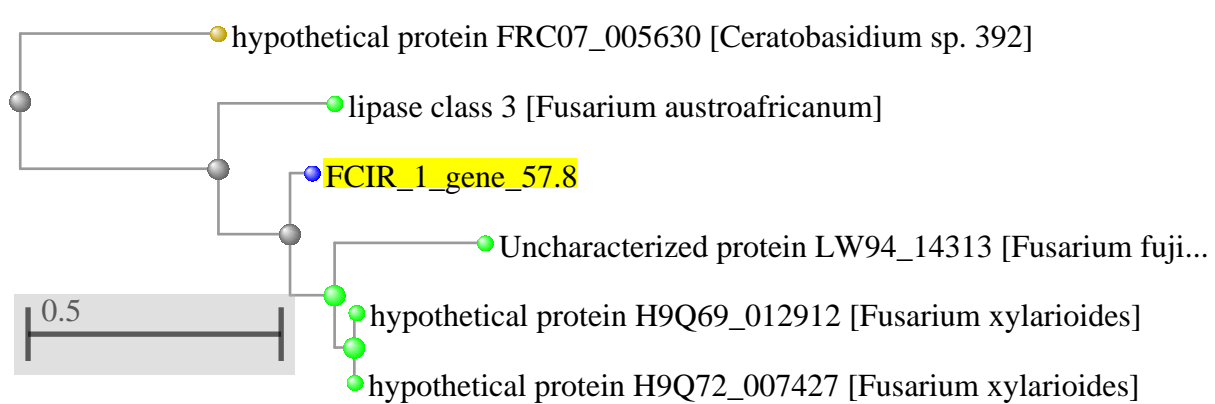

FCIR\_2\_gene\_22.10

0.005

hypothetical protein FANTH\_11905 [Fusa...

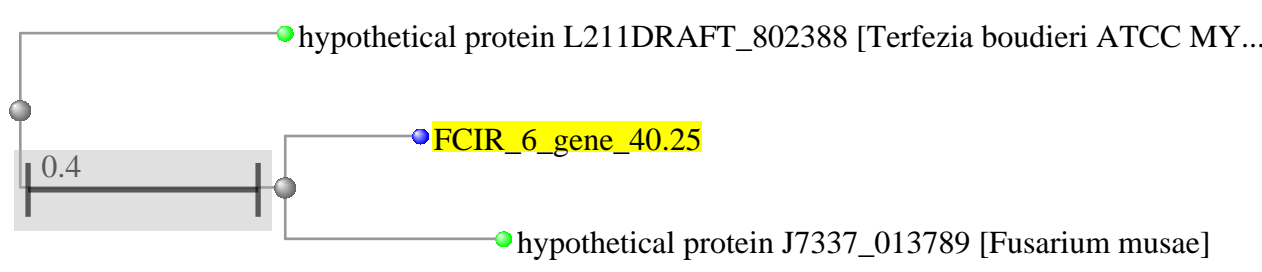

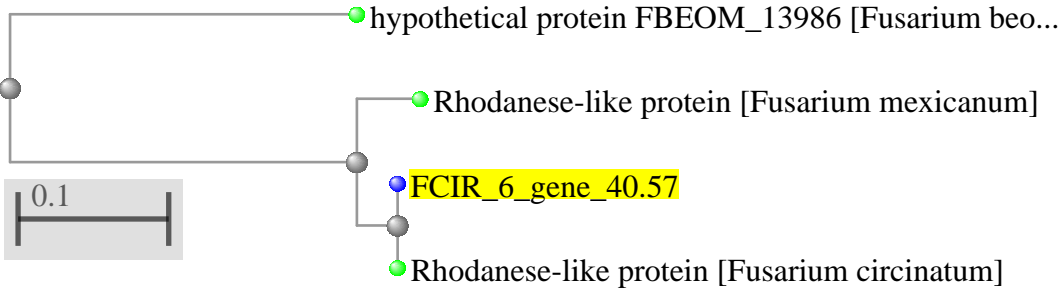

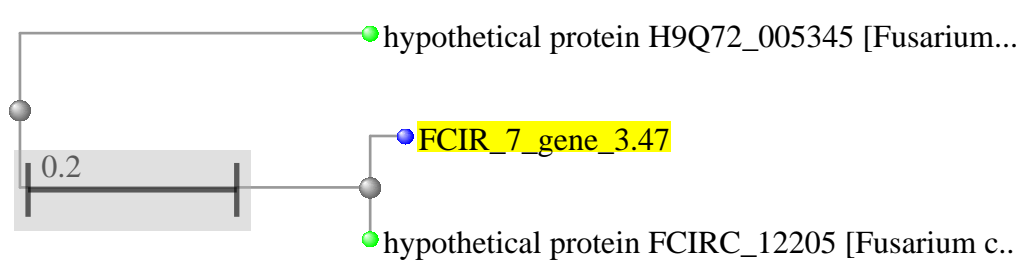

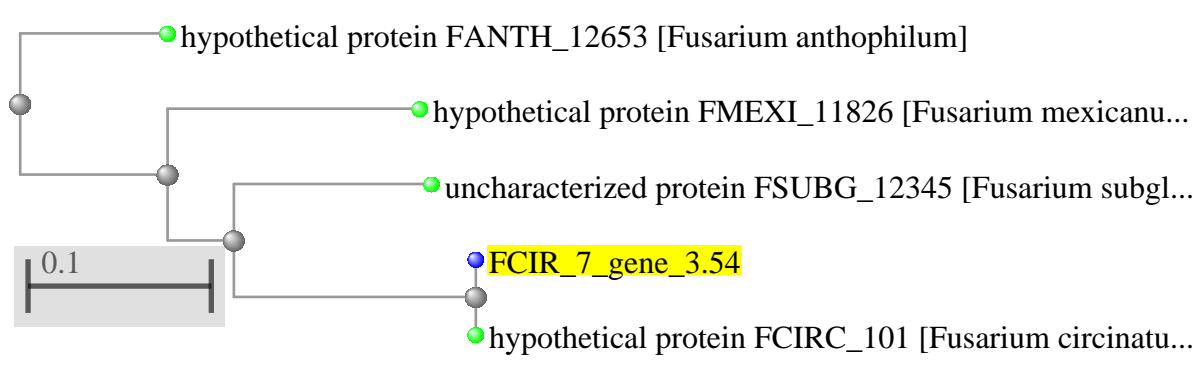



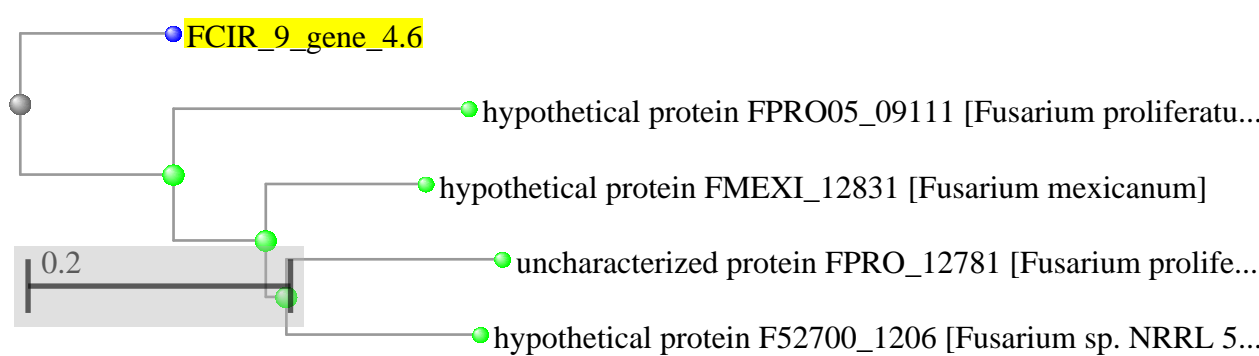

FCIR\_10\_gene\_25.32

hypothetical protein FDECE\_10509 [Fusarium d...

Zn2 Cys6 DNA-binding [Fusarium albosuccin...

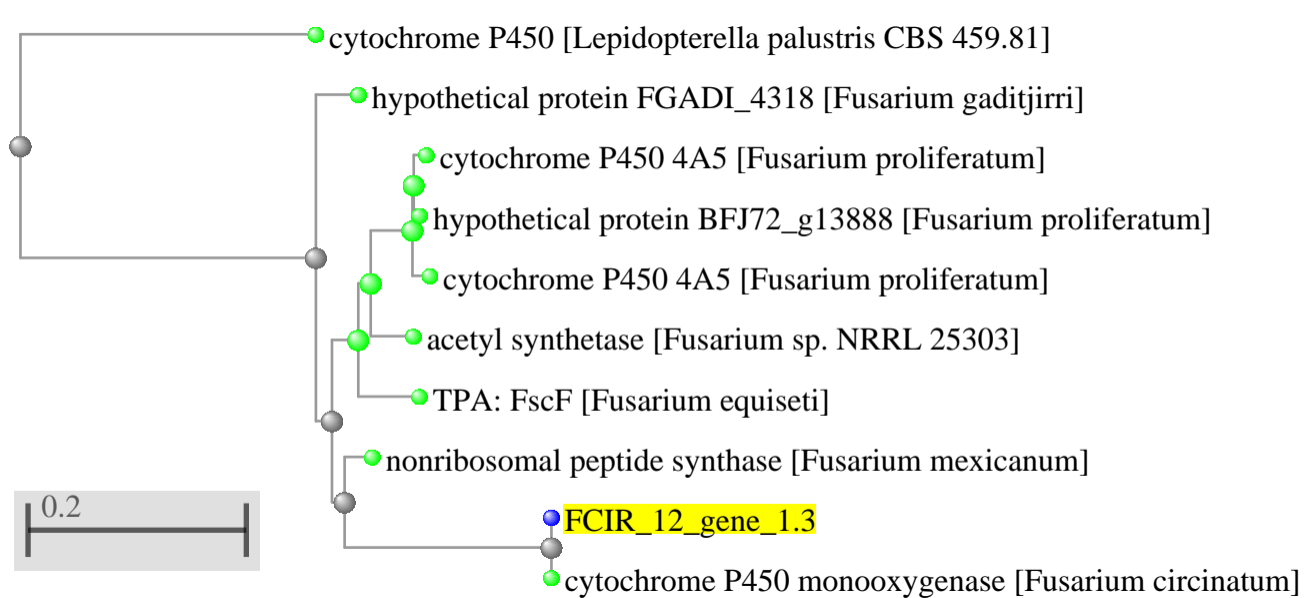

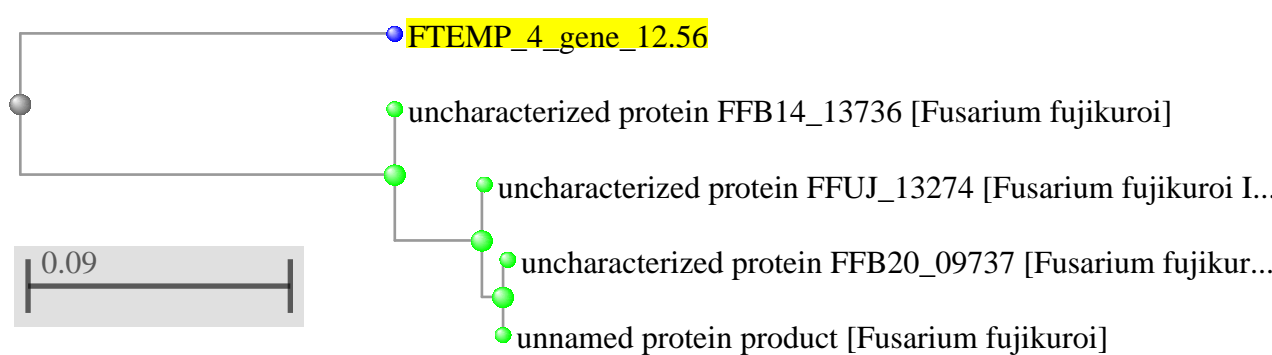

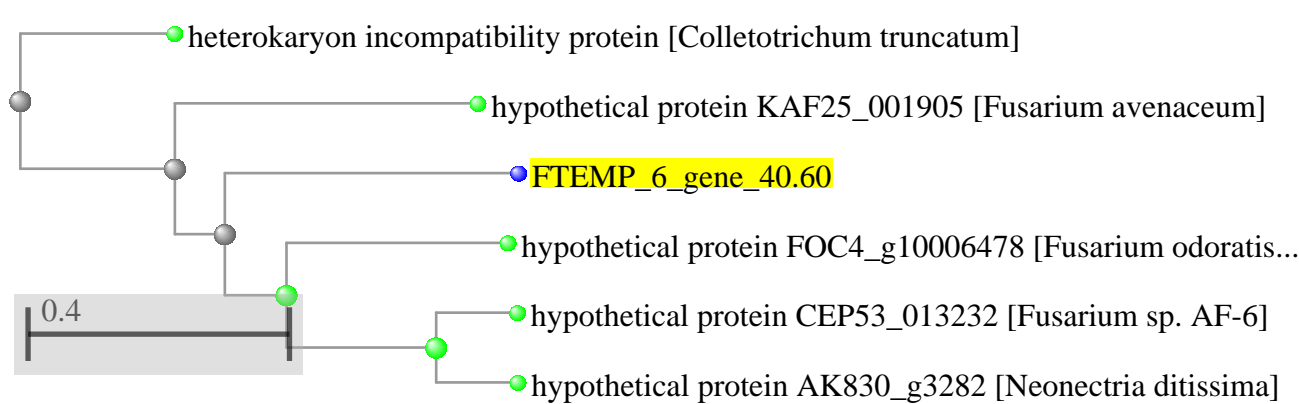

A phylogenetic tree diagram showing the evolutionary relationships between four protein sequences. The root of the tree is marked with a grey circle on the left. The first branch leads to a blue circle labeled 'FTEMP\_8\_gene\_4.70'. The second branch leads to a green circle labeled 'hypothetical protein FNYG\_05159 [Fusarium nygamai]'. The third branch leads to a green circle labeled 'uncharacterized protein FFUJ\_13944 [Fusarium fujiku...]', which then splits into two branches leading to green circles labeled 'hypothetical protein CEK27\_011680 [Fusarium fujiku...]' and another green circle. A scale bar at the bottom left indicates a distance of 0.2.

FTEMP\_8\_gene\_4.70

hypothetical protein FNYG\_05159 [Fusarium nygamai]

uncharacterized protein FFUJ\_13944 [Fusarium fujiku...]

hypothetical protein CEK27\_011680 [Fusarium fujiku...]

0.2

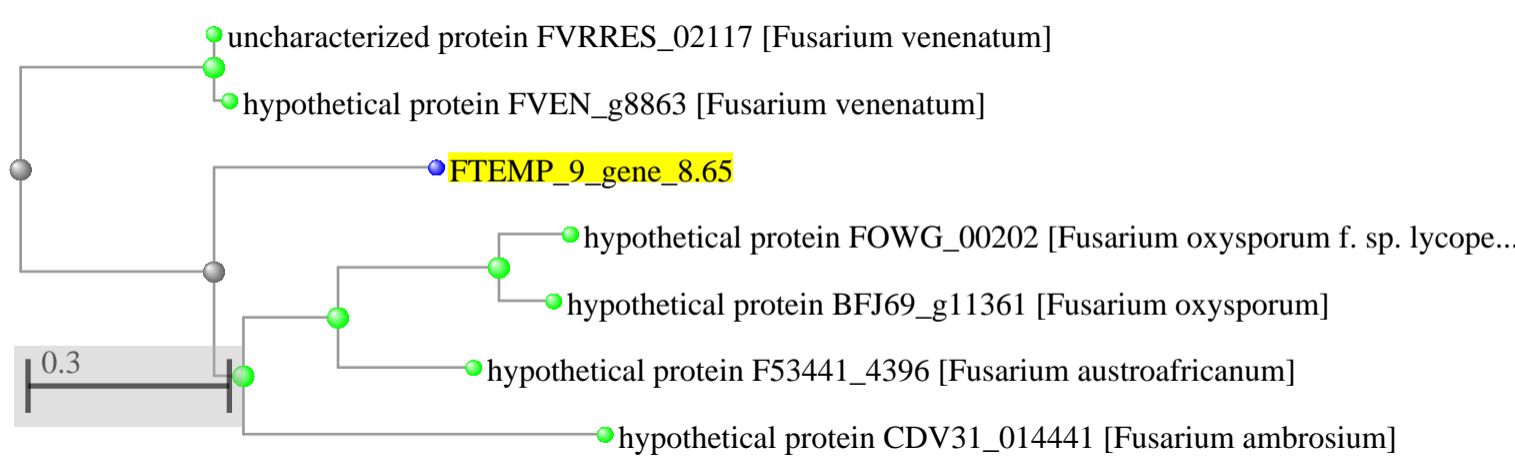

FTEMP\_10\_gene\_5.111

related to VBA1-Vacuolar Basic Amino acid transporter [Fusarium proliferatu...]

related to VBA1-Vacuolar Basic Amino acid transporter [Fusarium fujikuroi]

uncharacterized protein FMAN\_01969 [Fusarium mangiferae]

related to VBA1-Vacuolar Basic Amino acid transporter [Fusarium fujikuroi ...]

related to VBA1-Vacuolar Basic Amino acid transporter [Fusarium fujikuroi]

unnamed protein product [Fusarium fujikuroi]

unnamed protein product [Fusarium fujikuroi]

related to VBA1-Vacuolar Basic Amino acid transporter [Fusarium fujikuroi]

0.1



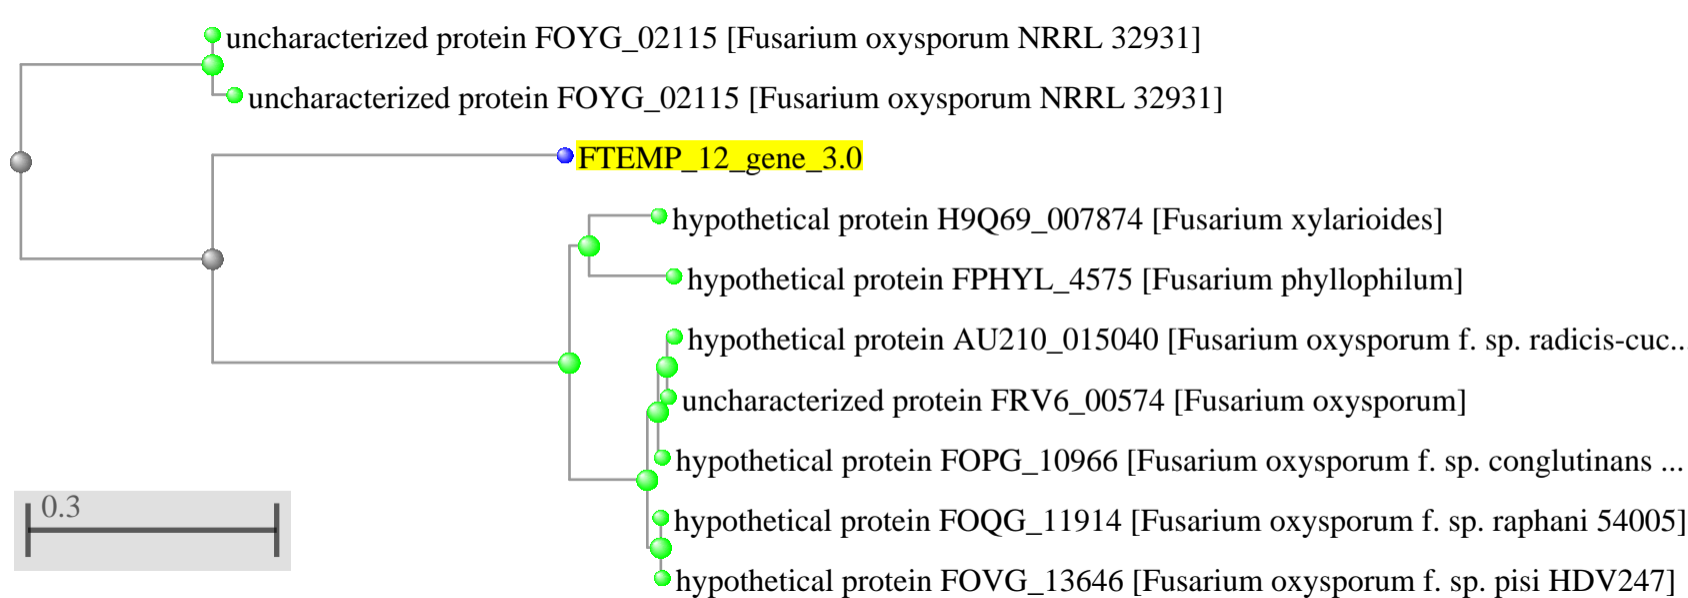

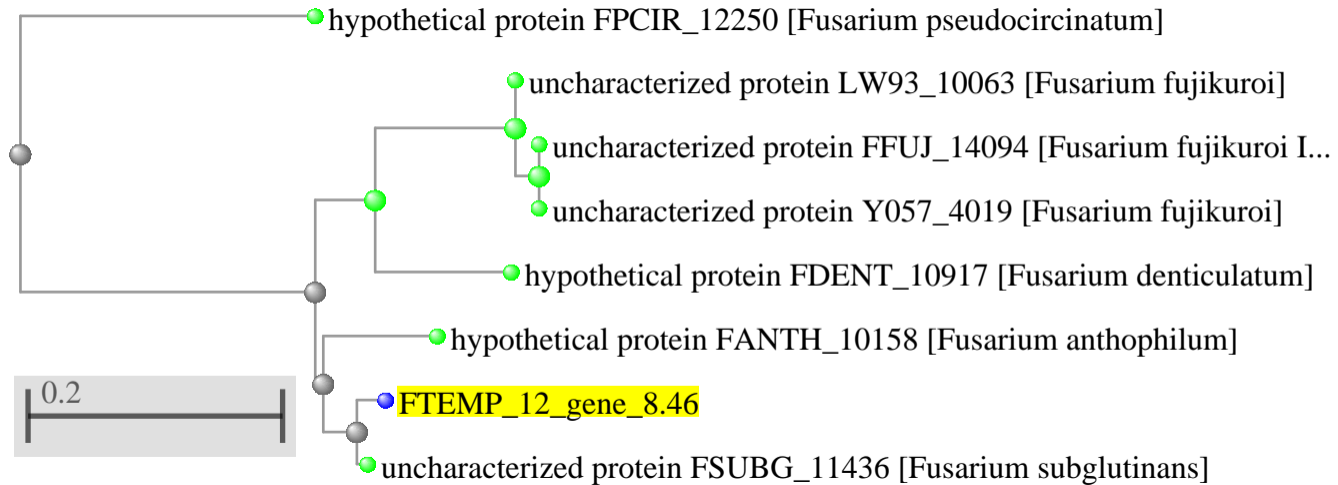

Supplement: Supplementary file 4 [file supplementary]
