# Supplementary material for: Characterization of Host-Specific Genes from Pine- and Grass-Associated Species of the <em>Fusarium Fujikuroi </em>Species Complex
Source: Preprints.org preprint supplement (doi:10.20944/preprints202207.0007.v1), 2022-07-01
Supplement: Supplementary file 1 [file Table S10.xlsx]

## Sheet: Table S10
Table S10. The gene information for the unique F. temperatum genes, in terms of chromosome location, subtelomeric placement, ancestral origin and BLAST description.
Chromosome	Number of genes in subtolemeric regions and gene information
	Fusarium temperatum	Gene name(s)	Ancestral origin group	BLAST description*
1	1	FTEMP_1_gene_3.65	2	Virulence factor
2	0	-	-	-
3	1	FTEMP_3_gene_24.5	8	No hit
4	3	FTEMP_4_gene_3.104	3	Hypothetical protein
		FTEMP_4_gene_41.77	6	HET domain
		FTEMP_4_gene_42.133	1	Uncharacterized protein
5	2	FTEMP_5_gene_43.12	1	Major facillitator superfamily transporters
		FTEMP_5_gene_44.124	8	Virulence factor
6	1	FTEMP_6_gene_40.60	4	Virulence factor
7	3	FTEMP_7_gene_0.4	3	Virulence factor
		FTEMP_7_gene_0.54	8	Virulence factor
		FTEMP_7_gene_33.90	8	Virulence factor
8	4	FTEMP_8_gene_29.50	1	Virulence factor
		FTEMP_8_gene_3.96	1	Uncharacterized protein
		FTEMP_8_gene_4.145	1	Uncharacterized protein
		FTEMP_8_gene_4.70	4	Predicted
9	0	-	-	-
10	5	FTEMP_10_gene_22.24	1	Hypothetical protein
		FTEMP_10_gene_4.5	8	Uncharacterized protein
		FTEMP_10_gene_4.59	1	Metabolism
		FTEMP_10_gene_5.111	4	Major facillitator superfamily transporters
		FTEMP_10_gene_5.23	7	Virulence factor
11	0	-	-	-
12	10	FTEMP_12_gene_1.18	1	Major facillitator superfamily transporters
		FTEMP_12_gene_3.0	4	Uncharacterized protein
		FTEMP_12_gene_3.47	2	Hypothetical protein
		FTEMP_12_gene_3.74	5	HET domain
		FTEMP_12_gene_4.36	6	Virulence factor
		FTEMP_12_gene_4.41	8	Virulence factor
		FTEMP_12_gene_4.72	8	No hit
		FTEMP_12_gene_6.57	1	Predicted
		FTEMP_12_gene_8.46	4	Uncharacterized protein
		FTEMP_12_gene_8.89	8	Virulence factor
*GO terms information obtained from Table S5
