# Supplementary material for: Characterization of Host-Specific Genes from Pine- and Grass-Associated Species of the <em>Fusarium Fujikuroi </em>Species Complex
Source: Preprints.org preprint supplement (doi:10.20944/preprints202207.0007.v1), 2022-07-01

**Figure S3.** Host-range-associated genes with ancestral origins that emerged within the FFSC and FOSC. Host-range-associated genes investigated are highlighted in yellow; FCIR = *Fusarium circinatum* and FTEMP = *Fusarium temperatum*.

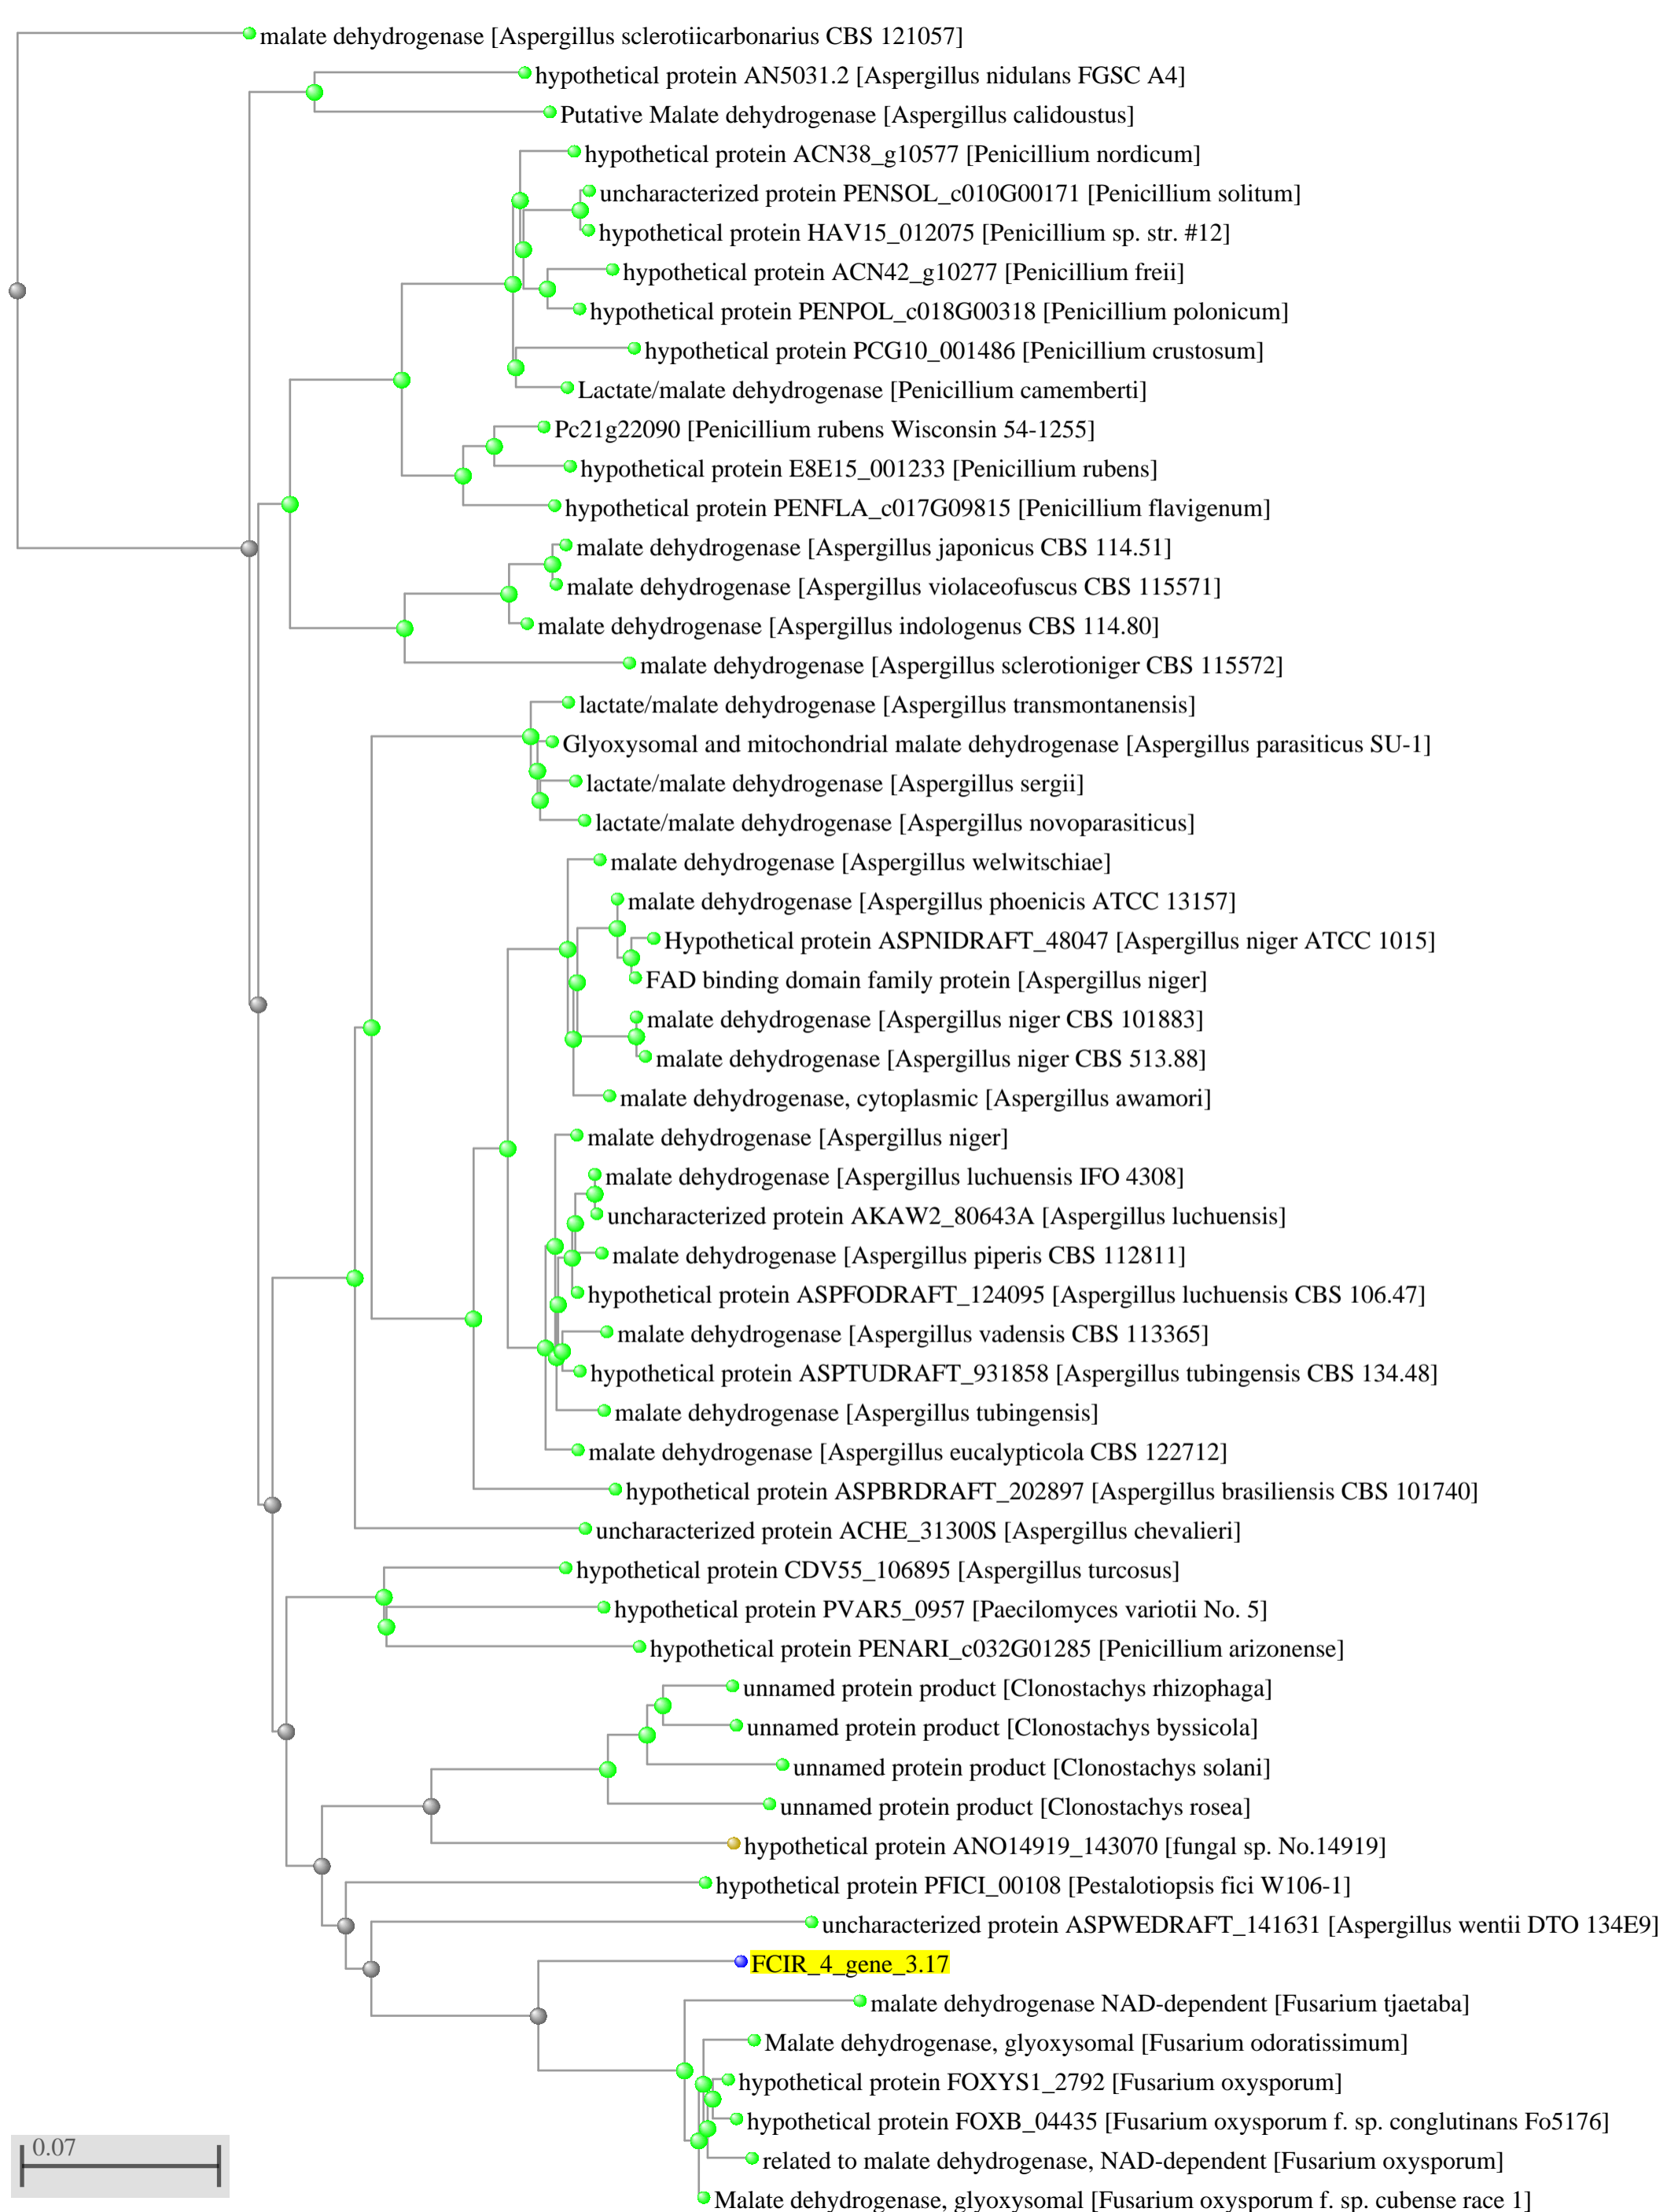

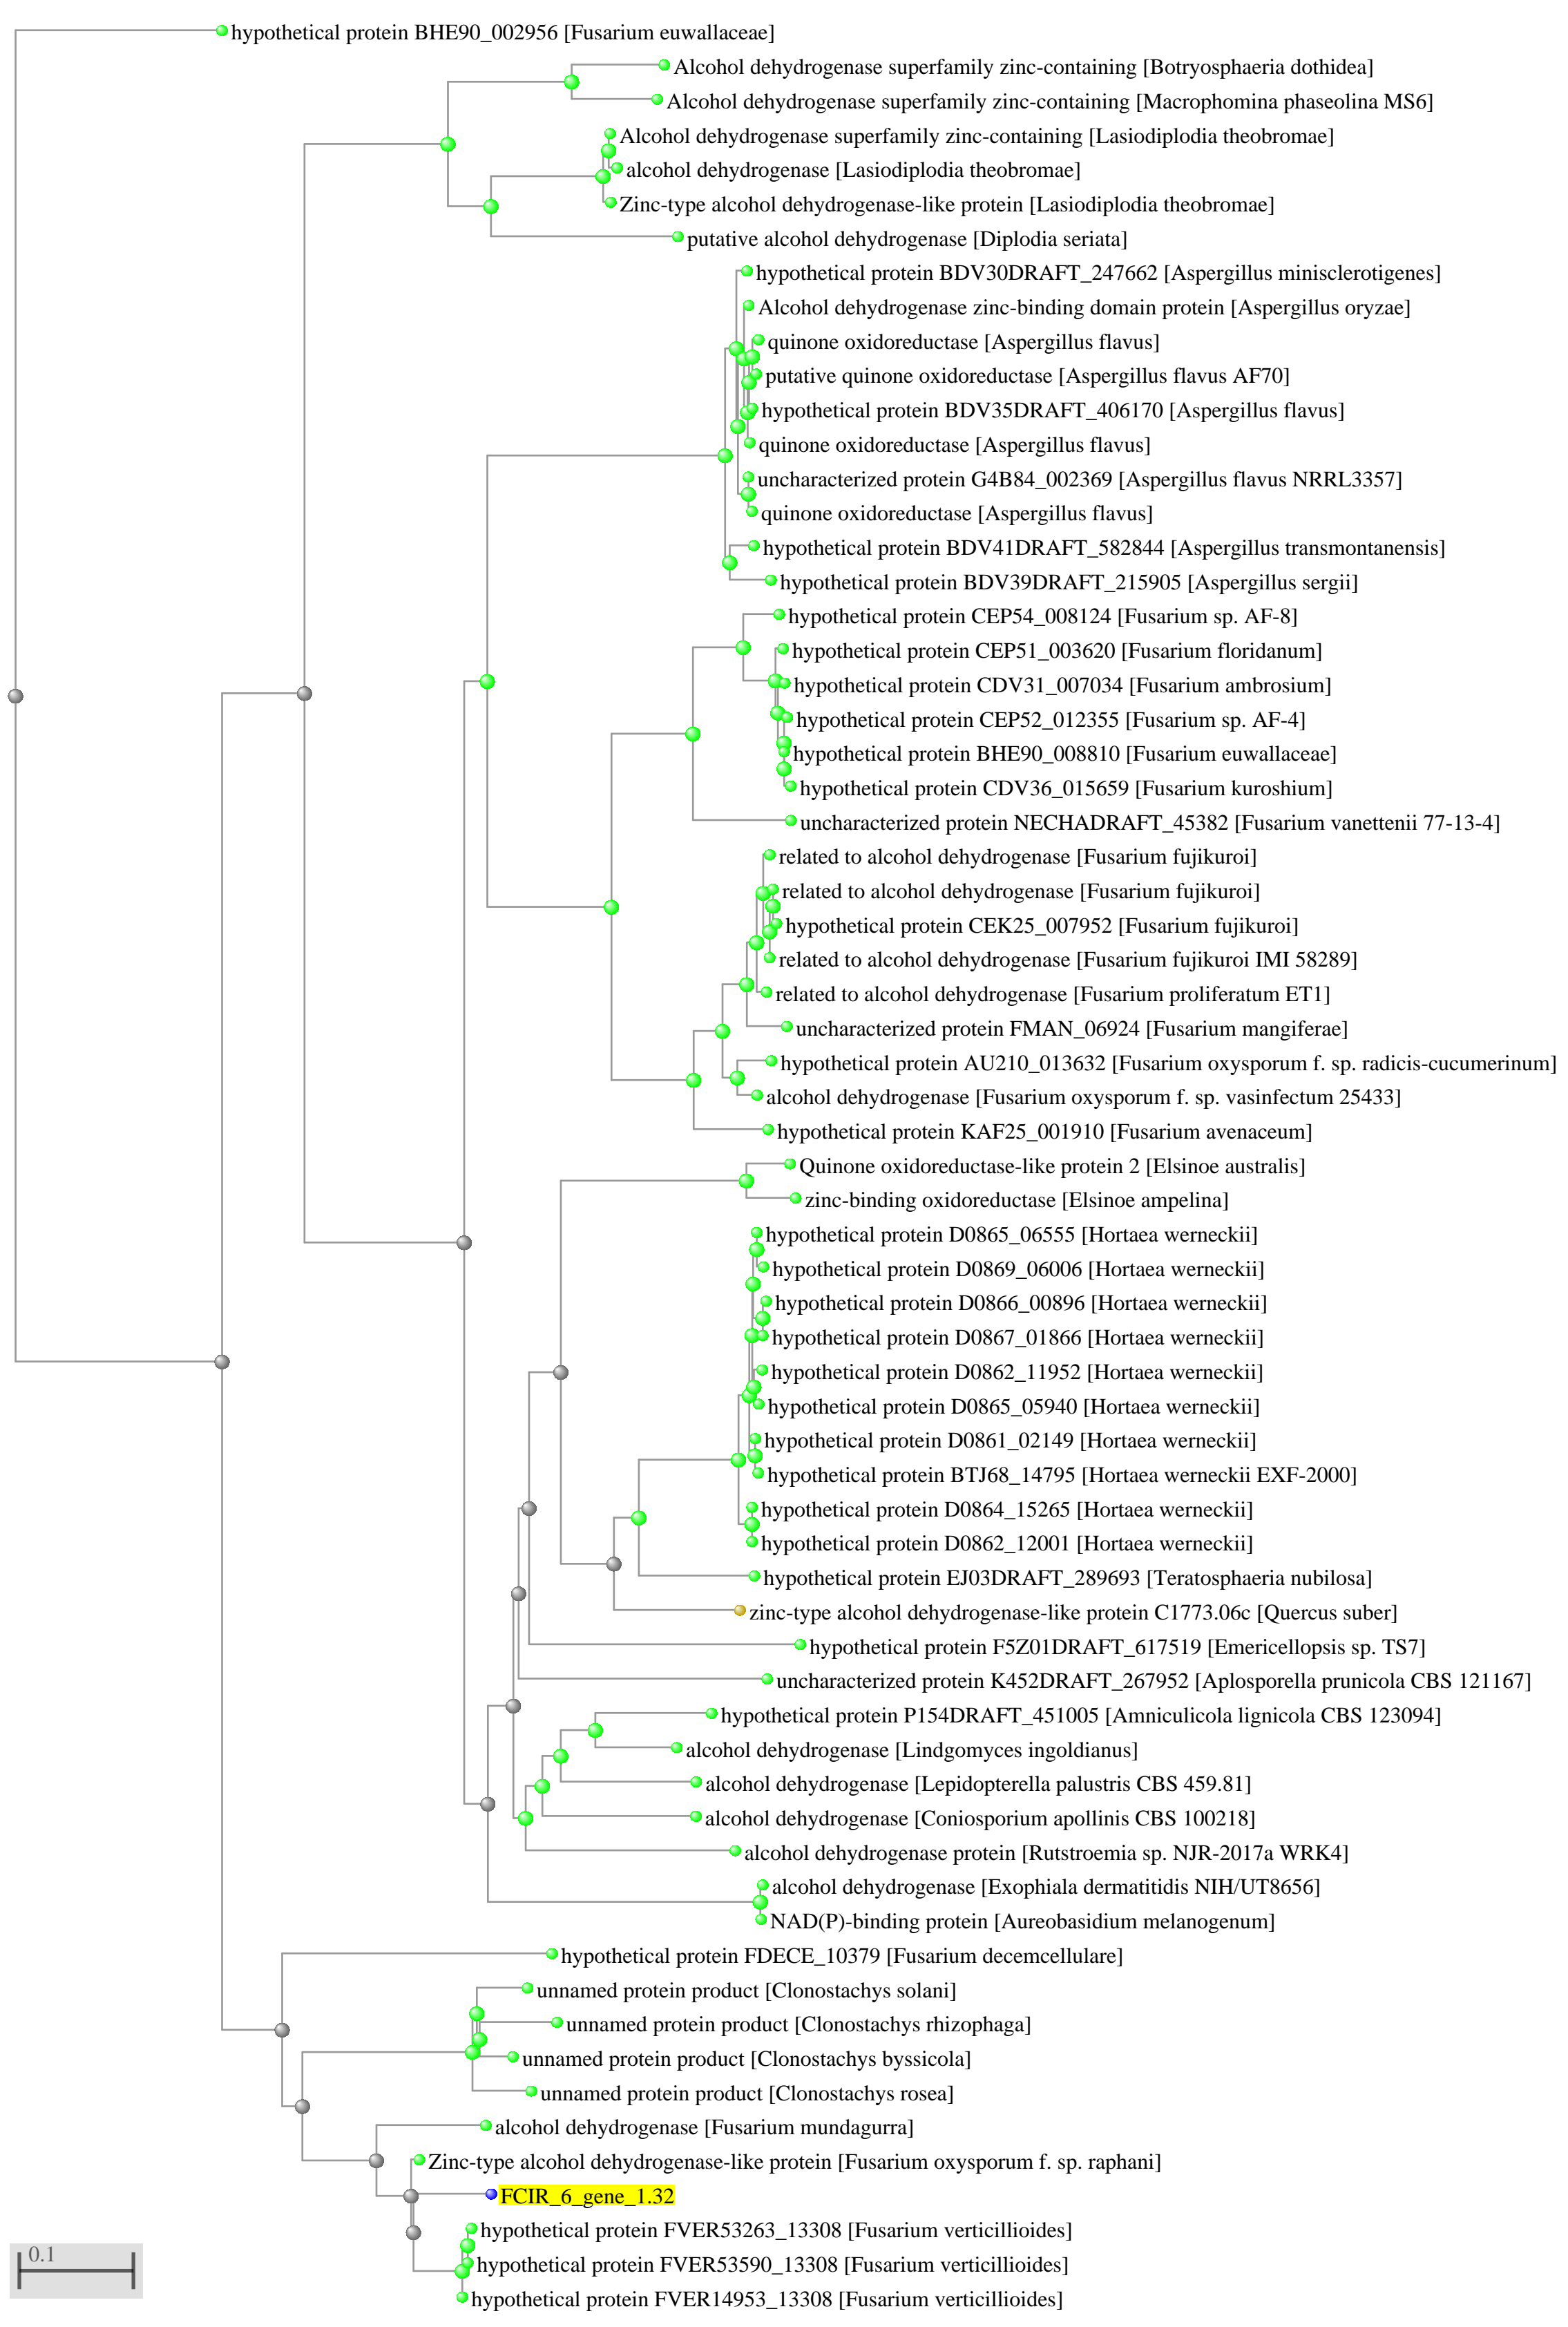

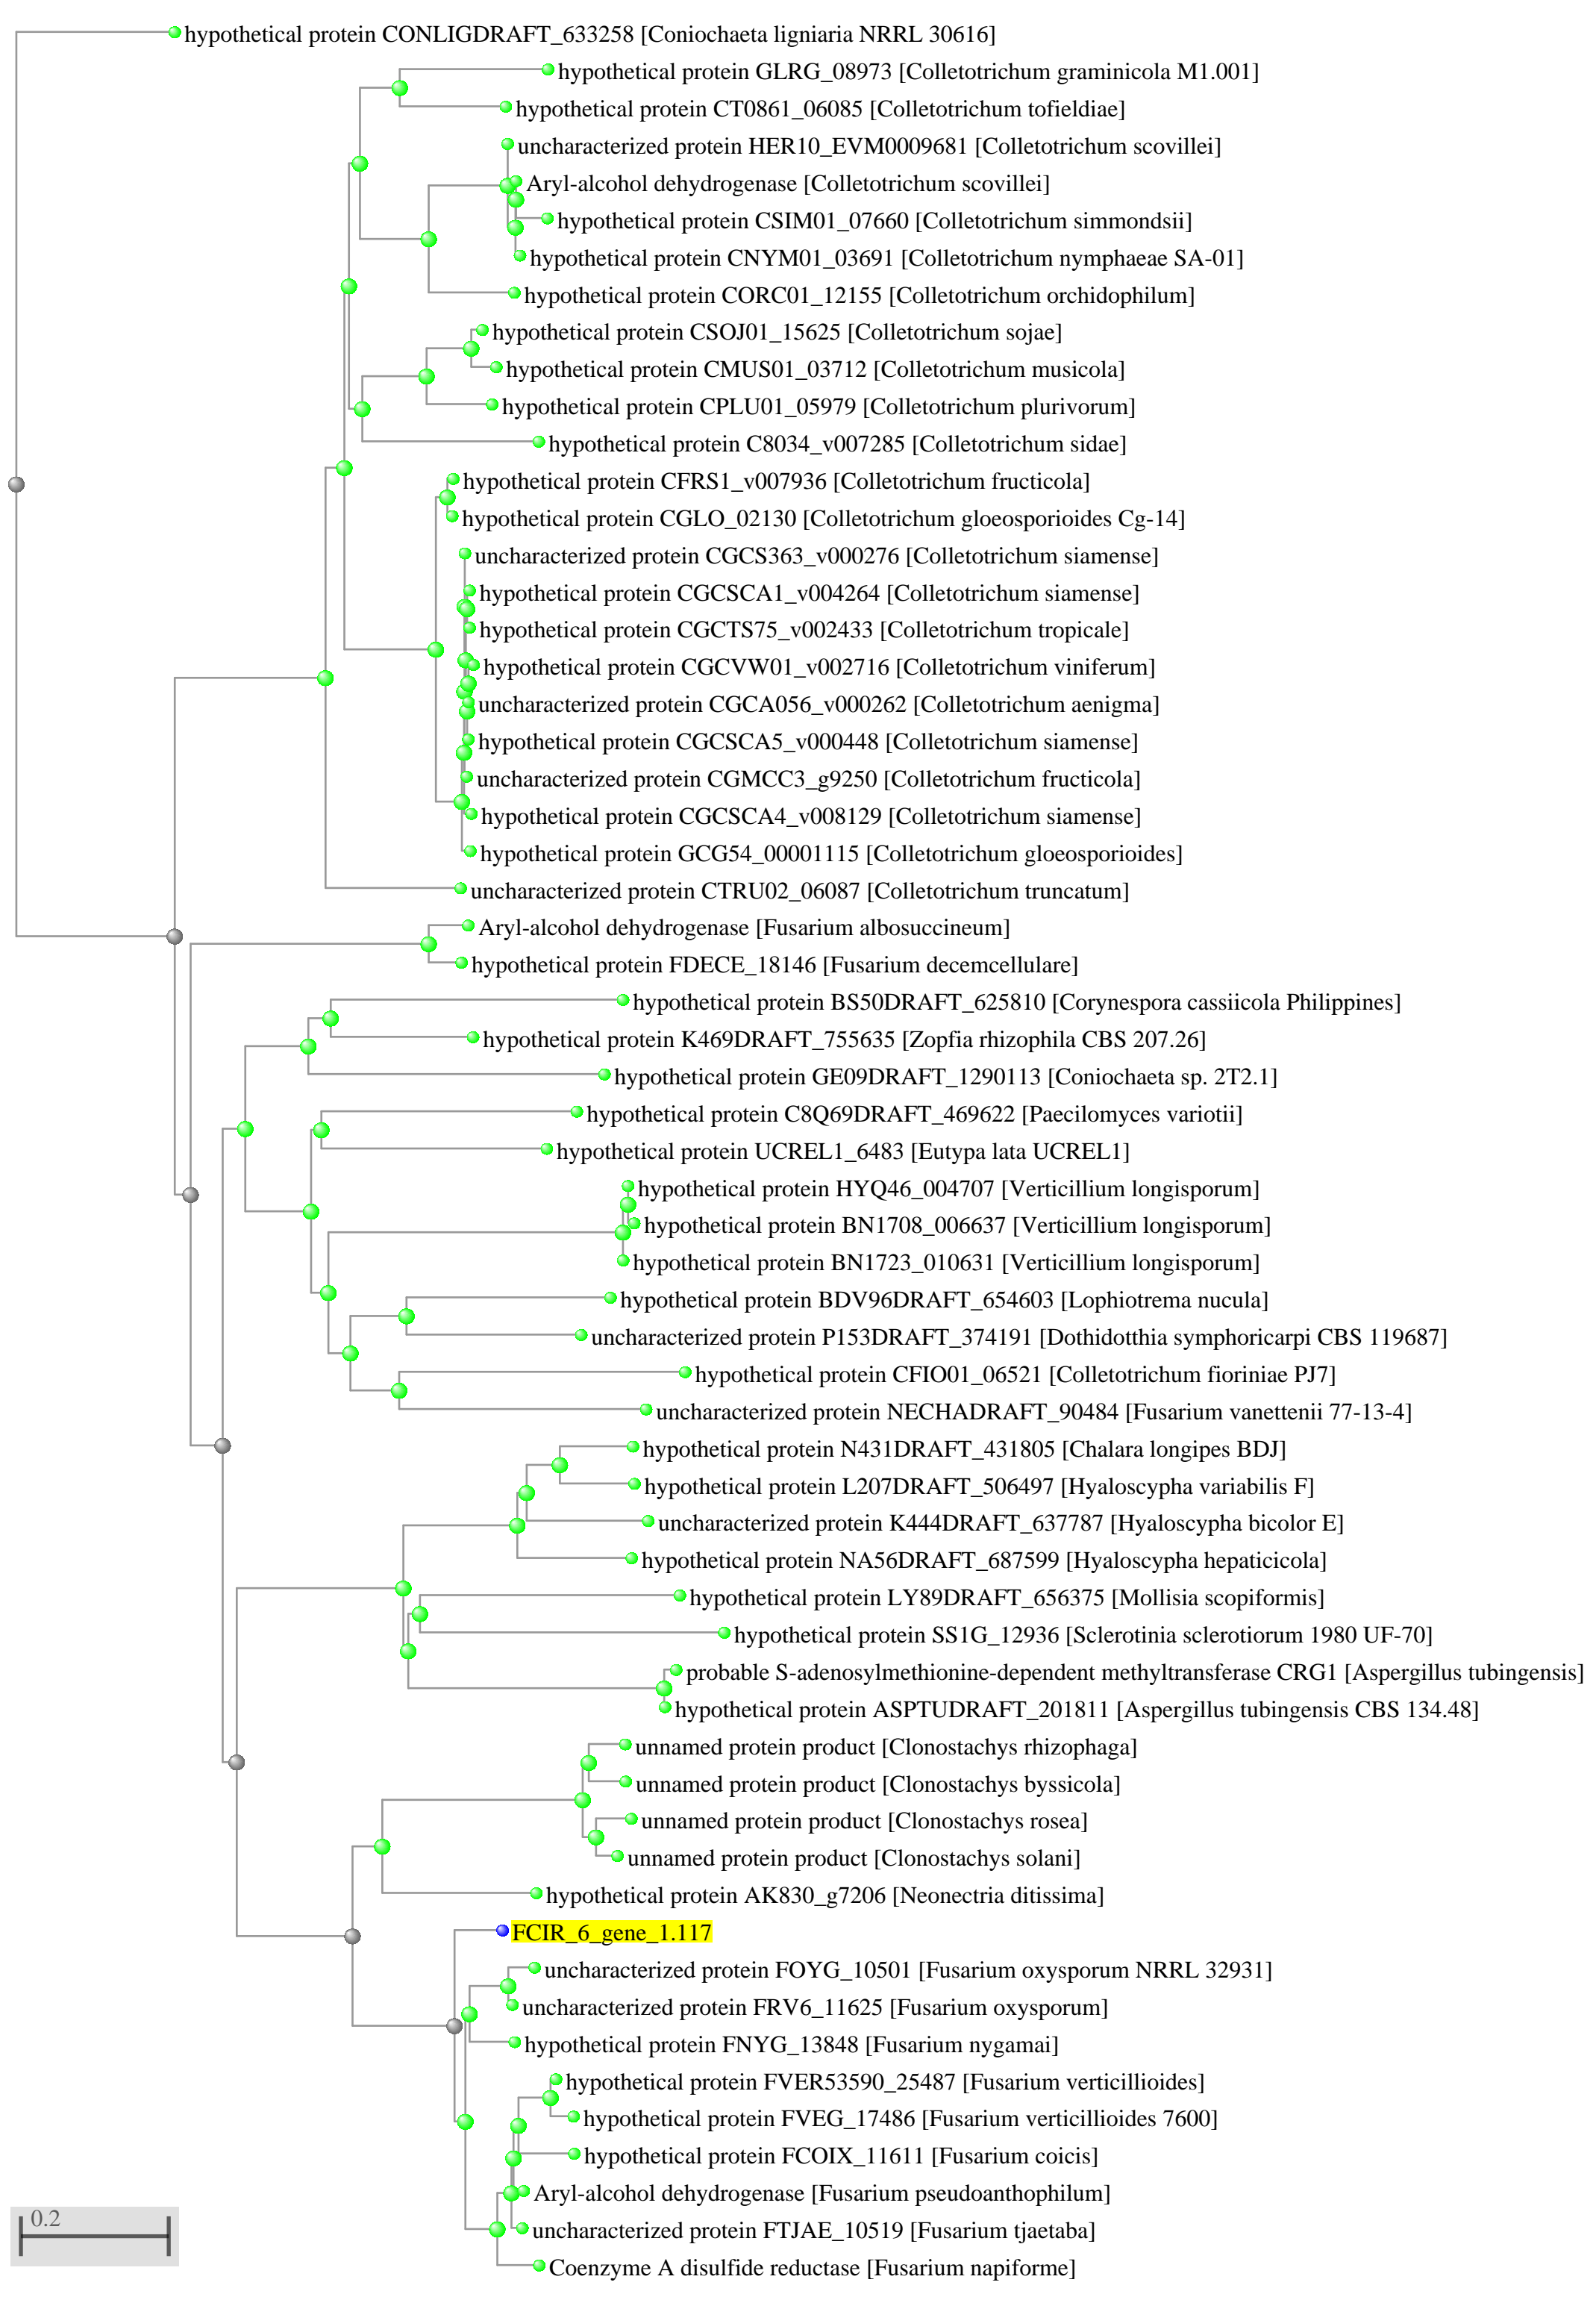

0.2



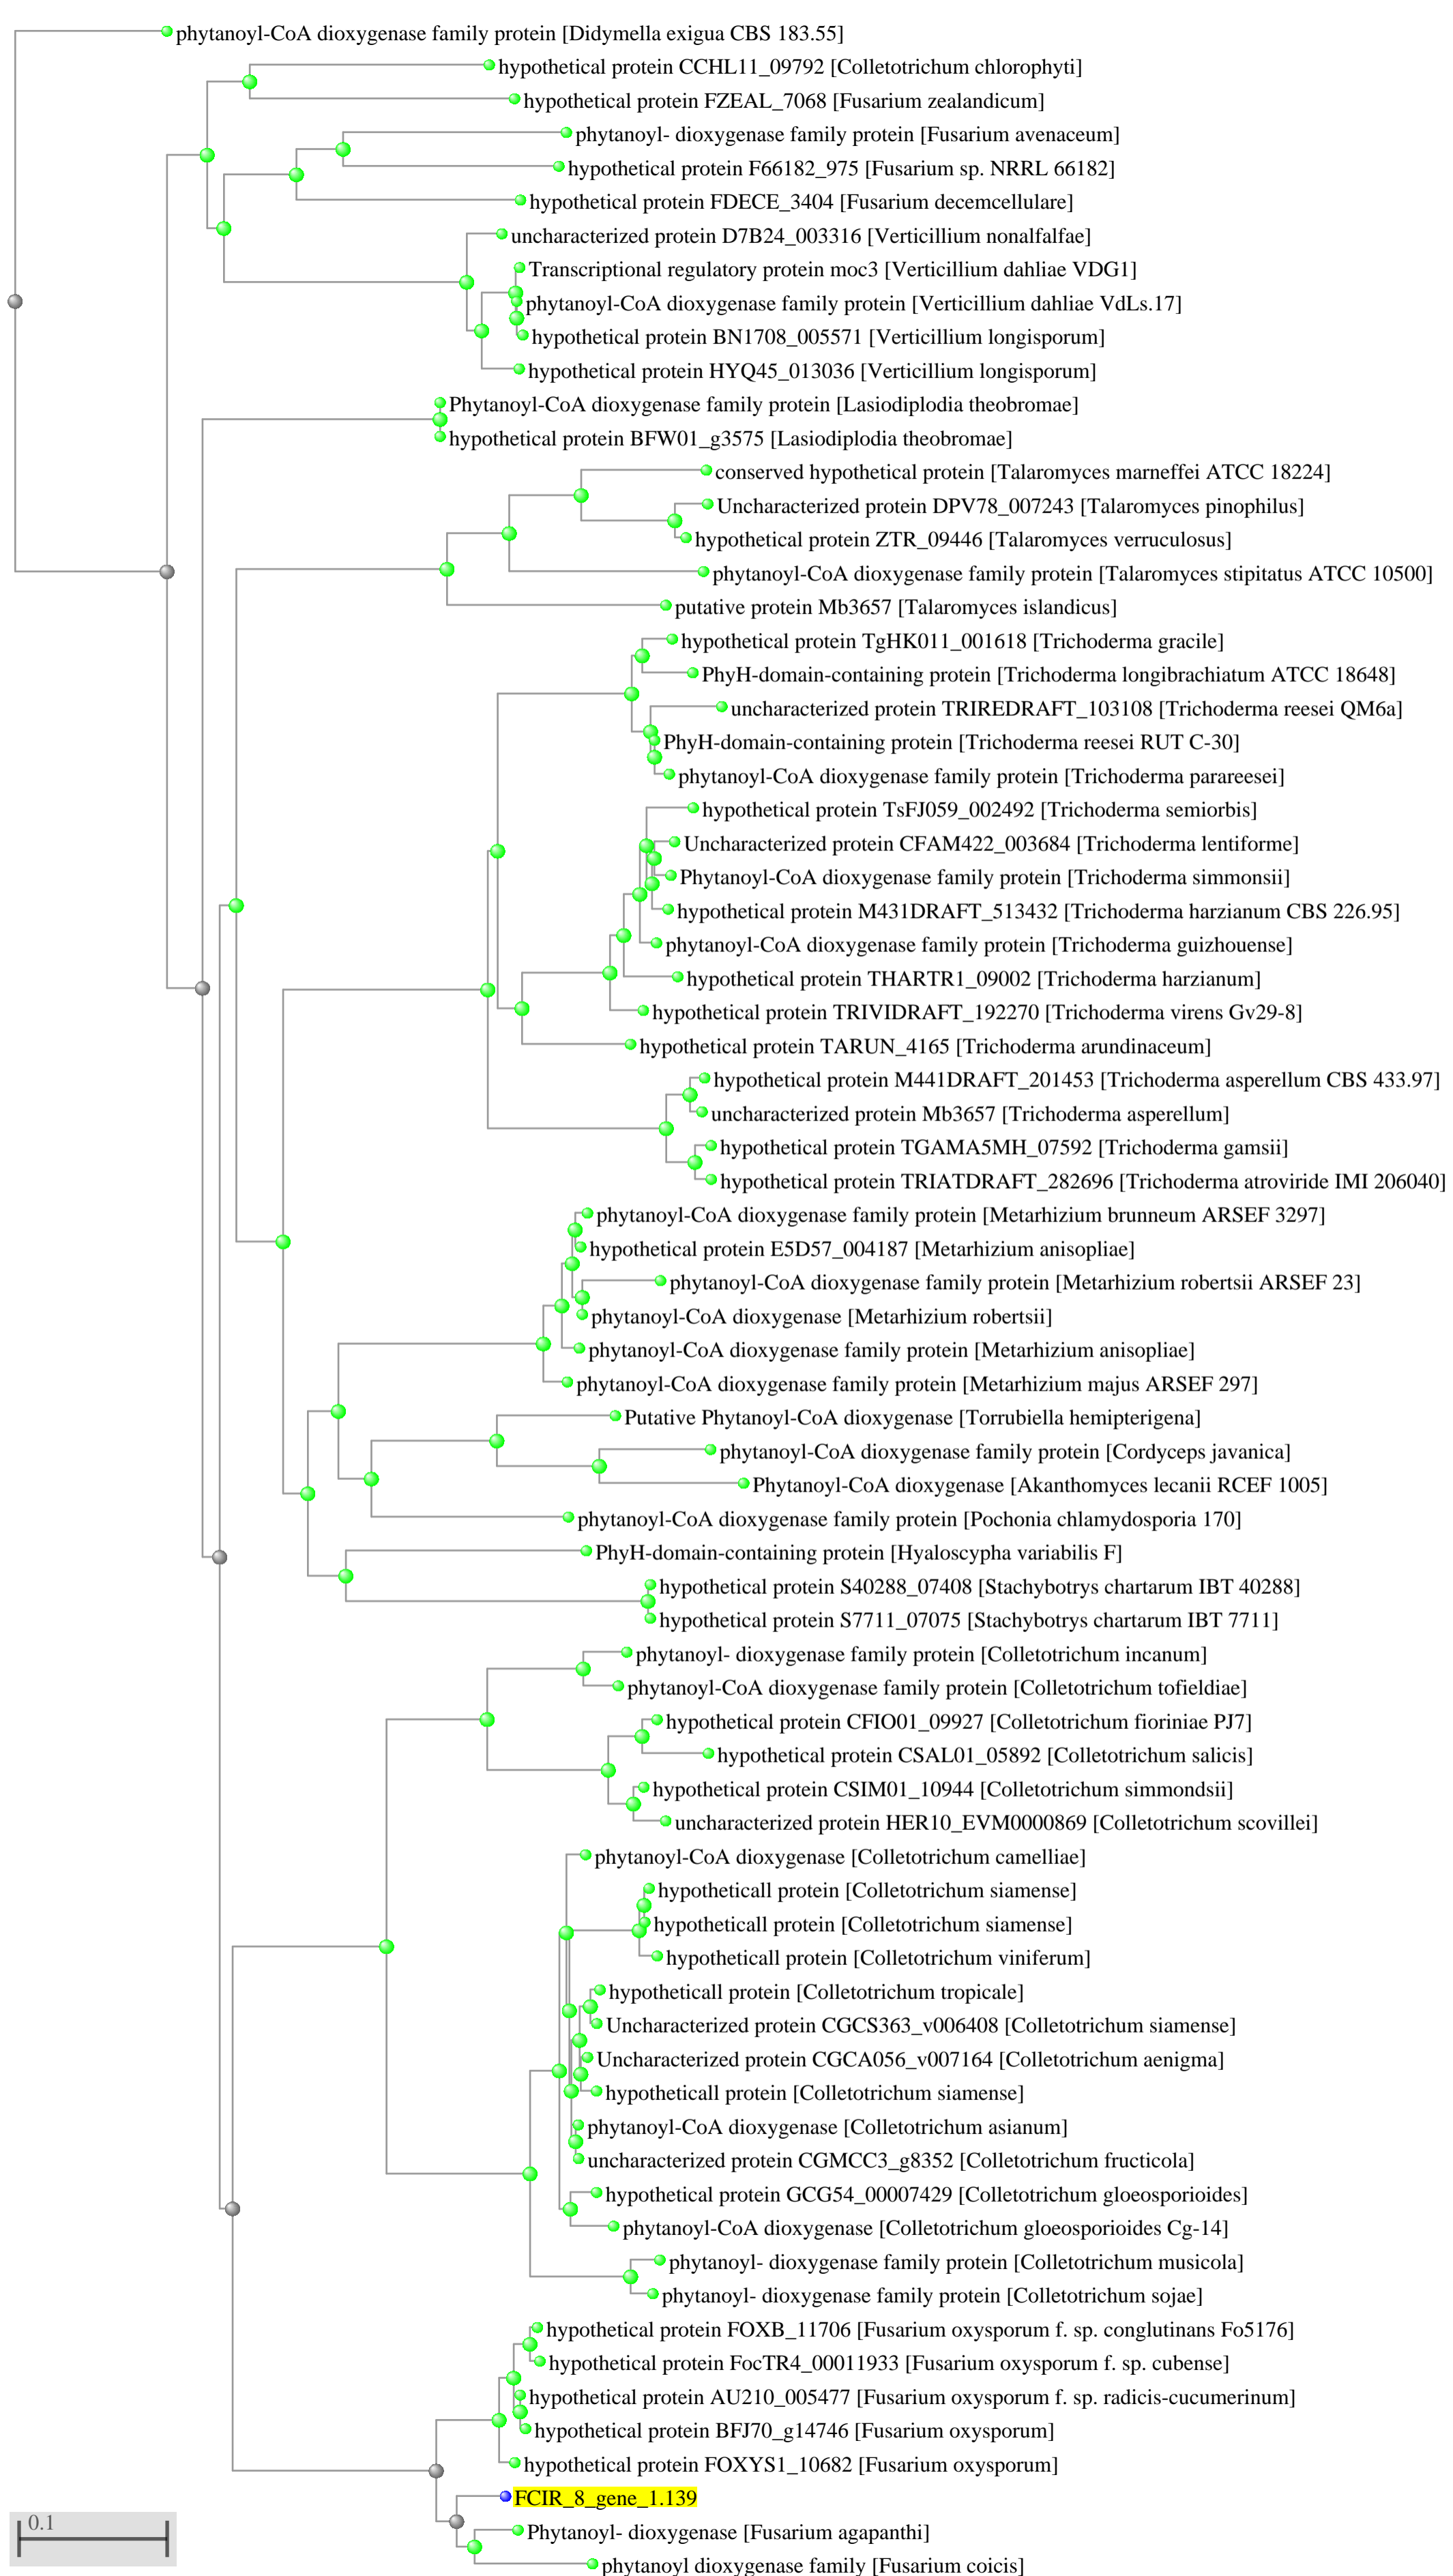

0.1

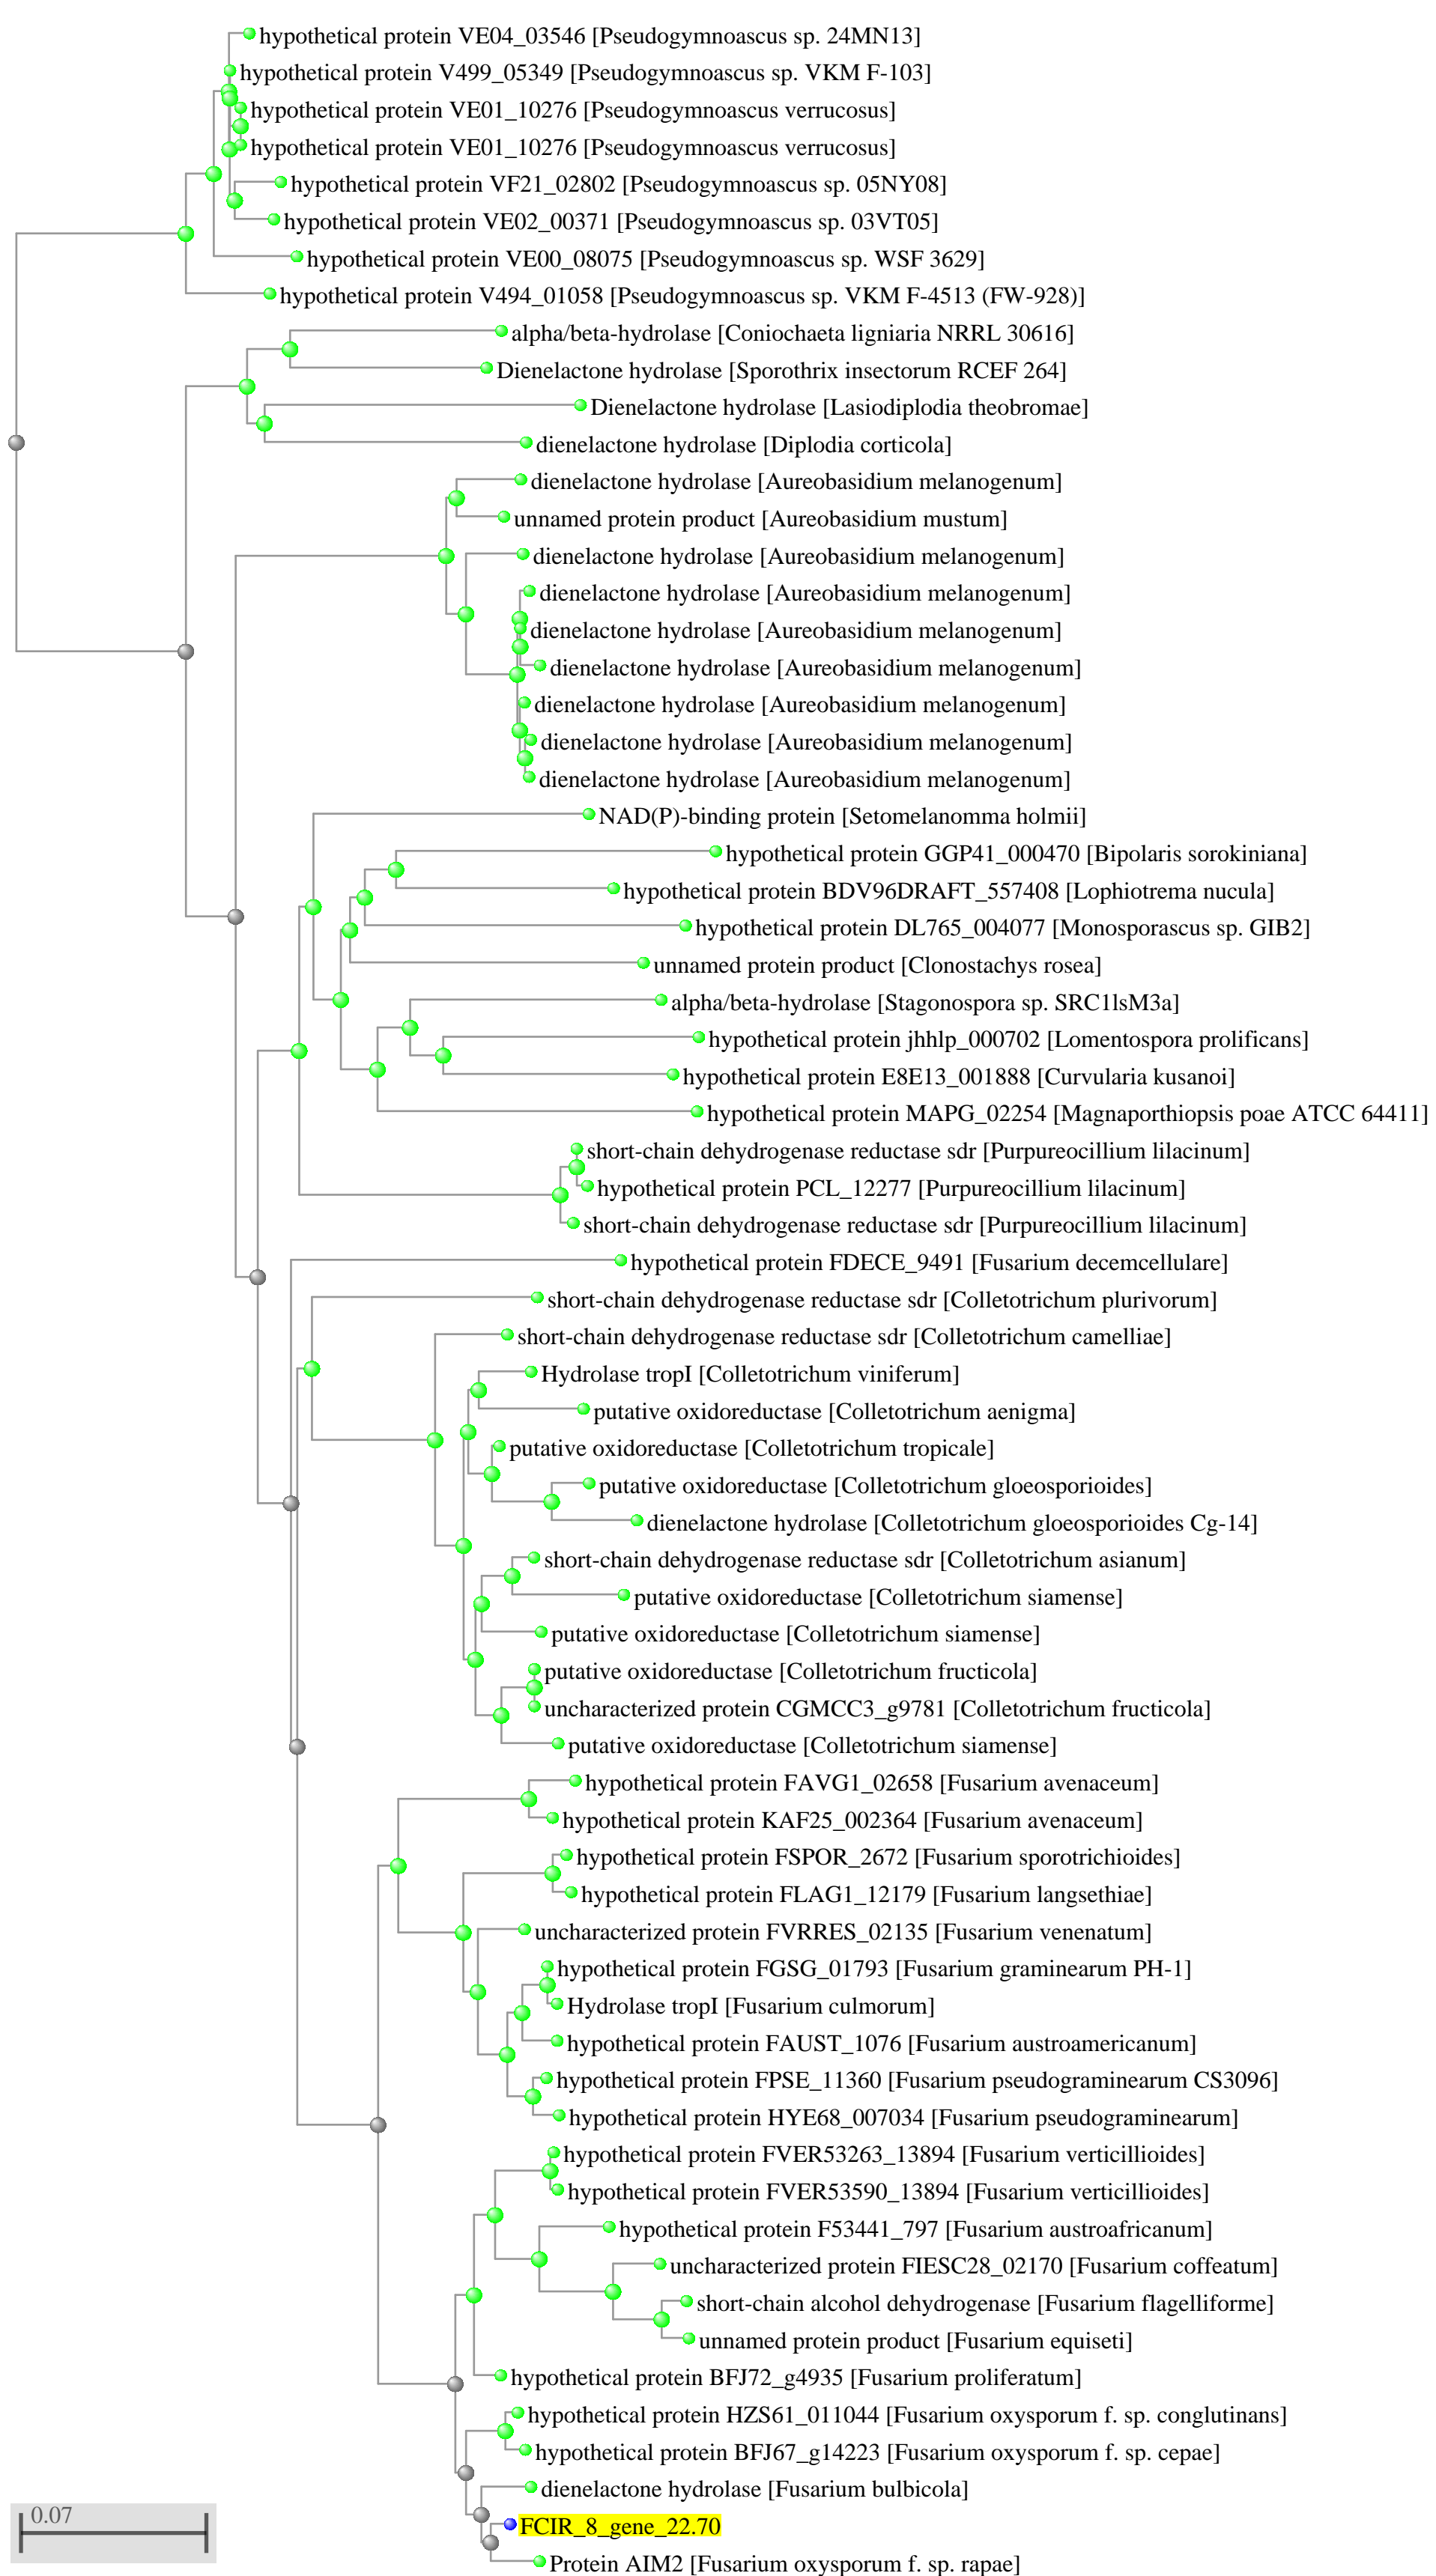

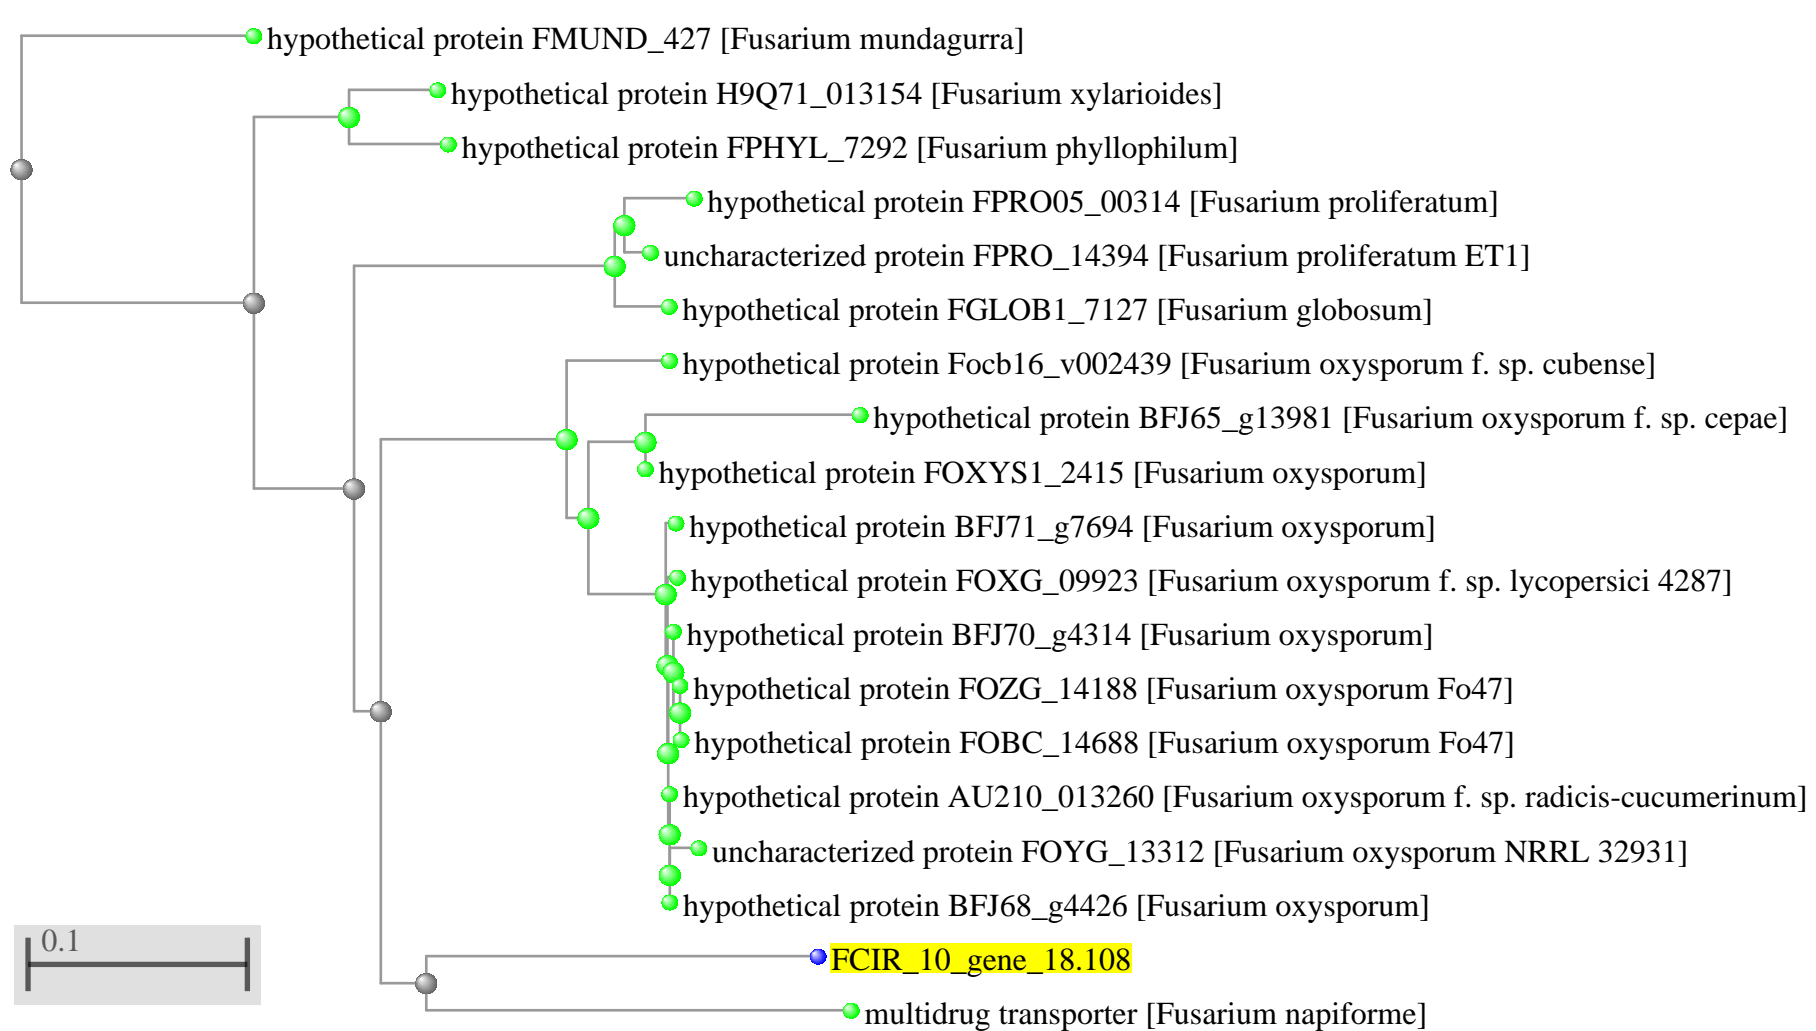



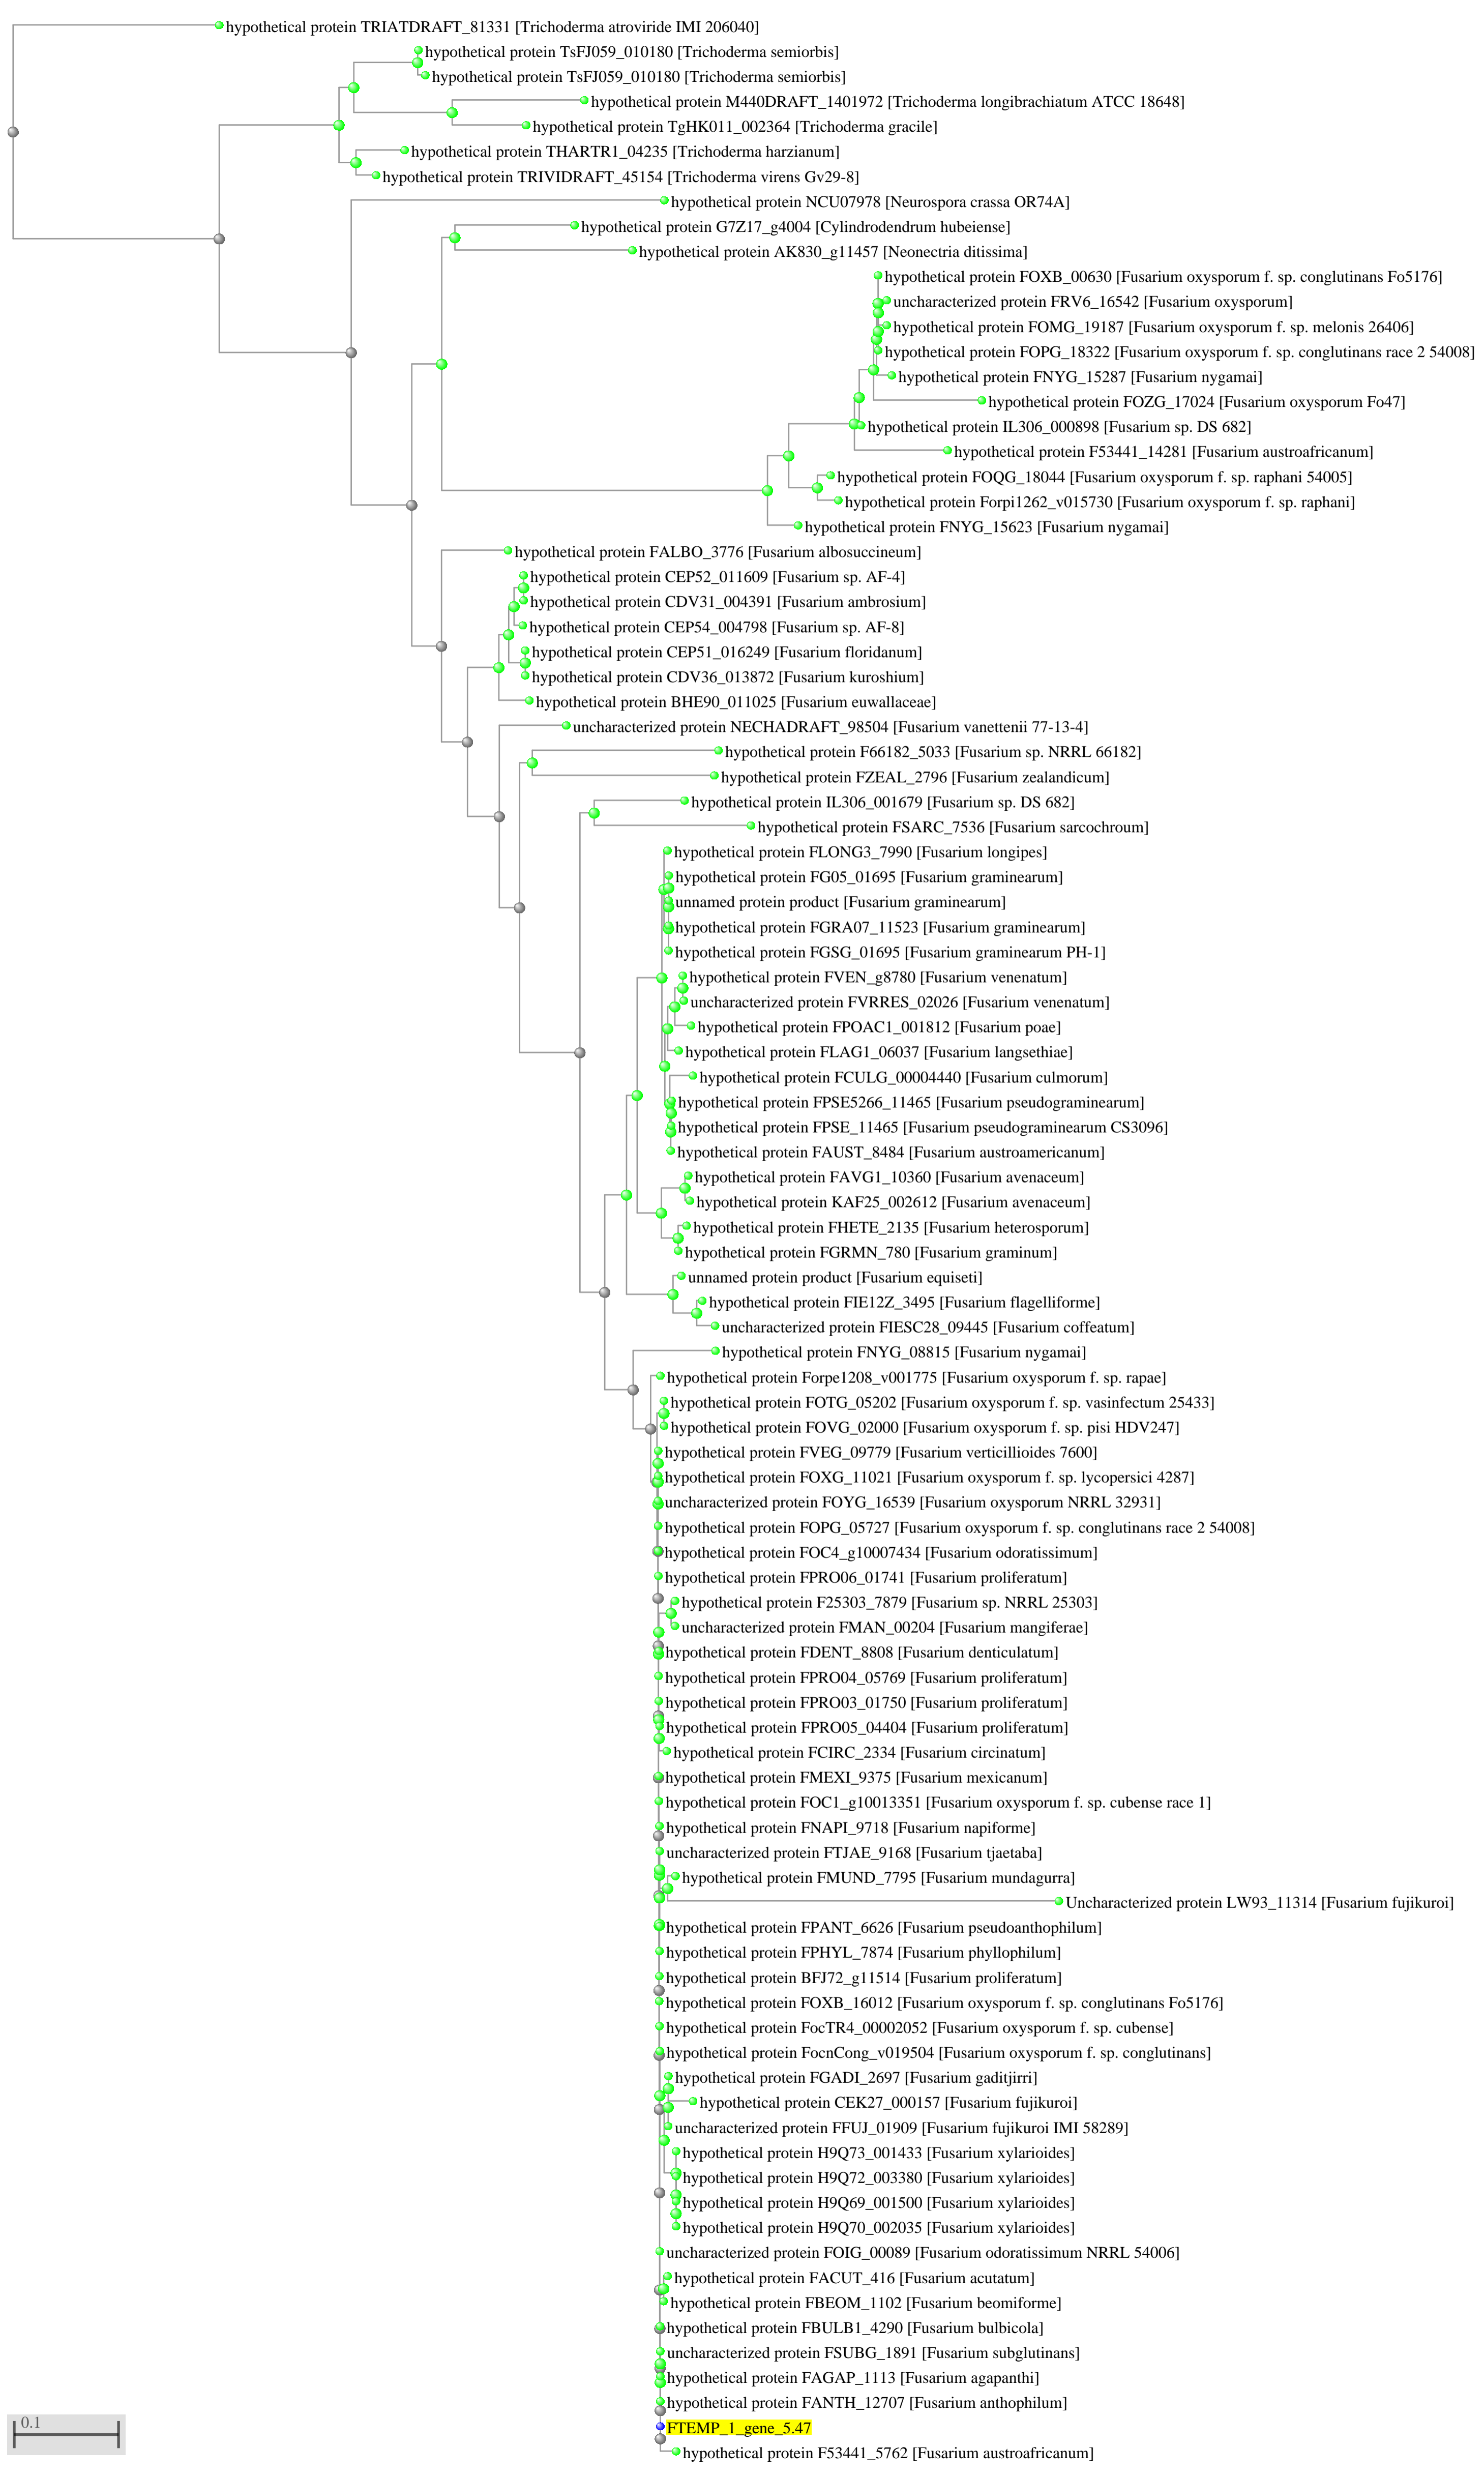



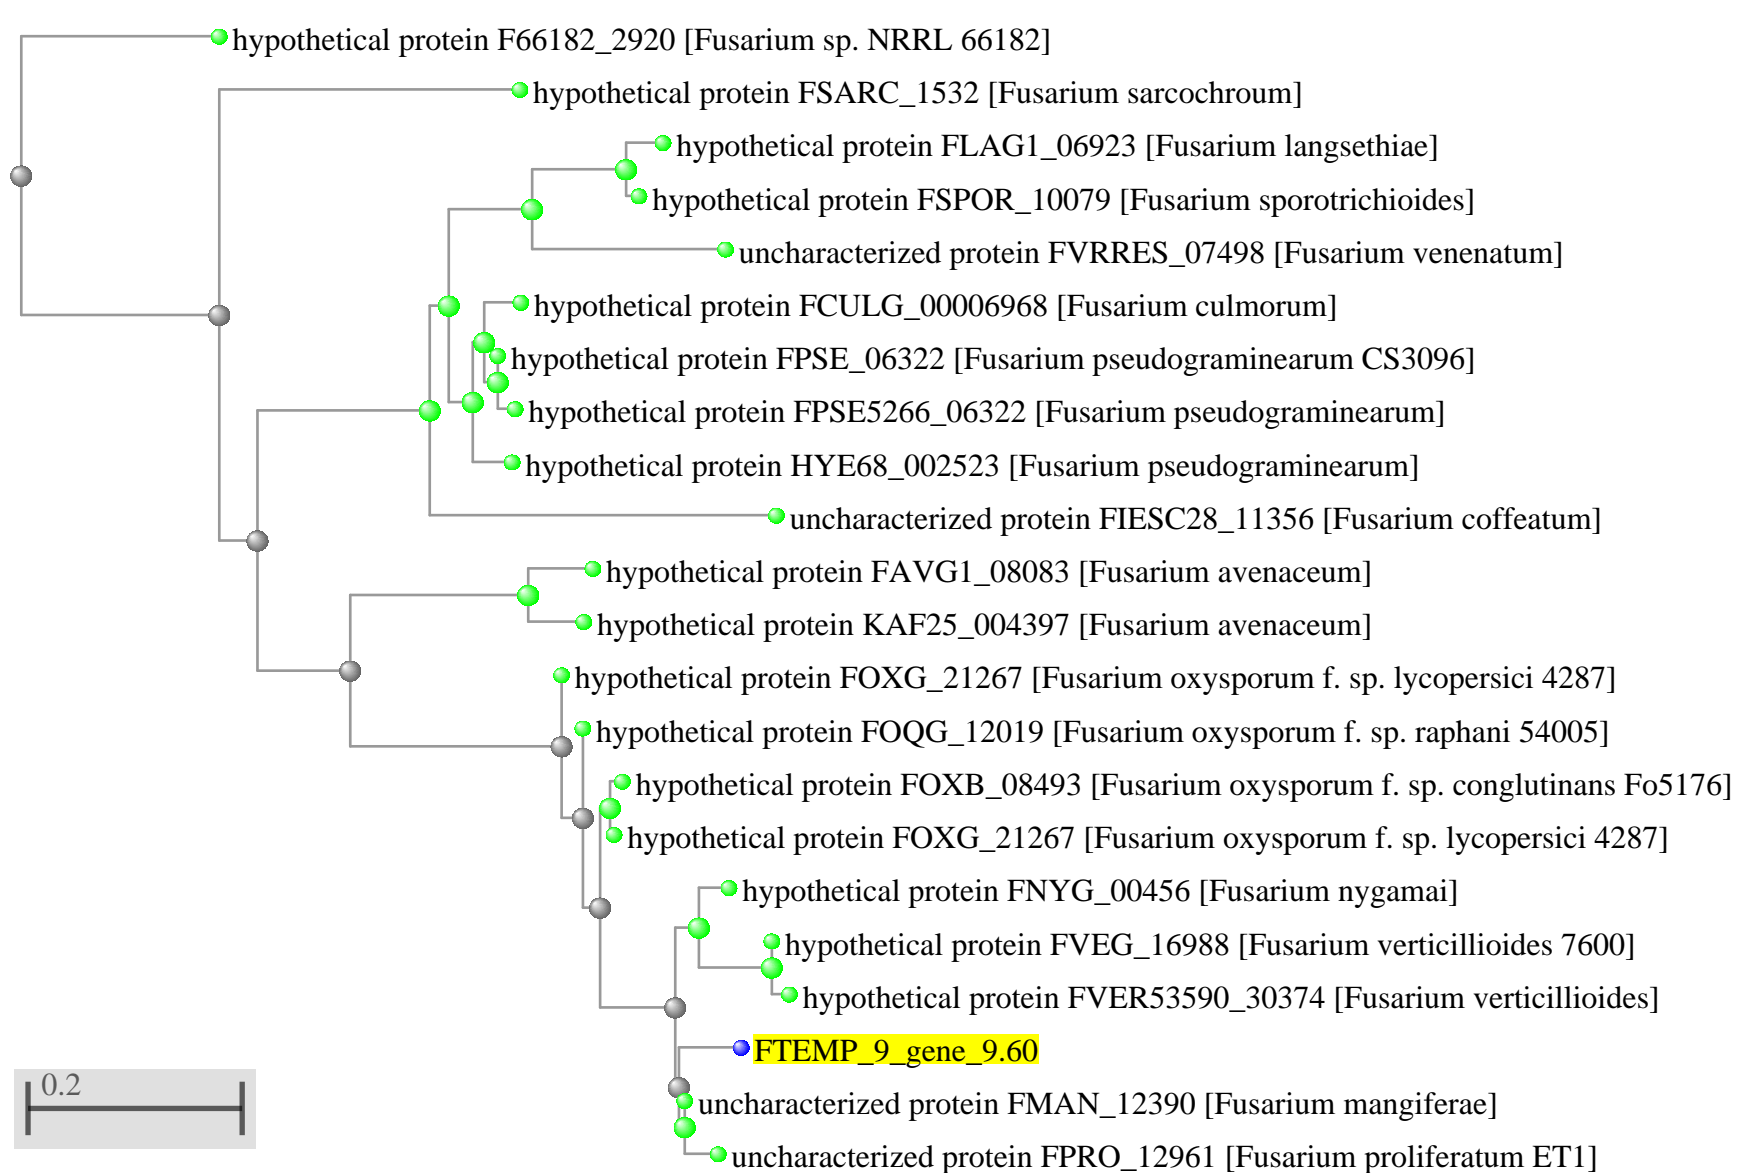

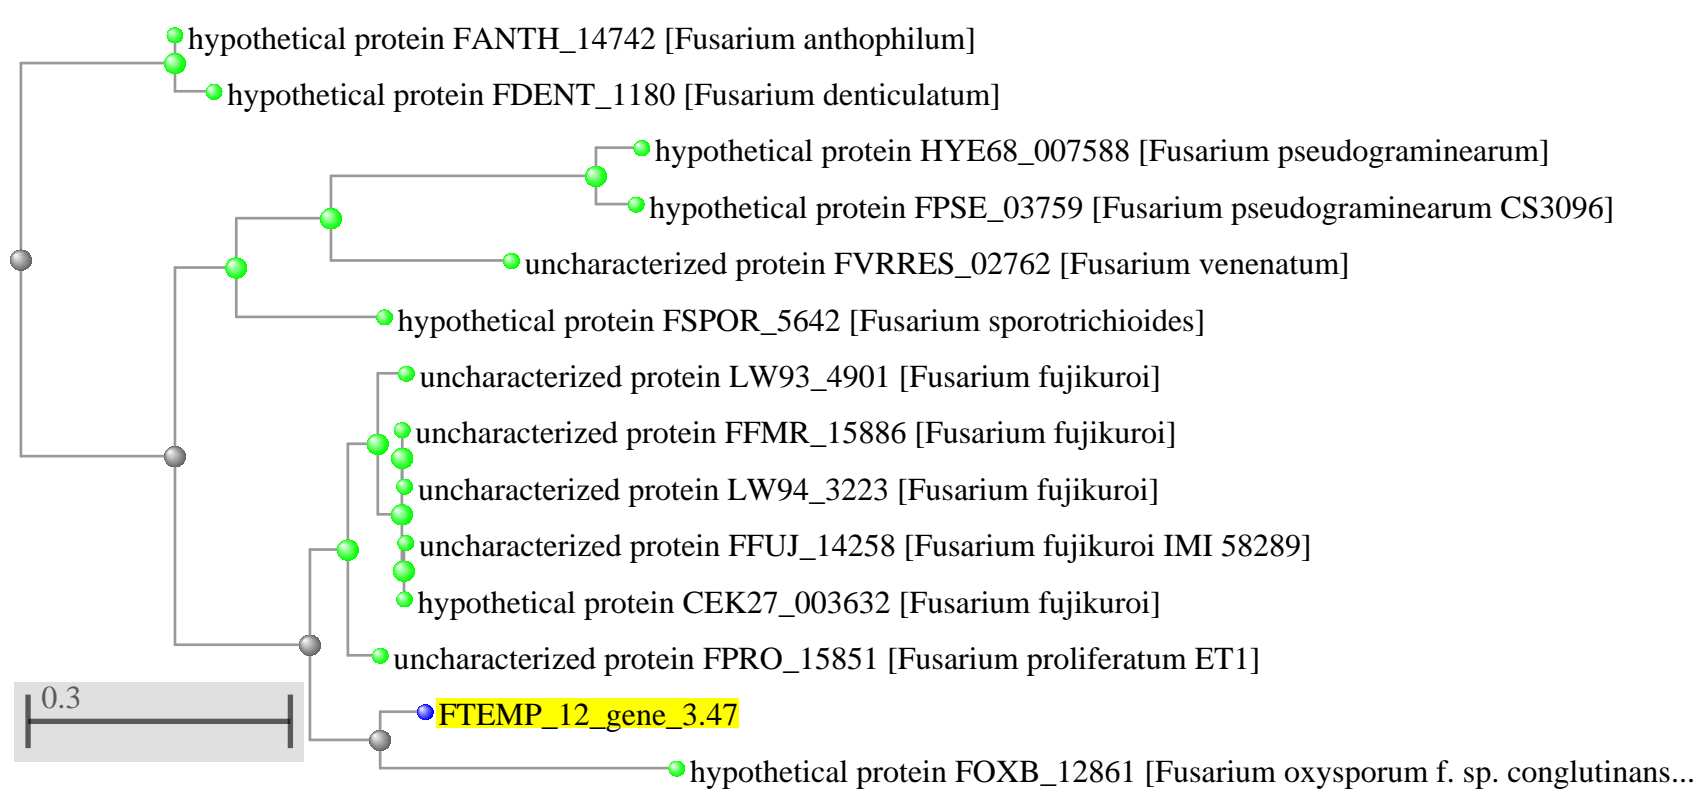

Supplement: Supplementary file 2 [file supplementary]
