# Supplementary material for: Characterization of Host-Specific Genes from Pine- and Grass-Associated Species of the <em>Fusarium Fujikuroi </em>Species Complex
Source: Preprints.org preprint supplement (doi:10.20944/preprints202207.0007.v1), 2022-07-01
Supplement: Supplementary file 2 [file Table S11.xlsx]

## Sheet: Table S11
Table S11. The host-range-associated gene density for both F. circinatum and F. temperatum.
F. circinatum	Genome size, bp	Total	Gene density/Mb			Chromosome number	F. circinatum gene density	F. temperatum gene density	Fold increase
Chromosome 1	6407589	9	1.40458			1	1.40458	0.919434	1.52766
Chromosome 2	5065897	4	0.789594			2	0.789594	n/a
Chromosome 3	5081688	8	1.57428			3	1.57428	0.20212	7.78885
Chromosome 4	4313068	5	1.15927			4	1.15927	1.10947	1.04488
Chromosome 5	4432453	5	1.12804			5	1.12804	1.32148	1.17148
Chromosome 6	4301695	10	2.32467			6	2.32467	0.237595	9.78416
Chromosome 7	3540654	6	1.6946			7	1.6946	0.859761	1.97102
Chromosome 8	3172515	11	3.46728			8	3.46728	1.88511	1.83929
Chromosome 9	2981544	5	1.67698			9	1.67698	0.678373	2.47207
Chromosome 10	2698620	6	2.22336			10	2.22336	2.66683	1.19946
Chromosome 11	2228220	1	0.448789			11	0.448789	n/a
Chromosome 12	525065	2	3.80905			12	3.80905	10.1396	2.66198
	Total	72				*Values highlighted in green represent more than two-fold differences between the unique gene density between the two different genomes
F. temperatum	Genome size, bp	Total	Gene density/Mb
Chromosome 1	6525753	6	0.919434
Chromosome 2	5052385	0	0
Chromosome 3	4947561	1	0.20212
Chromosome 4	4506647	5	1.10947
Chromosome 5	4540351	6	1.32148
Chromosome 6	4208847	1	0.237595
Chromosome 7	3489342	3	0.859761
Chromosome 8	3182830	6	1.88511
Chromosome 9	2948229	2	0.678373
Chromosome 10	2624843	7	2.66683
Chromosome 11	2247932	0	0
Chromosome 12	986231	10	10.1396
	Total	47
