# Supplementary material for: Characterization of Host-Specific Genes from Pine- and Grass-Associated Species of the <em>Fusarium Fujikuroi </em>Species Complex
Source: Preprints.org preprint supplement (doi:10.20944/preprints202207.0007.v1), 2022-07-01
Supplement: Supplementary file 3 [file Table S12.xlsx]

## Sheet: Table S12
Table S12. The SynChro data for genes downstream and upstream of the host-range-associated genes of both the pine- and Poaceae-host-associated Fusarium species; FCIR = Fusarium circinatum and FTEMP = Fusarium temperatum.
Pine-associated unique genes
			Five genes downstream of unique gene						Five genes upstream of unique gene
		Unique gene identifier	1	2	3	4	5	Unique gene	6	7	8	9	10		Total genes present (out of 11 genes)	Percentage, % (out of 11 genes)
1	FCIR	FCIR_1_gene_33.27	33.101	33.24	33.102	33.88	33.26		33.103	33.28	33.8	33.104	33.92
	FTEMP		33.94	33.78	33.27	33.79	33.80		33.96	N/A	N/A	33.97	33.15
	Present/absent		1	1	1	1	1		1	0	0	1	1		8	72.7273
2	FCIR	FCIR_1_gene_33.28	33.102	33.88	33.26	33.27	33.103		33.8	33.104	33.92	33.93	33.105			0
	FTEMP		33.27	33.79	33.80		33.96			33.97	33.15	33.16	33.30			0
	Present/absent		1	1	1	0	1		0	1	1	1	1		8	72.7273
3	FCIR	FCIR_1_40.27	40.13	40.68	40.61	40.69	40.70		40.62	40.63	40.71	40.29	40.30			0
	FTEMP			41.18	41.19	41.30	41.31		41.20	41.21	41.82	41.33	41.61			0
	Present/absent		0	1	1	1	1		1	1	1	1	1		9	81.8182
4	FCIR	FCIR_1_gene_57.14	57.68	57.49	57.69	57.50	57.70		57.8	57.52	57.72	57.53	57.128			0
	FTEMP		58.35	58.14	58.139	58.119					58.141		58.39			0
	Present/absent		1	1	1	1	0		0	0	1	0	1		6	54.5455
5	FCIR	FCIR_1_gene_57.52	57.69	57.50	57.70	57.14	57.8		57.72	57.53	57.128	57.74	57.54			0
	FTEMP		58.139	58.119					58.141		58.39	58.61	58.89			0
	Present/absent		1	1	0	0	0		1	0	1	1	1		6	54.5455
6	FCIR	FCIR_1_gene_57.70	57.48	57.68	57.49	57.69	57.50		57.14	57.8	57.52	57.72	57.53			0
	FTEMP			58.35	58.14	58.139	58.119					58.141				0
	Present/absent		0	1	1	1	1		0	0	0	1	0		5	45.4545
7	FCIR	FCIR_1_gene_57.8	57.49	57.69	57.50	57.70	57.14		57.52	57.72	57.53	57.128	57.74			0
	FTEMP		58.14	58.139	58.119					58.141		58.39	58.61			0
	Present/absent		1	1	1	0	0		0	1	0	1	1		6	54.5455
8	FCIR	FCIR_1_gene_8.74	8.1	8.56	8.3	8.4	8.59		8.6	8.92	8.96	8.8	8.63			0
	FTEMP		7.14	7.15	7.35	7.17	7.18		7.19	7.93	7.43	7.21				0
	Present/absent		1	1	1	1	1		1	1	1	1	0		9	81.8182
9	FCIR	FCIR_1_gene_9.43	9.54	9.85	9.40	9.41	9.42		9.16	9.72	9.28	9.29	9.30			0
	FTEMP		9.15						9.11	9.16	9.61	9.72	9.62			0
	Present/absent		1	0	0	0	0		1	1	1	1	1		6	54.5455
10	FCIR	FCIR_2_gene_19.96	19.93	19.51	19.81	19.94	19.95		19.5	19.83	20.36	20.80	20.38			0
	FTEMP		20.9		20.2	20.29	2.69		20.20	20.5	20.10	20.6	20.72			0
	Present/absent		1	0	1	1	1		1	1	1	1	1		9	81.8182
11	FCIR	FCIR_2_gene_22.10	22.8	22.9	22.45	22.17	22.18		22.40	23.76	23.21	23.1	23.23			0
	FTEMP		23.11	23.12	23.8		23.23		23.14	23.33	23.46	23.34	23.24			0
	Present/absent		1	1	1	0	1		1	1	1	1	1		9	81.8182
12	FCIR	FCIR_2_gene_38.93	38.62	38.79	38.63	38.43	38.30		38.44	39.75	39.71	39.76	39.12			0
	FTEMP				39.2	39.14	39.3		39.46	39.68		39.19	39.4			0
	Present/absent		0	0	1	1	1		1	1	0	1	1		7	63.6364
13	FCIR	FCIR_2_gene_7.23	7.36	7.85	7.37	7.104	7.4		7.24	7.106	7.25	7.107	7.26			0
	FTEMP		7.89	7.81	7.46	7.91	7.47			7.26	7.14	7.95	7.83			0
	Present/absent		1	1	1	1	1		0	1	1	1	1		9	81.8182
14	FCIR	FCIR_3_gene_0.73	edge	edge	edge	edge	edge		0.89	0.74	0.90	0.75	0.35			0
	FTEMP		check dat FT tel0mere aan die kant het						0.15	0.1	0.58	0.33	0.17			0
	Present/absent								1	1	1	1	1		5	45.4545
15	FCIR	FCIR_3_gene_2.101	2.97	2.45	2.27	2.46	2.63		3.56	3.57	3.58	3.18	3.92			0
	FTEMP				2.87	2.54				2.89	2.32	2.33	2.78			0
	Present/absent		0	0	1	1	0		0	1	1	1	1		6	54.5455
16	FCIR	FCIR_3_gene_37.64	37.37	37.73	37.40	37.62	37.63		37.86	37.65	37.41	37.12	37.42			0
	FTEMP		36.38	36.94		36.58	36.28						36.40			0
	Present/absent		1	1	0	1	1		0	0	0	0	1		5	45.4545
17	FCIR	FCIR_3_gene_49.72	48.38	48.54	48.39	48.93	48.22		49.75	49.76	49.198	49.77	49.5			0
	FTEMP			47.111	47.33					47.49	47.62	48.136	48.12			0
	Present/absent		0	1	1	0	0		0	1	1	1	1		6	54.5455
18	FCIR	FCIR_3_gene_4.30	4.14	4.110	4.16	4.28	4.29		4.120	4.17	4.76	4.32	4.18			0
	FTEMP		3.38	3.16	3.106	3.56	3.57				3.126	3.17	3.9			0
	Present/absent		1	1	1	1	1		0	0	1	1	1		8	72.7273
19	FCIR	FCIR_3_gene_5.72	4.35	4.126	4.19	4.61	4.37		5.73	5.26	5.75	5.112	5.51			0
	FTEMP				4.57	4.58					4.4	4.42	4.82			0
	Present/absent		0	0	1	1	0		0	0	1	1	1		5	45.4545
20	FCIR	FCIR_3_gene_6.47	6.4	6.10	6.64	6.65	6.66		6.12	6.100	6.101	6.13	6.28			0
	FTEMP		5.76	5.77	5.54				5.78	5.13	5.98	5.1	5.58			0
	Present/absent		1	1	1	0	0		1	1	1	1	1		8	72.7273
21	FCIR	FCIR_3_gene_6.65	6.8	6.63	6.4	6.10	6.64		6.66	6.47	6.12	6.100	6.101			0
	FTEMP		5.38	5.53	5.76	5.77	5.54				5.78	5.13	5.98			0
	Present/absent		1	1	1	1	1		0	0	1	1	1		8	72.7273
22	FCIR	FCIR_4_gene_3.17	3.13	3.14	3.104	3.109	3.16		3.78	3.32	3.80	3.18	3.19			0
	FTEMP			3.99							3.107	3.91	3.13			0
	Present/absent		0	1	0	0	0		0	0	1	1	1		4	36.3636
23	FCIR	FCIR_4_gene_3.38	2.48	2.29	2.68	2.30	2.31		3.3	3.1	3.4	3.86	3.23			0
	FTEMP			3.82			3.84		3.71	3.0	3.72	3.39	3.73			0
	Present/absent		0	1	0	0	1		1	1	1	1	1		7	63.6364
24	FCIR	FCIR_4_gene_39.86	39.0	39.5	39.28	39.6	39.85		39.7	39.8	39.30	39.42	39.100			0
	FTEMP			39.68	39.66	39.86			39.87	39.88	39.69	39.57	39.15			0
	Present/absent		0	1	1	1	0		1	1	1	1	1		8	72.7273
25	FCIR	FCIR_4_gene_40.48	40.32	40.80	40.33	40.46	40.47		40.84	40.85	40.52	40.53	40.88			0
	FTEMP			40.109	40.91						40.35	40.36	40.37			0
	Present/absent		0	1	1	0	0		0	0	1	1	1		5	45.4545
26	FCIR	FCIR_4_gene_42.78	42.60	42.11	42.137	42.102	42.158		42.161	42.12	edge	edge	edge			0
	FTEMP		43.111						43.56	edge	edge	edge	edge			0
	Present/absent		1	0	0	0	0		1	check FT and FC f0r tel0meres here					2	18.1818
27	FCIR	FCIR_5_gene_0.123	0.6	0.60	0.42	0.109	0.110	part 0f	0.124	0.111	0.125	0.126	0.127			0
	FTEMP			2.73	2.18	2.45	2.44	inversi0n		2.100	2.0	1.87	1.86			0
	Present/absent		0	1	1	1	1		0	1	1	1	1		8	72.7273
28	FCIR	FCIR_5_gene_14.66	14.64	14.27	14.78	14.1	14.65		14.30	14.31	14.32	14.8	14.18			0
	FTEMP			14.95	15.61				15.64	15.78	15.35	15.57	15.65			0
	Present/absent		0	1	1	0	0		1	1	1	1	1		7	63.6364
29	FCIR	FCIR_5_gene_31.37	31.14	31.82	31.35	31.36	31.83		31.18	31.104	31.85	31.86	31.0			0
	FTEMP			32.17	32.102	32.103	32.18			32.104	32.85	32.86	32.2			0
	Present/absent		0	1	1	1	1		0	1	1	1	1		8	72.7273
30	FCIR	FCIR_5_gene_43.57	43.18	43.19	43.70	43.71	43.23		43.24	43.7	43.25	43.75	43.8			0
	FTEMP					44.170	44.22		44.66	44.66	44.24		44.47			0
	Present/absent		0	0	0	1	1		1	1	1	0	1		6	54.5455
31	FCIR	FCIR_5_gene_43.75	43.23	43.57	43.24	43.7	43.25		43.8	43.9	43.76	43.60	43.28			0
	FTEMP		44.22		44.66	44.66	44.24		44.47		44.67	44.119	44.68			0
	Present/absent		1	0	1	1	1		1	0	1	1	1		8	72.7273
32	FCIR	FCIR_6_gene_1.117	1.29	1.30	1.31	1.13	1.32		1.15	1.33	1.34	1.35	1.135			0
	FTEMP		1.82	1.59	1.27	1.10			1.68	1.83	1.35	1.138				0
	Present/absent		1	1	1	1	0		1	1	1	1	0		8	72.7273
33	FCIR	FCIR_6_gene_1.32	1.12	1.29	1.29	1.30	1.31		1.117	1.15	1.33	1.34	1.35			0
	FTEMP		1.111	1.82	1.82	1.59	1.27			1.68	1.83	1.35	1.138			0
	Present/absent		1	1	1	1	1		0	1	1	1	1		9	81.8182
34	FCIR	FCIR_6_gene_2.131	2.1	2.2	2.142	2.140	2.26		2.6	2.27	2.28	2.103	2.104			0
	FTEMP		2.142						2.131	2.144	2.145	2.28				0
	Present/absent		1	0	0	0	0		1	1	1	1	0		5	45.4545
35	FCIR	FCIR_6_gene_2.142	1.87	1.41	2.45	2.1	2.2		2.140	2.26	2.131	2.6	2.27			0
	FTEMP				2.78	2.142						2.131	2.144			0
	Present/absent		0	0	1	1	0		0	0	0	1	1		4	36.3636
36	FCIR	FCIR_6_gene_2.2	1.66	1.87	1.41	2.45	2.1		2.142	2.140	2.26	2.131	2.6			0
	FTEMP		2.2			2.78	2.142						2.131			0
	Present/absent		1	0	0	1	1		0	0	0	0	1		4	36.3636
37	FCIR	FCIR_6_gene_2.26	2.45	2.1	2.2	2.142	2.140		2.131	2.6	2.27	2.28	2.103			0
	FTEMP		2.78	2.142						2.131	2.144	2.145	2.28			0
	Present/absent		1	1	0	0	0		0	1	1	1	1		6	54.5455
38	FCIR	FCIR_6_gene_2.35	2.10	2.109	2.110	2.85	2.12		2.120	2.36	2.37	2.121	2.114			0
	FTEMP		2.49			2.10	2.132		2.85	2.148	2.105	2.133	2.106			0
	Present/absent		1	0	0	1	1		1	1	1	1	1		8	72.7273
39	FCIR	FCIR_6_gene_36.35	36.61	36.22	36.57	36.19	36.23		36.54	36.9	36.65	36.10	36.26			0
	FTEMP					40.98	40.76			40.55			36.1			0
	Present/absent		0	0	0	1	1		0	1	0	0	1		4	36.3636
40	FCIR	FCIR_6_gene_40.25	40.14	40.15	40.56	40.16	40.57		40.26	40.59	40.28	40.29	40.17			0
	FTEMP		40.61	41.74		41.94				41.116	41.27	41.26	41.90			0
	Present/absent		1	1	0	1	0		0	1	1	1	1		7	63.6364
41	FCIR	FCIR_6_gene_40.57	40.13	40.14	40.15	40.56	40.16		40.25	40.26	40.59	40.28	40.29			0
	FTEMP		40.39	40.61	41.74		41.94				41.116	41.27	41.26			0
	Present/absent		1	1	1	0	1		0	0	1	1	1		7	63.6364
42	FCIR	FCIR_7_gene_1.36	1.14	1.110	1.109	1.79	1.111		1.81	1.37	1.19	1.38	1.20			0
	FTEMP		1.64	1.47	1.48				1.69	1.52	1.70	1.33	1.20			0
	Present/absent		1	1	1	0	0		1	1	1	1	1		8	72.7273
43	FCIR	FCIR_7_gene_3.47	3.5	3.57	3.46	3.3	3.12		3.37	3.48	3.49	3.38	3.26			0
	FTEMP			3.7			3.27						4.46			0
	Present/absent		0	1	0	0	1		0	0	0	0	1		3	27.2727
44	FCIR	FCIR_7_gene_3.5	3.17	3.18	3.44	3.31	3.32		3.57	3.46	3.3	3.12	3.47			0
	FTEMP		3.12	3.45					3.7			3.27				0
	Present/absent		1	1	0	0	0		1	0	0	1	0		4	36.3636
45	FCIR	FCIR_7_gene_3.54	3.40	3.51	3.52	3.53	3.41		4.128	4.2	4.3	4.4	4.23			0
	FTEMP						4.447				4.29	4.40				0
	Present/absent		0	0	0	0	1		0	0	1	1	0		3	27.2727
46	FCIR	FCIR_7_gene_27.82	27.10	27.22	27.86	27.41	27.24		27.12	27.58	27.13	27.14	27.15			0
	FTEMP		27.19	28.27	28.28		28.14		28.38	28.16	28.3	28.4	28.5			0
	Present/absent		1	1	1	0	1		1	1	1	1	1		9	81.8182
47	FCIR	FCIR_7_gene_30.111	30.51	30.52	30.110	30.53	30.54		30.69	30.55	30.70	30.71	30.56			0
	FTEMP		31.125	31.52	31.69							31.72	0			0
	Present/absent		1	1	1	0	0		0	0	0	1			4	36.3636
48	FCIR	FCIR_8_gene_1.117	1.114	1.138	1.5	1.116	1.139		1.140	1.99	1.118	1.15	1.119			0
	FTEMP		0.80	0.12						1.31	1.3		1.70			0
	Present/absent		1	1	0	0	0		0	1	1	0	1		5	45.4545
49	FCIR	FCIR_8_gene_1.139	1.69	1.114	1.138	1.5	1.116		1.117	1.140	1.99	1.118	1.15			0
	FTEMP			0.80	0.12						1.31	1.3				0
	Present/absent		0	1	1	0	0		0	0	1	1	0		4	36.3636
50	FCIR	FCIR_8_gene_22.70	22.66	22.67	22.68	22.69	22.81		22.71	22.82	22.32	22.83	22.84			0
	FTEMP		21.12	21.97												0
	Present/absent		1	1	0	0	0		0	0	0	0	0		2	18.1818
51	FCIR	FCIR_8_gene_22.71	22.67	22.68	22.69	22.81	22.70		22.82	22.32	22.83	22.84	22.45			0
	FTEMP		21.97										21.111			0
	Present/absent		1	0	0	0	0		0	0	0	0	1		2	18.1818
52	FCIR	FCIR_8_gene_22.81	22.65	22.66	22.67	22.68	22.69		22.70	22.71	22.82	22.32	22.83			0
	FTEMP		21.95	21.12	21.97											0
	Present/absent				1	0	0		0	0	0	0	0		1	9.09091
53	FCIR	FCIR_8_gene_22.82	22.68	22.69	22.81	22.70	22.71		22.32	22.83	22.84	22.45	22.46			0
	FTEMP											21.111				0
	Present/absent		0	0	0	0	0		0	0	0	1	0		1	9.09091
54	FCIR	FCIR_8_gene_22.83	22.81	22.70	22.71	22.82	22.32		22.84	22.45	22.46	22.47	22.48			0
	FTEMP									21.111						0
	Present/absent		0	0	0	0	0		0	1	0	0	0		1	9.09091
55	FCIR	FCIR_8_gene_23.0	22.57	22.98	22.108	22.40	23.2		23.48	23.89	23.3	23.4	23.93			0
	FTEMP		22.71		22.57	22.6	22.22			22.36	22.23	22.59	22.98			0
	Present/absent		1	0	1	1	1		0	1	1	1	1		8	72.7273
56	FCIR	FCIR_8_gene_25.95	25.92	25.52	25.117	25.8	25.32		25.33	25.3	25.4	25.54	25.100			0
	FTEMP					25.32	25.39		25.16	25.41		26.20				0
	Present/absent		0	0	0	1	1		1	1	0	1	0		5	45.4545
57	FCIR	FCIR_8_gene_4.78	4.0	4.76	4.22	4.92	4.57		4.25	4.58	4.15	4.44	4.10			0
	FTEMP				3.80	3.49	3.5		3.31	3.32	3.118		3.111			0
	Present/absent		0	0	1	1	1		1	1	1	0	1		7	63.6364
58	FCIR	FCIR_8_gene_5.67	5.65	5.44	5.45	5.46	5.66		5.68	5.47	5.147	5.48	5.121			0
	FTEMP			4.36	4.37				4.45		4.123	4.107				0
	Present/absent		0	1	1	0	0		1	0	1	1	0		5	45.4545
59	FCIR	FCIR_9_gene_21.36	21.47	21.64	21.65	21.92	22.4		22.128	22.0	22.1	22.92	22.51			0
	FTEMP		21.50	21.83	21.57	21.10				22.58	22.2	22.52				0
	Present/absent		1	1	1	1	0		0	1	1	1	0		7	63.6364
60	FCIR	FCIR_9_gene_4.51	4.91	4.73	4.62	4.74	4.6		4.7	4.76	4.77	4.8	4.65			0
	FTEMP				4.31				4.55	4.17	4.57		4.5			0
	Present/absent		0	0	1	0	0		1	1	1	0	1		5	45.4545
61	FCIR	FCIR_9_gene_4.6	4.59	4.91	4.73	4.62	4.74		4.51	4.7	4.76	4.77	4.8			0
	FTEMP					4.3				4.55	4.17	4.57				0
	Present/absent		0	0	0	1	0		0	1	1	1	0		4	36.3636
62	FCIR	FCIR_9_gene_7.100	7.0	7.33	7.34	7.1	7.51		7.15	7.36	7.16	7.54	7.55			0
	FTEMP				7.69 / 7.77	7.82 / 6.32			7.16 / 6.99		7.74 / 6.12	7.73 / 6.98	7.72 / 6.97	Duplicated in FT		0
	Present/absent		0	0	1	1	0		1	0	1	1			5	45.4545
63	FCIR	FCIR_9_gene_9.105	9.79	9.80	9.121	9.99	9.81		9.82	10.55	10.20	10.58	10.22			0
	FTEMP		9.82	9.36	9.63	9.102	9.61		9.37	9.20	9.64	9.55	9.106			0
	Present/absent		1	1	1	1	1		1	1	1	1	1	0nly the unique gene is different	10	90.9091
64	FCIR	FCIR_10_gene_18.108	18.32	18.33	18.34	18.12	18.93		18.17	18.110	18.94	18.8	18.95			0
	FTEMP		18.40	18.4	18.83				18.103		18.8	18.126	18.9			0
	Present/absent		1	1	1	0	0		1	0	1	1	1		7	63.6364
65	FCIR	FCIR_10_gene_18.3	18.16	18.82	18.28	18.29	18.102		18.103	18.11	18.47	18.48	18.32			0
	FTEMP					17.110					18.80	18.68	18.40			0
	Present/absent		0	0	0	1	0		0	0	1	1	1		4	36.3636
66	FCIR	FCIR_10_gene_25.32	25.58	25.59	25.30	25.60	25.61		25.33	25.139	25.140	25.174	25.188			0
	FTEMP				25.112				25.34			25.97	25.38			0
	Present/absent		0	0	1	0	0		1	0	0	1	1		4	36.3636
67	FCIR	FCIR_10_gene_25.58	25.82	25.167	25.29	25.217	25.198		25.59	25.30	25.60	25.61	25.32			0
	FTEMP		25.110		25.3					25.112						0
	Present/absent		1	0	1	0	0		0	1	0	0	0		3	27.2727
68	FCIR	FCIR_10_gene_25.61	25.198	25.58	25.59	25.30	25.60		25.32	25.33	25.139	25.140	25.174			0
	FTEMP					25.112				25.34			25.97			0
	Present/absent		0	0	0	1	0		0	1	0	0	1		3	27.2727
69	FCIR	FCIR_10_gene_5.90	5.60	5.36	5.115	5.37	5.89		5.91	5.116	5.139	5.140	5.117			0
	FTEMP		4.86	4.66	4.87	4.32	4.52			4.15	4.67					0
	Present/absent		1	1	1	1	1		0	1	1	0	0		7	63.6364
70	FCIR	FCIR_11_gene_18.47	18.64	18.65	18.81	18.98	18.10		18.84	18.99	18.85	18.86	18.100			0
	FTEMP					18.87			18.69	18.31	18.17	19.53	19.85			0
	Present/absent		0	0	0	1	0		1	1	1	1	1		6	54.5455
71	FCIR	FCIR_12_gene_1.3	1.32	1.18	1.19	1.2	1.20		1.4	1.5	1.6	1.33	1.49			0
	FTEMP															0
	Present/absent		0	0	0	0	0		0	0	0	0	0		0	0
72	FCIR	FCIR_12_1.33	1.2	1.3	1.4	1.5	1.6		1.49	1.9	1.51	1.77	1.22			0
	FTEMP										3.1	3.8	3.69			0
	Present/absent	H	0	0	0	0	0		0	0	1	1	1		3	27.2727
Poaceae-associated unique genes
			Five genes downstream of unique gene						Five genes upstream of unique gene
		Unique gene identifier	1	2	3	4	5	Unique gene	6	7	8	9	10		Total genes present (out of 11 genes)	Percentage, % (out of 11 genes)
1	FTEMP	FTEMP_1_gene_20.82	20.30	20.65	20.67	20.81	20.68		20.83	20.5	20.84	20.17	20.70
	FCIR		19.3	19.5	19.18	19.74	19.64		19.76	19.65	19.29	19.30
	Present/absent		1	1	1	1	1		1	1	1	1	0		9	81.8182
2	FTEMP	FTEMP_1_gene_3.65	3.20	3.83	3.55	3.22	3.99		3.100	3.66	3.25	3.101	3.26			0
	FCIR		3.53	2.42	2.18 / 2.96	2.41 / 2.117			3.98 / 3.43	3.83 / 3.14		3.67				0
	Present/absent		1	1	1	1	0		1	1	0	1	0		7	63.6364
3	FTEMP	FTEMP_1_gene_37.52	37.4	37.63	37.94	37.95	37.96		37.75	37.36	38.20	38.21	38.53			0
	FCIR		37.12	37.95	37.15	37.69	37.70			37.18	37.5	37.72	37.96			0
	Present/absent		1	1	1	1	1		0	1	1	1	1		9	81.8182
4	FTEMP	FTEMP_1_gene_47.39	47.81	47.25	47.83	47.65	47.84		47.40	47.66	47.11	47.68	47.69			0
	FCIR			47.23	47.24		47.102			47.65	47.66	47.28	47.29			0
	Present/absent		0	1	1	0	1		0	1	1	1	1		7	63.6364
5	FTEMP	FTEMP_1_gene_5.47	5.97	5.87	5.8	5.88	5.99		5.9	5.34	5.90	5.49	5.10			0
	FCIR		5.35	5.76	6.14				6.3	6.88	6.44	6.28	6.4			0
	Present/absent		1	1	1	0	0		1	1	1	1	1		8	72.7273
6	FTEMP	FTEMP_1_gene_58.115	58.99	58.83	58.100	58.85	58.86		58.33	58.87	58.101	58.117	58.35			0
	FCIR		57.65	57.42	57.25					57.7			57.68			0
	Present/absent		1	1	1	0	0		0	0	0	0	1		4	36.3636
7	FTEMP	FTEMP_3_gene_24.5	24.62	24.73	24.21	24.22	24.84		24.6	24.74	24.50	24.23	24.9			0
	FCIR		24.85	25.24	25.26					25.25	25.27		25.84			0
	Present/absent		1	1	1	0	0		0	1	1	0	1		6	54.5455
8	FTEMP	FTEMP_4_gene_3.104	3.63	3.64	3.24	3.90	3.25		3.12	3.27	3.106	3.107	3.91			0
	FCIR		3.28			3.112			3.111		3.47	3.80 / 3.14	3.18			0
	Present/absent		1	0	0	1	0		1	0	1	1	1		6	54.5455
9	FTEMP	FTEMP_4_gene_7.50	7.92	7.40	7.21	7.58	7.22		7.51	7.24	7.96	7.111	7.112			0
	FCIR		7.99	7.113	7.100	7.114	7.101				7.104	7.115	7.84			0
	Present/absent		1	1	1	1	1		0	0	1	1	1		8	72.7273
10	FTEMP	FTEMP_4_gene_12.56	12.72	12.3	12.1	12.50	12.17		12.75	12.90	12.19	12.76	12.57			0
	FCIR		12.41		12.29	12.83	12.43		12.31	12.44	12.45	12.32	12.8			0
	Present/absent		1	0	1	1	1		1	1	1	1	1		9	81.8182
11	FTEMP	FTEMP_4_gene_41.77	41.14	41.123	41.46	41.124	41.76		41.33	41.19	41.34	41.20	41.55			0
	FCIR		41.118	41.77		41.139			41.140	41.122	41.37	41.28	41.142			0
	Present/absent		1	1	0	1	0		1	1	1	1	1		8	72.7273
12	FTEMP	FTEMP_4_gene_42.133	42.20	42.21	42.22	42.71	42.88		42.23	42.134	42.74	42.120	42.57			0
	FCIR		42.65	42.66	42.145	42.68	42.86				42.69	42.48	42.49			0
	Present/absent		1	1	1	1	1		0	0	1	1	1		8	72.7273
13	FTEMP	FTEMP_5_gene_10.91	10.58	10.14	10.76	10.90	10.16		10.78	10.79	10.18	10.92	10.81			0
	FCIR			9.36	9.21	9.37	9.23		9.24		9.25					0
	Present/absent		0	1	1	1	1		1	0	1	0	0		6	54.5455
14	FTEMP	FTEMP_5_gene_13.12	13.2	13.38	13.39	13.81	13.40		13.13	13.27	13.95	13.83	13.29			0
	FCIR		12.104	12.21	12.86	12.7	12.87		12.88	12.8	12.25	12.71	12.43			0
	Present/absent		1	1	1	1	1		1	1	1	1	1		10	90.9091
15	FTEMP	FTEMP_5_gene_20.11	20.14	20.52	20.9	20.60	20.39		20.16	20.71	20.18	20.72	20.66			0
	FCIR		19.71	19.62		19.72	20.65			20.11	20.53	20.54	20.55			0
	Present/absent		1	1	0	1	1		0	1	1	1	1		8	72.7273
16	FTEMP	FTEMP_5_gene_43.12	43.41	43.48	43.10	43.75	43.93		43.13	43.32	43.49	43.96	43.97			0
	FCIR		42.135		42.73	42.72			42.14	42.29	42.30		42.32			0
	Present/absent		1	0	1	1	0		0	1	1	0	1		6	54.5455
17	FTEMP	FTEMP_5_gene_44.125	44.179	44.151	44.123	44.181	44.181		44.125	edge	edge	edge	edge			0
	FCIR			43.102	43.63	edge	edge		edge	edge	edge	edge	edge			0
	Present/absent		0	1	1										2	18.1818
18	FTEMP	FTEMP_5_gene_8.52	8.48	8.35	8.130	8.50	8.76		8.118	8.53	8.68	8.120	8.96			0
	FCIR				7.112					8.81	8.10		8.63			0
	Present/absent		0	0	1	0	0		0	1	1	0	1		4	36.3636
19	FTEMP	FTEMP_6_gene_40.60	40.58	40.82	40.34	40.35	40.36		40.38	40.39	40.61	41.74	41.2			0
	FCIR								40.12	40.13	40.14	40.15	0			0
	Present/absent		0	0	0	0	0		1	1	1	1			4	36.3636
20	FTEMP	FTEMP_7_gene_0.4	0.3	0.51	0.19	0.20	0.21		0.54	0.60	0.23	0.6	0.89			0
	FCIR		0.4	0.37						0.51		0.38	0.20			0
	Present/absent		1	1	0	0	0		0	1	0	1	1		5	45.4545
21	FTEMP	FTEMP_7_gene_0.54	0	0	0	0	0.4		0.60	0.23	0.6	0.89	0.90			0
	FCIR		0.51	0.19	0.20	0.21			0.51		0.38	0.20	0.21			0
	Present/absent		0.37				0		1	0	1	1	1		4	36.3636
22	FTEMP	FTEMP_7_gene_33.90	33.179	33.20	33.48	33.70	33.181		33.180	33.152	33.51	33.154	33.22			0
	FCIR		34.4	34.46	34.20	34.6	34.64		34.118	34.67	34.68					0
	Present/absent		1	1	1	1	1		1	1	1	0	0		8	72.7273
23	FTEMP	FTEMP_8_gene_25.87	25.84	25.85	25.34	25.7	25.25		25.27	25.89	25.8	25.90	25.9			0
	FCIR				25.25		25.44		25.46	25.112		25.6	25.114			0
	Present/absent		0	0	1	0	1		1	1	0	1	1		6	54.5455
24	FTEMP	FTEMP_8_gene_26.79	26.7	26.16	26.61	26.78	26.48		26.71	26.20	26.9	26.51	26.37			0
	FCIR			_3.27	_3.82					25.54		25.39				0
	Present/absent		0	1	1	0	0		0	1	0	1	0		4	36.3636
25	FTEMP	FTEMP_8_gene_29.50	29.48	29.47	29.115	29.14	29.49		29.40	29.103	29.117	29.16	29.31			0
	FCIR		28.37	28.38		28.76	28.108		28.103	28.17	28.41	28.18	29.56			0
	Present/absent		1	1	0	1	1		1	1	1	1	1		9	81.8182
26	FTEMP	FTEMP_8_gene_3.96	3.114	3.42	3.115	3.109	3.44		4.28	4.24	4.70	4.74	4.26			0
	FCIR		5.81	5.25		5.30			5.86	5.87		5.111	5.33			0
	Present/absent		1	1	0	1	0		1	1	0	1	1		7	63.6364
27	FTEMP	FTEMP_8_gene_4.145	4.70	4.74	4.26	4.27	4.3		4.76	4.77	4.54	4.55	4.130			0
	FCIR			5.111	5.33	5.34			5.37	5.38		5.112	5.62			0
	Present/absent		0	1	1	1	0		1	1	0	1	1		7	63.6364
28	FTEMP	FTEMP_8_gene_4.70	3.109	3.44	3.96	3.28	4.24		4.74	4.26	4.27	4.3	4.145			0
	FCIR		5.30			5.86	5.87		5.111	5.33	5.34					0
	Present/absent		1	0	0	1	1		1	1	1	0	0		6	54.5455
29	FTEMP	FTEMP_9_gene_8.65	8.37	8.4	8.5	8.38	8.83		8.87	8.88	8.39	8.89	8.9			0
	FCIR		8.0	8.19	8.37					8.67						0
	Present/absent		1	1	1	0	0		0	1	0	0	0		4	36.3636
30	FTEMP	FTEMP_9_gene_9.60	9.45	9.6	9.46	9.33	9.34		9.47	9.35	9.98	9.49	9.100			0
	FCIR		9.91	9.37	9.92	9.115			9.93	9.39	9.95	9.96	9.62			0
	Present/absent		1	1	1	1	0		1	1	1	1	1		9	81.8182
31	FTEMP	FTEMP_10_gene_4.5	4.2	4.73	4.61	4.17	4.53		4.62	4.40	4.79	4.55	4.54			0
	FCIR		5.44	5.101	5.118	5.67			5.123	5.26	5.106					0
	Present/absent		1	1	1	1	0		1	1	1	0	0		7	63.6364
32	FTEMP	FTEMP_10_gene_4.59	4.32	4.52	4.15	4.67	4.35		4.68	5.23	5.111	5.0	5.2			0
	FCIR		5.37	5.89	5.116	5.139	5.95						6.0			0
	Present/absent		1	1	1	1	1		0	0	0	0	1		6	54.5455
33	FTEMP	FTEMP_10_gene_5.111	4.67	4.35	4.59	4.68	5.23		5.0	5.2	5.1	5.37	5.38			0
	FCIR		5.139	5.95						6.0	6.1	6.2	6.3			0
	Present/absent		1	1	0	0	0		0	1	1	1	1		6	54.5455
34	FTEMP	FTEMP_10_5.23	4.15	4.67	4.35	4.59	4.68		5.111	5.0	5.2	5.1	5.37			0
	FCIR		5.116	5.139	5.95						6.0	6.1	6.2			0
	Present/absent		1	1	1	0	0		0	0	1	1	1		6	54.5455
35	FTEMP	FTEMP_10_gene_10.9	10.102	10.8	10.116	10.43	10.72		10.3	10.119	10.14	10.120	10.121			0
	FCIR		11.76	11.3	11.50	11.4			11.42	11.55	11.78	11.56	11.57			0
	Present/absent		1	1	1	1	0		1	1	1	1	1		9	81.8182
36	FTEMP	FTEMP_10_gene_16.21	16.83	16.20	16.7	16.8	16.9		16.22	16.53	16.84	16.54	16.10			0
	FCIR		16.110			17.0	17.114				17.4	17.115	17.74			0
	Present/absent		1	0	0	1	1		0	0	1	1	1		6	54.5455
37	FTEMP	FTEMP_10_gene_22.24	22.22	22.68	22.76	22.69	22.102		22.25	22.12	22.104	22.15	22.116			0
	FCIR			23.35	23.9	23.37	23.83		23.100	23.84		23.87				0
	Present/absent		0	1	1	1	1		1	1	0	1	0		7	63.6364
38	FTEMP	FTEMP_12_1.18	1.26	1.3	1.4	1.34	1.19		1.5	1.6	1.8	1.9	1.10			0
	FCIR												0.27			0
	Present/absent		0	0	0	0	0		0	0	0	0	1		1	9.09091
39	FTEMP	FTEMP_12_3.0	3.23	3.7	3.26	3.53	3.57		3.68	3.1	3.8	3.69	3.70			0
	FCIR									1.51	1.77	1.22				0
	Present/absent		0	0	0	0	0		0	1	1	1	0		3	27.2727
40	FTEMP	FTEMP_12_gene_3.47	3.2	3.44	3.74	3.3	3.62		3.63	3.12	3.80	3.35	3.14			0
	FCIR		1.73	1.27												0
	Present/absent		1	1	0	0	0		0	0	0	0	0		2	18.1818
41	FTEMP	FTEMP_12_gene_3.74	3.9	3.60	3.43	3.2	3.44		3.3	3.62	3.47	3.63	3.12			0
	FCIR				1.26	1.73	1.27									0
	Present/absent		0	0	1	1	1		0	0	0	0	0		3	27.2727
42	FTEMP	FTEMP_12_gene_4.36	4.56	4.69	4.57	4.18	4.40		4.41	4.69	4.57	4.18	4.40			0
	FCIR				2.35						2.35					0
	Present/absent		0	0	1	0	0		0	0	1	0	0		2	18.1818
43	FTEMP	FTEMP_12_gene_4.41	4.69	4.57	4.18	4.40	4.36		4.69	4.57	4.18	4.40	4.72			0
	FCIR			2.35						2.35						0
	Present/absent		0	1	0	0	0		0	1	0	0	0		2	18.1818
44	FTEMP	FTEMP_12_gene_4.72	4.41	4.69	4.57	4.18	4.40		4.42	4.23	4.11	4.49	4.43			0
	FCIR				2.35				2.85	2.19	2.5	2.102	2.103			0
	Present/absent		0	0	1	0	0		1	1	1	1	1		6	54.5455
45	FTEMP	FTEMP_12_gene_6.57	6.13	6.54	6.55	6.14	6.2		6.44	6.28	6.45	6.46	6.47			0
	FCIR		3.50		3.63	3.15				3.31	3.38		3.54			0
	Present/absent		1	0	1	1	0		0	1	1	0	1		6	54.5455
46	FTEMP	FTEMP_12_gene_8.46	8.101	8.1001	8.44	8.139	8.45		8.47	8.102	8.22	8.82	8.23			0
	FCIR															0
	Present/absent		0	0	0	0	0		0	0	0	0	0		0	0
47	FTEMP	FTEMP_12_gene_8.89	8.71	8.148	8.124	8.96	8.88		8.90	8.60	8.10	8.11	8.130			0
	FCIR															0
	Present/absent		0	0	0	0	0		0	0	0	0	0		0	0
*Yellow column in I indicate the position of the unique gene with regards to five genes up- and down-stream of it
Text in red indicate inversions
Blocks around genes indicate that unique genes cluster or are in close proximity of each other
n/n values indicate inversions (red) and duplications (black) at a specific position
Edge indicate the presence of a telomeric region
Column P indicate the number of genes present per 11 genes
Column Q indicate the percentage of the genes from column P
