# Supplementary material for: Characterization of Host-Specific Genes from Pine- and Grass-Associated Species of the <em>Fusarium Fujikuroi </em>Species Complex
Source: Preprints.org preprint supplement (doi:10.20944/preprints202207.0007.v1), 2022-07-01
Supplement: Supplementary file 4 [file Table S4.xlsx]

## Sheet: Table S4
S4 Table. The Blast2GO data for the 72 unique pine-host-associated genes specifically for (A) Fusarium circinatum, (B) F. fracticaudum and (C) F. pininemorale.
A	SeqName1	Description	AA sequence	Location	Multiple copy gene	AA sequence (multiple copy gene)	Location (multiple copy gene)	E-value	GO IDs	GO Names	Enzyme Codes	Enzyme Names	InterPro IDs	InterPro GO IDs	InterPro GO Names
	FCIR_1_gene_33.27	Uncharacterised protein	MQTAVEYETKLKRDEFALQCLNIPRHETFEVFLIMKQRQREEEEEAERRRKAEHDLQQELKQKEHDQEEAYKQRKKPGQRSNQGIMSCFI	3324981..3326119				5.63315e-12	C:GO:0016020; C:GO:0016021	C:membrane; C:integral component of membrane			no IPS match	no IPS match	no IPS match
	FCIR_1_gene_33.28	---NA---	MTSSQPSVAAVNPPPGWPPYSSHTGQRGDEWITAYNTYVNAWMTWASTDPEEDEDKWKQALSLIYNTKCIFSRNINEKARKQMSGEEYDKVPLCWGLVILLNIFQFQITQDTLTACALQCWYPRSDISGIGPYNETGPTIRSIPVVFKSLKPVRPETN	3326483..3326752				-					no IPS match	no IPS match	no IPS match
	FCIR_1_gene_40.27	---NA---	MMGILSDASALLDGTGMDSYKHISVHGHITETVFRVFRTLMVLFCGIRIANEPRIVLHIRRRRVELEVALDDFVNCTEEVLLGCNLSPCANGIHASLSANTTQLSTRCVGAETRDELPPDVSLNGHGFSVDAQNVGTALKVRQRELDLSIDTAGSHERRIQCRGSVGGKHDLDVSTSIETVKLRNKLQHSSLNLVVSTSTIVKSSTTDGVDLVEENDTCLLCTGHLEEFSNHPCALADIFLNQLTTNNSDKGGVCSIGNSSGTEGLSGSRGTVEEGTLGRINTEVDESLRRQ	4069674..4070051				-					mobidb-lite (MOBIDB_LITE)	no GO terms	no GO terms
	FCIR_1_gene_57.14	uncharacterized protein LW93_4671	MGRRESCVGFLSKLEDCRTFAELSPNLDADLLIDTLLLLLDLLLELLDRCTIRRGTVRLENLNIPGAGVSGEMALSFPQEGIRTRLLEV	5767630..5768594				3.7142e-166					no IPS match	no IPS match	no IPS match
	FCIR_1_gene_57.52	uncharacterized protein FPRO_01869	MSQWARNSESNLASLSLDSRCHDLVEAADPLLLPNLLPEKRRSNGAKPFSDIRHHLHLLNSTQPSVEPVWGGEWMVQDKPTINRPTKKHRLACLARRTPGSHSSGRADATTDKLHGCHTMSSSPF	5774406..5775345				3.7749e-162	F:GO:0043167	F:ion binding			SIGNAL_PEPTIDE_C_REGION (PHOBIUS); SIGNAL_PEPTIDE_H_REGION (PHOBIUS); SIGNAL_PEPTIDE_N_REGION (PHOBIUS); NON_CYTOPLASMIC_DOMAIN (PHOBIUS); SIGNAL_PEPTIDE (PHOBIUS); SignalP-noTM (SIGNALP_EUK); SignalP-noTM (SIGNALP_GRAM_NEGATIVE); SignalP-TM (SIGNALP_GRAM_POSITIVE); IPR011992 (SUPERFAMILY); TMhelix (TMHMM)	no GO terms	no GO terms
	FCIR_1_gene_57.70	uncharacterized protein Y057_7009	SLVLASSGFATVLNVNVYTDAKSANAGSQQDQMVLDDKKSDAPAWKGRDERHLVPLLPEARTGVIPADVEEGLIAALGPRFANEFIKVGLESEGDMDTPTAGGCGLKCATTLIKAMPCIIAAAKCRCKEPILKCPVKLKELCNCVPCLPEKLRKFIDKIKVCQSSTLDELSDIERAIDDSLDYGNFVSFETQDVNLLAYRGDLSKTTLEEARALGKGGYCPGQYCGDNGCCLGLCLFEDECFGQELELRGQESRRLEL	5765329..5765618				6.03398e-21					mobidb-lite (MOBIDB_LITE); mobidb-lite (MOBIDB_LITE)	no GO terms	no GO terms
	FCIR_1_gene_57.8	lipase class 3	MKITNSFSSLCLMCLIIGLTFIKYTAAACCPCSIYLTCGDSSGCTVYECCSTAACNIFCCNCDGPCKGGKSTDLSDEKTANLCLSKFTAVDVNQDGMISFLEWVQSRDAFAGLGLDVPAERWNQYDWERKGYLTKDEAMDRRIASSKPGSDTKDTTLVQQPFDYQPRLQENLKPNELSRGAWTLQWFTDNDCSEGKHRTAGTKPEGCSNIAGAKGIEFTASPEFSLYVYGRQNCDGVPRMISSNPDCYPLNVKGLSFKVVG	5769924..5771733				0	F:GO:0003674; P:GO:0006629	F:molecular_function; P:lipid metabolic process			IPR029058 (G3DSA:3.40.50.GENE3D); IPR002921 (PFAM); PTHR21493:SF234 (PANTHER); PTHR21493 (PANTHER); cd00519 (CDD); IPR029058 (SUPERFAMILY)	P:GO:0006629	P:lipid metabolic process
	FCIR_1_gene_8.74	hypothetical protein FNYG_08879	MASSPPSHTRATRKKIRLTYNSPPPAPATYNGLSAVTFPENAQVTITGGKDGTQLVMAEDKNGNKGTWGLVGGEEVEEAE	804847..805323				3.33804e-13					mobidb-lite (MOBIDB_LITE)	no GO terms	no GO terms
	FCIR_1_gene_9.43	---NA---	DHKTSSLKMNPLPPPTTLDDARRQVRIRHLEQLSHANITLTPPADDEDTSLLPSCKILTKELKKWSQDHVKSIEEATLKNVLSGKDSIDWNCFFLAFMESITVYLRDWEKLHNAVQLYKSVKAGTSANGDLHKGIKEVAAVWGMEFMQICGYILTHAHQGHNDKNPKWNGPFCGAFFPKDHKQGAPYVGITFKGTDPKNIKDINVDSSFDPIQVDAKHLFGTVVSEGVYNALFGTFNNKDILSPFELILNALQDFVPKLQTEDNTEPLLHVTGHSLGGSYSSFCFAQFMMQNASLPAGARLGDLYNFGSPRVGQKAWSQAFYENLGGKFPGGAWRIVNDKDIVPQVPSLLRYKPKTGPFYHIDNGIQIYKQAKPTPIESERDGTGNVDIGLTRIGFVRK…	960146..960418				-					Coil (COILS); mobidb-lite (MOBIDB_LITE); mobidb-lite (MOBIDB_LITE)	no GO terms	no GO terms
	FCIR_2_gene_19.96	predicted protein	MNTASIFEGLAKSTSYKSPATADLQPAYKHNVSEQGRTTEDDRPAEEEPLECLVYYLFSHSIFRLARKPLIRYLRDQATIKPIRQSPSLEIITDLPSMLFGSLPLLLSIWALTSYCWIPLCGLMVWERTGSDVVYECLSWILKGFGIVMNVMGRTYEGVTTIKTSTVISNGSRRALQWVDGQMDDDGSLGSLLYPHYGTS	1974102..1974704				1.55842e-131	C:GO:0005575	C:cellular_component			mobidb-lite (MOBIDB_LITE); CYTOPLASMIC_DOMAIN (PHOBIUS); TRANSMEMBRANE (PHOBIUS); NON_CYTOPLASMIC_DOMAIN (PHOBIUS)	no GO terms	no GO terms
	FCIR_2_gene_22.10	---NA---	MDSVTILIHVLLNFWPDLASILPLAMLFACLLGNRGSTPWLGRRARPSPAQDDRHWEPKPSLQWAS	2285886..2286086				-					mobidb-lite (MOBIDB_LITE); NON_CYTOPLASMIC_DOMAIN (PHOBIUS); TRANSMEMBRANE (PHOBIUS); CYTOPLASMIC_DOMAIN (PHOBIUS); TMhelix (TMHMM)	no GO terms	no GO terms
	FCIR_2_gene_38.93	---NA---	MGYGFTSSVHHDHSLGDSHHLVGIRPLGSGGGGIVLHGTARRRPITGAIIIVIATRTTISVAVTTTATTRTISTGRATPIVVVHGRRIRSTSWGAGSTALARRHIRLSLEGHVRLEFLQREGASLSYVSNALDSLALKFTPIELLNSRSKVCCSLEFDEAGPC	3884611..3885205				-					no IPS match	no IPS match	no IPS match
	FCIR_2_gene_7.23	related to short-chain dehydrogenase/reductase family protein, putative	MPCQKNQKPSSTVPSREMSPLPDFWLPVFWKNQFRTTIELPTREKYPQVEGSTAIITGSNTGLGFEASKQLLSLGLSHLVMGVRSLEKGKVAAEKLRTIASSTRIDVWQLDMQSYDSIQAFSKRCDTELSRIDFVILNASLSPSKFELVPGTGHEVGIQVNHLSTALLTILLIPILKTKISGHGPPRLTTVNSLTAHLCKFPNKGERPLLASFDDPKITPWDSQERYGVSKLLNQLFLVRLCEKVNPDDVIINMVDPGLTKGTHLGGHHELGGIAGALAGAFFAICGRPVDRGAASYTNAVYGHGKESHGCFLMSCEIAPLAGWFYTHGDFLVDQVWNETMEELGFAGVKGIVSGV	724142..725270				0					IPR002347 (PRINTS); G3DSA:3.40.50.720 (GENE3D); IPR002347 (PFAM); PTHR43157 (PANTHER); PTHR43157:SF1 (PANTHER); IPR036291 (SUPERFAMILY)	no GO terms	no GO terms
	FCIR_3_gene_0.73	tetratricopeptide repeat protein	MVLLADKASERLDEAYLAEIEASAKKIYIDQGHAVGVMDLRFQQVSRALKKDHQYLTDELLDELKGYFARYQASDSMASYQTAIHAFLAHIPQWIAFELQMSLSHIRDELANQAGAVFLTHIGRVGLISMWLAHSGKAASAVEAAEALDTTLREGDCRWLRGIAPYLASQAYSQLHDYRKAHDRAARAVEIFQETFPSDAATARNALLQAKLELYQENNSDPKDLEEIISFADTETTRDRAAGLTLQAAQKTEMIVVQIRTLQTEQRRYWMERMLTFVNELESDSEDGDIRMAGLFQVQGMELTLPMKETDPKTWEPCLACFDKSVALYMKHLRFVEAANTRQMQSCAIYRWFELSPSAHLLQRCLDLIDISLDLFREADNVTFIATASRWRSIVVYTG…	8765..12572				0	F:GO:0003674	F:molecular_function			Coil (COILS); IPR006680 (PFAM); IPR024983 (PFAM); G3DSA:3.20.20.140 (GENE3D); PTHR43569 (PANTHER); PTHR43569:SF2 (PANTHER); PTHR43569:SF2 (PANTHER); PTHR43569 (PANTHER); IPR032466 (SUPERFAMILY)	F:GO:0016787	F:hydrolase activity
	FCIR_3_gene_2.101	alpha/beta hydrolase	MAGTYAAELSRRGVIGLAIDYRNYGQSGGAFRQREDPESKAADLAAAVEFLSHRSDVAGTGLLGICTSAGNVLYPAANNPRFKALATVAGFFLSASVAPLLHGGEEVIKRRRAEGQEAIKLYSDTQEIKLIKAYGGSANESASSGEKPYYKDVTRGNIH	286865..287344				3.5527e-91	F:GO:0016787	F:hydrolase activity			IPR029058 (G3DSA:3.40.50.GENE3D); mobidb-lite (MOBIDB_LITE); PTHR17630:SF54 (PANTHER); PTHR17630 (PANTHER); TRANSMEMBRANE (PHOBIUS); NON_CYTOPLASMIC_DOMAIN (PHOBIUS); CYTOPLASMIC_DOMAIN (PHOBIUS); IPR029058 (SUPERFAMILY)	no GO terms	no GO terms
	FCIR_3_gene_37.64	integral component of membrane protein	MAWFTTVILQAFGFTPNGPLLGSFASWAQSLIGNVAPRSLFAIFQSAAMGGYGVEILGNVVNMFSAIPTYAFARFAYSAFGQARKTENGTYTG	3750094..3750430				2.43067e-42	C:GO:0005575	C:cellular_component			IPR038213 (G3DSA:1.10.246.GENE3D); IPR009311 (PFAM); IPR009311 (PANTHER); PTHR16932:SF18 (PANTHER); NON_CYTOPLASMIC_DOMAIN (PHOBIUS); SIGNAL_PEPTIDE (PHOBIUS); SIGNAL_PEPTIDE_H_REGION (PHOBIUS); SIGNAL_PEPTIDE_N_REGION (PHOBIUS); SIGNAL_PEPTIDE_C_REGION (PHOBIUS)	C:GO:0016021	C:integral component of membrane
	FCIR_3_gene_4.30	AB hydrolase superfamily protein B1A11.02	MSESIIRKPGLAKIDPEWEAFEQQFPVPPLLGTPQQLRLRLKFPKTNSPPVGYSIRDVEVPGYLDATNQLRLYTPNDSSEPLPVVIYVHGGGWTIGDLDSEDKVCRTMCNSAGVIVASVDYRKAPENPFPIGLEDTVNEQQVFNNIESLGGASDRIIIGGLSAGGNIAAVLAQRAQNVRNIAFRGQILRVPLVVHTDAIPPELDFSSYAENAKAPILPAAAVIQCLGYYGAPPEEIRISPLLAKDHSGLPPAYIQVAGADPLRDDGFAYAEKLQKAGVPVRVSVYAGFPHAFMNFPLRSAMKSDEDLIRAIKWMLEI	445193..446464				0	F:GO:0003674	F:molecular_function			IPR013094 (PFAM); IPR029058 (G3DSA:3.40.50.GENE3D); PTHR23024 (PANTHER); PTHR23024:SF103 (PANTHER); IPR029058 (SUPERFAMILY)	F:GO:0016787	F:hydrolase activity
	FCIR_3_gene_49.72	uncharacterized protein FPRN_05255	MTSQDSHLSLSSERWRLELLLNEQATVNPQQLILSGTIPSIGLSHETDFQILQSPTTSLPHSHSFTTVLAPSEPGAQAFTSRFDVGQNGNVLSNSGWNPNDQSGGRGPNLRSSPWSKSFLACPYYIRDPIRHFGCINLKLDTYGRVKQHLKRNHLSFDANNIGGFVCESCGMVSPDESSRDIHRVSTECAQVTVANEHGLSRQAWEGLEKRLRSGSTDEEKWLNMWFVLFHQPFSASTPIKDTVMNRFFQIIRNFCQADGFGDIISLLFQEKHGVELGSEMQMYELLMKLLDFIRDSIQQLFDTQDVGASG	4889121..4890056				8.57233e-175	C:GO:0005575	C:cellular_component			mobidb-lite (MOBIDB_LITE); PTHR38166 (PANTHER)	no GO terms	no GO terms
	FCIR_3_gene_5.72	hypothetical protein FPOA_03592	MNVFSDLGPVLALFGEQFARQFLSETFTWYDHIIFACVPLGIMTAIAGAIRVEGRGVLRAFIGRARENRAAAEIDFMSSTSAEVGELFNGKGIVRTMGRSDIAQFIVFPDRFLETDEKASSENQTGTEEPQQHSPDSPDREEPEQTKERKEAQSWGIHTLKSVQGKGILSKEDYRDDLDVALLKWLKPFELPAKSRVMEPENGGDSNTSSGAQGQNDDHEYWSSLQYPNLQLNIASKKISSKQRSIELQLAAVAAVILQVSLLAIAVVIPYRVDGYGQQQPWGLPCYIIGSVLLSIGMLCCSVAIERSTEEFKWNPSNSSNNSEPSKQQVNLYWVQRKQRVSDQDFGSYIIYAQEKEFFSTSSRREDVSSNKNQDHGGNVQSHRQNSAKSEAISNMTQK…	486012..500334				0	F:GO:0003674	F:molecular_function			IPR002110 (SMART); IPR003877 (SMART); IPR020683 (PFAM); IPR036770 (G3DSA:1.25.40.GENE3D); PF13857 (PFAM); IPR002110 (PFAM); IPR036770 (G3DSA:1.25.40.GENE3D); G3DSA:2.60.120.920 (GENE3D); IPR036770 (G3DSA:1.25.40.GENE3D); IPR003877 (PFAM); mobidb-lite (MOBIDB_LITE); mobidb-lite (MOBIDB_LITE); mobidb-lite (MOBIDB_LITE); mobidb-lite (MOBIDB_LITE); mobidb-lite (MOBIDB_LITE); mobidb-lite (MOBIDB_LITE)…	F:GO:0005515	F:protein binding
	FCIR_3_gene_6.47	hypothetical protein FOVG_03557	MTKERFLPVYLDCVRRRTRRGLVFWRSMDRVLDIIVNIWSKCFSGDPGSSKRINMAIKAIEYIKTNETQSGVDNIFGVKRPFVAPTESQKRKIIEHFNGPPRISEDMQAAFQAEWEPLLRYALVAAVTGCKLCIAYFKNEGRELEEALDIDRMRNSTIYMRGC	629887..630378				5.17776e-52	C:GO:0005575	C:cellular_component			no IPS match	no IPS match	no IPS match
	FCIR_3_gene_6.65	hypothetical protein V498_08576	MYDESFPMKAVLEQRSFDKFVLLIKLGVSAEPKMLGRVTKGERRENMTTTSLRNLYSKALSDLGLAEAPPPFMQNETEKSATGSLQHRLLEDTKDEEACSVSQSEAKSEGDEQSSGSTDNRLIRSKLSELGAPCFQVATYPKGWEYHTGQTWEQVYGERRSVRYRGKRGQIKWDHKCRIRLRNIMYSLESEKSFQKECCQSTDLDTQDSLGATLLMNTCARKKPGLAANTLYFLGRDRVQGAIHQYDDNDMTAVHYAAAVG	626452..627237				2.02046e-11	C:GO:0016020; C:GO:0016021	C:membrane; C:integral component of membrane			mobidb-lite (MOBIDB_LITE); mobidb-lite (MOBIDB_LITE); mobidb-lite (MOBIDB_LITE)	no GO terms	no GO terms
	FCIR_4_gene_3.17	malate dehydrogenase, NAD-dependent	MTKIALLGAAGQIGTPLTLLCKASNLFTDIALYDIVHTPGIATDLNHIDTIATVSGYLPSNGGLAKALNGADIIVVTAGIARKPGMTRDDLFNTNASIIRDIFTQVAKTCPEAISCIVTNPVNSTVPVAAETLRAAGVFDPTRLVGVTTLDVVRASTFAAQALGGDADPNRIKVPVIGGHSGATILPLYSQAQPPIDLGAELPNVINRVQFGGDEIVKSKQGAGSATTCMAYAGFRFIKALLTARSGTPVVEEAYVYLPGISGGKEISTELEVDFFAVKVKLGQRGAEGLLPIGNLSGGEKILLGKAIEELRVNIQTGLSFVAGK	363045..3364238				0	P:GO:0005975; P:GO:0006091; F:GO:0016491; P:GO:0044281	P:carbohydrate metabolic process; P:generation of precursor metabolites and energy; F:oxidoreductase activity; P:small molecule metabolic process	EC:1.1.1.37	Malate dehydrogenase	IPR015955 (G3DSA:3.90.110.GENE3D); IPR022383 (PFAM); IPR001557 (PIRSF); IPR001236 (PFAM); G3DSA:3.40.50.720 (GENE3D); IPR010097 (TIGRFAM); PTHR11540:SF30 (PANTHER); PTHR11540 (PANTHER); NON_CYTOPLASMIC_DOMAIN (PHOBIUS); SIGNAL_PEPTIDE_N_REGION (PHOBIUS); SIGNAL_PEPTIDE (PHOBIUS); SIGNAL_PEPTIDE_C_REGION (PHOBIUS); SIGNAL_PEPTIDE_H_REGION (PHOBIUS); cd01337 (CDD); IPR036291 (SUPERFAMILY); IPR01595…	F:GO:0003824; P:GO:0005975; P:GO:0006099; F:GO:0016491; F:GO:0016616; P:GO:0019752; F:GO:0030060; P:GO:0055114	F:catalytic activity; P:carbohydrate metabolic process; P:tricarboxylic acid cycle; F:oxidoreductase activity; F:oxidoreductase activity, acting on the CH-OH group of donors, NAD or NADP as acceptor; P:carboxylic acid metabolic process; F:L-malate dehydrogenase activity; P:oxidation-reduction process
	FCIR_4_gene_3.38	putative alpha beta hydrolase protein	MENTKTHILSDGRTLAYGVYGAGGDTPAQNIPTVLHFHGIPGSHHEAAAFHASAILHGIRIVAISRPGSSLSTPQPNRTLLDFPADVVALADHLKIQRFAVLGFSAGGPFALACWHCIPRTRLIGASLVASVLPPSLGSEGMNTMTWTIFKVARWAPGLLAWIFDWKLGSLARDEQHPERLEQQWEADLASNHGPDYSAWKGDVELRSALVKSLREAVRKGSSSVAWEYRLLGMDWGFELGELDVEPGQMVFWQGERDTNVSMATFRKVASIIPEAKPCVSKGDGHLSLMKQENIMANLKDILHS	289951..290868				0	F:GO:0003824; F:GO:0016787	F:catalytic activity; F:hydrolase activity			IPR000073 (PFAM); IPR029058 (G3DSA:3.40.50.GENE3D); PTHR10992:SF740 (PANTHER); PTHR10992 (PANTHER); IPR029058 (SUPERFAMILY)	no GO terms	no GO terms
	FCIR_4_gene_39.86	hypothetical protein FOQG_19212	MAVRLAKASDLAATSRIAFRGFSLSPWNAFYRPFASAYPQDVEKSYLREQQEALGDPSKLFTVVELQSEQVVGFAIWNFTQQQQQQRKSDTAAIDLADEKGS	3905149..3905457				1.05319e-50					G3DSA:3.40.630.30 (GENE3D)	no GO terms	no GO terms
	FCIR_4_gene_40.48	hypothetical protein FNYG_10021	MERSHFDRRPPMYSRELDPSEAAPPYREIPSPPPYPTVPSPEYLNEKFRYFYLYKKKDAWLPALADFLAKNKDYTFELFGNDTELRIILPEDCYMSMEFEELRNKRKKVEAALEKGKVLRYWQIDRPKNYSTQVGLIKSKLRTEYQKRLEQDELFRRTEATKTASAISKELSRSVRDFFSLF	4042782..4043330				2.48929e-66					mobidb-lite (MOBIDB_LITE); mobidb-lite (MOBIDB_LITE)	no GO terms	no GO terms
	FCIR_4_gene_42.78	putative P450 monooxygenase	MEHKQLAVSVLPEASIDSNNMQQPMQNVSMRVIGGFIKQNPAVDYLLKADGYQLLQASLAALFAYVLISSLTVKSTVPDGVPFPWVDTKSKSFFANWRVGKLYAFNSVRQWLAQGSEKFLEKGKSYALPDFYGRRPYIIVPYHRTKLLLDRPDDTTSLRDAANDIVVSDYSFPDSKIFRDHYGAQIMYRHFPRALPRLVGEIWDKVTCICDKDWGTTPGEVREISTYHKSFKMIVSLASRMLLGTACSRSEDFLANVREFSLDVFRCMALDALLSRGLTGILGPYLVSLPNRWHVNRIHKHTMPLIKKRLEDLAFNDANPDEERAVPDDYISWHIRFAQTERNPAALEPYYIASSMLSMRFATASSTRYALTNLFLDIFSTKPEEGVVESLREEIERVY…	4304250..4305612				0	F:GO:0016491; F:GO:0043167	F:oxidoreductase activity; F:ion binding			IPR036396 (G3DSA:1.10.630.GENE3D); PTHR24279:SF68 (PANTHER); PTHR24279 (PANTHER); IPR036396 (SUPERFAMILY)	F:GO:0005506; F:GO:0016705; F:GO:0020037; P:GO:0055114	F:iron ion binding; F:oxidoreductase activity, acting on paired donors, with incorporation or reduction of molecular oxygen; F:heme binding; P:oxidation-reduction process
	FCIR_5_gene_0.123	cytochrome p450 3a17	MAHYDFNIGLPDFASRLGSSKFAPLLLIGAGLLVTSLAATAIYRIWFHPLSIFPGPKYLAITNVTERWMSNTSGTWIWKVSGLHRTYGPIVRIGPNRLAIDGSIGWFQVYAMRGKDDEFPKYPEYIFPGDGLSILGANQVNHRRHRRQFWSAFNDQALVEQEIVIQPYTDMLLQRLSERAKEGKPINIVDWINFLLFDIAGELVFSQPFDCLDKQEYHPWVSNFFRAVKGNAVNRFVKHYPITSPLINFLFTGKEQIQREADHRNMTFHHAMQRMKLGEQPTPGRRDFMSFLMRRNRDGGGLTDPEILVDCPVLIGASSETTTTALSGFFFYLGSSPQAYQRLVEEVRSSFNAESEIDMKSTKRLEYLNATVDEALRVYPPAAESPPRISPGAEVEGKY…	72380..74047				0	C:GO:0005575; F:GO:0016491; F:GO:0043167	C:cellular_component; F:oxidoreductase activity; F:ion binding			IPR001128 (PRINTS); IPR002401 (PRINTS); IPR036396 (G3DSA:1.10.630.GENE3D); IPR001128 (PFAM); PTHR24305 (PANTHER); PTHR24305:SF113 (PANTHER); TRANSMEMBRANE (PHOBIUS); NON_CYTOPLASMIC_DOMAIN (PHOBIUS); CYTOPLASMIC_DOMAIN (PHOBIUS); IPR036396 (SUPERFAMILY); TMhelix (TMHMM)	F:GO:0005506; F:GO:0016705; F:GO:0020037; P:GO:0055114	F:iron ion binding; F:oxidoreductase activity, acting on paired donors, with incorporation or reduction of molecular oxygen; F:heme binding; P:oxidation-reduction process
	FCIR_5_gene_14.66	---NA---	MPLVRPPLGADLGGAKHLPSGSASTNRLPSGRQTVYEHLPSGDVSLNRLPSGRQNLGHLPSGSVSMVTPLPTNVRGGTDVVMKGTEPSERPSHGHTVDSKDDDGNVGALTRESEFDEFPDSDLDGLLEADIEQLVGPALLRAPIAEADEPETRENEFIRASDPASGSFGSAVFASITPRTTHWDSSCHR	1411073..1411725				-					mobidb-lite (MOBIDB_LITE); mobidb-lite (MOBIDB_LITE); mobidb-lite (MOBIDB_LITE)	no GO terms	no GO terms
	FCIR_5_gene_31.37	---NA---	MKEAKSLIGPIEIANPGIPRSITDSVSETSETVRKDQDGVWRVNGDDDVGENMANSASDANSSLSNASMQCIVQYCC	3111249..3111482				-					mobidb-lite (MOBIDB_LITE)	no GO terms	no GO terms
	FCIR_5_gene_43.57	hypothetical protein FOVG_07070	MPIRMKRLSRSDPDYKEHENKFYHSWRHDEKSAKVKNGARYKRLYHGTSRACHIGESGNDLKLCYNDDCGTCGILRQSFKLKYAGEFIVEERLGSALTSQDDEGMFGPGIYSTPTSSNVYVKNHHVSSNLHAMFICYVVANKPQRKLLADHDITRPSRGYNCVEGVTIDNGGSLLYPEFVVYREDAIVPVGLIMYTRKGWEPL	4327748..4328698				6.35594e-115	F:GO:0016757	F:transferase activity, transferring glycosyl groups	EC:2.4.2.30	NAD(+) ADP-ribosyltransferase	G3DSA:3.90.228.10 (GENE3D); PTHR31681 (PANTHER); PTHR31681:SF22 (PANTHER); SSF56399 (SUPERFAMILY)	no GO terms	no GO terms
	FCIR_5_gene_43.75	probable subtilisin-like serine protease	MLSFLKQLAIAACVPLLVTASYPIAVIVESDGTSHWEDAEGLTRAAAVSLRNVDLACTVSRRYAYNHWSFRGSSLSIDCNTDLIPTKSIVTTIRSIEGVGNVWPITTEKPPSFSSRGTGISKTKLFRRRHEQNNHERGLTLNNNLNHRSEADSDTVSTHIDTGVARLRAENITGAGIRVAVLDGGFDLTVPGLSLTSVDYTHDMINGGDEVQDECWFHGTHVLGIIGAKGNGAEQDVSGVAPDATYELFRIQSCDSSSATEDARLASLIDAADRGVDITTCSYGSPGAWPEDPWTSVADRIAANGTLVFFPAGNRGPGIFTGNSPADGDYVTAVGSVDNSVTPYYSWEATWSTVNSSAAGSFSIVPSSPFNFPNNTKLTVWAPDVSASDDCLPMPDRSS…	4334128..4336980				0	C:GO:0005618; F:GO:0008233	C:cell wall; F:peptidase activity	EC:3.4.21	Acting on peptide bonds (peptidases)	IPR015500 (PRINTS); IPR036852 (G3DSA:3.40.50.GENE3D); IPR010435 (PFAM); IPR000209 (PFAM); PTHR43399 (PANTHER); SIGNAL_PEPTIDE_C_REGION (PHOBIUS); SIGNAL_PEPTIDE (PHOBIUS); SIGNAL_PEPTIDE_N_REGION (PHOBIUS); NON_CYTOPLASMIC_DOMAIN (PHOBIUS); SIGNAL_PEPTIDE_H_REGION (PHOBIUS); SignalP-TM (SIGNALP_GRAM_POSITIVE); SignalP-noTM (SIGNALP_EUK); SignalP-noTM (SIGNALP_GRAM_NEGATIVE); IPR036852 (SUPERFAMIL…	F:GO:0004252; C:GO:0005618; P:GO:0006508; C:GO:0016020	F:serine-type endopeptidase activity; C:cell wall; P:proteolysis; C:membrane
	FCIR_6_gene_1.117	hypothetical protein FOTG_11442	MDYPNSVTAAPLIELSHMVQRREIRAASEDWTGITSSAKRRKLQNRLNQRAYERRKASRRSASLHSEQGSRSRYVTMATADTPDAPEPPSTTQYLTMIKSPTGYTPESGCQLLRPGAQGAIREFVKKAYEDYVLGCPQPWYLSTLIQVNVFSALVQNGVALGFSDHWQRKGVISPFSILGPLQSHDSYPINLQPTALQRTVPHHPWIDLFPIPQMRDNILLSLHRLDMDELCGDLLDVKPGLDGKPSLIVWGDPWDLHGWEASPLFLQKWRWMLEGCRDILHATNYWRESRGEDKIPF	151735..152683				0					IPR021833 (PFAM); mobidb-lite (MOBIDB_LITE); PTHR38116 (PANTHER); PTHR38116:SF3 (PANTHER); cd14688 (CDD)	no GO terms	no GO terms
	FCIR_6_gene_1.32	related to alcohol dehydrogenase	MPLPQKSTQWVVKRFDGPSGLEMQVAPIPQIGPNDVMIKIHAISLNYHDVGTLGGHFEHSLKDVVPVSDGSGVILAVGSNVQSFQIGDRVTTVMNGAHQSGPIKPHYMNALLGNACHGVLQDFVEGSTLPVAGLTAWNALFGAQGRPLLPGQWVLTQGTGDVSTFAILFAKVAGAKVIATTSSAEKAKRLRDMGADHVINYREVESWGAQAQALTPGAEGVDVVVEIGGGATLKQSLAAVKMDGLISVVGVRAGAHPEEQPVLMDMFFRFCTTRIAYVGPHVQFEEMNRAIEANSIKPVIDGRIFSLEEARDAFEYLESMKHFGKVCIEVVKGV	149971..51273				0	F:GO:0016491	F:oxidoreductase activity			IPR020843 (SMART); IPR013149 (PFAM); G3DSA:3.90.180.10 (GENE3D); IPR013154 (PFAM); G3DSA:3.40.50.720 (GENE3D); G3DSA:3.90.180.10 (GENE3D); PTHR45033 (PANTHER); PTHR45033:SF2 (PANTHER); cd08276 (CDD); IPR036291 (SUPERFAMILY); IPR011032 (SUPERFAMILY)	F:GO:0016491; P:GO:0055114	F:oxidoreductase activity; P:oxidation-reduction process
	FCIR_6_gene_2.131	Transcriptional activator	FILSIYLSGAMTKGLGVRQYRACVRCRSRKTRCDLGLIGDAGKPPCAKCLREGAECILADSRRGGDYSHHRRSRQTTQGYRGKKDRSVSSSDHLSPRQKTIAKSREGNVHDKLQNPSDALLVLAHAAGQPEDEHGLDADLHASNQYDSQENATEASPSTITMQIAHPGHLQLGMASEATVNDYPLVKDGTLDPMILIQLLRQYAESFHCFFPIVPQNVLKPECILDTIKKETFLLTAVLIIASKDRPDLTATHKSIWEYMRGLILNVVLGKASVRQVGTVEGLLLMGEWTLHNRTQVDDGDEAAAWSIVGLAVRLAYLLRLEDSGFKGEDVELHSVHRERLAWTFTYLSDRQISIRMGQAFWCRGPALSARFTARDFPALQPKRSDDDDFASFIQAQVE…	202005..204366				0	F:GO:0003677; F:GO:0003700; C:GO:0005634; P:GO:0009058; P:GO:0034641; F:GO:0043167	F:DNA binding; F:DNA-binding transcription factor activity; C:nucleus; P:biosynthetic process; P:cellular nitrogen compound metabolic process; F:ion binding			IPR007219 (SMART); IPR001138 (SMART); IPR036864 (G3DSA:4.10.240.GENE3D); IPR001138 (PFAM); mobidb-lite (MOBIDB_LITE); PTHR31644:SF1 (PANTHER); PTHR31644:SF1 (PANTHER); PTHR31644 (PANTHER); PTHR31644 (PANTHER); IPR001138 (PROSITE_PROFILES); cd12148 (CDD); IPR001138 (CDD); IPR036864 (SUPERFAMILY)	F:GO:0000981; F:GO:0003677; C:GO:0005634; P:GO:0006351; P:GO:0006355; F:GO:0008270	F:DNA-binding transcription factor activity, RNA polymerase II-specific; F:DNA binding; C:nucleus; P:transcription, DNA-templated; P:regulation of transcription, DNA-templated; F:zinc ion binding
	FCIR_6_gene_2.142	glycoside hydrolase	MSPGTYRLRAVVKNSCGESASIAQAVNVKAPLVKAEANGSVITSGLLPQISPSIEGINLRDTTVTLGPDGTYYLSGTGADNDAWVHNEGINLWKSTDLKTWSYVGLIWSFERDGSEDEKTWWWYKEEHLFRAVWAPEFQYLNGNFYIVYSLQSKGSKLLVSTTKKPEGPYKVAGGEDTILFNNIDGSLFTSITDPRSGYLCYENGNVVKMNGGWNATVGDVTRMNVGDEGCFVFQWKDKYYMSVAKFMAAGGHYSSYVGIASHPLGPYSQFHEAIPCGGHNTFFKDRCGTLWGTFFGNDKEAPWREKPAIVKMATRSDGTLYPDENQDVMGC	195453..196479				0	P:GO:0005975; F:GO:0016798	P:carbohydrate metabolic process; F:hydrolase activity, acting on glycosyl bonds			IPR023296 (G3DSA:2.115.10.GENE3D); IPR006710 (PFAM); PTHR42812 (PANTHER); PTHR42812:SF5 (PANTHER); IPR023296 (SUPERFAMILY)	F:GO:0004553; P:GO:0005975	F:hydrolase activity, hydrolyzing O-glycosyl compounds; P:carbohydrate metabolic process
	FCIR_6_gene_2.2	Lactose permease	MSTKAAGTARHDRNVGDVAAASEVSRLLAEDKTPWHQKRNFRRLYGLLVPAGLGVEITTGFDGSVLNGLQAIDKWQSHFGHPEKATLGLISASMAIGSVAAVPIIPYLNDRWGRKMSVILASIIVTIGVIIQTASINIGMLIASRVIMGFGLTICLSGAAQLLTELCYPKERAVIIGCFQVSWYVGSILAAGLTLGTYDWTSDWSWRLPTIFQIVPSLLQLGFVWFVPESPRWLISRDRHEEALAILVEYHGEGDPNSAFVAAEFRQISEALRLEKEASTRPWRELFTARTNLRRVAVALCVGLFSQWAGNGLVSYYLAKVLATVGITSRLRQQQINLSLSCWNLLTGAAAANFGTDFFPRRTQLLIGFGSMCAIFACWTGASAVFAGDETNNSAAIAV…	192821..194510				0	F:GO:0003723; C:GO:0005575; P:GO:0005975; P:GO:0006464; F:GO:0016301; F:GO:0016798; F:GO:0022857; F:GO:0043167	F:RNA binding; C:cellular_component; P:carbohydrate metabolic process; P:cellular protein modification process; F:kinase activity; F:hydrolase activity, acting on glycosyl bonds; F:transmembrane transporter activity; F:ion binding			IPR005828 (PFAM); G3DSA:1.20.1250.20 (GENE3D); PTHR23500:SF145 (PANTHER); PTHR23500 (PANTHER); TRANSMEMBRANE (PHOBIUS); NON_CYTOPLASMIC_DOMAIN (PHOBIUS); TRANSMEMBRANE (PHOBIUS); CYTOPLASMIC_DOMAIN (PHOBIUS); CYTOPLASMIC_DOMAIN (PHOBIUS); TRANSMEMBRANE (PHOBIUS); TRANSMEMBRANE (PHOBIUS); NON_CYTOPLASMIC_DOMAIN (PHOBIUS); TRANSMEMBRANE (PHOBIUS); CYTOPLASMIC_DOMAIN (PHOBIUS); NON_CYTOPLASMIC_DOMAI…	C:GO:0016021; F:GO:0022857; P:GO:0055085	C:integral component of membrane; F:transmembrane transporter activity; P:transmembrane transport
	FCIR_6_gene_2.26	phytanoyl-CoA hydroxylase	MAPSRTEILPAGEAATLSADKSKVSNEASQDPYGHYFPAHPATLSLESNYGPMDPDTIGYLQPTTKDTPIEVMRERFERDGYLFVKGCIKRQTSLDCRRDYFTHMAPSGLLQEGNDPVDGIYSGADTRKYLPPGNLRRLFGLKDDPDSERYVDLMISAHEASFYVEFCKNKQLHDFVRQFTGWKNPQMLQRTMLRAFVPNSELTPVHFDQMYLRAGPPTSLTAWIPIGDVSLEGGGLMYLQASTDIGKKTEDDFAKKAYNLTDEERVSAFNKNMNDGGFLSRDTVAYGKEKQRKWLVAEYEAGDVIFHNPYMVHASCKNRDPRNKIRLATDVRFVDPEKPYDTRWMKVYRPLDGL	200336..201526				0					G3DSA:2.60.120.620 (GENE3D); IPR008775 (PFAM); PTHR40128 (PANTHER); SSF51197 (SUPERFAMILY)	no GO terms	no GO terms
	FCIR_6_gene_2.35	amidohydrolase-like protein 2	MTGTIAIEEAIINPKYLYTVEKYIPLLSHYANFGASVKDGLLDVHQKRLDSMNKHGVEYMVLSINSPGSQDEPDPSVAEKMVYDNNNFLAAEVKKNARPVAELKRAIQELGFHGVLLNDWQTTKGEDGSEIRKYYDTPEYDPFWAAIQELDVPVYLHPRYPLPETLTEPWESRSHLLGASVGFSLDLSFHLYAIRSSGTLDRFPNVKIISGHLREGIPFNLWRASYWYDHMRGTSARRSQHNYAYYWRKNFYVTTAGTYTTPGLKLAIGELGIDRCLYSIDTPYNNIEEAQTRWKDVDLTPTDKILVGRDNAIKLLKLPLELRSSQN	241371..242549				8.54602e-116	F:GO:0016829	F:lyase activity			G3DSA:3.20.20.140 (GENE3D); IPR006680 (PFAM); IPR032465 (PANTHER); IPR032466 (SUPERFAMILY)	F:GO:0016787; F:GO:0016831	F:hydrolase activity; F:carboxy-lyase activity
	FCIR_6_gene_36.35	Sphingoid long-chain base transporter RSB1	MATFDRNLCTLATCSVEKFGWYHYVPNLGANAFYLAVFAIFAIIQLYLAIRYRVWGTFAVGLVLGCVTEAIGYAGRVMQARGDGIFKKKYFVIQLVCLTIAPALISAPIYLSLGRVVKAYGRQFSLMSPRTYAVIFICSDVVSLILQAMGGGLAATGKTQKKVDTGVHILVAGLAYQVLSLAVFIGLATHLWSRVRHMGTKDANPRFTELRASRQLKSFIWALSIATITITIRCIYRVVELSGGFKSEAANDEPSLMVLDGPMIMAALLALTVCHPGPLFFGDWKRLSQDSGYPGISEDIEQAKQGVERK	3601494..3602533				0	F:GO:0003677; C:GO:0005634; P:GO:0009058; P:GO:0034641; F:GO:0043167	F:DNA binding; C:nucleus; P:biosynthetic process; P:cellular nitrogen compound metabolic process; F:ion binding			IPR007568 (PFAM); IPR007568 (PANTHER); PTHR31465:SF9 (PANTHER); TRANSMEMBRANE (PHOBIUS); TRANSMEMBRANE (PHOBIUS); TRANSMEMBRANE (PHOBIUS); TRANSMEMBRANE (PHOBIUS); CYTOPLASMIC_DOMAIN (PHOBIUS); NON_CYTOPLASMIC_DOMAIN (PHOBIUS); NON_CYTOPLASMIC_DOMAIN (PHOBIUS); NON_CYTOPLASMIC_DOMAIN (PHOBIUS); TRANSMEMBRANE (PHOBIUS); CYTOPLASMIC_DOMAIN (PHOBIUS); TRANSMEMBRANE (PHOBIUS); CYTOPLASMIC_DOMAIN (PHO…	C:GO:0016021	C:integral component of membrane
	FCIR_6_gene_40.25	hypothetical protein ANO14919_100200	MRSKCRKAYPETTVKRQENTSQVVDYSSRFVEKISEVAKSINVSAGSSIKSGGIIGSGRSVTLDEAKFTESDLNAVVSVKVINRTTELLGDVKFEDPGLELTNDQFFETYGNCYISGVLQPVMDIQDKTKIKQAIKGMVNSSGTQSGFILEENGTNKGYNAAMSKTEMTITVSWSGGGQIKAVCWDESDEKEEFENDKTDEDKAVKKVLLQSLYAPGLEFSFMEDEKNEFSTDEAQKKFEGFWVGLPVGGASGDFFNDGRHVAGVVDRADYPVLIEIQMIPHQDNATLVGWIKTHYKCFCLSSGNLDSPSAGNIRLELTEGEHVVGVRMLKIQEGSGTLIGIVFIELTTSKARVVSVGSSNGLRIANSLPDKHT	4005684..4007611				6.94957e-43					no IPS match	no IPS match	no IPS match
	FCIR_6_gene_40.57	---NA---	MDGIEEPSAKNPALSWVPSYEAQRKAWANKFMASYYTPLASDQTIFGLYLSECMKTYVSVLEAKQLFEIISKNPIGEISEFGIVDLRDTSFKTKIKTAIGMPFQDAPEVEAMKESKDSKA	4004058..4004420				-					no IPS match	no IPS match	no IPS match
	FCIR_7_gene_1.36	C6 zinc finger domain-containing protein	MVNAGRRTKSCSMCRERRVKCDLQKPSCQRCTQAGRPCPGYPESWDVMLRMQNKYAEDKVQTRVQKAKTERMEQARREAATVPRGVHITAEVHSWNRFYNDYAIHSGITLFNVLPRVYTSSSSTCFQEALHAVALVSSARQLQQSGLMVLARRHYGEAITALNIALDDTLLTADDSVLVALLLLSLFEMIVPECFRKDADFQCHIHFRGALLLLRWRAERARNSELDESCFMFLSHICLMSMFLNNEPFDVKWLALEIFAVPWIKGPLLEPVLGRVVDFKRHALAQATIGHHSSRIEVIQLIKDGITICEDLDATATSVKASSNPDLPSHEQPKAFNNMFEVSTKTTEAIARSLYQTVRYHVVELVSSLVAFVEEGGGTRHELHYKFNPSMRYMVLEQT…	155926..157520				0	F:GO:0003700; C:GO:0005634; P:GO:0009058; P:GO:0034641; F:GO:0043167	F:DNA-binding transcription factor activity; C:nucleus; P:biosynthetic process; P:cellular nitrogen compound metabolic process; F:ion binding			IPR001138 (SMART); IPR001138 (PFAM); IPR036864 (G3DSA:4.10.240.GENE3D); IPR021858 (PFAM); PTHR38791 (PANTHER); IPR001138 (PROSITE_PROFILES); IPR001138 (CDD); IPR036864 (SUPERFAMILY)	F:GO:0000981; C:GO:0005634; P:GO:0006355; F:GO:0008270	F:DNA-binding transcription factor activity, RNA polymerase II-specific; C:nucleus; P:regulation of transcription, DNA-templated; F:zinc ion binding
	FCIR_7_gene_27.82	hypothetical protein FVEG_17053	WKFQIAKTDELAEIGGRGVVLGIGASCGRWLCHGNAVLWPPRRCRCSRLNSGCIALGCRIPLNYVSIVQEVVESWLFYLWMMLVSWPDIVHGQDGWLFQGKGSDLGVTYYAQHAEILAEEWNCSFVEALDWPWM	2764309..2764743				2.78855e-23					no IPS match	no IPS match	no IPS match
	FCIR_7_gene_3.47	---NA---	MALAKAKRLRYDLARSTRAVNLIMLAPLPPLTKRITGPSEARTACPQGENVSQAVQAVRAAQALFSTPAIIPAPMSYRPNRAHAKAQAEAKKTRYDAVMSASVVTPMRIRDQGFPRQGDSRPAACNSNLSKYKPGLGASSFSDEEE	354353..354793				-					mobidb-lite (MOBIDB_LITE); mobidb-lite (MOBIDB_LITE)	no GO terms	no GO terms
	FCIR_7_gene_3.5	hypothetical protein FPRO05_10752	MDNHRLKERDNPHPPKHPFSAPSTMFDNSASEKETARERYFRSTQDGDRTDACHGRASDAGRGNIGPDMNQDNIKSTPTLTERQGIHISQGSHHERLARRTKPDRIAYAKRIKIQYDILMSENNSRPRRPMYLRRPASSKPCVNCGGKGHQLADCITTVHGYINAASSARLTAIALTTVNLLVTDRAGKPALAQRWALLYEFLEAKETRDIPPPTGFPWTVKFAEDMFEGKHGNPVYEIQREFDATHNPKVLPVDTTVRSLPDVWSYYWFLECRPFPLRAHISRF	338083..339238				2.89707e-102	F:GO:0043167	F:ion binding			mobidb-lite (MOBIDB_LITE); mobidb-lite (MOBIDB_LITE); mobidb-lite (MOBIDB_LITE); IPR001878 (PROSITE_PROFILES)	F:GO:0003676; F:GO:0008270	F:nucleic acid binding; F:zinc ion binding
	FCIR_7_gene_3.54	hypothetical protein FOYG_11646	MAASLKLEPRPELSEGAPVTRLALQDKWFACKAERIAFGNSVLDAKARSDQLAVDVEKLKAEKAQVEREKQIAETKIEALEAEVRHQKEAIERLQEVLKSHHLL	387643..387957				0.000274073					Coil (COILS); IPR036149 (SUPERFAMILY)	no GO terms	no GO terms
	FCIR_7_gene_30.111	P-loop containing nucleoside triphosphate hydrolase	MVIGVMGVTGSGKSTFVRTASGDNGVIVGHSLKACTQEITAFQFNSNGQNIILVDTPGFNDTYKSDTEILLDLAKWLEVTYRQNAKLTGILYLHRITDVRMDGSAMRNLKMFRKLCGEDPMKNVIILSTFWGQIDNERAIAHEAELKTNPDFWGSMIEHGAQVLRFDGTQQSAIDTLMSLATKAKMTLDIQRELVDEEKPLGETAAGNAVNEELHHLEKKYREKLDEIQQETAAALAEKDVQYEQILKAERQKMEQKLERIHSDQEMLRQERREEIRRIEADNKRKISLLQREYDGKLQRQQLEAHRLRDEDKAEMREQMREARLQSTTMLAQFRGQIQEIQDRSDEQIREMRDENEVLRMEARNNPTQGNLGGKLAQLVASGALAAIDPLAIPVALAS…	3073538..3074817				0	F:GO:0043167	F:ion binding			Coil (COILS); Coil (COILS); Coil (COILS); Coil (COILS); IPR006073 (PFAM); G3DSA:3.40.50.300 (GENE3D); cd00882 (CDD); IPR027417 (SUPERFAMILY)	F:GO:0005525	F:GTP binding
	FCIR_8_gene_1.117	dephospho- kinase protein	MSKLFAVTGQNNARNGGKRVVDTEILIREVQHNSRLSSCYQTAVARMNYLHSRYRQAGKILDEDLLHTLGSSVVEIFRIFESEEWRPLSDVEKCAVGVVHMALGQDMEIPFKPLPSSSTGWTDGVHFATELRDWTLCYEENVALPTEANDRYVRVYVDGLFPSLTLRLTTLLRKIIGVELGDVMRESLGIESTGPVLSLVLSGVKTLRRLALRHFSLPRPAFLASKAIAESPNPDTGLYNLTHFSAEPWYTKPSWWTTHGPSAQMIRVLGGKIPESVSSKFKPQGYDLTTIGPQPQEGKGMDSMAATISGFESQDLTTCPFKNFKS	161973..163010				0	C:GO:0005575	C:cellular_component			PTHR36124:SF1 (PANTHER); PTHR36124 (PANTHER)	no GO terms	no GO terms
	FCIR_8_gene_1.139	phytanoyl- dioxygenase family protein	MESMPEAPNSVIINRETGAAMRLGEKAPVTPHLQKLIDETLSNGYVIIPNAFTNAEIEEANAELRRLASSPEAGPAVSGGRNRFEGLRTNRIYALLNKSRVFDKFVLHPDILGLNEYFLDQGFLLNAFHSINIQPGEAPQPIHHDDGFITIPRPHRPFGTAIMVALDSYTETNGATVVVPKSHTWDSSHVPTPEEAQPVIMEKGSVVYFLGTLWHGGGKNVSDKERRALTVQYCQPWIRPLENQILAVDWEKLDKIPPRLVDMLGYQVGAPFVGYVDGISPRRAFERKMREKHAVDGYDTKL	159727..160681				0	F:GO:0016491	F:oxidoreductase activity			Coil (COILS); G3DSA:2.60.120.620 (GENE3D); IPR008775 (PFAM); PTHR20883 (PANTHER); PTHR20883:SF19 (PANTHER); SSF51197 (SUPERFAMILY)	no GO terms	no GO terms
	FCIR_8_gene_22.70	related to dienelactone hydrolase	MGQSSSQQATSEPYLAKPSGSCCLKGTIHEGESRGTWETIADVETYISKPVPEKANGNILLYFPDVWGMFPNGLLVMDAFADAGYLVLGLDYFRGDPVWKHRKDRHTQNPDFDYEAWKRKHTAFADIAVPKWVAAVKKSYGTNTTKFACVGYCFGAPYVCNELKGDTVTVGAFAHPAFLKEHHFTDLKKPLFLSCSEVDHTFDVPSRRRALDILQTNKKIFHYQVFSGVEHGFALRGDPKDPYQRWVKEQSLAGIVAWFDYWLSQ	2214670..2215621				0	F:GO:0003674	F:molecular_function			IPR002925 (PFAM); IPR029058 (G3DSA:3.40.50.GENE3D); PTHR17630 (PANTHER); PTHR17630:SF44 (PANTHER); IPR029058 (SUPERFAMILY)	F:GO:0016787	F:hydrolase activity
	FCIR_8_gene_22.71	related to short-chain alcohol dehydrogenase	MAPPRAFDFSGDVAIVTGAGSRIDGEIGNGRAAAILLARHGAKVALVDFNVDWAKETKRMIDEEGGISEVIQADVTREESCKNAIDKTVELWGALHILVNIVGVGGAMGDATSINLDAWDRDFRINVTSMVMMSRHAIPEMRKQGRGSIINMSSVSGLLGGNPSLLYPTTKGAIIQMTRAMAAHHGRENIRVNCVAPGMVYTPMTRGRGMTDEMRQARINQNLMKKEGTGWDVGYAILFLASKEAGWITGLIMPVDGGTTAGKADRPALKADTLAEANTGIQN	2216350..2217480				0	F:GO:0016491	F:oxidoreductase activity			IPR002347 (PRINTS); IPR002347 (PRINTS); PF13561 (PFAM); G3DSA:3.40.50.720 (GENE3D); PTHR42760:SF63 (PANTHER); PTHR42760 (PANTHER); cd05233 (CDD); IPR036291 (SUPERFAMILY)	no GO terms	no GO terms
	FCIR_8_gene_22.81	related to DAL5-allantoate and ureidosuccinate permease	MSDTPKPIVESPPSVEAIEDSELKGSRTEMDVHDRENAVGYSEYLEARDIEFSDAEAKKLRWKLDLVILPMFLVTQALQFMDKTSLNYANLFGYQEALGLKGNQFNYLSAMVYAGYFFGQYPCGWLIGRFPAQKFMAISVFLWGLMVIIITQSRDYSSALAVRFIMGVFEAAVTPGLTLMTGFWYTRREIPLRQCIWYSSLGWGGIVGSYISMGVSKLPVDLKPERWELIFFILGGATCLWAFVIWFLLPDSPSNARFLNHRERLIAVKRVASNETGIKNKAFDKDQVVLGFTDPKTLLLFTSVFAAAIPNGVVNSFSTIIIRDMGFSTTRTTQLKSVGDAVQIIGLIIGGSIILNVPNSRLLTATVANMLCTISAACMAYLPRDNTWGRLVCFWLVNT…	2212260..2214230				0	C:GO:0005575; P:GO:0055085	C:cellular_component; P:transmembrane transport			G3DSA:1.20.1250.20 (GENE3D); IPR011701 (PFAM); G3DSA:1.20.1250.20 (GENE3D); mobidb-lite (MOBIDB_LITE); PTHR43791 (PANTHER); PTHR43791:SF70 (PANTHER); TRANSMEMBRANE (PHOBIUS); TRANSMEMBRANE (PHOBIUS); NON_CYTOPLASMIC_DOMAIN (PHOBIUS); CYTOPLASMIC_DOMAIN (PHOBIUS); CYTOPLASMIC_DOMAIN (PHOBIUS); TRANSMEMBRANE (PHOBIUS); NON_CYTOPLASMIC_DOMAIN (PHOBIUS); NON_CYTOPLASMIC_DOMAIN (PHOBIUS); CYTOPLASMIC_…	C:GO:0016021; P:GO:0055085	C:integral component of membrane; P:transmembrane transport
	FCIR_8_gene_22.82	related to pathway-specific regulatory protein	METNDEQGQGHSSARSKKQRMSRKYRGLTCANCRAKKVTISSVRCEGSQPTCKTCEVYHVECRYDKPPPLSQVVAMARKLQEAEEMIERLQGRDGSINQQNMRASISESVAPASSPFVTGDLSTRVPLSSGHSIEPVALEKSPVTNQSRLRDPPRPAAAIDGTSQDGLAIDLSVDEHGKICYYGPTSAVHEPLGLASPSTNSMSRGDGSKRTDVRAYLVSRARESTIWEEFALGNASLQLGLPRQVMAKLLNLHWTWVAPMFMWVYRPAFMRDMTTGGRYYSELLLLVLCAHASKYYDSSHAQLLFSRVRFLLGDEIQKPSSIPTIQALLQLSARELAQGSISQAWLYSGMAFRMSADLGLQHNGPDIADLKGLDPVDLEIRKRLFWSCYFWDKAISLY…	2217725..2220107				0	F:GO:0003677; F:GO:0003700; C:GO:0005634; P:GO:0009058; P:GO:0034641; F:GO:0043167	F:DNA binding; F:DNA-binding transcription factor activity; C:nucleus; P:biosynthetic process; P:cellular nitrogen compound metabolic process; F:ion binding			Coil (COILS); IPR001138 (SMART); IPR007219 (SMART); IPR001138 (PFAM); IPR036864 (G3DSA:4.10.240.GENE3D); IPR007219 (PFAM); mobidb-lite (MOBIDB_LITE); mobidb-lite (MOBIDB_LITE); PTHR31313:SF35 (PANTHER); PTHR31313 (PANTHER); cd12148 (CDD); IPR001138 (CDD)	F:GO:0000981; F:GO:0003677; C:GO:0005634; P:GO:0006351; P:GO:0006355; F:GO:0008270	F:DNA-binding transcription factor activity, RNA polymerase II-specific; F:DNA binding; C:nucleus; P:transcription, DNA-templated; P:regulation of transcription, DNA-templated; F:zinc ion binding
	FCIR_8_gene_22.83	related to muconate cycloisomerase I	MPAIEFANSFGSSVHHLVSGSYTNKTLFLLALDTIAKTLTQNATVPGFGLHQFVTSNAAKDRVYATAMSEPPQLFSWSVDENYQFTHIDTVNITSSSCYFSDDGNLAFSSGGSTAAIHALTENGAIGDQIQELYMLPEEEIKNVNKTRAAVLYGAHAFDINVNRKGFVPHLGMNSIFMYDIAENVTATPLSINLSPTEGDGPRNSYSSKDGKLLYVTEHNQWMDVYRVLDTRLEHIQRASAIPDDVRGVYTFRSNTVQMSRDGKYLFTSTRSWNNTEANGYVATFALNDDGLLKSEKAVAFYEAPVTLGSAGGLRVAPWQDETNCDPNGITDYMYLSDTSEGWLYILGWTPSNHTLDVVASLHYPDNSKPYEATWLD	2221621..2223069				0	F:GO:0016853	F:isomerase activity			IPR019405 (PFAM); IPR015943 (G3DSA:2.130.10.GENE3D); PTHR30344 (PANTHER); PTHR30344:SF4 (PANTHER); SSF75011 (SUPERFAMILY)	F:GO:0005515	F:protein binding
	FCIR_8_gene_23.0	uncharacterized protein FFUJ_12560	MKLSTILAFGALLLGDVSVAQDYHFRPELLENNTTWPLRGALIKAHDTPTNTTLNERCPMPRESLMGKLSSWLIGDSKHKCAQFDIAPGETLSGFPLFPTRQVHAFTFTNNSYILQAALPGSERIHEVIKKNIWIKIPGGMTVTCYEGNEGLPHCVFRT	2292105..2292584				4.29504e-75					SIGNAL_PEPTIDE (PHOBIUS); SIGNAL_PEPTIDE_N_REGION (PHOBIUS); SIGNAL_PEPTIDE_H_REGION (PHOBIUS); NON_CYTOPLASMIC_DOMAIN (PHOBIUS); SIGNAL_PEPTIDE_C_REGION (PHOBIUS); SignalP-noTM (SIGNALP_EUK)	no GO terms	no GO terms
	FCIR_8_gene_25.95	hypothetical protein FNYG_07411	MIVDEQSLAGYTKTHRVPERGNEDWMVLRSQFRANQVSVHTVLLVRAGDDSHLSSPITFFPLFDAGLALNINREGYHHEGEPKVVRVKLDDAIRFIWDLIETEVNCNKDNNDLTEI	2567963..2568313				4.91699e-53					no IPS match	no IPS match	no IPS match
	FCIR_8_gene_4.78	MFS general substrate transporter	MATTQNISRNAPSLTALDPVVIRLVHDDIDELPRPTETEIGLDTFSNKPAEPEPGVEFIEKVPSIWNPMNKMRLLAVCLASFGNGFNDAGAGAVIPYVETHYSIGYAMVSLIFVGQALGFMFAAIFLDDLRAILGRAKVFGLANIVLVCGYIPIVTTAPFPLIPITFCLVGFGAAVNIALGNLFCGGLQNGTVILGLLHGCYGFGGTISPLIATAIVSANGKVWSRFYFINLCFAVLVFSLTVWSFWGYEKELSAAIRESEKPKEQSTLHAVILTLRMKIVLLGAIFIFAYQGAEVSISGWVISFLIDTRGGSPKSIGYVTAGFWGGITIGRFALSGLGQRWGEKPFVYGFTVVAFAFQLLIWLVPNIIGSSIATAIVGLVLGPIYPYGAALFMRSMTK…	423041..424487				1.13381e-179	C:GO:0005575; P:GO:0055085	C:cellular_component; P:transmembrane transport			G3DSA:1.20.1250.20 (GENE3D); IPR011701 (PFAM); G3DSA:1.20.1250.20 (GENE3D); PTHR23514 (PANTHER); PTHR23514:SF6 (PANTHER); TRANSMEMBRANE (PHOBIUS); TRANSMEMBRANE (PHOBIUS); NON_CYTOPLASMIC_DOMAIN (PHOBIUS); TRANSMEMBRANE (PHOBIUS); TRANSMEMBRANE (PHOBIUS); NON_CYTOPLASMIC_DOMAIN (PHOBIUS); TRANSMEMBRANE (PHOBIUS); NON_CYTOPLASMIC_DOMAIN (PHOBIUS); TRANSMEMBRANE (PHOBIUS); CYTOPLASMIC_DOMAIN (PHOBI…	C:GO:0016021; P:GO:0055085	C:integral component of membrane; P:transmembrane transport
	FCIR_8_gene_5.67	hypothetical protein FVEG_07630	MEIGKDMRLDESVYVRDVVRLLRRQFPPPTEARDVGYQTQHLDCLIVLLRYINSHMTPHYLPILEEHRAQEAQNPILALSWLDINPDAKPAWIEAKRNILSALGPMGDDESNPSFGDLLHSDIMMKTFWSRQEFKLMRGIMIRPAGGSWDMPADNPDLEKNFVYVARSPLPELSFQDRISRFFQLSRRLADDSQFIRLCARPNILRVTYERQSGFQPYPFSTMKNIKIPIADVKRSKPTKGRDHDVVVYTLLAVVSHKDAMIRLYQPMAPQVLFSTTHPVIGPKRWSLEDPEHGIFDLIYAYVGHVEILDVAGEFAETRKLSEAFKEVYKQFQGDIVRFHRAREGGA	539725..540768				1.43061e-36					no IPS match	no IPS match	no IPS match
	FCIR_9_gene_21.36	---NA---	MSQIARAPADKVRLRRSRIHSDFIKPSSSRDPCPAPVAISVAGSVTGLYEKGVTVDNLIPAHHNAGQAALSVRSGRADKIAQDENERRSVTLLIKGYWIMDHQKPHL	2185309..2185632				-					no IPS match	no IPS match	no IPS match
	FCIR_9_gene_4.51	hypothetical protein FPRO05_09112	LSELSTSNRSILTPLRKTKGPISYPGRTTHNFLCLPSGFRIFTVLSRFVFQKERNNCWFVRPWTYRLGSMGPNFYTSDPRYLVKLHEHHRQNPLTANAFNDEEVLAPDEQRFYSVYGPSLTAGLRTITATQDVFLKENEKSNLFNSQTFKVVAPRFNLPTSDVHSFYPPSGGTISLKMLPHIVFKDPHLPWERQMESSTPPKDGSERTRIPWLALWVFRPDELVSPGTGIFAGKALSSTRSTRLNVSDVIQVGTSDIYTPYKHDEASPDEEHSQADFICVNRQLFEALCQSYKSDGSSTGDTDLTPYGYLAHVRKVGSEALKAAAASVTNDCFSVVIANRTGSSQNQDPSSLGAVAHLVSLEGIGPSFKPSPEAELVTICSLFSWTFNYTLQDDQVEFE…	415602..419363				0					mobidb-lite (MOBIDB_LITE); mobidb-lite (MOBIDB_LITE); mobidb-lite (MOBIDB_LITE)	no GO terms	no GO terms
	FCIR_9_gene_4.6	hypothetical protein FPRO05_09111	MPDNPPPPSPSQEDDITTIRINIRSCYLQPAGSIVPDLPDGTMSYDAQEDHWEPSPTDPKRQEFRIQGKDEFVFIAGAQYTYKPNTSLHIKCKTARFVPHPVDPNQKTVIVRMPGADAEENLLVKPGEGKRGTAASFPLESSNIVVISATEGGVGADGATGSQGTDAGSLTIEADKYDTSALTEDNVFFIADCTGGKGQQGGEGGDGGGGGGGKGVDAAGEPEGQLADKISQKLKSEGPWGPYMMNILSDSEYRELISKGFLGAKGGTAGKQGAGGYGGSGGHFTVNLPKESAGDDRLQARFGVQSNVGTPGTPGAAGKPGPGGPHGDLWLFKLPTKYTSKDKLIGDLSSEFHYMLESDAGNKWSEYLTNGTEPSPLNGDAAIALNEQEIQSRRADAGQ…	414313..415560				1.0857e-140					mobidb-lite (MOBIDB_LITE); mobidb-lite (MOBIDB_LITE); mobidb-lite (MOBIDB_LITE); mobidb-lite (MOBIDB_LITE)	no GO terms	no GO terms
	FCIR_9_gene_7.100	uncharacterized protein FPRN_12312	MSPADLPLQRPIRRHSSPIYPSPHTHTKTDLSNELKQQDSTSFVSLSPTVVDSSETWHPPLRNRGLGGGTYESTKYSIEQEKNTGKSTVYRYLGKAQESIWFIIFTIIILLSGRKRIRLFWVQTRSFGRCGMGDKVVYFLHLDSQEAFTSMAEALVPFWGGWRPIDSPGPALEESPKAGDGATEESAQTPAMCIFSPPTGESSGHRSSAVQYIHYSPVDAMHRTSTFTLISTLDATPPASGATPMIICMRGLMTVIRAAYYEATPTLPLGLISREKKKKKQPNHIWHEKES	706691..707642				3.52055e-67	C:GO:0016020; C:GO:0016021	C:membrane; C:integral component of membrane			mobidb-lite (MOBIDB_LITE); TRANSMEMBRANE (PHOBIUS); CYTOPLASMIC_DOMAIN (PHOBIUS); NON_CYTOPLASMIC_DOMAIN (PHOBIUS)	no GO terms	no GO terms
	FCIR_9_gene_9.105	---NA---	MVPKKQFYILETRKSGSHPQFCQRKSWHAHGFLGQAVAVDATMQDRPPIHVEMFMDGRERMDSREVRGVSVETRGLKMPRPEEFRDLV	983700..983971				-					no IPS match	no IPS match	No
	FCIR_10_gene_18.108	putative transcription factor	MDCGIDREVITKDIRHYLGDNASVRLGYCEGMIQKLQEDSKRWQTAKNEAKKSGEGIAGTKSDETTSVDVIQRMPETYQPPHQGLGEGSNQNEMGISPGDARQNQKRSGHKVSSAKLRPDHPDLSQESIPRSLSATTSSNTGFASSPALTTVAEAIDTAATGQAKINSGIEVSNTTAAWIFGAVAAVTNGVTALATRQTAKASKRSAIAGEVAANASKRSAKAAEETCLIAQKHFEATIKDNKDRPPSPDTSQNISGAGVVAPTGKEQESDTRSRTVVPQNTGTEASPLNAPPAVLPPGLPEPSGRGRVLRTMSNPTPGRREENYISLNRPTAKAEPIIIWPEVPTCEFGKPCNCKIIPKY	1857764..1859070				3.72808e-175	C:GO:0005575	C:cellular_component			Coil (COILS); mobidb-lite (MOBIDB_LITE); mobidb-lite (MOBIDB_LITE); mobidb-lite (MOBIDB_LITE); mobidb-lite (MOBIDB_LITE); mobidb-lite (MOBIDB_LITE); mobidb-lite (MOBIDB_LITE); mobidb-lite (MOBIDB_LITE)	no GO terms	no GO terms
	FCIR_10_gene_18.30	Putative transcriptional regulatory protein C3C7.04	MPLTVASLWPSTISNHESVLTPRSYAALYEARYRELDELCQKLQIVAAQLTKAIDSLPQGGCTDACSHVSSSASPTQRLLPQQGKVLATSGTATDSGSNGHSQPRPSDADEQNTDQSQEQVNNSGEFGTQAFGSLVHDSYGALRFVGGANNEFLLQAVDSLTLESCQGSDDSPYSVGSQHDTTKMIERPRPELPFFVHGLRWRDLPYLPKPEDVNLPPKYIADMLRVCFDLFRGLCLRIKFDRPRREPLIFPWARVLLEGSGLALRYNWSSYQVPGTVPSIDPDVLRWLEYFVNELELFWSSYKGWSRIGDALRSSTVNHGIPKKSSSVN	1830330..1831532				3.01921e-127	F:GO:0003677; F:GO:0003700; C:GO:0005634; P:GO:0009058; P:GO:0034641; F:GO:0043167	F:DNA binding; F:DNA-binding transcription factor activity; C:nucleus; P:biosynthetic process; P:cellular nitrogen compound metabolic process; F:ion binding			Coil (COILS); mobidb-lite (MOBIDB_LITE)	no GO terms	no GO terms
	FCIR_10_gene_25.32	Zn2/Cys6 DNA-binding protein	MTNNIKLEIKTRSRRSNPRQINRAEYKTTSTSDITVFRSSDSTSGLGDNIIAPSDPADSAISATEWLPSPESGSVGSLSSTPVEPQAAHTPPLDPISTTFYLDHVFSYLYPFYQPSSRRGGRSWILELLMTSSAFQQIVMSYSTYYYDLAAPQNGRTQVDKLRQAESSVTSLSQSLQTLLSVGSLDGHTHCAWRVLTSIVQHHRYETSTANSNWKIHFDAALALFTRLLDKYSNVVESLHHSSTRAGFDAIVQDLNVPRQEAFVFSVGLLIFDDIVAAASSYQEPQLFQYHQQLLGGNDPALELEVIIGVKSCILRLLGQVASLNARRQQDQAAGNLDGLESAQRASTITKSLTASLEQLQASSSPTSNPLSGERDCLEELRIHRYSRGTARDAGLVSQ…	2648133..2649882				0	F:GO:0003700; C:GO:0005634; P:GO:0009058; P:GO:0034641; F:GO:0043167	F:DNA-binding transcription factor activity; C:nucleus; P:biosynthetic process; P:cellular nitrogen compound metabolic process; F:ion binding			IPR021858 (PFAM); mobidb-lite (MOBIDB_LITE); mobidb-lite (MOBIDB_LITE); mobidb-lite (MOBIDB_LITE)	no GO terms	no GO terms
	FCIR_10_gene_25.58	predicted protein	MDLMTIARWNNGWMMEEYLWSDNPLMYRQVGVLPDRPDDNLPDLELNLATPLSTKPGENYVALNKKLAKEADDALNHGKFTVKSLNLDHDALIYGLSDVPLNATGYIDWLEQFKSAFSDLRLENQPYKQIIGQGDWTATVAMLSGTHDGNLTLPVYLSEKPILATGKRFNLLHYTIARWQNGKIVGLRVNIDYFGIVAALGIEI	2602297..2602911	FCIR_10_gene_25.59	MLPNLKLVLAFACGAKACGAHFGPSLHHMRAEIKSGNLLKRQTVSHELPTDQNNEKHWTVDQNRRQMQVSDDAFIGRDLAHFNHHENSTTYYTGGVIMNLTQHLEDMRLLYSIYLDGAPHNHNYRISFGEGDWTVALA	complement 2602987..2603461	1.42006e-94	P:GO:0019748	P:secondary metabolic process			IPR009959 (PFAM); G3DSA:3.10.450.50 (GENE3D); IPR032710 (SUPERFAMILY)	P:GO:0030638	P:polyketide metabolic process
	FCIR_10_gene_25.61	short-chain dehydrogenase/reductase SDR	MASTLVALILGAGPRVGAGVAKEFSKIGYKVALVSKSGSNSTTSEGYLSLRADLGDLNTIAGQAVDGWTTLAEGTKKAFVYTGNKINIQPLPVPATATLGMGKSASSYWISLADTLYQGKGARFFYADQRQADGNMGGMGLDGNAHGQFFVQLAQQEKDIPWLATFVPGTGYGI	2635306..2646051				6.97239e-97					PTHR43669 (PANTHER); PTHR43669:SF4 (PANTHER); SIGNAL_PEPTIDE_N_REGION (PHOBIUS); SIGNAL_PEPTIDE_C_REGION (PHOBIUS); SIGNAL_PEPTIDE_H_REGION (PHOBIUS); SIGNAL_PEPTIDE (PHOBIUS); NON_CYTOPLASMIC_DOMAIN (PHOBIUS); SignalP-noTM (SIGNALP_EUK); IPR036291 (SUPERFAMILY)	no GO terms	no GO terms
	FCIR_10_gene_5.90	hypothetical protein AU210_012760	MFKYDQGREDIVRSKYALTLLGPSTLMLQPAEHVFTTQHEAEARYYWWQDKTDGPEPSEDEMYDADDLLRESLGNAFKDTLRVQVGHGQIVRFSWGRDDSPVHSEPDLVSDRVFMTVLYGSDSELRTMSKWREAAYGEYSVE	577312..577740				2.80789e-94					no IPS match	no IPS match	no IPS match
	FCIR_11_gene_18.47	thioredoxin M-type	MPIITIHSQSEYHDLIKRHRFVILFATAIWCNPCREIKRYYEKHTHESSHCDHGELVFAEFDTDEIPELDDELGIRSIPHFFLTENADQVDKLVGPNPPTLAKLVDYCTSRLNPPSPGDF	1826234..1826596				4.33338e-49	F:GO:0016491; P:GO:0042592; P:GO:0044281	F:oxidoreductase activity; P:homeostatic process; P:small molecule metabolic process			IPR013766 (PFAM); G3DSA:3.40.30.10 (GENE3D); IPR005746 (PANTHER); PTHR10438:SF360 (PANTHER); cd02947 (CDD); IPR036249 (SUPERFAMILY)	P:GO:0006662; F:GO:0015035; P:GO:0045454	P:glycerol ether metabolic process; F:protein disulfide oxidoreductase activity; P:cell redox homeostasis
	FCIR_12_gene_1.3	Benzoate 4-monooxygenase cytochrome P450	MPLLETEQPRKSDTSLLQLRILVKDLDAAGTYLEARVLESMRMAPPVATSPLERVTLGNGIEVDGHWFSVGITSGVCFYVSNFNKTIHRYTYRFWPERWLSSKDGATNGFTAEDVQWSETNFFPFSAGDQHCPARTLASRNLKAFVANMLWHFDFRPATNLTVDESSGKEGQMRLFSIENALISIIHGPAFKFKARLGGNISSS	111441..112055				1.04763e-92	F:GO:0016491; F:GO:0043167	F:oxidoreductase activity; F:ion binding			IPR002401 (PRINTS); IPR036396 (G3DSA:1.10.630.GENE3D); IPR001128 (PFAM); PTHR24305 (PANTHER); IPR036396 (SUPERFAMILY)	F:GO:0005506; F:GO:0016705; F:GO:0020037; P:GO:0055114	F:iron ion binding; F:oxidoreductase activity, acting on paired donors, with incorporation or reduction of molecular oxygen; F:heme binding; P:oxidation-reduction process
	FCIR_12_gene_1.33	anhydro-N-acetylmuramic acid kinase	LWDCERARQEEMAYLKSRNGSLMDLWTKGGYHCGLFIVESGVVPALTDVDTVTQFRPVDHALGGNAAPLVQYLDFVSFRGDGTTVTLNIGGIANLKVADADRTKMMAFDTGPGNFMIDHVVNTRTGRGYDENVELAAKGTTILPLLEQLEQHQFFSRKPPRSAWRLDFGASYADGILEQYADSSTENLVATLTMFTATSIMRALTEFVLPRTSVTRVIASGSGVRNLTLIKFLSFELDNEGLKLESSDVYDLPAAYEEAVKFATLAFSCKTRIANNIPYAGGANKYAVLGKFTWAPSKAKHGGKVRDRNKRVLGLNGWEG	117492..119059				2.62914e-170	C:GO:0005737; P:GO:0005975; F:GO:0016301; P:GO:0034641; F:GO:0043167; P:GO:0044281; P:GO:0051186	C:cytoplasm; P:carbohydrate metabolic process; F:kinase activity; P:cellular nitrogen compound metabolic process; F:ion binding; P:small molecule metabolic process; P:cofactor metabolic process	EC:2.2.1.2	Transaldolase	IPR005338 (PFAM); G3DSA:3.30.420.40 (GENE3D); IPR005338 (PANTHER); PTHR30605:SF0 (PANTHER); SSF53067 (SUPERFAMILY)	F:GO:0005524; P:GO:0006040; P:GO:0009254; F:GO:0016773	F:ATP binding; P:amino sugar metabolic process; P:peptidoglycan turnover; F:phosphotransferase activity, alcohol group as acceptor
	1Values indicated after the 'FCIR_' are indicative of the pseudomolecule (1-12)
	No BLAST result
	Genes encoding substrate transporters and permeases
	Genes encoding for transcriptional regulators
	Genes involved in metabolism of carbohydrates, fatty acids and steroids
	Virulence factors
B	SeqName1	Description	AA sequence	Location	Multiple copy gene	AA sequence (multiple copy gene)	Location (multiple copy gene)	E-value	GO IDs	GO Names	Enzyme Codes	Enzyme Names	InterPro IDs	InterPro GO IDs	InterPro GO Names
	FFRAC_1_gene_33.89	Uncharacterised	MQTAVEYGTKLKRDEFALQGLNILQHESIEVFLILKQRQREEEEAERRRKAEHDLQQELKQKEHDQEEAYKQRKKPGQRSNQGIMSCFI	3345063..3346564				8.92349e-17					no IPS match	no IPS match	no IPS match
	FFRAC_1_gene_33.90	---NA---	MASSQPTVAAVDPPPGWPPYRSYLGQNYKWITAYNTYVNAWTTWASTDPNEDENKWKKALNHVYATKASLSRDITQAARKETETHGERYDDVC	3346565..3346834				-					no IPS match	no IPS match	no IPS match
	FFRAC_1_gene_40.33	hypothetical protein FOYG_06589	MMVVLQGILSDASALLDGTGMDSYKHVSVHGHITETVFRGFRTLMVLFCGIRIANEPRIVLHIRRRRVELEVALDDFVNCTEEVLLGCNLSPCANGIHASLSANTTQLSTRCVGAETRDELPPDVSLNGHGFSVDTQNVGTALKVGQRELDLSIDTAGSHERRIQCRGSVGGKHDLDVSTSIETVKLRNKLQHSSLNLVVSTSTIVKSSTTDGVDLVEENDACLLCTGHLEELSNHPCALADIFLNQLTTNNSDKGGVCSVGNGSGTEGLSGSRGTVEEGTLGRINTEVDESLRRQERHFDNFPQLLNLLLTTTNIAVGDIRLLLHRHHRNARIDFGWTDALAKLDNEFCDLLHVDHIFALGLVALLVSYDFRATCHLERLLFRHSLTVGGDIP	complement 4081038..4081409				6.58662e-14					mobidb-lite (MOBIDB_LITE)	no GO terms	no GO terms
	FFRAC_1_gene_57.19	uncharacterized protein Y057_7009	MGRRESCVGFLSKLEDCRTFAELSPNLDADLLIDTLLLLLDLLLELLDRCTIRRGTVRLENLNIPGAGVSGLMALSFPQEGIRTRLLEV	complement 5788323..5788708				1.19093e-53					no IPS match	no IPS match	no IPS match
	FFRAC_1_gene_58.124	lipase class 3	MSQWARDSESNLASLSLGSRRHDLVEAADPLLLPNLLPGENDEAMEQSPSAISATTSTSSTQLNLPSNQSGEANGWFKTSPQSTGPPKNTGLLALHAARLAPTAPDGQMPPRTSCMDATPNVI	5792912..5794717				0	F:GO:0003674; P:GO:0006629	F:molecular_function; P:lipid metabolic process			IPR002921 (PFAM); IPR029058 (G3DSA:3.40.50.GENE3D); PTHR21493:SF196 (PANTHER); PTHR21493 (PANTHER); cd00519 (CDD); IPR029058 (SUPERFAMILY)	P:GO:0006629	P:lipid metabolic process
	FFRAC_1_gene_58.125	uncharacterized protein FPRO_01869	MATIKFNDNYIKVNCDATAKSANLYLTDKGEELPNDGKFSTKQYSGESKKLRLTYKVPPPAPTRFNVLDAVIFPKDAQVTITGGADGTQLVMAEDKNGNKGTWGLVGVDEEE	5796859..5797874				3.14968e-169	F:GO:0043167	F:ion binding			G3DSA:1.10.1330.10 (GENE3D); G3DSA:1.10.238.10 (GENE3D); IPR018247 (PROSITE_PATTERNS); IPR011992 (SUPERFAMILY)	no GO terms	no GO terms
	FFRAC_1_gene_58.136	uncharacterized protein LW93_4671	DHKTTSLKMNPIPPPTTLDDARRQVRIRHLEQLSHANITLTPPADDEDTSLLPSCKILTKELKKWSQDHIKSIEEATLKNVLSGKENIDWNCCFLAFMESITVYLRAPTKDPVHGSRDWEKLHNAVQLYKSVKAGTSANGDLHKVHDLYEQSIEGIKEVAAVWGMEFMQICVKMIKRLCTYKLEDLTKAQQAHNDKNPKWNGPFCGAFFPKHHKQGAPYVGITFKGTDPKNIKDINVDSAFDPIQVDAKHLFGTVVSEGVYNALFGTFNDKDILSPFELILNALQDFVPKLQGEDKTEPLLHVTGHSLGGSYSSFCFAQFMMQNASLPAGARLGDLYNFGSPRVGQKAWSQAFYENLGGKFPGGAWRIVNDKDIVPQVPSLLRYKPKTGPFYHIDNGIQ…	complement 5790590..5791983				6.09765e-169					no IPS match	no IPS match	no IPS match
	FFRAC_1_gene_8.16	---NA---	MKITNSFSSLCLMCLIIGLTFIKYTAAACCPCSIYLTCGDSSGCTVYECCSTAACNIFCCNCDGPCKGGKSTDLSDEKTANLCLSKFTAVDVNQDGMITFLEWAQSRDAFASLGLDVLAERWNQYDWERKGYLTKDEAMGRRIASSKPGSDTKDTTLVQQPFDYQPRLQENLKPNELSRGAWTLQWFTDNDCSKGKHRTEGTKPKGCSNIAGANSIKFTATQGFSLYVYGRQNCGGIPRIIPSNPDCYPLNVKGLSFKVVG	802431..802712				-					no IPS match	no IPS match	no IPS match
	FFRAC_1_gene_9.73	---NA---	MAIHYTMLYKATLASLVLASSGFATVLNVNVYANAKSANAGSQQDQMVLDDKKSDAPAWKGRDERHLVPLLPEARTGVIPADVEEGLIAALGPRFANEFIKVGLESEGDMDTPTAGGCGLKCAKTLIKAMPCIIAAAKCRCKEPILKCPVKLKELCNCVPCLPEKLRKFIDKIKVCQSSTLDELSDFERAIDDSLDYGNFVSFETQDVNLLAYRGDLSKTTLEEARALAKGGYCPGQDCGDNGCCLGVCLLEDECFGQELELRDQESRRLEL	963612..963881				-					Coil (COILS); mobidb-lite (MOBIDB_LITE)	no GO terms	no GO terms
	FFRAC_2_gene_18.31	hypothetical protein FOC4_g10011613	MNTASIFEGLAKSTSYKSPATADLQSAYKHNVSEQGRTTEDDRPAEEEPLEFLVYYLFSHSIFRLARKPLIRYLRDQATIKPIRQSPSLEIITDLPSMLFGSLPLLISIWALTSYCWIPLCGLMVWERTGSDVVYECLSWILKGFGIVMNVMGRTYEGVTTMKASTVISNGSRRALQWVDGQMDDDGSLGSLLYPHYGTS	complement 1832521..1833123				9.25279e-127	C:GO:0005575	C:cellular_component			no IPS match	no IPS match	no IPS match
	FFRAC_2_gene_21.21	---NA---	MDSVTILIHVLLNFWPDPASILPLAMLFACLLGNRGSTPWLGRRARPSPAQDDRHWEPKPSLQWAS	2178647..2178847				-					mobidb-lite (MOBIDB_LITE)	no GO terms	no GO terms
	FFRAC_2_gene_37.43	---NA---	MGYGFTSSVHHDHSLGDSHHLVGIRPLGSGGGGIVLHGTARRRPITGAIIIVIATRTTISVAVTTTATTRTISTGRATPIVVVHGRRIRSTSWGAGSTALARRHIRLSLEGHVRLEILQREGASLSYVSNALDSLALKFTPIELLNSRSKVCRSLEFDEAGPC	3704902..3705496				-					no IPS match	no IPS match	no IPS match
	FFRAC_2_gene_6.39	short-chain dehydrogenase reductase family	MPCQKNQKPSSTVPSREMSPLPDFWLPVFWKNQFRTTIELPTREKYPQVQGSTAIITGSNTGLGFEASKQLLSLGLSHLVMGVRSLEKGKVAAEKLRTIAPSARIDVWQLDMQSYDSIQAFAKRCDTELAHIDFVILNAGLSPSKFELVPGTGHEVGIQVNHLSTALLTILLIPILKTKTSGHGPPRLTTVNSLTAHLCKFPNKDERPLLASFDDPKITPWDSQERYGVSKLLNQLFLVRLCEKVNPDDVIINMVDPGLTKGTHLGGHHELGGIAGALAGAFFAICGRPVDRGAASYTNAVYGHGKESHGCFLMSCEIAPLAGRFYTHGDVLVEQVWNETMEELDFAGVKGIVSGV	618080..619200				0					IPR002347 (PRINTS); G3DSA:3.40.50.720 (GENE3D); IPR002347 (PFAM); PTHR43157 (PANTHER); PTHR43157:SF11 (PANTHER); IPR016040 (SUPERFAMILY)	no GO terms	no GO terms
	FFRAC_3_gene_0.48	tetratricopeptide repeat	MRVLSCLHHQPIAPAELEALISWLRPTYDRLVSASRHRESFEILQAYSAFLESATRVGITTLDFETWSGMMHRFLSSPDLPPLFKANAMVLLADKASERLDEAYLAEIETSAKTIYIDQGHAVGLMDLRFQQVSRALKKDHQYLTDELLDELKGYFAKYQASDSMASYQTAIHAFVAHIPQWLAFELQMSLSHIRDELAHQAGAVFLTHIGRVGLISMWLAHSGKAASAVEAAEALDTTLREGDCRWLRGIAPYLASQAYSQLHDYRKAHDRAARAVEIFQETFPSDAATARNALLQAKLELYQQNNSDPKGLEEIISFADTETTRDRAAGLTLQAAQKTEMIVVQIRTLQTEQRRYWMERMLTFVNELESDSEDGDIRMAGLFQVQGMELTLPMKETD…	31325..34453				0					Coil (COILS); G3DSA:3.40.50.1460 (GENE3D); IPR024983 (PFAM)	no GO terms	no GO terms
	FFRAC_3_gene_2.93	alpha beta hydrolase	MAGTYAAELARRGVIGLAIDYRNYGQSGGAFRQREDPESKAADLSAALEFLSHRSDVAGTGLLGICTSAGNVLYPAASDPRVKAVATVAGFFPSASVAPLLHGGEDAIQLRRAQGQEAIKLYNDTQEIKLIKAYGGSANESASPGAKPYYEEETRGNIRQWRNEFAVASWEAWVGWDPVRQASLVQAPTLLVHSEKAAFPDQAREVYRNLKSQKEVVWVEGTHYDFYDNVEVVRSTADKLAKHFHTYLD	279272..280021				2.63874e-156	F:GO:0016787	F:hydrolase activity			IPR029058 (G3DSA:3.40.50.GENE3D); PTHR17630:SF61 (PANTHER); PTHR17630 (PANTHER); IPR029058 (SUPERFAMILY)	no GO terms	no GO terms
	FFRAC_3_gene_35.30	uncharacterized protein FMAN_04798	MAWFTTIVLQAFGFTPNGPLLGSLASWIQGLIGNVAPRSLFAIFQSAAMGGYGVEILGSVANMFSALTTCAFARFAYSAFGQARESGNGTYTG	3581072..3581406				7.40925e-43	P:GO:0006807; C:GO:0016020; C:GO:0016021; F:GO:0016151	P:nitrogen compound metabolic process; C:membrane; C:integral component of membrane; F:nickel cation binding			IPR009311 (PFAM); IPR009311 (PANTHER)	C:GO:0016021	C:integral component of membrane
	FFRAC_3_gene_4.125	lipase esterase	MSESITRKPGLSKIDPEWEAFEKQFPVPQLLGTPQQLRLRLKFSKTNTPPVGFSTRDVEVPGYLGATNQLRLYTPNDSSEPLPVVIYVHGGGWTIGDLDSEDNVCRTMCNSAGVIVVSVDYRKAPENPFPIGLEDTVNEQQVFNNIESLGGTSDKIIIGGLSAGGNIACAAVLAQRARNVRNIAFRGQILRVPLVVHTDAIPRELDFSSYAKNVTAPILPAAAVVQFLGYYGAPPEDIRISPLLAKDHSGLPPAYIQVAGADPLRDDGFAYAERLQKAGVPVRVSVYEGFPHAFMNFPLRSAMKSDEDLIKAIKWMLETQI	complement 437422..438699				0	F:GO:0003674; P:GO:0008150	F:molecular_function; P:biological_process			IPR029058 (G3DSA:3.40.50.GENE3D); IPR013094 (PFAM); PTHR23024 (PANTHER); PTHR23024:SF266 (PANTHER); IPR029058 (SUPERFAMILY)	P:GO:0008152; F:GO:0016787	P:metabolic process; F:hydrolase activity
	FFRAC_3_gene_4.60	Serine threonine- phosphatase 6 regulatory ankyrin repeat subunit A	MPNKSSFRLSLALLLLLVVETLANDEDTDFLMNVFSDLGPVLALFGEQFARQFLSETFTWYDHIIFACVPLGIMTAIAGAIRVEGRGVLRAFIGRARENRAAAEIDFMSSTSAEVGELFNGKGIVRTMGRSDIAQFIVFPDSFLETDEKASSENQTGTEEPEQTKERKEAQSWGIHTLKSVKGKDILSKEDYRDDLDVALLKWLKPFKLPAKSRVKEPENGGDSNTSSGAQGQNDDHEYWSSLQYPNLQLNIASKKISSKQRSIELHLAAVAAVILQVSLLAIAVVIPYRVDGYGQQQPWGLPCYIIGSVLLSIGMLCCSIAIERSTKEFKWNASNSSNNSEPSKQQVNLYWVQRKQRVSDQDFGSYIIYAQEKDFFSTSSRREDVSSNKNQDHGGNGQ…	complement 467846..476555				0	C:GO:0016020; C:GO:0016021	C:membrane; C:integral component of membrane			IPR003877 (SMART); IPR002110 (SMART); IPR020683 (G3DSA:1.25.40.GENE3D); IPR020683 (PFAM); IPR003877 (PFAM); IPR020683 (G3DSA:1.25.40.GENE3D); IPR020683 (G3DSA:1.25.40.GENE3D); IPR020683 (G3DSA:1.25.40.GENE3D); mobidb-lite (MOBIDB_LITE); mobidb-lite (MOBIDB_LITE); mobidb-lite (MOBIDB_LITE); mobidb-lite (MOBIDB_LITE); mobidb-lite (MOBIDB_LITE); PTHR24123 (PANTHER); PTHR24123:SF38 (PANTHER); IPR0021…	F:GO:0005515	F:protein binding
	FFRAC_3_gene_47.37	uncharacterized protein FPRN_05255	MLFLVSNSIIIAVLWSLSIANTLILVNPESSIPESSHHKSATSQDSHLSSSSEQWRLELLLNEQATVNPQQLILSGTIPSIGLSHETDFQILQSPTTSLPHSHSFTTVLAPNAPVAQAFTSCFDVGQSGNVLSNSSWNPNDQSGGRGPSLRSSPWSKSFLACPYYIRDPIRHFGCINLKLDTYGRVKQHLKRNHLSFDANDMEGFVCESCGMVSPDESSRDIHRVSTECAPATLANEHGLSHQAWERLEKRLKSGSTDEEKWLNMWFILFHQPFSASTPIKDTVMNRFFQIIRNFCQADGFGDILSLLFQEMHGVELGSEMQMYELLMKLLDFIRDSIQRLFDTQDAGASG	4736159..4737214				0	C:GO:0005575	C:cellular_component			no IPS match	no IPS match	no IPS match
	FFRAC_3_gene_6.78	hypothetical protein CDV56_06679	MPSEEYLASLGAYSTVVATVIGLGALLLTTQGSSAVSTASRKVRASIRPSDDQCARHRWEDIQGYELHVCTSIWTKECHEVAHSKDDTCWNQTLLNVINCWQANAFDRFVKKPEQLPLSKTFIQVDYKVLLAFILMCSTHEDRDDNVIYPKERGLYVAGVELALQELNSGILVVHLTGTLTRKLTKDYVDRLVRGHPPLLDDPLGYSITKENDEARGGWVVALGFDPEMTKERFLPVYLDCVRRRTRRGLVFWRSMDRVLDVIVNIWSKCFSGDPGSSKRINMAIKAIEYIKTNETQSGVDNIFGVKRPFVAPTESQKRKIIEHFNGPPRISEDMKAAFQAEWEPLLRYALVAAVTGCKLCIAYFKNEGRELEEALDIDRMRNSTIYMRGC	608779..609954				4.08122e-118	C:GO:0005575	C:cellular_component			no IPS match	no IPS match	no IPS match
	FFRAC_3_gene_6.98	hypothetical protein V496_09315	MKLFLENELLDAIRKNDEDLVESLLQRGANPNAGLLLGGECSLSLALRIGNERVLDHILQYGKGKFLFTNEQRVEKSEFRRKTRLMLVEWCGFKAMDLLLKSVAERFTNLANLPTFQALFDPCLWHFSPTLTAWQTLLSCIEAWRKTSEADKIVDFRSAIYSLGIYKMVLPTRPFLYMHLIPHVTVTFWRLTTVILANTKFGRHRTHQAEAAEREAREYYFQLRKDLAPMRNSLLSPDAEMERVFFDSHVGNRELRNSGYRSPATLIFKAISESDNVTESMVLKLLSHDLLVCQPCNESSLAQVLLSMAIRRGWSDLAIFLVDRGTATARRVSGVCWPSISAGYAYSLAPRLWSYLPMTTKSGPQVHAPHDQYTEGSKIDFFSDICKSQAFSEIVCELE…	complement 605510..608401				4.18986e-31	C:GO:0016020; C:GO:0016021	C:membrane; C:integral component of membrane			Coil (COILS); IPR002110 (SMART); IPR020683 (G3DSA:1.25.40.GENE3D); IPR020683 (G3DSA:1.25.40.GENE3D); PF13637 (PFAM); mobidb-lite (MOBIDB_LITE); PTHR24125 (PANTHER); IPR020683 (PROSITE_PROFILES); IPR002110 (PROSITE_PROFILES); IPR020683 (PROSITE_PROFILES); cd00204 (CDD); cd00204 (CDD); IPR020683 (SUPERFAMILY)	F:GO:0005515	F:protein binding
	FFRAC_4_gene_3.56	alpha beta hydrolase	MENTKTHILSDGRTLAYGVYGAGGDTPAQDIPTVLHFHGVPGSHHEAAAFHASAILHGIRIVAISRPGSSLSTPQPNRTLLDFPADVVALANHLNIQRFAVLGFSAGGPFALACWHCIPRTRLVGASLVASVLPASLGSEGMNTMSWTIFKVARWAPRLLAWIFDWKLGSLARDEQHPERLEQQWEADLGSNHGPDYSAWKGDEELRSALVKSLREAVRKGSSSLAWEYRLLGMNWGFELGELDVEPGQMVFWQGEKDTNVSMATLRKVASMIPEARLCVSNGDGHLSLMKQENIIANLKDMLSI	294899..295816				0	F:GO:0016787	F:hydrolase activity			IPR000073 (PFAM); IPR029058 (G3DSA:3.40.50.GENE3D); PTHR10992 (PANTHER); PTHR10992:SF941 (PANTHER); IPR029058 (SUPERFAMILY)	no GO terms	no GO terms
	FFRAC_4_gene_3.91	malate NAD-dependent	MVCGADIIVVTAGIARKPGMTRDDIFTQAAKTCPEAISCIVTNPVNSTVPVAAETLRAAGVFDPTRLFGVTTLDVVRASTFAAHALGGDADPTSIKVPVIGGHSGATILPLYSQAQPLIDLGAELTNVINRVQFGGDEIVKSKQGAGSATTCMAYAGFRFVKALLTARSGTPVVEEAYVYLPGISGGKEISTELGVDFFSVKVKLGQRGAEGLLPIGNLSDSERILLGKAVEELRVNIQTGLSFVAGK	complement 329466..330429				3.50599e-163	P:GO:0005975; F:GO:0016491; P:GO:0044281	P:carbohydrate metabolic process; F:oxidoreductase activity; P:small molecule metabolic process	EC:1.1.1.37	Malate dehydrogenase	G3DSA:3.40.50.720 (GENE3D); IPR001236 (PFAM); IPR022383 (PFAM); G3DSA:3.90.110.10 (GENE3D); PTHR11540:SF33 (PANTHER); PTHR11540 (PANTHER); IPR016040 (SUPERFAMILY); IPR015955 (SUPERFAMILY)	F:GO:0003824; P:GO:0005975; F:GO:0016491; F:GO:0016616; P:GO:0055114	F:catalytic activity; P:carbohydrate metabolic process; F:oxidoreductase activity; F:oxidoreductase activity, acting on the CH-OH group of donors, NAD or NADP as acceptor; P:oxidation-reduction process
	FFRAC_4_gene_39.39	hypothetical protein FOQG_19212	MAASDLAATSRIAFRGFSLSPWNAFYRPFASAYPQDVEKSYLREQQEALGDPSKLFTVVELQAEQVVGFSIWNYAQQQHQQRTSDSAAIDVADEKVSILTEPASSSAPQKVQFKSEALTPLPIRESKLADTAYCHTLGGHMELDNMAVDPDHFRKGYGTLL	complement 3954190..3954761				1.07624e-55	F:GO:0008080	F:N-acetyltransferase activity			G3DSA:3.40.630.30 (GENE3D); cd04301 (CDD); IPR016181 (SUPERFAMILY)	no GO terms	no GO terms
	FFRAC_4_gene_40.58	Uncharacterized protein LW93_9433	MEPSYSYQRPPKYSTEPSPPYRKIAPRPPYPNGPTPEDLNEMFRYVYLRKKRDGWRAALDDFIAKNRDYKVELLGNDGTLRIILPDACYMSMEFEDLRKIRLRLEAALLNGKLLSYWEIDVERNYKTDRGLVEAKLSIEYQERLVRDEGFRRMEATKTASIRLVEHNQRVNHSLFHG	complement 4083712..4084245				2.441e-59					mobidb-lite (MOBIDB_LITE)	no GO terms	no GO terms
	FFRAC_4_gene_43.145	cytochrome P450	MYPTGKMEHKQLAVSVLPEASIDSSTMQQPMQNVSMRIIGGFIKQNPAVDYLLKADGYQLLQASLAALFAYVLISSLTVKSTVPDGVPFPWVDTKSKSFFANWRVGKLYALNSVRQWLAQGSEKFLEKGKSYALPDFYGRRPYIIVPYHRTKLFLDRPDDATSLRHAANDIVVSDYSFPDSKIFRDHYGAQIMYRHLPRALPRLVGEIWDEVTYICDKDWGTTPGEVREISTYHKSFEMIVSLASRMLLGTACSRSEDFLANVREFSLDVFRCMALDALLPRGLTGILGPYLVSLPNRWHVNRIHKHTMPLIKKRLEDLTFNDANPDKKRAVPDDYISWHIRFAQTEKNPAALEPYYIASSMLSMQFATASSTRYALTNLFLDIFSTKPEEGVVESLRE…	complement 4319062..4321417				0	F:GO:0016491; F:GO:0043167	F:oxidoreductase activity; F:ion binding			IPR002403 (PRINTS); G3DSA:1.10.630.10 (GENE3D); IPR001128 (PFAM); PTHR24279:SF101 (PANTHER); PTHR24279 (PANTHER); IPR001128 (SUPERFAMILY)	F:GO:0004497; F:GO:0005506; F:GO:0016705; F:GO:0020037; P:GO:0055114	F:monooxygenase activity; F:iron ion binding; F:oxidoreductase activity, acting on paired donors, with incorporation or reduction of molecular oxygen; F:heme binding; P:oxidation-reduction process
	FFRAC_5_gene_17.43	histidine-rich glyco -like	MMVHEDEDSGPTSTGSGSGDAKHLPSGSASTNRLPSGRQTVYEHLPSGGVSXNRLPSGRQTVYEHLPSGGVSLNRLPSGRQTVYEHLPSGGVSLNRLPSGRQNHGHLPSGSVSMVTPLPSNVRGGNDVVMKGTEPSERPSHGHTVDSKDDDGNVGALTRESEFDEFPDSDLDGLLEADIEQLVGPALLRAPIAEADEPETRENEVDEFSDLEVEDLTEVDFQQLESQALGQAPVVDEDDGQKTRGNKVEEFLDSDSLSETDIQCLLDQAVPGSAKAVDGGDSEAPEMDADESKVGVEPIDIDAQVLDENRIDAYMSNVEDDGMECFIDEEFIPEDVREDESLAMTEGTSRAVRAEQAFYDRAWIVCDRLCQSAREEREWDSDKSPLSIGSWNWFRKAEP…	complement 1693511..1696640				1.99769e-102					Coil (COILS)	no GO terms	no GO terms
	FFRAC_5_gene_2.58	cytochrome P450	MGLPDFASRFDSSKLAPLLLIGAGLVSLLVTSLAAIAIYRIWFHPLSIFPGPKYLAITNVPERWMSNISGTWIWKVSGLHRTYGPIVRIGPNRLAIDGSIGWFQVYAMRGKDDEFPKYPEYIFPGDGLSILGANQVNHRRHRRQFWSAFNDQALVEQEIVIQPYTDMLLQRLSERAKEGKPINIVDWINFLLFDIAGELVFSQPFDCLDKQECHPWVSNFFRAVKGNAVNRFVKHYPITSPLINFLFTGKEQIQREADQRNMTFHHAMQRMKLGEQPTPGRRDFMSFLMRRNRDGGGLTDPEILVDCPVLIGASSETTTTALSGFFFYLGSSPQAYQRLVEEVRASFKAESEIDMKSTKRLEYLNATVDEALRVYPPAAESPPRISPGAEVEGKYIPKG…	complement 197208..198854				0	C:GO:0005575; F:GO:0016491; F:GO:0043167	C:cellular_component; F:oxidoreductase activity; F:ion binding			IPR002401 (PRINTS); IPR001128 (PRINTS); IPR001128 (PFAM); G3DSA:1.10.630.10 (GENE3D); PTHR24305:SF112 (PANTHER); PTHR24305 (PANTHER); IPR017972 (PROSITE_PATTERNS); IPR001128 (SUPERFAMILY)	F:GO:0005506; F:GO:0016705; F:GO:0020037; P:GO:0055114	F:iron ion binding; F:oxidoreductase activity, acting on paired donors, with incorporation or reduction of molecular oxygen; F:heme binding; P:oxidation-reduction process
	FFRAC_5_gene_34.32	---NA---	MKEAESLIGPIEIANPGIPRSITDSVSETSETVRKDQDGVWRVNGDDDVGENMANSASNADSSLPNASMQCIVQYCCEDITDKG	complement 3422590..3422844				-					mobidb-lite (MOBIDB_LITE)	no GO terms	no GO terms
	FFRAC_5_gene_4.89	P-loop containing nucleoside triphosphate hydrolase	MEDQPTMVIAVMGVTGSGKSTFVRTASGNNEVVVGHTLEACTQEITSWTFSARGHTILLVDTPGFNDTYKSDTEILLDIAKWLEVVYRQDVKLAGILYLHRITDVRMDGSAMKNLKIFRKLCGKDPMKSVVILSTFWGKVSDERAVAHEDELKANPDFWGSMIEHGARVKRFDGTKESALDVLMLFAGKAKMTLDIQRELVDEEKSLGQTAAGSAVNEELHRLEAKYSEELKRIQKETAEALAEKDTQYEKILEAERTKTEQRLERIYSDQVALRQERQEEMRRIVADNQRQIGLLQKGEGGERSKLGSRFVQLVASGTAAAVTPLAIPVALASLANFMSSAGKVVLEKKGYKKG	complement 390580..391711				2.10383e-160	F:GO:0005525; C:GO:0016020; C:GO:0016021	F:GTP binding; C:membrane; C:integral component of membrane			Coil (COILS); IPR006073 (PFAM); G3DSA:3.40.50.300 (GENE3D); cd00882 (CDD); IPR027417 (SUPERFAMILY)	F:GO:0005525	F:GTP binding
	FFRAC_5_gene_47.110	subtilisin-like serine protease	MLSFLKQLAITACVPLLVTASYPIAVIVEFDGTSHWKEDAEGLTRVAAVSLRNVDLACTVSRRYAYNHWSFRGASLSIDCNTDVIPTKSIVTTIRSIEGVENVWPITTEKPPSRSPRGTSMSNTELFHRRYEQNNHGRGLTLNNNLNYRSEADSDTLSTHIDTGVARLRAENITGAGIRVAVLDGGFDLTVSGLSLTSVDYTHDMINGGNDVQDECWFHGTHVLGIIGAKGNGAEHNVSGVAPDATYELFRIQPCDSSSATEDARLASLIDAADRGVDIITCSYGSPGAWPEGKTESYRGLMTAQANWITDPWTSVADRIAANGTLVFFPAGNRGPGIFTGNSPADGDYVTAVGSVDNSVTPYYSWEATWSTVNSSAAGSFSIVPSSPFNFPNNTKLTV…	complement 4744659..4747508				0	C:GO:0005618; F:GO:0008233	C:cell wall; F:peptidase activity	EC:3.4.21	Acting on peptide bonds (peptidases)	IPR015500 (PRINTS); IPR000209 (PFAM); IPR000209 (G3DSA:3.40.50.GENE3D); IPR010435 (PFAM); G3DSA:2.60.40.1710 (GENE3D); PTHR43806:SF17 (PANTHER); PTHR43806 (PANTHER); IPR023828 (PROSITE_PATTERNS); IPR000209 (SUPERFAMILY)	F:GO:0004252; C:GO:0005618; P:GO:0006508; C:GO:0016020	F:serine-type endopeptidase activity; C:cell wall; P:proteolysis; C:membrane
	FFRAC_5_gene_47.129	hypothetical protein FOVG_07070	RMKRLSRSDPDYKEHENKFYHSWRHDEKSAKIKSIYLANNYDIGQSYRGQRFVAYLNGARYKRLYHGTSRACHIGESGNDLRLCYNDDCGTCSILRQSFKLKHADGEGMFGPGIYSTPTSSKADVYVKNHHVSSNLHAMLICYVVANKPQRKLLADHDITRPSRGYNCVEGVTIENGGSLLYPEFVVYREDAIVPVGLIMYTRKGWEPS	4734648..4735537				4.33842e-132	F:GO:0016757	F:transferase activity, transferring glycosyl groups	EC:2.4.2.30	NAD(+) ADP-ribosyltransferase	G3DSA:3.90.228.10 (GENE3D); IPR012317 (PFAM); PTHR31681 (PANTHER); IPR012317 (PROSITE_PROFILES); SSF56399 (SUPERFAMILY)	F:GO:0003950	F:NAD+ ADP-ribosyltransferase activity
	FFRAC_6_gene_1.25	hypothetical protein FOC1_g10006220	MAIVDTPDAPEPPSTTQYLTMVKAPTGYTPESGCQLLRPGAQGAIREFVKKAYQDYVLGCPQPWYLSTLIQVNVFSALVQNGVTLGFSDHWQRKGVMSPFSILGPLQSHDSYPLNLQPTALQRTVPHHPWIDLYPIPQMRDNILLSLHRLDMDELCGDLLDVKPGLDGKPSLIVWGDPWDLHGWEASPLFLQKWGWMLEGCRDILHATNYWRESRGEDKISF	166272..166940				1.00175e-141					IPR021833 (PFAM); PTHR38116 (PANTHER)	no GO terms	no GO terms
	FFRAC_6_gene_1.44	related to alcohol dehydrogenase	MSLPQKSTQWVVKRFDGPSGLEMQVAPIPHLGPNDVMIKIHAISLNYHDVGTLRGHFKHSLKDGVPVSDGSGVILAVGSDVQSFQIGDRVTTVMNGAHQSGPIKPHYMNALLGNACHGVLQDFVEGSTLPVAGLTAWNALFGAQGRPLLPGQWVLTQGTGGVSTFAILFAKAAGAKVIATTSSAEKAERLRDMGADHVINYREVESWGAQAQALTPGAEGVDVVVEIGGGATLKQSLVAVKMDGLISVVGVRAGAHPQEQPVLMDMFFRFCTTRIAYVGPRVQFEEMNRAIEANSIKPVIDGRVFSLEEARDAFEYLESMRHFGKVCIEVVKGV	complement 164227..165527				0	F:GO:0016491; F:GO:0043167	F:oxidoreductase activity; F:ion binding			IPR020843 (SMART); IPR013154 (PFAM); IPR013149 (PFAM); G3DSA:3.90.180.10 (GENE3D); PTHR11695 (PANTHER); PTHR11695:SF636 (PANTHER); cd08276 (CDD); IPR016040 (SUPERFAMILY); IPR011032 (SUPERFAMILY)	F:GO:0016491; P:GO:0055114	F:oxidoreductase activity; P:oxidation-reduction process
	FFRAC_6_gene_2.15	glycoside hydrolase	LHFRGSMAFAVAVEDTTTIKSVEFFVDDKSVYTDSDYPWGLLWNTRELDPGTYRLKAVVKNSCDGSASITQDINVKAPLIKAEANGSVITSGLLPEISPSIEGINLRDTTVTLGPNGTYYLSGTGADNDAWVHNEGINLWKSTDLKTWSYVGLVWSFERDGSEDEKTWWWYKDEHLFRAVWAPEFQYLNGNFYIVYSLQSKGSKLLVSTTRKPEGPYKVAGGEDTILFNNIDGSLFTSITDPRSGYLCYENGNVVKMNSGWNATVGDVTRMNVGDEGCFVFQWKDKYYMSVAKFMAAGGRYSSYVGIASHPLGPYSQFHEAIPCGGHNTFFKDKCGTLWGTFFGNDKEAPWREKPAIVKMAIRSDGTLYPDENQDVMGC	complement 258260..259454				0	P:GO:0005975; F:GO:0016798	P:carbohydrate metabolic process; F:hydrolase activity, acting on glycosyl bonds			IPR006710 (PFAM); IPR023296 (G3DSA:2.115.10.GENE3D); IPR013783 (G3DSA:2.60.40.GENE3D); PTHR42812 (PANTHER); PTHR42812:SF5 (PANTHER); IPR023296 (SUPERFAMILY)	F:GO:0004553; P:GO:0005975	F:hydrolase activity, hydrolyzing O-glycosyl compounds; P:carbohydrate metabolic process
	FFRAC_6_gene_2.34	Transcriptional activator	MVMLENLLVQNVFEKAPNVFLQIPEEGVIILIIVAHVKLPKAIEAKKTVQTREGNVHDKLQNPSDALLVLAHAAGQPEDEHGLDADLHASNEYESQANGTEASRSAIMMQIAHPGHLQLGMASEATVNDYALVKNGTLDPIILIQLLRQYAESFHCFFPIVPKNVLKPECILDTIKTETFLLTAILIIASKDRPDLTATHKSIWEYMRGLILNVVLGKASVRKVGTVEGLLLMGEWTLHNRTQVDDGDEAAAWSIVGLAVRLAYLLRLEDSGFKGEDVELDSVHRERLAWTFTYLSDRQISIRMGQAFWCRGPALSARFTARDFPALQPRRSHDDDFASFIQAQVELTTLFGNAHDILFASRSRTAELMMRGDYTKYIDDATKAMYSWQHAWASLSVSP…	264987..267178				0	F:GO:0003677; F:GO:0003700; F:GO:0003700; C:GO:0005634; P:GO:0009058; F:GO:0016491; P:GO:0034641; F:GO:0043167	F:DNA binding; F:DNA-binding transcription factor activity; F:DNA-binding transcription factor activity; C:nucleus; P:biosynthetic process; F:oxidoreductase activity; P:cellular nitrogen compound metabolic process; F:ion binding			IPR007219 (SMART); IPR007219 (PFAM); PTHR31644:SF4 (PANTHER); PTHR31644 (PANTHER); cd12148 (CDD)	F:GO:0003677; C:GO:0005634; P:GO:0006351; F:GO:0008270	F:DNA binding; C:nucleus; P:transcription, DNA-templated; F:zinc ion binding
	FFRAC_6_gene_2.49	Lactose permease	MSTKAAGTARHDRNVGDVAAASEVSRLLAEDKTPWHQKKNLRRLYGLLVPAGLGVEITTGFDGSVLNGLQAIDKWQSHFGHPEKATLGLISASMAIGSVAAVPIIPYLNDRWGRKMSVILGSLIVTIGVIVQTASINIGMLIASRVIMGFGLTICLSGAAQLLTELCYPKERAVIIGCFQVSWYVGSILAAGLTLGTYNWTSDWSWRLPTIFQIVPSLLQLGFVWFVPESPRWLISRDRHEEALAILVEYHGEGDPNSAFVAAEFRQISETLRLEKEASTRPWRELFTTRTNLRRVAVALCVGLFSQWAGNGLVSYYLAKVLATVGITSRLRQQQINLSLSCWNLLTGAAAANFGTDFFPRRTQLLIGFGSMCAIFACWTGASAVFAGDETNNSAAIAV…	complement 255634..257322				0	F:GO:0003723; C:GO:0005575; P:GO:0005975; P:GO:0006464; F:GO:0016301; F:GO:0016798; F:GO:0022857; F:GO:0043167	F:RNA binding; C:cellular_component; P:carbohydrate metabolic process; P:cellular protein modification process; F:kinase activity; F:hydrolase activity, acting on glycosyl bonds; F:transmembrane transporter activity; F:ion binding			G3DSA:1.20.1250.20 (GENE3D); G3DSA:1.20.1250.20 (GENE3D); IPR005828 (PFAM); PTHR23500 (PANTHER); PTHR23500:SF208 (PANTHER); IPR020846 (PROSITE_PROFILES); IPR020846 (CDD); IPR020846 (SUPERFAMILY)	C:GO:0016021; F:GO:0022857; P:GO:0055085	C:integral component of membrane; F:transmembrane transporter activity; P:transmembrane transport
	FFRAC_6_gene_2.52	phytanoyl- hydroxylase	MAPSRTEILPAGEPATLSADKSKVLSEAPQDPYGHYFPAHPATLSLESNYGPMEPDTIGYLQPTTKDTPIEVMRERFERDGYLFVSISINVKGCIKRETSLDCRRDYFTHMAPSGLLQEGSHPVDGVYSGADTRKYLPPSNLRRLFGLKDDPDSERYVDLMISAHEASFYAEFCKNKQLHDFVRMFTGWKNPQMLQRTMLRAFVPNGELTPVHFDQMYLRAGPPTSLTAWIPIGDVSLEGGGLIYLQGSTDIGKKTEDDFAKKAYNLTDEERVSAFNKNMNDGGFLSRDTVAYGKEKQRKWLVAEYEAGDVIFHNPYMVHASCKNLDPRNKIRLATDVRFVDPEKPYDTRWMKVYRPLDGL	complement 263148..264338				0	F:GO:0003674; C:GO:0005575; P:GO:0008150	F:molecular_function; C:cellular_component; P:biological_process			IPR008775 (PFAM); G3DSA:2.60.120.620 (GENE3D); mobidb-lite (MOBIDB_LITE); PTHR40128 (PANTHER); SSF51197 (SUPERFAMILY)	no GO terms	no GO terms
	FFRAC_6_gene_3.57	amidohydrolase 2	MTGTIAIEEAIINPKYLYTVEKYIPLLSHYANLGSSVKDGLLDIHEKRLDSMNKHGVEYMVLSITSPGSQDEADPALAEKMAYDNNNFLAAEVKKNPRRFGAFAALSMHNVHQAVAELKRAVQDLGFHGVLLNDWQTTKAEDGSEIRKYYDTPEYDPFWAAIQELDVPVYLHPRYPLPETLTEPWESRSHLLGASVGFSLDLSFHLYAISSSGTLDRFPNVKIISGHLGEGIPFNLWRASYWYDHMRGTSARRSQHNYAYYWRKNFYVTTAGTYTTPGLKLAIGELGIDRCLYSIDTPYNNIEEAQSWWKDVDLTPTDKALVGRDNAIKLLKLTLELQSSQN	complement 295308..296485				1.30844e-131	F:GO:0016787	F:hydrolase activity			IPR006680 (PFAM); G3DSA:3.20.20.140 (GENE3D); PTHR21240 (PANTHER); IPR032466 (SUPERFAMILY)	F:GO:0016787	F:hydrolase activity
	FFRAC_6_gene_41.37	---NA---	MDGIEEPSAKTPALSWAPSYEAQRKAWANKFMASYYTPLASDQTIFGLYLSECMKTYVSIPEAKQLFEIISKSPIGEISDIGIVDLRDTSYKTKIKTAIGMPFQDAPEVEAMKESKDSKA	complement 4178410..4178772				-					no IPS match	no IPS match	no IPS match
	FFRAC_6_gene_41.88	Sphingoid long-chain base transporter RSB1	MATFDRNLCTLATCSVEKFGWYHYVPNLGANAFYLAVFAIFAIIQLYLAIRYRVWGTFALGLVLGCVTEAIGYAGRVIQARGDGIFKKKYFVIQLVCLTIAPALISAPIYLSLGRVVKAYGRQFSLMSPRTYAVIFICSDVVSLILQAMGGGLAATGKTQKKVDTGVHILVAGLAYQVLSLAVFIGLATHLWSRVRRMGTKDANPRFTELRGSRQLKLFIWALSIATITITIRCIYRVVELSGGFKSEAANDEPSLMVLDGPMIMAALLALTVCHPGPLFFGDWKRLGQDSGYPETGEEIEQVKQDVERK	complement 4113312..4114351				0	C:GO:0005575; P:GO:0006950	C:cellular_component; P:response to stress			IPR007568 (PFAM); PTHR31465 (PANTHER); PTHR31465:SF24 (PANTHER)	P:GO:0006950; C:GO:0016021	P:response to stress; C:integral component of membrane
	FFRAC_6_gene_41.95	hypothetical protein FVEG_13027	MSKTEMTITVSWSGGGQIKAEILSGFSFGSNVQVKKGATDKDQSAGNESDEKEEFENDKTDEEKTFSFMEDEKNEFSTYEARKKFEGFWVGLPVGGASGDFFNDGRHVAGVVDRAGYPVLIEIQMIPHQDNATLVGWIKTHYKYFCLTSGNLD	complement 4180236..4181357				5.17722e-05					Coil (COILS); mobidb-lite (MOBIDB_LITE)	no GO terms	no GO terms
	FFRAC_7_gene_1.69	C6 zinc finger domain-containing	MERARRETVIIPRGVHISAEVHSWNRFYQDYAMHSGITLFNVLPRFYTSSSSTCFQEALHAVALVSSARQLQQSGLMMLARRHYGGAITALNVALDDTVLTADDSVLVALLLLSLFEMIAPECFRKDADFQCHIHFRGALLLLRWRTERARNSELDESCFMFLSHICLMSMFLNNEPFDVKWLALERFAAPWKKGPLLEPILGRVVDFKRRACAQATIVHHSSRIEVIQLIKDGIAICEDLDATATSVKSSSNPDLPSHQQPTAFNNMFEVSTKTTEAIARSLYQTVRYHVVELVSSLVAFVEEGGGTRQELEYQFNPSMRYMVLEQTGQELLTEHMVYFGLYLSYYFLRR	complement 162700..163963				0	F:GO:0003700; F:GO:0003700; C:GO:0005634; P:GO:0009058; P:GO:0034641; F:GO:0043167	F:DNA-binding transcription factor activity; F:DNA-binding transcription factor activity; C:nucleus; P:biosynthetic process; P:cellular nitrogen compound metabolic process; F:ion binding			IPR021858 (PFAM); PTHR38791 (PANTHER)	no GO terms	no GO terms
	FFRAC_7_gene_27.77	hypothetical protein FVEG_17053	KFQIAKTNDLAEIGGRGVVLGIGASCGHWLCHGNAVLWPPRRFRCSRLNSGNWDKKWCRGAVKTPLNYVSIVQEVVKSWMFYLWMMLVSWPDIVHGQDGSLFQGKGSGLAVIQHTEILAEQWYCSSREALDWPRI	2726808..2727238				2.31057e-16					no IPS match	no IPS match	no IPS match
	FFRAC_7_gene_3.36	Uncharacterized protein LW93_5114	MAEHPVLAEGPDMNQDTNQSNPTLVGRREINKSQSSHHERLARRTKPELIAEAKRIKIEHDILMSENNSRLRRPVDLRHPANSKPCANCGGEGHQLADCITTVNGYIKTCVFCEADSHRTDDCDSFKNLSLADKAKLLVTDRAGKPALAQWWTLLYEFLEAKETRTSLQQRASPRRSNLQ	376711..377253				7.75794e-60	F:GO:0003674	F:molecular_function			IPR001878 (SMART); IPR001878 (G3DSA:4.10.60.GENE3D); mobidb-lite (MOBIDB_LITE); IPR001878 (PROSITE_PROFILES); IPR001878 (SUPERFAMILY)	F:GO:0003676; F:GO:0008270	F:nucleic acid binding; F:zinc ion binding
	FFRAC_7_gene_4.21	uncharacterized protein FFUJ_09045	MQKSSQTNAAESPASANGGTVDIEYIVNIAYDSSASPTPGESRALAPSLPPGMAESLGLEPPTALSGRALVTRLASLDKSLNCKEEEVAFAYGALDGAKARCDQLAVDIEKLKAEKAQVEREKQIAETKNEALEAEVRHQKEVIERIREVLQSHRLS	complement 408473..409219				1.3306e-09					Coil (COILS); G3DSA:1.20.1170.10 (GENE3D); mobidb-lite (MOBIDB_LITE)	no GO terms	no GO terms
	FFRAC_7_gene_4.61	uncharacterized protein FPRN_09976	MAPTRQEDEQHNRKGYAERVARKPKSAQSGSGRGTIRPHKNRDSSRYAHTMAERHGITKAQSRYQTEEDDDRLVTVKEEEGRHDNGAGHLTDVSGQRQNNSMAYDKDGNTQVSSTKSVKPEHTTQAAQAARAVEALFGPPTPIPAYKSYDSDRMAIAKAKRHRYDVAMSTSTVIPSTVTPLRPPRERITAPYEARNPCPQGENVNQAAQAVRAAQALFRTPTLTPAPMSYRPNRAHAKAQAKAKKARYDALMSAGVVRPTRMLDQEVPRQDGSRPSACNSRLSNDMSEEE	complement 401528..402400				6.98125e-43	F:GO:0003676; F:GO:0008270	F:nucleic acid binding; F:zinc ion binding			mobidb-lite (MOBIDB_LITE); mobidb-lite (MOBIDB_LITE); mobidb-lite (MOBIDB_LITE)	no GO terms	no GO terms
	FFRAC_8_gene_1.84	uncharacterized protein FMAN_10938	MTVPEAHSIMMQLQELEFPYAFMKARTISLLKAGGIPTMSKLFAVTGQNNARNGGKRVVDTEILIREVQHNSRLSSRYQTAVARMNYLHSRYRQAGKILDEDLLHTLGSSVVEIFRIFESEEWRPLSNVEKCAVGVVHMALGHDMEIPFKSLPSSSTGWTDGIHFATELRDWTLRYEENVALPTEANDRYVRVYVDGLFPRLIPRLTTLLRKIIGFELGDVMRESLGIESTGPVLSLVLLGFKTLRRLALRHFSLPRPAFLASKAIAESPNPDTGLYNLTHFSAEPWYTKPSWWTTHGPSAQIIRVLGGKLPESVSGKFKPQGYDLTKIGPQPQEGKGMDSMAATISGLESQDLTTCPFKSFKS	117902..119121				0	C:GO:0005575	C:cellular_component			PTHR36124:SF3 (PANTHER); PTHR36124 (PANTHER)	no GO terms	no GO terms
	FFRAC_8_gene_1.98	phytanoyl- dioxygenase family	MESMPEAPNSVIINRETGAAKRLGEKVPVTRHLQKLIDETLSNGYVIIPNAFTNAEIEEANAELRRLASGPEAGPAVSGGRNRFEGLRTNRIYALLNKSRVFDKFVLHPDILGLNEYFLDQGFLLNAFHSINIQPGEAAQTIHHDDGFITISRPHRPFGTAIMVALDSYTETNGATVVVPKSHTWDSSHVPTPEEAQPVIMEKGSVVYFLGTLWHGGGKNVSDKERRALTVQYCQPWIRPLENQILAVDWEKLNDIPPRLVDMLGYQVGAPFVGYVDGISPRRAVERKMREKHAVDGYNTKL	complement 115842..116796				0	F:GO:0016491	F:oxidoreductase activity			G3DSA:2.60.120.620 (GENE3D); IPR008775 (PFAM); PTHR20883 (PANTHER); PTHR20883:SF23 (PANTHER); SSF51197 (SUPERFAMILY)	no GO terms	no GO terms
	FFRAC_8_gene_21.114	related to short-chain alcohol dehydrogenase	MAPPRAFDFSGDVAIVTGAGSRMDGEIGNGRAAAILLARHGAKVALVDFNVDWAKETKRMIDEESGISEVIQADVTSEESCKNAIDKTVELWGALHILVNIVGVGGAMGDATSINLDAWDRDFRINVTSMVMMSRYAIPEMRKQGRGSIINMSSVSGLLGGNPSLLYPTTKGAIIQMTRAMAAHHGRENIRVNCVAPGMVYTPMTRGRGMTDEMRQARINQNLMKKEGTGWDVGHAILFLASKEAGWITGLIMPVDGGTTAGKADRPALKADTLAEANTGIQN	2139159..2140285				0	F:GO:0016491	F:oxidoreductase activity			IPR002347 (PRINTS); IPR002347 (PRINTS); G3DSA:3.40.50.720 (GENE3D); PF13561 (PFAM); PTHR24322 (PANTHER); PTHR24322:SF699 (PANTHER); IPR020904 (PROSITE_PATTERNS); cd05233 (CDD); IPR016040 (SUPERFAMILY)	F:GO:0016491	F:oxidoreductase activity
	FFRAC_8_gene_21.125	Nitrogen assimilation transcription factor nit-4	METNDEQGQGQSSARSKKQRMSRKYRGLTCANCRAKKVRCEGSQPTCKTCEVYHVECRYDKPPPLSQVVAMARKLQEAEETIERLQGGEGTINHQNMRSSIPETVAPASSSFVPEDLSTQVPLSSGPNIEPVVLEESPATNHSRLRDPPRPAAAIDGNPQDGLAIDLSVDEHGKICYYGPTSAVHEPLGLASPSTNSMSRGDGSKRTDVRAYLVSRARESTIWEEFALGNASLQLGLPRQVMTKLLHLHWTWVAPMFMWVYRPAFMRDMTTGGRYYSELLLLVLCAHASKYYDSSHAQLLFSRVRFLLGDEIQKPSSIPTIQALLQLSARELAQGSISQAWLYSGMAFRMSADLGLQHNGPDIADLKGLDPVDLEIRKRLFWSCYFWDKAISLYTGRLP…	complement 2410526..2142920				0	F:GO:0003677; F:GO:0003700; F:GO:0003700; C:GO:0005634; P:GO:0009058; P:GO:0034641; F:GO:0043167	F:DNA binding; F:DNA-binding transcription factor activity; F:DNA-binding transcription factor activity; C:nucleus; P:biosynthetic process; P:cellular nitrogen compound metabolic process; F:ion binding			Coil (COILS); IPR007219 (SMART); IPR001138 (SMART); IPR001138 (PFAM); IPR007219 (PFAM); IPR001138 (G3DSA:4.10.240.GENE3D); mobidb-lite (MOBIDB_LITE); mobidb-lite (MOBIDB_LITE); PTHR31313 (PANTHER); PTHR31313:SF51 (PANTHER); IPR001138 (PROSITE_PATTERNS); IPR001138 (PROSITE_PROFILES); cd12148 (CDD); IPR001138 (CDD); IPR001138 (SUPERFAMILY)	F:GO:0000981; F:GO:0003677; C:GO:0005634; P:GO:0006351; P:GO:0006355; F:GO:0008270	F:DNA-binding transcription factor activity, RNA polymerase II-specific; F:DNA binding; C:nucleus; P:transcription, DNA-templated; P:regulation of transcription, DNA-templated; F:zinc ion binding
	FFRAC_8_gene_21.126	related to muconate cycloisomerase I	MPAIEFANSFGSSVHHLVSGSYTNKTLFLLAFDTIAKTLTLNATVPGFGLHQFVTSNAAKDRVYATAMTEPPQLFSWSVDENYQFTHLDTVNITSSSCYFSDDGNLAFSSGGSTAAIHALTENGAIGDQIQELYMVPEEEIKNVNKTRAAVKFKLYGAHAFDINVNRKGFVPHLGMNSIFMYDITENGTATALSINLSPTEGDGPRNSYSSKDGKLLYVMTEHNQWMDVYRVLDTRLEHIQRASAIPDDVRGVYTFRSNTVQMSRDGKYLFTSTRSWNNTEANGYVAAFALNDDGLLKSQKAVAFYEAPVTLGSAGGLRVAAWQDETNCDPNGITDYMYLSDTSEGWMFILGWTPSNHTLDVVASLHYPDNSTPYEATWLD	complement 2144467..2145913				0	F:GO:0016853	F:isomerase activity			IPR019405 (PFAM); IPR015943 (G3DSA:2.130.10.GENE3D); PTHR30344 (PANTHER); PTHR30344:SF8 (PANTHER); SSF75011 (SUPERFAMILY)	F:GO:0005515	F:protein binding
	FFRAC_8_gene_21.86	related to dienelactone hydrolase	MGQSSSQQAASEPYLAKPSGSCCLKGTIHEGESRGTWETIADVETYISKPAAEKANGNILLYFPDVWGMFPNGLLVMDAFADAGYLVLGLDYFRGDPVWKHRKDRHTQNPDFDYEAWKRKHTAFADVAVPKWVAAVKKSYGTNTTKFACVGYCFGAPYVCNELKGDTVTVGAFAHPAFLKEHHFTDLKKPLFLSCSEVDHTFDVPSRRRALDILQTNKKIFHYQVFSGVEHGFALRGDPKDPYQRWVKEQSLVGIVAWFDYWLSQ	2137477..2138428				0	F:GO:0003674	F:molecular_function			IPR029058 (G3DSA:3.40.50.GENE3D); IPR002925 (PFAM); PTHR17630 (PANTHER); PTHR17630:SF64 (PANTHER); IPR029058 (SUPERFAMILY)	F:GO:0016787	F:hydrolase activity
	FFRAC_8_gene_21.93	DAL5-allantoate and ureidosuccinate permease	MSDTPKPIVESPPSIEAIEDSELKGGRTEMDVQDRENAVGYSEYLEARYIEFSDAEAKKLRWKLDLVILPMFLVTQALQFMDKTSLNYANLFGYQEALGLKGNQFNYLSAMVYAGYFFGQYPCGWLIGRFPAQKVMAISVFLWGLMVIIMTQSRDYSSALAVRFIMGVFEAAVTPGLTLMTGFWYTRREIPLRQCIWYSSLGWGGIVSYSHVGSYISMGVSKLPVDLKPERWELIFFILGGATCLWAFVIWFLLPDSPSNARFLNHRERLIAVKRVASNETGIKNKAFDKDQVVLGFTDPKTLLLCTSVFAAAIPNGVVNSFSTIIIRDMGFSTTRTTQLKSVGDAVQIIGLIIGGSIILNVPNSRLLTATVANMLCTISAACMAYLPRDNTWGRLVCF…	complement 2135056..2137026				0	C:GO:0005575; P:GO:0055085	C:cellular_component; P:transmembrane transport			G3DSA:1.20.1250.20 (GENE3D); G3DSA:1.20.1250.20 (GENE3D); IPR011701 (PFAM); PTHR43791 (PANTHER); PTHR43791:SF42 (PANTHER); IPR020846 (PROSITE_PROFILES); IPR020846 (CDD); IPR020846 (SUPERFAMILY)	C:GO:0016021; P:GO:0055085	C:integral component of membrane; P:transmembrane transport
	FFRAC_8_gene_22.21	uncharacterized protein FFUJ_12560	MKLSTILAFGALLLGDVSVAQDYQFRPELLENNTTWPLRGALIKAPDTPTNTTLNERCPMPRESLMGKLSTWLIGDSKHKCAQFDIAPGETLSGFPLFPTRQVHAFTFTNNSYFLHAALPGSERIHEVMKKNIWVKIPGGMTVTCYEGNEGLPHCVFRT	2215674..2216153				2.34641e-75					no IPS match	no IPS match	no IPS match
	FFRAC_8_gene_29.111	uncharacterized protein FMAN_16248	MIVDEHSLAGYTKTHHVIERENEDWMALRSQFHANQVSGHTVLLVWTGDDSHLSSPITFLPPFDASLTLNFNREDYQDEKEPKVVRVKIDNAIRYIWDLLITEVNCNKKNSDLTGNLRQEQDMHCQAWVSKVVEHAQEVGIDANGYFW	complement 2913592..2914038				4.89231e-68					no IPS match	no IPS match	no IPS match
	FFRAC_8_gene_3.126	MFS efflux	MATTQNISGNAPSLTVLDPVVIRLVHDDIEELPRPTETEIGLHTFSDKPAEPEPGVEFIERVPSIWDPMNKMRLFAVCLASFGNGFNDAGAGAVIPYVETHYSIGYAMVSLIFVGQALGFMFAAIFLDDLRAILGRAKVFGLANIILVCGYIPIVTTAPFPLIPVAFCLVGFGAAVNIALGNLFCGGLQNGTVILGLLHGCYGFGGTISPLIATAIVSANGTAWSRFYFINLCFAVLVFSLTVWSFWGYEKELSAAIRESEKPKEQSTLHAVLLTLRMKIVLLGAIFIFAYQGAEVSISGWVISFLIDTRGGSPKSIGYVTAGFWGGITIGRFALSGFGQRWGEKPFVYGFTVVAFAFQLLIWLVPNIIGSSIATAIVGLVLGPIYPYGAALFMRSMTK…	complement 307136..308609				1.32812e-179	C:GO:0005575	C:cellular_component			G3DSA:1.20.1250.20 (GENE3D); G3DSA:1.20.1250.20 (GENE3D); IPR011701 (PFAM); PTHR23514:SF15 (PANTHER); PTHR23514 (PANTHER); IPR020846 (PROSITE_PROFILES); IPR020846 (CDD); IPR020846 (SUPERFAMILY)	C:GO:0016021; P:GO:0055085	C:integral component of membrane; P:transmembrane transport
	FFRAC_8_gene_4.43	hypothetical protein FVEG_07630	MEIGKDMRHDESVYVRDMVRLLRRQFPPPTEARDVGYQTQHLDCLIVLLRYINSHMTPHYLPILEEHRAQEAQNPILALSWLDINPDAKPAWIEAKRNILSALGPMGDDESNPSFGDLLHSDIMMKTFWSRQEFKLMRGIMIKPAGGSWDMPADNPDLEKNFLYVASSRFPELSFQDRISSFFQLSRRLADDSQFIRLCARPNILRVTYERQSGFPPYPFSTMKNIKIPIADVKNSKPTKERDHDVVVYTLLAVVSHKDAMIRLYQPMAPQLLFNTTHPVIGPKGWSLEDPEDGTFDLIYAYVGHVEILDVAGEFAETRELPEAFKEVYKQFQEDIVRFHRAREGGA	complement 473827..474870				4.33549e-36					no IPS match	no IPS match	no IPS match
	FFRAC_9_gene_21.74	---NA---	MSQTARAPADKVRLRRSRIHSDFIKPSSSRDPCPAPSLSLAAISVAGSVTGLYEKGVTVDNFIPAHHNAGQAALSVRSGRTDKIAQDKNERRSVTLLIKGYWIMDHQKPHL	2168014..2168349				-					no IPS match	no IPS match	no IPS match
	FFRAC_9_gene_3.24	uncharacterized protein FPRO_12782	MGPSFHTSDPRYLVKLHEHHRQNPLTAKAFNDEEVLAPDEQRFYSVYEPSLTAGQRTIAATQDVVDPEGNTFTLSNSQIFKVVAPRFNLPQSDVHSFYPPSGGTVSLKMLPHIVFKDPHLPWERQIGSSAPPKDGSERTRVPWLALWVFRPEELVSSGTGIFAGKALSSTRATRLKVSDVIQAGSSDICTPYKYDEASPDEEDSQADFICVNRQLFQALCQSYNSDGSSTGDTDLTSYGYLAHVRKVGSEALKAAAASVTDDCFSVVIANRTGSSQNQDPSSLGAVAHLVSLEGIDPSFKPSSDDELVTICSLFSWTFNYTLQDDQVEFENALKAIGKPTSGLEWLRPSEDRYAGLLSAQEVEKQRVGKRIREGYSLTRYRTISGEETLALQRGALIPS…	373540..376839				0					mobidb-lite (MOBIDB_LITE)	no GO terms	no GO terms
	FFRAC_9_gene_3.46	uncharacterized protein FPRO_12781	MLDKPPTPSPAQDDDIYTVHINYPSCYLKPAGSVEPQLPDGTQSFDAQEDLWRPSPTDPKRQEFRIQGKNEFVFIAGAQYTYKPNTSLRIKCKKATFMPHPTDPSQKTVMVRLPGADAEQNLLAKAGDGNRGTTASFQSEVLGGLNPIRMVTKGATEGGQGADGATGSQGGDAGSLTIEADSYDTSALADCNLFFIADCTGGKGQQGGDGGDGGGGGKGVDAAGESVNVLCDTIDPNFAFRDQRGITLFPCRGLLEQLYGRTSDDEHQELIVKGFLGAKGGTAGQQGAGGYGGSGGEFTITLPKRSAGDDRLKARFGIRSNVGTPGTPGAVGKPGLGGRCGDSELFNLPRLKCPKDKFHDELRSKLHYDWSSDVLNKWAVYRANGTEPSPVNGDVPKTL…	complement 376875..378167				1.08014e-124					mobidb-lite (MOBIDB_LITE); mobidb-lite (MOBIDB_LITE)	no GO terms	no GO terms
	FFRAC_9_gene_6.96	uncharacterized protein FPRN_12312	MHRTSTFTLISTLDATPPASGATLIICMRGLMTVIRAAYYEATPTLPLGLISREKKKKKQPNHIWHEKES	complement 679983..680195				1.71561e-25					mobidb-lite (MOBIDB_LITE)	no GO terms	no GO terms
	FFRAC_9_gene_9.48	---NA---	MVPKKQFYILETRKSGSHLQFCQRKSWHAHGFLGQAVAVDATMQDRPPIHVEMFMDGRERVDSREVRGVSVETRGLKMPRPAEFRDLL	942207..942478				-					no IPS match	no IPS match	no IPS match
	FFRAC_10_gene_17.127	transcriptional regulatory	MLLTVASLWPGTISNHESVLTSRSYAAMYEARYRELDELCQKLQVVAAQLTKAIDKLPQGGCTDACSHVSSSASPTQRLLPQQGKVLATSGTATDSRSNGHSQSRPSDADEQNTDQSQEQVNNSGEFGTQAFGSLVHDSYGALRLVLESSACGTC	1764939..1765406	FFRAC_10_gene_17.128	MTDPESMREDEDLQLCIQLLRDLEVTWSGATRGKIIIEEVLRTSYDNQEGQQMNMDFQTLFQNPDLDLANLDLSQGFFENFWGTFV-------------------------------------------------------------------------------------------------------------------------------------------------------------------------------------------------------------------------------------------------------------------------------------------------------------------------…	1766995..1767255	8.13624e-69	P:GO:0009058; P:GO:0034641; F:GO:0043167	P:biosynthetic process; P:cellular nitrogen compound metabolic process; F:ion binding			mobidb-lite (MOBIDB_LITE)	no GO terms	no GO terms
	FFRAC_10_gene_18.102	transcription factor	MHSVGDNIGKCFVAFDDVIDALSRHVGLNLLFEHQISNEQARFRGWHGNPDQCFSATSSTTIPCYISHSRENNLQDLIGFLRYALYTIKKERNSSKQLSSSKNTIDLVGCGVDDGLIEDLALIFTDISHSISSLLKYTSVHDDETCYNGTKDVGGKRSPSPDSCVDDYGKGSYRDDEIGCFLPDCGIDREVITKDIRHYLGDNASVRLGYCEGMIQRLQEDSKRWQTAKNEAKKSGEGIAETRSDATTSADVIQRMPETYQPPHHGRGEGSNQNQMGISPGDARQNQKRSGHKVSSAKLRPDHPDLSQESMPRNLSATTSTDTGFASSPALPTIAGAIGTASTCEAKINSGVEVSNTTAAWIFGAVAAVTNGVTALATRQTAKASKRSAIAGEVAANAS…	complement 1791453..1793371				0	F:GO:0003674; C:GO:0005575; P:GO:0008150	F:molecular_function; C:cellular_component; P:biological_process			Coil (COILS); mobidb-lite (MOBIDB_LITE); mobidb-lite (MOBIDB_LITE)	no GO terms	no GO terms
	FFRAC_10_gene_24.123	hypothetical protein NECHADRAFT_102246	MQTVSQELPTDQNNEKHWTVDQNRRQMQVSDDAFIGRDLAHFNHHENSTMYYTGGVIMNLTQHLEDMRLLYSIYSDGAPHNHDYRISFGEGDWTVALAQVSGTQDGPLPSLQGTLLPPTNKVVHMDLMTIARWNNGWMMEEYLWSDNPLMYRQVGVLPDRPDDNLPDLELNLATPLSMKPGENHVALNKKSVKEADDALNHGRFTVKSLNLDHDALIYGLSDVPLNATGYIDWLEQFKSGFSDLRLENQPYKQIIGQGDWTATVAMLSGTHDGNLTLPVYLSEKPILATGKRFNLLHYTIARWQNGKIVGLRVNIDYFGICEISK	complement 2503637..2504895	FFRAC_6_gene_42.88	MLVPTIASLASWATVVSACGLSIPSAIHLMTRGDTPLFGKRATNFDPMYPVNQNTEVHWTVPENERQMQVSDDAFIAKDFARFNHHPNSTMYYPGGVVMNLTEHIEDLRLYFSTYPNAAPHNHDYKLIFGEGDWTVAISVSSAINGGAVSDLSGNWLPPTMKPVKFDLMTIARWDGGWMMEEYLWVDSPIMFRQMGILPIPPADDLPDIELSPYTAPLSTKPGVDNAKANKATMTASDDAFNAGTFTADALHLSQDVKVYGLTDQPLDLKSHLATLKSLKKTFPDLYLENKPYRHIIAQGDWTATVAMLSGTFKGPLELPPYLGSSPAKPNGRKFGILHYTICRWQNGKIVEMRVNADIFGIVGTLGIQPQ----------------------------…	complement 4197137..4198316	8.08968e-147					IPR009959 (PFAM); G3DSA:3.10.450.50 (GENE3D); mobidb-lite (MOBIDB_LITE); PTHR38436 (PANTHER); IPR032710 (SUPERFAMILY); IPR032710 (SUPERFAMILY)	no GO terms	no GO terms
	FFRAC_10_gene_24.124	related to C6 zink-finger PRO1A	MDGGAKQDEMTNNIKLEIKSRSRRSNPRQVNRTEYKTTSPSDITVFRSSDPTSGLGDNVIAPSDPADSAVSATEWLPSPDSGSVGSLSSTQVEPRAAHTPPLDPISTTFYLDHVFSHLYPFYRPSSRRGGRSWILELLMTSSAFQQIVLSYSTYYYDLAAPQNGRTQVDKLRQAESSVTSLSQSLQTLLSVGSLDGHTHCACRVLTSIVQHHRYEILTANSNWKIHFDGALALFTRLLDKYSNAVESLHHSSTRAGFNAIVHDLNVPRQEAFLFSVGLMIFDDIVAAASSNQEPQLFQYHQHLLGGNDPALELEVIIGVKSCILRLLGQVATLNAKKQQDQAAGNLDGLELAQRASTIMESLTANIEQLQESSSPSSNPQSGERDYLEELRAHYDSRGT…	complement 2509928..2511532				0	F:GO:0000981; F:GO:0003677; C:GO:0005634; P:GO:0006355; P:GO:0006357; F:GO:0008270	F:DNA-binding transcription factor activity, RNA polymerase II-specific; F:DNA binding; C:nucleus; P:regulation of transcription, DNA-templated; P:regulation of transcription by RNA polymerase II; F:zinc ion binding			Coil (COILS); IPR021858 (PFAM); mobidb-lite (MOBIDB_LITE)	no GO terms	no GO terms
	FFRAC_10_gene_24.172	Short-chain dehydrogenase reductase SDR	MASTLVALILGAGPRVGAGVAKEFSKIGYKVALVSKSGSDSITSEGYLSLKADLADLNTIPGVFQRVYNEWKASPSVVIWNAGARTVPPVDDDMFSLAQESLVQDININTLGPYVAAEQAVNGWKALAEGAKKTFIYTGNKMNIQPLPVPATATLGMGKSASSYWISLADTFCKGKGARFFYADQRQADGNMGGMGLDGAAHGQFFVQLAQQGKDIPWLATFVPGTGYVKF	2513588..2514339				1.80825e-153					G3DSA:3.40.50.720 (GENE3D); PTHR43669:SF3 (PANTHER); PTHR43669 (PANTHER); IPR016040 (SUPERFAMILY)	no GO terms	no GO terms
	FFRAC_10_gene_5.125	hypothetical protein FOC1_g10008837	MSDQSPCAILPESIDIPRITSTKQDSTLNYYGLVDASLVTEASKFLALHTDAVELELEPKIKAFLETTQNDCSGNIEEKKACWLTIRITKPSTAFKIPRWHQDGPMFKYDQGREDIVRSKYALTLLGPSTLMLQPAEHVFTTQREAEARYYWWQDKTDGPEPSEDEMYDADDLLRESLGDAFKDTPRVQVGHGQIARFSWGRDDSPVHSEPDLVSDRVFMTVLYGSDSELRTMSKWREAPYGEYSVE	complement 543082..543825				2.79782e-164					no IPS match	no IPS match	no IPS match
	FFRAC_11_gene_19.68	thioredoxin 1	MPITTINSQSEYHDLIKRHRFVILFATATWCKPCQSIKTVYEKYANASDYDPEKLVFAQFDTNELPALDVELKIRQVPEFFVTENAEQVKQLTGAKPLALTDLINAYVEWAKS	1894243..1894584				3.36693e-46	C:GO:0005623; F:GO:0016491; P:GO:0042592; P:GO:0044281	C:cell; F:oxidoreductase activity; P:homeostatic process; P:small molecule metabolic process			IPR013766 (PFAM); G3DSA:3.40.30.10 (GENE3D); PTHR10438:SF333 (PANTHER); IPR005746 (PANTHER); IPR013766 (PROSITE_PROFILES); cd02947 (CDD); IPR012336 (SUPERFAMILY)	P:GO:0006662; F:GO:0015035; P:GO:0045454	P:glycerol ether metabolic process; F:protein disulfide oxidoreductase activity; P:cell redox homeostasis
	FFRAC_12_gene_2.43	cytochrome P450	MAAPVATSPLERVTVGNGIEVDGHWFSAGITVGVCLYALNFTKTIHKDPYRFWPERWLSSENGATNGFTPEDVQRSGSNFFPFSAGHRQCPAQTLASRNLRCLSQICFGTSTFVQRQISYGR	288573..288941				2.35618e-30	F:GO:0004497; F:GO:0005506; C:GO:0016020; C:GO:0016021; F:GO:0016491; F:GO:0016705; F:GO:0020037; F:GO:0046872; P:GO:0055114	F:monooxygenase activity; F:iron ion binding; C:membrane; C:integral component of membrane; F:oxidoreductase activity; F:oxidoreductase activity, acting on paired donors, with incorporation or reduction of molecular oxygen; F:heme binding; F:metal ion binding; P:oxidation-reduction process			G3DSA:1.10.630.10 (GENE3D); IPR001128 (PFAM); PTHR24305 (PANTHER); PTHR24305:SF129 (PANTHER); IPR017972 (PROSITE_PATTERNS); IPR001128 (SUPERFAMILY)	F:GO:0005506; F:GO:0016705; F:GO:0020037; P:GO:0055114	F:iron ion binding; F:oxidoreductase activity, acting on paired donors, with incorporation or reduction of molecular oxygen; F:heme binding; P:oxidation-reduction process
	FFRAC_12_gene_3.38	anhydro-n-acetylmuramic acid kinase	LSGKLPMAPYLSLESITPVSPPRLERSVTFEPGPDGHPLRPKYIDGLTVNWPEELQPLILRAFNNDLTIFEMTHLNYAAGAVYAEAANALMKHVGLQPDDIDVIGYDGQTIYQEPPEREEEMAYLKSGNGSLVDLWTKGGYPCGLFIVESGVVAALTDVDTVTQFRPVDHALGGNAAPLMQYLDFVSFRSEGTTATLNIGGIANLQVADADRTKMMAFDTGPGNVMIDHIVNARAGRGYDENGELAAKGTIILPLLAQLEQHQFFSRKPPRSAWRLDFGASYADGILEQYADSSTEDLVATLTMFTATSIMRALTEFVLPRTSVTRVIASGGGVRNLTLMKCLSFELDKQGLKLESSDVYGLPAAYKEAIKFATLAFSCKRGIANNIPYAGGANKYAVL…	296380..297888				0	P:GO:0005975; F:GO:0016301; P:GO:0034641; F:GO:0043167; P:GO:0044281; P:GO:0051186	P:carbohydrate metabolic process; F:kinase activity; P:cellular nitrogen compound metabolic process; F:ion binding; P:small molecule metabolic process; P:cofactor metabolic process	EC:2.2.1.2	Transaldolase	G3DSA:3.30.420.40 (GENE3D); IPR005338 (PFAM); mobidb-lite (MOBIDB_LITE); PTHR30605 (PANTHER); SSF53067 (SUPERFAMILY)	F:GO:0005524; P:GO:0006040; P:GO:0009254; F:GO:0016773	F:ATP binding; P:amino sugar metabolic process; P:peptidoglycan turnover; F:phosphotransferase activity, alcohol group as acceptor
	1Values indicated after the 'FFRAC_' are indicative of the pseudomolecule (1-12)
C	SeqName1	Description	AA sequence	Location	Multiple copy gene	AA sequence (multiple copy gene)	Location (multiple copy gene)	E-value	GO IDs	GO Names	Enzyme Codes	Enzyme Names	InterPro IDs	InterPro GO IDs	InterPro GO Names
	FPIN_1_gene_10.36	---NA---	MQTAVEYETKLKRDEFALQGLNILQHESFEVFLIMKQRQREEEEAERRRKAEHDLQQELKQKEHDQEEAYKQRKKPGQRSNQGIMSCFI	1027361..1027630				-					Coil (COILS); mobidb-lite (MOBIDB_LITE)	no GO terms	no GO terms
	FPIN_1_gene_34.42	Uncharacterised	MASSQPTVAAVDPPPGWPPYRSYLGQNYRWITAYNTYVNAWTTWASKDPNEDENKWKKAMNHVYATKASLSRDITQAARKETETHGERYDDRWYPKSDISGIGPYNEAGPSINMSNLTIFEGLAPVRPQTS	3480718..3481860				6.24e-15					mobidb-lite (MOBIDB_LITE)	no GO terms	no GO terms
	FPIN_1_gene_34.43	---NA---	MMSILSDASALLDGTGMDSYKHVSVHGQAYHGNVVLHIRRRRVELEVALDDFVNCTEEVLLGCNLSPCANGIHASLSANTTQLSTRCIGAETRDELPPDVSLNGHGFSVDAQNVGTSLKVGQRELDLSIDTARSHERRIQCRGSVGGKHDLDVSTSIETVKLRNKLQHSSLNLVVSTSTIVKSSTTDGVDLVEENDTCLLCTGHLEELSNHSCALADIFLNQLTTNNSDKGGVCSVGNSSGTEGLSGSRGTVEEGTLGRINTEVDESLRRQ	3482224..3482493				-					no IPS match	no IPS match	no IPS match
	FPIN_1_gene_42.50	hypothetical protein FOYG_06589	MGRRESCVGFLSKLEDCRTFAELSPNLDADLLIDTLLLLLDLLLELLDRCTIRRGTVRLENLNIPGASVSGLMALSFPQEGIRTRLLEV	complement 4250597..4251043				8.8768e-13					no IPS match	no IPS match	no IPS match
	FPIN_1_gene_60.72	lipase class 3	MSQWARDSESNLASLSLDSRCHDLVEAADPLLLPNLLPGEKRRSNGAKPFSDIRHHLHLLNSTQPSVEPVWGGEWMVQDKPTINRPTKKHRLACLARRTPGSHSSGRADATTDKLHGCHTQCHLVHSEHPSIQLSLRDMICATRYAHR	6060404..6062188				0	F:GO:0003674; P:GO:0006629	F:molecular_function; P:lipid metabolic process			IPR002921 (PFAM); IPR029058 (G3DSA:3.40.50.GENE3D); PTHR21493 (PANTHER); PTHR21493:SF196 (PANTHER); cd00519 (CDD); IPR029058 (SUPERFAMILY)	P:GO:0006629	P:lipid metabolic process
	FPIN_1_gene_60.73	uncharacterized protein FPRO_01869	MNPLPPPTTLDDARRQVRIRHLEQLSHANITLTPPADDEDTSLLPSCKILTKELKKWSQDHIKGIEEATLKNVLSGKENIDWNCCFLAFMESITVYLRDWEKLHNAVQLYKSVKAGTSANGDLHKVHDLYEQSIEGIKEVAAVWGMEFMQICDLTKGHNDKNPKWNGPFCGAFFPKDHKQGAPYVGITFKGTDPKNIKDINVDSSFDPIQVDAKHLFGTVVSEGVYNALFGTFNNKDILSPFELILNALQDFVPKLQGEDKTEPLLHVTGHSLGGSYSSFCFAQFMMQNASLPAGARLGDLYNFGSPRVGQKAWSQAFYENLGGKFPGGAWRIVNDKDVVPQVPSLLRYKPKTGPFYHIDNGIQIFKQAKPTPIESERDGTGNVDIGLTRIGFVRELAT…	6065803..6066742				9.18439e-167	F:GO:0043167	F:ion binding			G3DSA:1.10.1330.10 (GENE3D); G3DSA:1.10.238.10 (GENE3D); IPR018247 (PROSITE_PATTERNS); IPR011992 (SUPERFAMILY)	no GO terms	no GO terms
	FPIN_1_gene_60.86	uncharacterized protein Y057_7009	MKITNSFSSLCLMCLIIGLTFIKYTAAACCPCSIYLTCGDSSGCTVYECCSTAACNIFCCNCDGPCKGGKSTDLSDEKTANLCLSKFTAVDVNQDGMISFLEWAQSRDAFAGLGLDVLAERWNQYDWERKGYLTKDEAMGRRIAPSKPGSDTKDTTLVQQPFDYQPRLQENLKPNELSRGAWTLQWFTDNDCSKGKHRTEGTKPKGCSNIAGANGIKFTATQGFSLYVYGRQNCGGIPRIIPSNPECYPLNVKGLSFKVVG	complement 6054892..6055286				2.27361e-54					mobidb-lite (MOBIDB_LITE)	no GO terms	no GO terms
	FPIN_1_gene_60.87	uncharacterized protein LW93_4671	MASIKFNNNYIRVDCDPTVKSVNLFLSDKGEELPNDGKFSTKPYSGESKKIRLTYKSPPPAPATYNVLNAVTFPENAQVTITGGRDGTQLVMVEDKNGNKGTWGLVGGEEEEDEE	complement 6057131..6058122				4.38027e-164					no IPS match	no IPS match	no IPS match
	FPIN_1_gene_8.16	---NA---	MLYKAILASLVLASSGFATVLNVNVYTDAKSANAGSQQDQIVLDDKKSNAPAWKGRDERHLVPLLPGARTGVIPADVEEGLIAALGPRFANEFIKVGLESEGEMDTPTAGGCGLKCAKTLIKAMPCIIAAAKCKCKEPILKCPVKLKELCNCVPCLPEKLRKFIDKIKVCQSSTLDELSDFERAIDDSLDYGNFVSFETQDVNLLAYRVSLPLSPPTGDLSKTTLEEARALAKGGYCPGQYCGDNGCCLGLCLFEDECFGQELELRGQESRRLEL	867217..867693				-					no IPS match	no IPS match	no IPS match
	FPIN_2_gene_19.13	hypothetical protein FOC4_g10011613	MNTASIFEGLAKSTSYKSPATADLQPAYKHNVSEQGRTTEDDRPAEEEPLECLVYYLFSHSIFRLARKPLIRYLRDQATIKPIRQSPSLEIITDLPSMLFGSLPLLLSIWALTSYCWIPLCGLMVWERTGSDVVYECLSWILKGFGIVMNVMGRTYEGVTTMKTSTVISNGSRRALQWVDGQMDDDGSLGSLLYPHYGTS	complement 1907219..1907821				1.82311e-129	C:GO:0005575	C:cellular_component			mobidb-lite (MOBIDB_LITE)	no GO terms	no GO terms
	FPIN_2_gene_22.38	---NA---	MDSVTILIHVLLNFWPDPASILPLAMLSACLLGNRGSTPWLGRRARPSPAQDDRHWEPKPSLQWVS	2249839..2250039				-					mobidb-lite (MOBIDB_LITE)	no GO terms	no GO terms
	FPIN_2_gene_38.41	---NA---	MGYGFTSSVHHDHSLGDSHHLVGIRPLGSGGGGIVLHGTARRRPITGAIIIVIATRTTISVAVTTTATTRTISTGRATPIVVVHGRRIRSTSWGAGSTALARRHIRLSLEGHVRLEFLQREGASLSYVSNALDSLALKFTPIELLNSRSKVCCSLEFDEAGPC	3829130..3829724				-					no IPS match	no IPS match	no IPS match
	FPIN_2_gene_6.22	short-chain dehydrogenase reductase family	MPCQKNQKPSSTVPSREMSALPDFWLPVFWKNQFRTTIELPTREKYPQVQGSTAIITGSNTGLGFEASKQLLSLGLSHLVMGVRSLEKGKVAAEKLRTIAPSARIDVWQLDMQSYDSIQAFTKRCDTELSRIDFVILNAGLSPSKFELVPGTGHEVGIQVNHLSTALLTILLIPILKTKSSGHGPPRLTTVNSLTAHLCKFPNKDERPLLASFDDPKITPWDSQERYGVSKLLNQLFLVRLCEKVNPDDVIINMVDPGLTKGTHLGGHHELGGVAGALAGAFFAICGRPVDRGAASYTNAVYGHGKESHGCFLMSCEIAPLAGWFYTHGDVLVDQVWNETMEELDFAGVNGIVSGV	670639..671759				0					IPR002347 (PRINTS); IPR002347 (PFAM); G3DSA:3.40.50.720 (GENE3D); PTHR43157:SF11 (PANTHER); PTHR43157 (PANTHER); IPR016040 (SUPERFAMILY)	no GO terms	no GO terms
	FPIN_3_gene_0.0	tetratricopeptide repeat	IKKYSFNKDVKFINWLEHSNKLGVLVLGGKEKTPTVMQCPVLLDEVAAWKREWLDAQPGKVSAFQEDDFYSEYEPEFSLRALDGLVAPLDQLTKPGDLVVLCPTGVLHSIPLHALYISDKVPVIERNPVIYSASLTTLSQCCRRGGWLEVDSGQRPAASVATQWTLTSVLQESDDRWFDPEEQEDVYSLISNTAATPDAKAVTGTDVTRHDATVADQSLELADGNIAVRDIFDLKLKVPHGIAAGDEPLGIVTALLCAGAGSVLGTIWPTASRTGRCFTDEFYTNILEQQKRSIDVSTDVGGHAAIIDLAEVSQRAVRNIDTRHPSHWGAFVLHGCWFMSRRGQHPASAH	19628..20726				0					IPR024983 (PFAM); G3DSA:3.40.50.1460 (GENE3D)	no GO terms	no GO terms
	FPIN_3_gene_2.40	alpha beta hydrolase	MSTIIRNTLTPKTVSFPCGGDHIAGHLYLPENFDPNQRYPAVVVGGSMASVKEMMAGTYAAELSRRGVIGLAIDYRNYGQSGGAFRQREDPESKAADLSAALEFLSHRSDVAGTGLLGICTSAGNVLYPAASNPRVKAVATVAGFFPSASVAPLLHGGEEVIKRRRAEGQEAIKLYNDTQEIKLIKAYGGSANESASPGEKPYYEDVTRGNIRQWRNEFAVASWEAWVGWDPVGQAALVQAPTLIVHSEKAAFPDQAREVYRNLKWQKEIVWVEGTHYDFYDDVEVVRSTADKLAKHFHTYLN	complement 281773..282684				0	F:GO:0016787	F:hydrolase activity			IPR029058 (G3DSA:3.40.50.GENE3D); PTHR17630 (PANTHER); PTHR17630:SF61 (PANTHER); IPR029058 (SUPERFAMILY)	no GO terms	no GO terms
	FPIN_3_gene_38.59	uncharacterized protein FMAN_04798	MAWFTTVILQAFGFTPNGPLLGSLASWIQGLIGNVAPRSLFAIFQSAAMGGYGVEILGSVANMFSALTTCAFARLAYSAFGQARESGNGTYTG	3849682..3850016				1.16932e-42	P:GO:0006807; C:GO:0016020; C:GO:0016021; F:GO:0016151	P:nitrogen compound metabolic process; C:membrane; C:integral component of membrane; F:nickel cation binding			IPR009311 (PFAM); IPR009311 (PANTHER)	C:GO:0016021	C:integral component of membrane
	FPIN_3_gene_4.79	lipase esterase	MSESIIRGPGLAKIDPEWEAFEKQFPVPPLLGTPQKLRLRLKFPKTNSPPVGYSIRDVEVPGYLGATNQLRLYTPNDSSEPLPVVIYVHGGGWTIGDLDSEDKVCRTMCNSTGVIVASVDYRKAPENPFPIGLEDVWQGVLWASLPCYNHDKLLMNNRWPQCRREHSMCLPSTFQCRYRTSNSYKAAVLAQRARNVRNIAFRGQILRVPLVVHTDAIPRELDFSSYAENATAPILPAAAVIQCLGYYGAPPEDIRISPLLAKDHSGLPPAYIQVAGADPLRDDGFAYAERLQKAGIPVRVSVYAGFPHAFMNFPLRSAMKSDEDLIKAIKWILEI	complement 438369..439639				0	F:GO:0003674; P:GO:0008150	F:molecular_function; P:biological_process			IPR029058 (G3DSA:3.40.50.GENE3D); IPR029058 (G3DSA:3.40.50.GENE3D); IPR013094 (PFAM); PTHR23024 (PANTHER); PTHR23024:SF266 (PANTHER); IPR029058 (SUPERFAMILY)	P:GO:0008152; F:GO:0016787	P:metabolic process; F:hydrolase activity
	FPIN_3_gene_5.62	Serine threonine- phosphatase 6 regulatory ankyrin repeat subunit A	MPNKNSFRLSLALLLLLVVETLANDEDTDFLMNVFSDLGPVLALFGEQFARQFLSETFTWYDHIIFACVPLGIMTAIAGAIRVEGRGVLRAFIGRARENRAAAEIDFMSSTSAEVGELFNGKGIVRTMGRSDIAQFIVFPDSFLETDEKASSENQTGTEEPQQHSPDSPDREEPEQTKERREAQSWGIHTLKSAKGKGILSKEDYRDDLVVGLLKWLKPFELPAKSREREPEDGGDSSTSSGAQGRNDDHEYWSSLQYPNLQLNIASKKISSKQRSIELQLAAVAAVILQVSLLAIAVVIPYRVDGYGQQQPWGLPCYIIGSVLLSSGMLCCSIAIERSTEEFKWNPSNSSNNSEPSKQQVNLYWVQRKQRVSDQDFGSYIIYAQEKEFFSTSSRREDV…	complement 488500..495094				0	C:GO:0016020; C:GO:0016021	C:membrane; C:integral component of membrane			IPR002110 (SMART); IPR003877 (SMART); IPR020683 (G3DSA:1.25.40.GENE3D); IPR003877 (PFAM); PF13857 (PFAM); PF13637 (PFAM); IPR020683 (PFAM); IPR020683 (G3DSA:1.25.40.GENE3D); mobidb-lite (MOBIDB_LITE); mobidb-lite (MOBIDB_LITE); mobidb-lite (MOBIDB_LITE); mobidb-lite (MOBIDB_LITE); mobidb-lite (MOBIDB_LITE); mobidb-lite (MOBIDB_LITE); mobidb-lite (MOBIDB_LITE); PTHR24123 (PANTHER); PTHR24123:SF38 …	F:GO:0005515	F:protein binding
	FPIN_3_gene_50.43	Uncharacterized protein LW93_1453	MATCDVSISFSALVVNINRPWLFGELFSDVDIEVAKGVKLSPGLILLQKMIKEQNATDITTWSQFPAYPTSFIVASDTTIEFTGATKHIEEHFDSHSNSGGASVGYGPWSVSSTFHESASEQSMQVHYTSTGCKISFGAPQIIRWATINPQQLILSGTIPSIGLSHETDFQILQSPTTSLPHSHSFTTVLAPSTPAAQAFKSRFDVGQNGNVPSNSGWNPNDQSGGRRPNSRSSPWSKSFLACPYYIRDPIRHFGCINLKLDTYGRVKQHLKRNHLSFDANNIGGFVCESCGMVSPDESSRDIHRVSTECAPVTLANEHGLSRQAWEGLEKRLKSGSTD	5032512..5034586				7.8306e-98	C:GO:0005575	C:cellular_component			mobidb-lite (MOBIDB_LITE)	no GO terms	no GO terms
	FPIN_3_gene_6.40	ankyrin repeat domain-containing 16 isoform X1	MYSLELEKGFQEEFCQSTDLDARLLMKTCARKKPVLAANILYFLGRDRVQGAIHQYDNNDMAAVHYAAAVGDVDALKVLLFPWNLFKRKANIWRLQEELEQSGRLPSPRRDSQGDYMVSDYLPDSIGPPQSWLDLFEELPASTKDRIELPNINFSEWQLTESESCLIPEKLKSEAKSRTPLHEAALHGRLAAVKFLLSYSRIDAKAGDVDGKTAAEIALDRGHYDIHNLFITHMRGR	642495..643208				2.85951e-24	F:GO:0003824; P:GO:0009116; C:GO:0016020; C:GO:0016021	F:catalytic activity; P:nucleoside metabolic process; C:membrane; C:integral component of membrane			IPR020683 (G3DSA:1.25.40.GENE3D); IPR020683 (PFAM); IPR020683 (PROSITE_PROFILES); IPR002110 (PROSITE_PROFILES); cd00204 (CDD); IPR020683 (SUPERFAMILY)	F:GO:0005515	F:protein binding
	FPIN_3_gene_6.90	hypothetical protein CDV56_06679	LSDIGPSYGTVNYKIPSSPLLDIQYSATFALIFTMPSEEYLASLGAYSTVVATVIGLGALLLTTQGSSAVSTASRKVRASIRPSDNQCARHRWEDIQGYELHVCTAIWPRDCHEGAHSQDETCWNQTLLTVINCWQANASDRFVKKPEQLPLSKTFIQVDYKVILAFIFMCSTHNDRDDNVIYSKERGLYVAGVELRLQELNSGTLIVHLTGNLTRNLTKDYVDRLVRGHPPLLDDPLGYSITKENDEARGGWVVALGFDPETTKERFLPVYLDCVRRRTRRGLVFRRSMDRVLDIIVNIWSKCFSGDAGSSKRIDLAIKAIEYIKTSQTQSGVDNIFGVKRPFVPPTESQKRKIIEHFNSPPRISEDMQAAFQAEWEPLLRYALVAAVTGCKICIAYF…	complement 638968..640400				1.08381e-112	C:GO:0005575	C:cellular_component			no IPS match	no IPS match	no IPS match
	FPIN_4_gene_3.12	alpha beta hydrolase	MENTKTHILPDGRTLAYGVYGAGSDTPAQNIPTVLHFHGVPGSHHEAAAFHASAILHGIRIVAISRPGSSLSTPQPNSTLLDFPADVVALADHLKIQRFAMLGFSAGGPFALACWHCIPRTRLVGASLVASVLPVSLGSEGMNTMSWTIFKVARWAPGLLAWIFDWKLGSLARDEQHPERLEQQWEADLASNHGPDYSAWKGDVELRSALVKSLREAVRKGSSSVAWEYRLLGMDWGFELGELDVEPGQMVFWQGERDTNVSMATLRKVASIIPEAKLCVSNGDGHLSSMKQENIMANLKDILRS	332225..333142				0	F:GO:0016787	F:hydrolase activity			IPR029058 (G3DSA:3.40.50.GENE3D); IPR000073 (PFAM); PTHR42886:SF16 (PANTHER); PTHR42886 (PANTHER); IPR029058 (SUPERFAMILY)	no GO terms	no GO terms
	FPIN_4_gene_4.119	malate NAD-dependent	MTKIALLGAAGQIGTPLSLLCKASNLFTDIALYDIVHTPGIATDLNHIDTKATVSGYLPSNDGLAKALSGADIIVVTAGIARKPGMTRDDLFNTNASIIRDIFTQVAKTCPEAISCIVTNPVNSTVPVAAETLRAAGLFDPTRLFGVTTLDVVRASTFAAHALGGDADPTSFKVPVIGGHSGATILPLYSQAQPPIDLGTELPNVINRVQFGGDEIVKSKQGAGSATTCMAYAGFRFVKAIITARSGTPVVEEAYVFLPGISGGKEISTELEVDFFSVRVKLGQRGAEGLLPIGNLSDSEKILLGKAVEELRVNIQTGLSFVAGK	418594..419789				0	P:GO:0005975; F:GO:0016491; P:GO:0044281	P:carbohydrate metabolic process; F:oxidoreductase activity; P:small molecule metabolic process	EC:1.1.1.37	Malate dehydrogenase	IPR001236 (PFAM); G3DSA:3.40.50.720 (GENE3D); IPR001557 (PIRSF); IPR010097 (TIGRFAM); IPR022383 (PFAM); G3DSA:3.90.110.10 (GENE3D); PTHR11540:SF33 (PANTHER); PTHR11540 (PANTHER); cd01337 (CDD); IPR015955 (SUPERFAMILY); IPR016040 (SUPERFAMILY)	F:GO:0003824; P:GO:0005975; P:GO:0006099; F:GO:0016491; F:GO:0016616; P:GO:0019752; F:GO:0030060; P:GO:0055114	F:catalytic activity; P:carbohydrate metabolic process; P:tricarboxylic acid cycle; F:oxidoreductase activity; F:oxidoreductase activity, acting on the CH-OH group of donors, NAD or NADP as acceptor; P:carboxylic acid metabolic process; F:L-malate dehydrogenase activity; P:oxidation-reduction process
	FPIN_4_gene_41.70	hypothetical protein FOQG_19212	MAVRLAKASDLAATSRIAFRAFSLSPWNAFYRPFASAYPQDVEKSYLREQQEALGDQNKLFTVVLQAEQVVGFAIWNYAQQQQQRKSGTAAIDLADEKGS	4148978..4149280				1.02169e-48	F:GO:0016746	F:transferase activity, transferring acyl groups			G3DSA:3.40.630.30 (GENE3D); IPR016181 (SUPERFAMILY)	no GO terms	no GO terms
	FPIN_4_gene_43.47	Uncharacterized protein LW93_9433	MERSHFDRRPPMYSRELDPSEAAPPYREIPSPPPYPTVPSPEYLNEKFRYFYLCKKKDAWMPALADFLAKNKDYTFELFGNDTWLRIILPEDCYMSMEFEELRNKRKKVEAALKRGKVLRYWQIDRPMNYSTQVGLIESKLRTEYQKRLEQDELFRRTEATKTASAISKELSQSVRNFFSPF	complement 4304866..4305414				1.60481e-50					mobidb-lite (MOBIDB_LITE)	no GO terms	no GO terms
	FPIN_4_gene_45.31	cytochrome P450	MYPTGKMEHKQLAVSVLPEASIDSNTMQQPMQNVSMRIIGGFIKQNPAVDYLLKADGYQLLQASLAALLAYVLISSLTVKSTVPDGVPFPWADTKSKSFFANWRVGKLYALNSVRQWLAQGSEKFLEKGKSYALPDFYGRRPYIIVPYHRTKLFLDRPDNATSLRHAANDIVVSDYSFPDSKIFRDHYGAQIMYRHLPRALPRLVGEIWDEVSYICDKDWGTTPGEVREISTYHKSFEMIVSLASRMLLGTACSRSEDFLANVREFSLDVFRCMALDALLPRGLTGILGPYLVSLPNRWHVNRIHKHTMPLIKKRLEDLAFNDANPDEKRAVPDDYISWHIRFAQTEKNPAALEPYYIASSMLSMQFATASSTRYALTNLFLDIFSTKPEEGVVESLRE…	complement 4542637..4544994				0	F:GO:0016491; F:GO:0043167	F:oxidoreductase activity; F:ion binding			IPR002403 (PRINTS); G3DSA:1.10.630.10 (GENE3D); IPR001128 (PFAM); PTHR24279 (PANTHER); PTHR24279:SF101 (PANTHER); IPR001128 (SUPERFAMILY)	F:GO:0004497; F:GO:0005506; F:GO:0016705; F:GO:0020037; P:GO:0055114	F:monooxygenase activity; F:iron ion binding; F:oxidoreductase activity, acting on paired donors, with incorporation or reduction of molecular oxygen; F:heme binding; P:oxidation-reduction process
	FPIN_5_gene_1.113	FAD NAD(P)-binding domain-containing	MRVAVIGAGPGGLVTLKYLKEAHKFFNLDPVEVRLFEREGAVGGTFTQRTYEDAELVSSKYLTCFSDFRADLDDPDFLSAERFIRYLKEYADHFHLWPEISLNTSVTSVRRGQAGGHVVHYRGADGVDMKWECDAVSVCTGLHVTPNIPDVKGIDKVKIVKHSSQFKKREEFPQGGTVVVLGTGETGMDIAHLAVTSPTKRVVLCHRQGFLGAPKRIPTPILLPGLLGRSSKPNGPELPIDVSWQAPLLDSYLPPFLRDRLFTWRFQDINIKLANWLCSGTTKGVDQWVGGLDKDRFHTSQSFFNKAVWRSLHYISEPYRPTDPGIIERIRRSLITIDVPKVPDGRYIDLAPWPTHIDSEGIMHFSENGRPEAERMKTLPPVKPTMVVYATGYTQEFSI…	complement 122176..126966				0	C:GO:0005575; F:GO:0016491; F:GO:0043167	C:cellular_component; F:oxidoreductase activity; F:ion binding	EC:1.14.13.8; EC:1.14.13	Flavin-containing monooxygenase; Acting on paired donors, with incorporation or reduction of molecular oxygen. The oxygen incorporated need not be derived from O(2)	IPR000960 (PRINTS); IPR001128 (PFAM); IPR020946 (PFAM); IPR023753 (G3DSA:3.50.50.GENE3D); G3DSA:1.10.630.10 (GENE3D); PTHR23023 (PANTHER); PTHR23023:SF179 (PANTHER); IPR017972 (PROSITE_PATTERNS); IPR001128 (SUPERFAMILY); IPR023753 (SUPERFAMILY)	F:GO:0004499; F:GO:0005506; F:GO:0016491; F:GO:0016705; F:GO:0020037; F:GO:0050660; F:GO:0050661; P:GO:0055114	F:N,N-dimethylaniline monooxygenase activity; F:iron ion binding; F:oxidoreductase activity; F:oxidoreductase activity, acting on paired donors, with incorporation or reduction of molecular oxygen; F:heme binding; F:flavin adenine dinucleotide binding; F:NADP binding; P:oxidation-reduction process
	FPIN_5_gene_15.46	hypothetical protein FLAG1_07246	MMVHEDEDSGPTSTGSGSGGAKHLPSGSASTNRLPSGRQTVYEHLPSGGVSLNRLPSGRQTVYEHLPSGDVSLNRLPSGRQNHGHLPSGSVSMVTPLPSNVRGGNDVVMKGTEPSERPSHGHTVDSKDDDGNVGALTRESEFDEFPDSDLDGLLEAEIEQLVGPALLRAPIAEADEPETRENEVDEFSDLDVEDLTEVDFQQLESQPLGQAPIVDEDDGQKTRGNKVEEFLDSDLDSLSEIDIQCLLDQAVPRSVKAVDGGDSEAPVMDVGESIDSDALIMDKDRIDMYVEDMEEGGLEFLLDEIFTQQGNSTAAAVKGSQSQGLVEETSHIAPAERPFYNRIYVVCDLLCQFARDEKEWSSARSPFTFYSWSWFRNAEAGRLTDMVFNFVVPAARQIL…	1570058..1572140				7.65957e-28					mobidb-lite (MOBIDB_LITE); mobidb-lite (MOBIDB_LITE)	no GO terms	no GO terms
	FPIN_5_gene_2.83	P-loop containing nucleoside triphosphate hydrolase	MEVKDQPTMVIAVMGVTGSGKSTFVRTASGNNEVVVGHSLEACKFFISISALSTIIFTGRTGTQEITSWTFSARGHTILLVDTPGFNDTYKSDTEILLDIAKWLEVVYRQDVKLAGILYLHRIKDVRMDGGAMKNLKIFRKLCGKDPMKSVVILSTFWGEISHERGVAHEDELKANPDFWGSMIEHGARVARFDGTKESALDVLMLFAGKAKMTLDIQRELVDEEKSLSQTAAGSAVNEELHRLEAKYSEELKRIQKETAEALAEKDTQYEKILEAERTKTEQRLERIYSDQVALRQERQEEMRRIVADNQRHIGLLQKEGGGERSKLGSRFVQLVASGTAAAVTPLAIPVALASLANFMSSAGKVVLEKKGYKKG	complement 265402..266532				2.24807e-154	F:GO:0005525; C:GO:0016020; C:GO:0016021	F:GTP binding; C:membrane; C:integral component of membrane			Coil (COILS); G3DSA:3.40.50.300 (GENE3D); IPR006073 (PFAM); cd00882 (CDD); IPR027417 (SUPERFAMILY)	F:GO:0005525	F:GTP binding
	FPIN_5_gene_33.61	---NA---	MKEAQSLIGPIEIANPGIPRSITDSVSETSETVRKDQDGVWRVNGDDDVGENMANSASDADSSLSNPSMQCIVQYCC	complement 3304044..3304277				-					mobidb-lite (MOBIDB_LITE)	no GO terms	no GO terms
	FPIN_5_gene_46.1	hypothetical protein FOYG_08984	MPIRMKRLSRSDPDYKEHENKFYHSWRHDEKSAKVKSIYLAGKDDIDKSYRGQRFFAYLNGARYKRLYHGTSRACHIGESGNDLRLCYNDDCGTSTLMFQDDGGMFGPGIYSTPTSSKADVYVKNHHVSSNLHAMLICYVVATKPQRKFVANHDITRPSRGYNCVEGVTVDNGRSLLYPEFVVYRESAIVPVGLIMYTRKGWEPL	4690219..4691185				1.41285e-125	F:GO:0016757	F:transferase activity, transferring glycosyl groups	EC:2.4.2.30	NAD(+) ADP-ribosyltransferase	IPR012317 (PFAM); G3DSA:3.90.228.10 (GENE3D); IPR012317 (PROSITE_PROFILES); SSF56399 (SUPERFAMILY)	F:GO:0003950	F:NAD+ ADP-ribosyltransferase activity
	FPIN_5_gene_46.150	subtilisin-like serine protease	MLSFLKQLAIAACVPLLVTASYPIAVIVEFDGTSHCKEDAESLTRAAAVSLRNVDIACTVSRRYVYNHWSFRGASLSIDCNTDVIPTKSIVTTIRSIEGVGNAWPITTEKPPPLSSRGTGISKTELFRRRYEQNNHGRGLTLNNNLNHRSDSDSDTLSTHIDTGVARLRAENITGAGIRVAVLDGGFDLTVPGLRLTSVGYTHDMINGGDDVQDECWFHATHVLGIIGAKGNGAEHNVSGVAPDATYELFRIQPCDSSSATEDARLASLIDAADRGVDIITCSYGSPGAWPEDPWTSVADRIAANGTLVFFPAGNRGPGIFSGNSPADGDYVTAVGSVDNSVTPYYSWEATWSTANSNAAGSFSIVPSSPFNFPNNTKLTVWAPNVSASDDCLPMPDRS…	complement 4700286..4703137				0	C:GO:0005618; F:GO:0008233	C:cell wall; F:peptidase activity	EC:3.4.21	Acting on peptide bonds (peptidases)	IPR015500 (PRINTS); IPR000209 (PFAM); IPR000209 (G3DSA:3.40.50.GENE3D); IPR010435 (PFAM); G3DSA:2.60.40.1710 (GENE3D); PTHR43806:SF17 (PANTHER); PTHR43806 (PANTHER); IPR023828 (PROSITE_PATTERNS); IPR000209 (SUPERFAMILY)	F:GO:0004252; C:GO:0005618; P:GO:0006508; C:GO:0016020	F:serine-type endopeptidase activity; C:cell wall; P:proteolysis; C:membrane
	FPIN_6_gene_1.25	hypothetical protein FOC1_g10006220	MATADTPDAPEPPYATQYLTMIKHPTGYTPESGCQLLRPGAQGAIREFVKKAYQDYVLGCPQPWYLSTLIQVNVFSALVQNGVALGFSDHWQRKGVMSPFSILGPLQSHDSFPPNLQPTALQRTIPHHPWIDLFPIPQMRDNILLSLHRLDMDELCGDLLDVKPGLDGKPSLIVWGDPWDLHGWEASPLFLQKWGWMLEGCRDILYATNYWRESRGEDKIPF	94236..94904				8.99264e-141					IPR021833 (PFAM); PTHR38116:SF2 (PANTHER); PTHR38116 (PANTHER)	no GO terms	no GO terms
	FPIN_6_gene_1.67	related to alcohol dehydrogenase	MSLPQKSTQWVVKRFDGPSGLEMQVAPIPQLGPDDVMIKIHAISLNYHDVGTLRGHFEHSLKDVVPVSDGSGVILAVGSNVQSFQIGDRVTTVMNGAHQSGPIKPYYMNALLGNACHGVLQDFVEGSTLPVAGLTAWNALFGAQGRPLLPGQWVLTQGTGGVSTFAILFAKAAGAKVIATTSSAEKAKRLRDMGADHVINYREVESWGAQAQALTPGAEGVDVVVEIGGGATLKQSLAAVKMDGLISVVGVRAGAHPEEQPVLMDMFFRFCTTRIAYVGPHVQFEEMNRAIEANSIKPVIDGRVFSLEEARDAFEYLESMKHFGKVCIEVVKGV	complement 92184..93495				0	F:GO:0016491; F:GO:0043167	F:oxidoreductase activity; F:ion binding			IPR020843 (SMART); IPR013154 (PFAM); IPR013149 (PFAM); G3DSA:3.90.180.10 (GENE3D); PTHR11695 (PANTHER); PTHR11695:SF636 (PANTHER); cd08276 (CDD); IPR016040 (SUPERFAMILY); IPR011032 (SUPERFAMILY)	F:GO:0016491; P:GO:0055114	F:oxidoreductase activity; P:oxidation-reduction process
	FPIN_6_gene_2.136	Lactose permease	MSTKAAGTARHDRNVGVEITTGFDGSVLNGLQAIDKWQSHFGHPEKATLGLISASMAIGSVAAVPIMPYLNDRWGRKMSVILGSMIVTNGVIIQTASINIGMLIASRVIMGFGLTICLSGAAQLLTELCYPKERAVIIGCFQVSWYVGSILAAGLTLGTYNWTSDWSWRLPTIFQIVPSLLQLGFVWFVPESPRWLISRDRHEEALAILVEYHGEGDPNSAFVAAEFRQISETLRLEKEASTRPWRELFATRTNLRRVAVALCVGLFSQWAGNGLVSYYLAKVLATVGITSRLRQQQINLSLSCWNLLTGAAAANFGTDFFPRRTQLLIGFGSMCAIFACWTGASAVFAGDETNNSAAIAVVALIFIYYAFYNLMMPLQYLYISEVFPFIHRAKGIAIM…	complement 280330..283401				0	F:GO:0003723; C:GO:0005575; P:GO:0005975; P:GO:0006464; F:GO:0016301; F:GO:0016798; F:GO:0022857; F:GO:0043167	F:RNA binding; C:cellular_component; P:carbohydrate metabolic process; P:cellular protein modification process; F:kinase activity; F:hydrolase activity, acting on glycosyl bonds; F:transmembrane transporter activity; F:ion binding			G3DSA:1.20.1250.20 (GENE3D); G3DSA:1.20.1250.20 (GENE3D); IPR005828 (PFAM); PTHR23500 (PANTHER); PTHR23500:SF208 (PANTHER); IPR020846 (PROSITE_PROFILES); IPR020846 (CDD); IPR020846 (SUPERFAMILY)	C:GO:0016021; F:GO:0022857; P:GO:0055085	C:integral component of membrane; F:transmembrane transporter activity; P:transmembrane transport
	FPIN_6_gene_2.27	glycoside hydrolase	LISPYETPDSDDKSVYTDRDYPWGLLWNTRDLSPGTYRLKAVAKNSCGGSTSLTQDVNVQAPLIKAEANGSVITSGLLPEISPSIEGINLRDTTVTLGSDGTYYLSGTGADNDAWVHNEGINLWKSTDLKTWHYVGLIWSFERDGSEDENTWWWYKDEHLFRAVWAPEFQYLNGNFYIVYSLQSKGSKLFVSATKKPEGPYKVAGGEDTILFNNIDGSLFTSITDSRSGYLCYENGHVVKMNSGWNATVGDVTRMNVGDEGCFVFQWKDKYYMSVAKFMAAGGRYSSYVGIASHPLGPYSQFHEAIPCGGHNTFFKDKCGSLWDTFFGNDKEAPWREKPAIVRMATRSDGTLYPDENQAVEEC	complement 284323..285495				0	P:GO:0005975; F:GO:0016798	P:carbohydrate metabolic process; F:hydrolase activity, acting on glycosyl bonds			IPR013783 (G3DSA:2.60.40.GENE3D); IPR023296 (G3DSA:2.115.10.GENE3D); IPR006710 (PFAM); PTHR42812 (PANTHER); PTHR42812:SF5 (PANTHER); IPR023296 (SUPERFAMILY)	F:GO:0004553; P:GO:0005975	F:hydrolase activity, hydrolyzing O-glycosyl compounds; P:carbohydrate metabolic process
	FPIN_6_gene_3.0	Transcriptional activator	MTKGLSVRQYRAGSIGDAGKPPCAKCLREGAECILADSRRGGDYSHHRRSRQTTQGYRGKTAGSVSSSDHFSPQQKAIAKPRESNVHDKLQNPSDALLVLAHAAGEPEDEHGLDADLHASNEYESQVNGTEASLSTITMQIARPGHLQLDMASEATVNDYALVKDGTLDLVIIIQLLRHYAESFHCFFPIVPKDVLKPECILETIKTETLLLTAILIIASRDRPDLAATHKSIWEYMRGLILNVVLGKASVRQVGTVEGLLLMGEWTLHNRTQVDCGDEAAAWSIVGLAVRLAYLLRLEDSGFKGEDVELDSVHRERLAWTFTYLSDRQISIRMGQAFWCRGPALSARFTARDFPALQPKRSDDDDFASFIQAQVELTTLFGNAHDILFASRSRTAELM…	291448..293786				0	F:GO:0003677; F:GO:0003700; F:GO:0003700; C:GO:0005634; P:GO:0009058; F:GO:0016491; P:GO:0034641; F:GO:0043167	F:DNA binding; F:DNA-binding transcription factor activity; F:DNA-binding transcription factor activity; C:nucleus; P:biosynthetic process; F:oxidoreductase activity; P:cellular nitrogen compound metabolic process; F:ion binding			IPR007219 (SMART); IPR007219 (PFAM); mobidb-lite (MOBIDB_LITE); PTHR31644 (PANTHER); PTHR31644:SF4 (PANTHER); cd12148 (CDD)	F:GO:0003677; C:GO:0005634; P:GO:0006351; F:GO:0008270	F:DNA binding; C:nucleus; P:transcription, DNA-templated; F:zinc ion binding
	FPIN_6_gene_3.142	phytanoyl- hydroxylase	MAPSRTEILPAEEPATLSADKSKMLNEAPQDPYGHYFPAHPATLSLESNYGPMEPDTIGYLQPTTKDTPIEVMHERFERDGYLFVKGCIKKETSLNCRRDYFTHMAPSGLLQEGIDPVDGIYSGADTRKYLPPGNLRRLFGLKDDPDSERYVDLMISAHEASFYVEFCKNTQLHDFVRQFTGWKNPQMLQRTMLRAFVPNSELTPVHFDQMYLRAGPPTSLTAWIPIGDVSLEGGGLMYLQGSTDIGKKTEDDFAKKAYNLTDEERVSAFNKNMNDGGFLSRDTVAYGKEKQRKWLVAEYEAGDVIFHNPYMVHASCKNRDPGNKIRLATDVRFVDPEKPYDTRWMKVYRPLDGL	complement 289391..290578				0	F:GO:0003674; C:GO:0005575; P:GO:0008150	F:molecular_function; C:cellular_component; P:biological_process			G3DSA:2.60.120.620 (GENE3D); IPR008775 (PFAM); PTHR40128 (PANTHER); SSF51197 (SUPERFAMILY)	no GO terms	no GO terms
	FPIN_6_gene_3.30	amidohydrolase 2	MTGTIAIEETIINPKYLYTVEKYIPLLSHYANLGSSVKDGLLDIHEKRLDSMNKHGVEYMVLSITSAGSQDEADPALAEKMAYDNNNFLAAEVKKNPQRFGAFEALSMHNVHQAVAELKRAIQDLGFLGVLLNDWQTTKGEDGSEIRKYYDTPEYDPFWAAIQELDVPMYLNPRYPLPETLTEPWESRSHLLGASVGFSLDLSFHLYAISSSGTLDRFPNVKIISGHLGEGIPFNLWRASYWYDHMRGTSARKSQHNYAYYWRKNFYVTTAGTYTTPGLKLAIGELGIDRCLYSIDTPYNNIEEAQAWWKDVDLTPTDKILVGWDNAIKLLKLPLELKSSQN	complement 329064..330241				2.77532e-127	F:GO:0016787	F:hydrolase activity			IPR006680 (PFAM); G3DSA:3.20.20.140 (GENE3D); PTHR21240 (PANTHER); IPR032466 (SUPERFAMILY)	F:GO:0016787	F:hydrolase activity
	FPIN_6_gene_43.117	uncharacterized protein FPRO_13834	MSSILIAPYNDSMRLGQGYNSFLHRPCVLNAVKLTQSKAETTVKRQENTSQVVDYSSRFVEKISEVAKSMNVSAGSSIKNGGIIGSGSSVTLDEAKFTESDLNAVVSVKVINQTTELLGDVKFEDPGLELTNDQFFDTYGNCYISGFIEGGELIGVVSMKVMDVQNKTKIKQAIKGLVNSSGTQSEFILEENGTNKGYSAAMSKTETTITVSWSGGGQIKAENQGWTLDSLMSAAAAFPANVARCPQKTWAILTPYYHSKSFLEWSKGNSIKVPQFDGALVYANTLLDMYMEYKTLVGRIQAVLSNPIDYIPTTADNPIRVNIQELLSVRKEMNQEMKKITKTVDLISRKPEDVEEIELAAEILEPEIYATRIPIHRPNQENSDEWTTARAADILSGFS…	4331137..4333195				8.04683e-145					Coil (COILS); G3DSA:2.100.10.30 (GENE3D); mobidb-lite (MOBIDB_LITE); IPR001229 (SUPERFAMILY)	no GO terms	no GO terms
	FPIN_6_gene_43.137	Sphingoid long-chain base transporter RSB1	MATFDRNLCTLATCSVEKFGWYHYIPNLGANAFYLAVFAIFAIIQLYLAIRYRVWGTFALGLVLGCVTEAIGYAGRVMQARGDGIFKKKYFVIQLVCLTIAPALISAPIYLSLGRVVKAYGRQFSLMSPRTYAVIFICSDVVSLILQAMGGGLAATGKTQKKVDTGVHILVAGLAYQVLSLAVFIGLATHLWSRVRRMGTKDANPRFTELRASRQLKSFIWALSIATITITIRCIYRVVELSGGFKSEAANDEPSLMVLDGPMIMAALLALTVCHPGPLFFGDWKRLGQDSGYPETGEEIDQVKQDIERK	complement 4316725..4317764				0	C:GO:0005575; P:GO:0006950	C:cellular_component; P:response to stress			IPR007568 (PFAM); PTHR31465:SF24 (PANTHER); PTHR31465 (PANTHER)	P:GO:0006950; C:GO:0016021	P:response to stress; C:integral component of membrane
	FPIN_6_gene_43.76	---NA---	MPVDNISGSSLAAHKEKSLIELIASYHTPLVDTTAVFAFLSDRMRAHVYVLEAKQLFEIMTKTKIEEIPAFGIVDLRDSHHPTKFKTAISMPFEDVEEVSALIEIKGSEA	4334450..4334782				-					no IPS match	no IPS match	no IPS match
	FPIN_6_gene_44.108	hypothetical protein FOCG_00001	MLLPTIASLASWATVVSACGLSIPSAIHLMTRGDTPLLGKRATDFDPLHPVNQNTEIHWTVPENERQMQISDDAFIAKDFAHFNHHPNSTMYYPGGVVMNLTEHIEDLRLYFSTYPDAAPHNHNYKLIFGEGDWTVAISVSSAINGGAVSDLSGNWLPPTMKPVKFDLMTIARWDGGWMMEEYLWVDSPIMFRQMGILPIPPADDLPDIELNPYTAPLSTKPGVDNAKANKVTMTASDNAFNAGAFTADALHLSQDVKVYGLTDQPLDLKGYLATLKSLKKTFPDLHLENAPYKHIIAQGDWTATVAMLSGTFKGPLELPPYLGSSPAKPNGRKFDILHYTICRWQNGKIVEMRVNADIFGIVGTLGIQPQ	complement 4400956..4402137				0					G3DSA:3.10.450.50 (GENE3D); IPR009959 (PFAM); G3DSA:3.10.450.50 (GENE3D); PTHR38436 (PANTHER); IPR032710 (SUPERFAMILY); IPR032710 (SUPERFAMILY)	no GO terms	no GO terms
	FPIN_7_gene_1.132	C6 zinc finger domain-containing	MVNAGRRTKSCSMCRERRVKRCTQAGRPCPGYPESWDVMLRMQNKYAENKVQTRVQKVKTERMEQARREAATVPRGVHISAEVHSWNRFYRDYAMHSGITLFNVLPRFYTNSSSTCFQEALHAVALVSSARQLQQSGLMVLARRHYGEAITALNVALDDTVLTADDSVLVALLLLSLFEMIVPECFRKDADFQCHIHFRGALLLLRWRTERARNSELDESCFMFLSHICLMSMFLNNEPFDVKWLALERFAAPWIKGPLLEPILARVVDFKRRACAQATIGHYSFRTEVIQLIKDGIAICEDLDATAASVKSSSNPDLPSHQQPTAFNNMFEVSTKTTEAIARSLYQTVRYHVVELVSSLVDFVEEDGGTRHELDYQFNPSMRYMVLEQRQTGQELLTE…	complement 168135..169647				0	F:GO:0003700; F:GO:0003700; C:GO:0005634; P:GO:0009058; P:GO:0034641; F:GO:0043167	F:DNA-binding transcription factor activity; F:DNA-binding transcription factor activity; C:nucleus; P:biosynthetic process; P:cellular nitrogen compound metabolic process; F:ion binding			IPR021858 (PFAM); PTHR38791 (PANTHER)	no GO terms	no GO terms
	FPIN_7_gene_29.6	hypothetical protein FVEG_17053	KFQIAKTGELAEIGGRGVVLGIGASCGRWLCHGNAVLWPPRRFRCSRLNSGATGITKMVSLSCQDTVELCVDCPRGGRELAVLSLDHAGVLARYCAWPRRTAVPG	2912816..2913161				4.83026e-33					no IPS match	no IPS match	no IPS match
	FPIN_7_gene_3.73	uncharacterized protein FFUJ_09045	MVTMEPSQTNAAESPASANGGTVDIECNPSPTPGESRAPALSLPPGIAESLGLEPPTALSGRALETRLASLDKSLNCKEEEVAFAYGALDGAKARCDQLAVDIEKLKAENAQVGREKQIPETKIEALEAEVWQQKEVLERLREVLKRHRLW	364560..365377				2.65591e-07					Coil (COILS); Coil (COILS); G3DSA:1.20.5.170 (GENE3D); mobidb-lite (MOBIDB_LITE); IPR032038 (SUPERFAMILY)	no GO terms	no GO terms
	FPIN_7_gene_3.77	uncharacterized protein FPRN_09976	MAPTRQEKKQHNRQGYEQRVARKAKSVQSGSGRGTIGPRQNRDSGSYAQTMAERHGITKIQRRDQTEEDDDRLVTVKEEEGQRYEGAEDLPTQFVKREHTTQVAQAARAAEALFGRPTPIPAYKSYDSDRMAIAKAKRHRYDLARSTSTVIPSTVTPLRPPREGITAASEARTTCPQGENVSQAAQAVRAAQTLFRTPTIIPARMSYRPNRAHAEAQAKAKKARYDAVMSASVVTPMRMRDQGIPRQDDSRPAACNYHLSKHKPGLGASSFSDEEE	388496..389326				2.59082e-39	F:GO:0003676; F:GO:0008270	F:nucleic acid binding; F:zinc ion binding			mobidb-lite (MOBIDB_LITE); mobidb-lite (MOBIDB_LITE)	no GO terms	no GO terms
	FPIN_7_gene_3.82	Uncharacterized protein LW93_5114	MSDNFASEKETARERYFLSTQDVARTDGHGRASGAGQDNISPDMDQDTNKSTLILAERHEIQRSQRSHHGRPARRTKPDRMAQAKAMKIEYDILMSENNSRLRRPVDLRHPAESKPCANCGGGGHQLADCITTVHGYIKACVFFETDNHRTDDCNSFKKLSLEDKVKLLVTERAGKPALAQWWTLLYEFLEAKETRDIPPPTGFPWTVKFAVEVFGGKHGNPVYEIQREFDATHNPNVLPVDTTAHRSPMSEATTGFLNAAPFLFALIFLNFEENMA	complement 325951..326784				8.44503e-98	F:GO:0003674	F:molecular_function			IPR001878 (G3DSA:4.10.60.GENE3D); mobidb-lite (MOBIDB_LITE); IPR001878 (SUPERFAMILY)	F:GO:0003676; F:GO:0008270	F:nucleic acid binding; F:zinc ion binding
	FPIN_8_gene_2.38	MFS efflux	MATTQNISGNAPSFTVLDPVVIRLVHDDIEELPRPTETEIGLHTFSDKPAEPEPGVEFIERVPSIWDPMNKMRLFAVCLASFGNGFNDAGAGAVIPYVETHYSIGYAMVSLIFVGQALGFMFAAIFLDDLRAILGRAKVFGLANIVLVCGYIPIVTTAPFPLIPIAFCLVGFGAAVNIALGNLFCGGLPNGTVILGLLHGCYGFGGTISPLIATAIVSANGTAWSRFYFINLCFAVLVFSLTVWSFWGYEKELSAAIRESEKPKEQSTLHAVLLTLRMNIVLLGAVFIFAYQGAEVSISGWVISFLIDTRGGSPKSIGYVTAGFWGGITIGRFVLSGFGQRWGEKPFVYGFTVVAFAFQLLIWLVPNIIGSSIATAIVGLVLGPIYPYGAALFIRSMTK…	238837..240283				6.74195e-178	C:GO:0005575	C:cellular_component			G3DSA:1.20.1250.20 (GENE3D); G3DSA:1.20.1250.20 (GENE3D); IPR011701 (PFAM); PTHR23514 (PANTHER); PTHR23514:SF15 (PANTHER); IPR020846 (PROSITE_PROFILES); IPR020846 (CDD); IPR020846 (SUPERFAMILY)	C:GO:0016021; P:GO:0055085	C:integral component of membrane; P:transmembrane transport
	FPIN_8_gene_24.107	hypothetical protein FOCG_15334	MALDYSTIALQAVNSSIQSFKDHGYTMRPLFRAICMIVDDQSLASYTKTPHVPERGIKIGWSFVASFAPTKSQAIFFTRDDSHLSSPMTFLPLFDAGLALTVNREDYHREEEPKIVRVKLDDAIWGSSYNGCNKKNNDLTENLRHEQDMHCQAWV	2418737..2419234				1.08405e-38					no IPS match	no IPS match	no IPS match
	FPIN_8_gene_31.83	uncharacterized protein FFUJ_12560	MKLSTILAFGALLLGDVSVAQDYQFRPELLENNTTWPLRGALIKAPDTPTNTTLNESCPMPRESLMGKLTSWMIGDSKHKCAQFDIAPGETLSGFPLFPTRQVHAFTFTNNSYFLHAALPGSERLFEVMKKNIWTKIPGGMTVTCYEGNEGLPHCVYRT	complement 3131561..3132040				2.88857e-73					Coil (COILS)	no GO terms	no GO terms
	FPIN_8_gene_32.145	DAL5-allantoate and ureidosuccinate permease	MSDTPKPIVESPPSVEAIEDSELKGGRTEMDVHDRENAVGYSEYLEARDIEFSDAEVISTRLGCTTAFTNRITGKETTMEARSRYPPYVPRYPSASVHGQDLSQLCQPLRISGGSRSQGQPIQLPLCKDTVVYAGYFFGQYPCGWLIGRFPAQKVMAISVFLWGLMVIIMTQSRDYSSALAVRFIMGVFEAAVTPGLTLMTGFWYTRREIPLRQCIWYSSLGWGGIVGSYISMGVSKLPVDLKPERWELIFFILGGATCLWAFVIWFLLPDSPSNARFLNHRERLIAVKRVASNETGIKNKAFDKDQVVLGFTDPKTLLLFTSVFAAAIPNGVVNSFSTIIIRDMGFSTTRTTQLKSVGDAVQIIGLIIGGSIILNVPNSRLLTATVANMLCTISAACM…	3213688..3215657				0	C:GO:0005575; P:GO:0055085	C:cellular_component; P:transmembrane transport			G3DSA:1.20.1250.20 (GENE3D); G3DSA:1.20.1250.20 (GENE3D); IPR011701 (PFAM); PTHR43791:SF42 (PANTHER); PTHR43791 (PANTHER); IPR020846 (CDD); IPR020846 (SUPERFAMILY)	C:GO:0016021; P:GO:0055085	C:integral component of membrane; P:transmembrane transport
	FPIN_8_gene_32.29	related to short-chain alcohol dehydrogenase	MAPPRAFDFSGDVAIVTGAGSRMDGEIGNGRAAAILLARHGAKVALVDFNVDWAKETKRMIDEEGGISEVIQADVTSEESCRNAIDKTVELWGALHILVNIVGVGGAMGDATSINLDAWDRDFRINVTSMVMMSRYAIPEMRKQGRGSIINMSSVSGLLGGNPSLLYPTTKGAIIQMTRAMAAHHGRENIRVNCVAPGMVYTPMTRGRGMTDEMRQARINQNLMKKEGTGWDVGYAILFLASKEAGWITGLIMPVDGGTTAGKADRPALKADTLAEANTGIQN	complement 3210424..3211554				0	F:GO:0016491	F:oxidoreductase activity			IPR002347 (PRINTS); IPR002347 (PRINTS); PF13561 (PFAM); G3DSA:3.40.50.720 (GENE3D); PTHR24322 (PANTHER); PTHR24322:SF699 (PANTHER); IPR020904 (PROSITE_PATTERNS); cd05233 (CDD); IPR016040 (SUPERFAMILY)	F:GO:0016491	F:oxidoreductase activity
	FPIN_8_gene_32.30	related to dienelactone hydrolase	MGQSSSQQTVSEPYLAKPSGSCCLKGTIHEGESRGTWETIADVETYISKPAPEKANGNILLYFPDVWGMFPNGLLVMDAFADAGYLVLGLDYFRGDPVWKHRKDRHTQNPDFDYEAWKRKHTAFADVAVPKWVAAVKKSYGTKTTKFACVGYCFGAPYVCNELKGDTVTVGAFAHPAFLKEHHFTELKKPLFLSCSEVDHTFDVPSRRRALDILQTNKKIFHYQVFSGVEHGFALRGDPKDPYQRWVKEQSLAGIVAWFDYWLSQ	complement 3212293..3213248				0	F:GO:0003674	F:molecular_function			IPR002925 (PFAM); IPR029058 (G3DSA:3.40.50.GENE3D); PTHR17630:SF64 (PANTHER); PTHR17630 (PANTHER); IPR029058 (SUPERFAMILY)	F:GO:0016787	F:hydrolase activity
	FPIN_8_gene_32.5	related to muconate cycloisomerase I	MPAIEFGNSYGSSVHHLLSGSYTNKTLFLLAFDTIAKTLTLNATVPGFGLHQFVTSNAAKDRVYATAMSEPPQLFSWSVDENYQFTHLDTVNITSSSCYFSDDGNLAFSSGGSTAAIHALTENGAIGEQVQELYMVPEEEIKNVNKTRAAVLYGAHAFDINVNRKGFVPHLGMNSIFMYDIAENGTATPLSINLSPTEGDGPRNSYSSKDGKLLYVMTEHNQWVDVYRVLDTRLEHIQRASAIPDDVRGVYTFRSNTVQMSRDGKYLFTSTRSWNNTEANGYVAAFALNDEGILKSEKAVAFYEAPVTLGSAGGLRVAPWQDETNCDPNGITDYMYLSDTSEGWMFILGWTPSNHTLDVVASLHYPDNSTPYEATWLD	3204818..3206264				0	F:GO:0016853	F:isomerase activity			IPR019405 (PFAM); IPR015943 (G3DSA:2.130.10.GENE3D); PTHR30344:SF8 (PANTHER); PTHR30344 (PANTHER); SSF75011 (SUPERFAMILY)	F:GO:0005515	F:protein binding
	FPIN_8_gene_32.6	Nitrogen assimilation transcription factor nit-4	METNDEQGQGQSSARSKKQRMSRKYRGLTCANCRAKKVTISSVRCEGSQPTCKTCEVYHVECRYDKPPPLSQVVAMARKLQEAEETIERLQGGDGSITQQNMRASTSESVAPASSSFVPEDLSTRGPLSSGHNIESAVLDKSPATNQSRLRDPPQPAAAIDGTSQDGLAIDLSVDEHGKICYYGPTSAVHEPLGLASPSTNSISRGDGSKRTDVRAYLVSRARESTIWEEFALGNASLQLGLPRTVMAKLLHLHWTWVAPMFMWVYRPAFMRDMTTGGRYYSELLLLVLCAHASKYYDTSHAQLLFSRVRFLLGDEIQKPSSIPTIQALLQLSARELAQGSISQAWLYSGMAFRMSADLGLQHNGPDIADLKGLDPVDLEIRKRLFWSCYFWDKAISLY…	3207797..3210179				0	F:GO:0003677; F:GO:0003700; F:GO:0003700; C:GO:0005634; P:GO:0009058; P:GO:0034641; F:GO:0043167	F:DNA binding; F:DNA-binding transcription factor activity; F:DNA-binding transcription factor activity; C:nucleus; P:biosynthetic process; P:cellular nitrogen compound metabolic process; F:ion binding			Coil (COILS); IPR001138 (SMART); IPR007219 (SMART); IPR001138 (G3DSA:4.10.240.GENE3D); IPR007219 (PFAM); IPR001138 (PFAM); mobidb-lite (MOBIDB_LITE); mobidb-lite (MOBIDB_LITE); PTHR31313:SF51 (PANTHER); PTHR31313 (PANTHER); cd12148 (CDD); IPR001138 (CDD)	F:GO:0000981; F:GO:0003677; C:GO:0005634; P:GO:0006351; P:GO:0006355; F:GO:0008270	F:DNA-binding transcription factor activity, RNA polymerase II-specific; F:DNA binding; C:nucleus; P:transcription, DNA-templated; P:regulation of transcription, DNA-templated; F:zinc ion binding
	FPIN_8_gene_4.17	hypothetical protein FVEG_07630	MEIGKDMRHDESVYVRDVVRLLRRQFPPPAEACDVGYQTQHLDCLIVLLRYINSHMTQYYLPILEEHCAQEAQNPILALSWLDINPDAKLAWIEAKRNILSALGPMGDDERNPSFGDLLHSDIMMKTFWSRQEFKLMRGIMIKPAGGSWDMPADNPDLEKNFLYVASSRFPELSFQDRIFKFFQLSRRLADDSLFIRLCARPNILRVTYERQSGFPPYPFSTMKNIKIPIADVKDSKPTKERDHDVVVYTLLAVVSHKDAMIRLYQPMAPQVFFNTTHPAIGPKRWSLEDPEHGIFDLIYAYVGHVEILDRAGEFAVTRELPEAFKEVYKQFQGGIVRFHRAREGGA	462181..463224				1.83252e-34					no IPS match	no IPS match	no IPS match
	FPIN_8_gene_4.75	phytanoyl- dioxygenase family	MESMPEAPNSVIINRETGAAKRLGEKAPVTAHLQKLIDDTLSNGYVIIPNAFTNTQIEEANTELRRLASSPEAGPAVSGGRNRFEGLRTNRIYALLNKSRVFDKFVLHPDILGLNEYFLDQGFLLNAFHSINIQPGEAPQTIHHDDGFITIPRPHRPFGTAVMVALDSYTETNGATVVVPKSHTWDSSHVPTPEEAQPVIMEKGSMVYFLGTLWHGGGKNVSDKERRALTVQYCQPWVRPLENQILAVDWEKLNGIPPRLVDMLGYQVGAPFVGYVDGISPRRAVERKMREKHAVNRYNTKL	449533..450487				0	F:GO:0051213; P:GO:0055114	F:dioxygenase activity; P:oxidation-reduction process			G3DSA:2.60.120.620 (GENE3D); IPR008775 (PFAM); PTHR20883:SF23 (PANTHER); PTHR20883 (PANTHER); SSF51197 (SUPERFAMILY)	no GO terms	no GO terms
	FPIN_8_gene_4.91	uncharacterized protein FMAN_10938	MTIPEAHSIMMQLQELEFPYAFMKARTISLLKAGGIPTMSKLFAVTGQNNARNGGKRVVDTEILIREVQHNSRLSSRYQTAVARMNYLHSRYRQAGKILDEDLLHTLGSSVVEIFRILESEEWRPLSDVEKCAIGVVHMALGHDMEIPFKPLPSSSTGWKDGIHFSTELRDWTLRYEANVALPTEANDRYVRVYVDGLFPRLTPRLTILLRKIIGFELGDVMRESLGLPRPAFLASKAIAESPNPDTGLYNLTHFSAEPWYTKPGWWTNYGPSAQIIRVLGGKIPESASGKFKPQGYDLTTIGPQPQEGKGIDAMAATISGFESQDSTTCPFKSYKS	complement 447216..448439				0	F:GO:0003674; C:GO:0005575; P:GO:0008150; C:GO:0016020; C:GO:0016021	F:molecular_function; C:cellular_component; P:biological_process; C:membrane; C:integral component of membrane			PTHR36124:SF3 (PANTHER); PTHR36124 (PANTHER)	no GO terms	no GO terms
	FPIN_9_gene_10.0	---NA---	MVPKKQFYILETRKSGSHPQFCQRKSWHAHGFLGQAVAVDATMQDRPPIHVEMFMDGRERMDSREVRGVSVETRGLKMPRPEEFRDLV	994500..994771				-					no IPS match	no IPS match	no IPS match
	FPIN_9_gene_22.77	---NA---	MSQTARAPADKVRLRRSRIHSDFIKPSSSRDPCPAPSLSLAAISVAGSVTGLYEKGVTVDNFIPAHHNAGQAALSVRSGRTDKIAQDKNERRSVTLLIKGYWIMDHQKPHL	2252851..2253186				-					no IPS match	no IPS match	no IPS match
	FPIN_9_gene_4.44	uncharacterized protein FPRO_12782	MGPSFHTSDPRYLVKLHEHHRQNPLTAKAFNDEEVLAPEEQRFYSVYGPSLTAGRRIIKATQDAVDPEGNTFTLSNSQTFKVVAPRFNLPQSDVHSFYPPSGGTVPLKMLPHIVFKDPHLPWERQVGSSTPPKDGSERTRIPWLALWVFRPDELVSPGTGIFAGKALSSTRATRLKVSDVIQAGSSDICTPYKHDEASPDEEDSEVDFICVNRQLFQALCQSYKSDGSSTGDTDLTSYGYLAHVRKVGSEALRAAAASVTNDCFSVVIANRTGSSQNQDPSSLGAVAHLVSLEGIGPSFKPSSDDELVTVCSLFSWTFHYTIQDDQAEFENALKAIGKPTSGLEWLRPSQDRYAGLLSAQEVEKQCVGKRIRDGYSLTRYRTLSGEETLSLQRGALIPS…	412683..415982				0					mobidb-lite (MOBIDB_LITE)	no GO terms	no GO terms
	FPIN_9_gene_4.55	uncharacterized protein FPRO_12781	MPGNPPPPSPAQDDDIYTIHVNLPSCYLKPAGSVEPQLPDGTFSFDAQEDHWKSSPHDPKRQEFRIQGKNEFVFIAGAQYTYKPNTSLRIKCKKATFMPHPTDPSQKSVIVRMPGADAEQNLLAKAEEGKSGFDAKYRLESSGEAFTWNRFIDVVNSADYATKGGDGMGGAIGSPGEDAGSLTIEADSYDTSALPDDNVFFIADCTGGRGQQGGHGGDGGSGGHGSIAAGINHGDRREDRSLGGRYGAKGGDGGRQGAGGYGGSGGKFTVNLRKESAGNDKLKARFGVQSNVGAPGSAGATGNPGPGGGCGECWMFKCAPNQWSMVEFPMNGISKDNLMAELRSKLELDWSSEDVNQWATGYISQTELYSVNGDVPNALDEEEIQSRRARAGQRTPTTS…	complement 416027..417253				1.26935e-170					mobidb-lite (MOBIDB_LITE); mobidb-lite (MOBIDB_LITE); mobidb-lite (MOBIDB_LITE)	no GO terms	no GO terms
	FPIN_9_gene_7.47	uncharacterized protein FPRN_12312	MCIFSPPTGESSGHRSSAAQYIHYSPVDAMHRTSTFTFTLISTLDATPPASGATPMIICMRGLMTVIRAAYYEATPTLPLGLISREKKKKKKKKKQPNHIWHEKES	complement 715248..715568				3.00899e-39					mobidb-lite (MOBIDB_LITE)	no GO terms	no GO terms
	FPIN_10_gene_18.17	transcriptional regulatory	MYEARYRELDELCQKLQVVAAQLTKAIDRLPQGGCTDACSHVSSSASPNQRLLPQQGKVLATTGTATDSGSNGHSQPRPSDADEQNTDQSQEQVNNSGEFGTQAFGSLVHDSYGALRSVLESSACGTC	1836481..1836867				5.49091e-59	P:GO:0009058; P:GO:0034641; F:GO:0043167	P:biosynthetic process; P:cellular nitrogen compound metabolic process; F:ion binding			mobidb-lite (MOBIDB_LITE)	no GO terms	no GO terms
	FPIN_10_gene_18.66	hypothetical protein AU210_013260	MQAIQTGSSRRGYFIMSQGKLTSDSKRWETVKNEAKKYGEGITGTRSGATTGPNVIQSMPETYQPPHRGRGEGSNQNQMGISPGDAKQNQKRSGHKVSRAELRPDHPDLSQESIPRNLSITTSPNTGFASSPTLPAIAGAIDTAAPGQAKINSGIEVSNTTAAWIFGAVAAVTNGVTALATRQTAKASKRSAIAGEVAANASKRSAKAAEETCLIAQKHFEATFKDNKDRPPSPDTSQNISGAGVVAPSGKEQKSDTRSRTVVTQGTGTEASPLKAPRAVLSPGLPEPPGRGRVLRTMSNPPPGRREENCISLNRPTAKAEPIIIWPEVPTCEFGKPCNCQIIPKY	complement 1863048..1864176				8.00013e-164					mobidb-lite (MOBIDB_LITE); mobidb-lite (MOBIDB_LITE)	no GO terms	no GO terms
	FPIN_10_gene_26.106	related to C6 zink-finger PRO1A	MDGGTKQDEMTNNIKLEIKARSRRSNPRQVNRAEYKTTSPSDITVFRSSDPISGLGDDIIAPSDPADSVISATEWLPSPESGSVGSLSSTQVEPRAAHTPPLDPISTTFYLDHVFSYLYPFYQPSSQRGGRSWILELLMTSSAFQQIVLSYSTYYYDLAAPQNGRTQVDKLHQAESSVASLSQSMQTLLGVGSLDGHTHCACRVLTSIVQHHRYEITTANSNWKIHFDGALALFTRLLDRYSSAAESLHHSSTSAGFNAIVHDLNVPRQEAFVFSVGLMIFDDIVAGASSNQEPQLSQYHQHLLGGDDPALELEVIIGVKSCILRLLGQVASLNAKKQQDQAAGNLDGLELAQRASTIMESLTASIEQLQESSSPSSNSQSGERDYLEEFRAHYDSRGT…	complement 2668878..2670482				0	F:GO:0000981; C:GO:0005634; P:GO:0006355; P:GO:0006357; F:GO:0008270	F:DNA-binding transcription factor activity, RNA polymerase II-specific; C:nucleus; P:regulation of transcription, DNA-templated; P:regulation of transcription by RNA polymerase II; F:zinc ion binding			Coil (COILS); IPR021858 (PFAM); mobidb-lite (MOBIDB_LITE); mobidb-lite (MOBIDB_LITE)	no GO terms	no GO terms
	FPIN_10_gene_26.20	Short-chain dehydrogenase reductase SDR	MASTLVALILGAGPRVGAAVAKEFSKTGYKVALVSKSGSDSITSEGYLSLKADLADLNTIPGIFQKVYNKWKASPSVVIWNAGARTVPSVEDDMFSLAQETLVQDININTLGPYVAAEQAVNGWKDLAEGAKKTFIYTGNKMNIQPLPVPATATLGMGKSASSYWISLADTLYKGKGARFFYADQRQADGNMGGMGLDGGAHGQFFVQLAQQGKDIPWLATFVPGTGYVKF	2672527..2673278				2.46289e-150					G3DSA:3.40.50.720 (GENE3D); IPR002347 (PFAM); PTHR43669:SF3 (PANTHER); PTHR43669 (PANTHER); IPR016040 (SUPERFAMILY)	no GO terms	no GO terms
	FPIN_10_gene_5.55	hypothetical protein FOC1_g10008837	MSDQTPCAILPESIDIPRITSTKQESTLNYYGLFDASLATEASKFLALHTDAVEQELEPKIKVFLETTHNDCSGNIEEKKACWLTIRITKPSTAFKIPRWHQDGPMFKYDQGREDIVRSKYALTLLGPSTLMLQPNEHVFTTQNEAEARYYWWQDKTDGPEPSEDEMYDADDLLRQSLGNAFKDTPRVQVGHGQIVRFSWGRDDSPVHSEPDLVSDRVFMTVLYGSDSELRTMSKWREAPYGEYSVE	complement 513059..513802				2.87641e-165					no IPS match	no IPS match	no IPS match
	FPIN_11_gene_19.59	thioredoxin 1	MPITTIHSQSEYHDLIKRHRFVILFATATWCKPCQSIKIVYEKNANASDYDPEKLVFAQFDTDELPALDAELKIRQVPEFFVTENAEQVKQLTGANPLALTDLINAYVEWAKC	1964214..1964555				2.74388e-48	C:GO:0005623; F:GO:0016491; P:GO:0042592; P:GO:0044281	C:cell; F:oxidoreductase activity; P:homeostatic process; P:small molecule metabolic process			G3DSA:3.40.30.10 (GENE3D); IPR013766 (PFAM); PTHR10438:SF333 (PANTHER); IPR005746 (PANTHER); IPR013766 (PROSITE_PROFILES); cd02947 (CDD); IPR012336 (SUPERFAMILY)	P:GO:0006662; F:GO:0015035; P:GO:0045454	P:glycerol ether metabolic process; F:protein disulfide oxidoreductase activity; P:cell redox homeostasis
	FPIN_12_gene_2.11	cytochrome P450	LIPRLDAMSNSIAGMIFYLTHHAFARDRAASEVRHQFASAEDIRQGPGLAGCTYLEACILKFMRMAPPVATCPLERVTVGNGIEIDEDWFSAGITVGIYFYALNFNEAIHKYPYHFWPERWLSSEDGVTNGFIAEDVQRSESNFFPFSAEHRQCRAYTLASRNLKAFVADMLWHFDFRPATNLTVDESSGEEGQTGLFCIEDALIDIVHGLVLEFELRLGGNGSSS	219214..219956				8.83085e-64	F:GO:0004497; F:GO:0005506; C:GO:0016020; C:GO:0016021; F:GO:0016491; F:GO:0016705; F:GO:0020037; F:GO:0046872; P:GO:0055114	F:monooxygenase activity; F:iron ion binding; C:membrane; C:integral component of membrane; F:oxidoreductase activity; F:oxidoreductase activity, acting on paired donors, with incorporation or reduction of molecular oxygen; F:heme binding; F:metal ion binding; P:oxidation-reduction process			IPR002401 (PRINTS); G3DSA:1.10.630.10 (GENE3D); IPR001128 (PFAM); PTHR24305:SF144 (PANTHER); PTHR24305 (PANTHER); IPR001128 (SUPERFAMILY)	F:GO:0005506; F:GO:0016705; F:GO:0020037; P:GO:0055114	F:iron ion binding; F:oxidoreductase activity, acting on paired donors, with incorporation or reduction of molecular oxygen; F:heme binding; P:oxidation-reduction process
	FPIN_12_gene_2.12	anhydro-n-acetylmuramic acid kinase	MPYIIGLNSGSSFDGVDAVICTVELGPDGHPLRPKYIDALTVNWPEELQPLIFRAFNNDLTIFEMTRLKYAAGTVYAEAANALMKHVGLQPDDIDVIGYDGQTIYQEPPEREEEMAYLNSGNGSLVELWTKGDVDTVTQFRPVDHALGGNAGPLMQYLDFVSFRGEGTTITLSIGGIANLQVADADRTKIMAFDTGRGYDENGELAAKGHRNSAIAGAA	226731..227442	FPIN_12_gene_2.24	MFTATSIMRALTEFALLRTSVTRVIASGGGVRNLTLMKFLSLELDKQGIKLETSDVYGLPAAYREAIKFATLAFSCKRGIANNIPYAGGANKYAVLGKLTWAPRKAKHGGEVRDRNKRVLGPNGWEG	227573..227956	4.84741e-110	F:GO:0003674; P:GO:0008150	F:molecular_function; P:biological_process			G3DSA:3.30.420.40 (GENE3D); IPR005338 (PFAM); PTHR30605 (PANTHER)	F:GO:0005524; P:GO:0006040; P:GO:0009254; F:GO:0016773	F:ATP binding; P:amino sugar metabolic process; P:peptidoglycan turnover; F:phosphotransferase activity, alcohol group as acceptor
	1Values indicated after the 'FPIN_' are indicative of the pseudomolecule (1-12)
