# Supplementary material for: Characterization of Host-Specific Genes from Pine- and Grass-Associated Species of the <em>Fusarium Fujikuroi </em>Species Complex
Source: Preprints.org preprint supplement (doi:10.20944/preprints202207.0007.v1), 2022-07-01
Supplement: Supplementary file 5 [file Table S5.xlsx]

## Sheet: Table S5
Table S5. The Blast2GO data for the 47 unique Poaceae-host-associated genes specifically for (A) Fusarium konzum, (B) F. subglutinans and (C) F. temperatum.
A	SeqName1	Description	AA sequence	Location	Multiple copy gene	AA sequence (multiple copy gene)	Location (multiple copy gene)	Multiple copy gene	AA sequence (multiple copy gene)	Location (multiple copy gene)	E-value	GO IDs	GO Names	Enzyme Codes	Enzyme Names	InterPro IDs	InterPro GO IDs	InterPro GO Names
	FKON_144_gene_0.49	probable CYB2-lactate dehydrogenase cytochrome b2	MRISTIIASLAAAVSAYEPWLNEPDTGLNTYLASTNWTEGSRPLLKDIRGVPDFDFAARQVLTDQQYAFYRTAAAGEWAYRNNLKVWEKARLRPHQLASVKGLNETLGVTILGHNFSAPIFISPAARAGYGDSDRGELNFVDAAADEDILYVAALYATKTIEEIGAQRKKRGNTIFQQIYSNANLSVTWDAMKRAEDQGVKAFVWTIDAPATSTRHRAARYDTTNANGATSVLSWNLFKEIKSHTKLPIILKGITTTEDALRAVEAGADGIWLSNHGGRQVDYSPSPLEIAYELRRNAPEIFKKTEVIADSGVRYGSDVIKLLALGVKAVGLGRPFMYSNVYGVEGPKKLIQILKTEILADAAQIGITDLHNIPSKVLNTRALERDVYLMDEN	complement 15429..16759							0	F:GO:0016491; F:GO:0043167	F:oxidoreductase activity; F:ion binding			IPR000262 (PFAM); IPR013785 (G3DSA:3.20.20.GENE3D); IPR012133 (PIRSF); PTHR10578 (PANTHER); PTHR10578:SF97 (PANTHER); IPR008259 (PROSITE_PATTERNS); IPR012133 (PROSITE_PROFILES); SSF51395 (SUPERFAMILY)	F:GO:0003824; F:GO:0010181; F:GO:0016491; P:GO:0055114	F:catalytic activity; F:FMN binding; F:oxidoreductase activity; P:oxidation-reduction process
	FKON_1637_gene_0.9	lysr family regulatory	MSTTDIVLPLHEFDDSTINRYMQHWTLRFDAILDTEKLCTALTHLLSLGDWRKLGGRLEFNKVGKLEIHAPRTYSYERPAFQFSDEAFSVKTTDYPIAKHLPRAKGKPELFPGITSQFNPLTLGPD	complement 4965..5345							1.8408e-73					G3DSA:3.30.559.10 (GENE3D)	no GO terms	no GO terms
	FKON_1776_gene_0.12	Phosphatidylserine decarboxylase	MFTEVPPDYHNGTDPVGAPQIRDFATFIQVLNTIIVTGPEFFVVDDPDAMGLIGFPINAVLDWPMGTKSGWAFWYLPEVNQKSQPILQDFETFLASSASKVVLKAPNGWLGPKGQAMIVAKANLDGLTRTFTQIFDCPDPSDPIYLGFESWDEFFTRTFMPDLRPVVQPMNTSILNNSCESGPLQYKKNVKATDFFLLKGQPYSLNNMLNFNETYVKQFTNGSVYQAFVSALSYHRWNSPVNGTVVDIFNVPGTYYSESPFQGFPNPDSNGPNNSQPYISSVATRGIIYIQAEGLIGLMAIVYVGMAEVSSYQFTVTKGQTISKGDQLGMFHFGVSTHCMVFRPGVKLVFNQPPGEPQDDGTWDWSAKKNLPVNGALALVTDEP	1994..3148							0	F:GO:0004609; P:GO:0008654	F:phosphatidylserine decarboxylase activity; P:phospholipid biosynthetic process			IPR003817 (PFAM); IPR022237 (PFAM); IPR033177 (PANTHER); PTHR10067:SF8 (PANTHER)	F:GO:0004609; P:GO:0008654	F:phosphatidylserine decarboxylase activity; P:phospholipid biosynthetic process
	FKON_2165_gene_0.10	---NA---	MAVLTTSGTMFDLGYPSLTTPLKYIFDSSWHGKARFKPAGEQVLMSRPDSCIDMEALEAFPKITPNGA	complement 12214..12420												no IPS match	no IPS match	no IPS match
	FKON_2333_gene_0.6	---NA---	MNSFASWISALSTVGIGRLTKLNRSLSEERQASPPPRTVIDTPAAKPSGSHHGSINGGAIAIIRLPMHSVEKV	complement 3230..3451												mobidb-lite (MOBIDB_LITE)	no GO terms	no GO terms
	FKON_2386_gene_0.5	glutamate decarboxylase	MDPKSYQNPELLFEDLPTDALGKGMPALAVKSGIDRLLEHDIEPERNLGSFVSTGLNDIGESLLLENYQRNLACQGEYAGVRRQVNLRGEQMSKVLILHRIHERCVAILGALWGSSCNEKPTGSAVSGSSEAIFLGILAMKRKWQAENGGIVSPNGSTLNMITGSHAHVAVTNAARANDIEIRTVSVGPENNYSFDPSKIQGLLDNSTIGVVLTLGNTYTGHFDPIENTSIVLDNYEQSYGRSIPIHVDAASGGFVAPFNGGKSSRWDFALPRVVSINVSGHKFGLTAAALGWIIWRDRKFLPADLLHESSYLSGHHELPTLRYSQSSSNLLIQYYQLAHLGHQGFEIVIQDLLERSSALGKTLEETGMFTCISESHRTLANTLPVVVFRVNSAVQDQC…	5406..7030							0	F:GO:0003824; F:GO:0004351; F:GO:0005516; C:GO:0005737; P:GO:0006536; P:GO:0006538; F:GO:0016829; F:GO:0016831; P:GO:0019752; F:GO:0030170; P:GO:0034599	F:catalytic activity; F:glutamate decarboxylase activity; F:calmodulin binding; C:cytoplasm; P:glutamate metabolic process; P:glutamate catabolic process; F:lyase activity; F:carboxy-lyase activity; P:carboxylic acid metabolic process; F:pyridoxal phosphate binding; P:cellular response to oxidative stress			IPR015421 (G3DSA:3.40.640.GENE3D); IPR002129 (PFAM); IPR015422 (G3DSA:3.90.1150.GENE3D); PTHR43321:SF1 (PANTHER); IPR010107 (PANTHER); IPR015424 (SUPERFAMILY)	F:GO:0003824; F:GO:0004351; P:GO:0006536; F:GO:0016831; P:GO:0019752; F:GO:0030170	F:catalytic activity; F:glutamate decarboxylase activity; P:glutamate metabolic process; F:carboxy-lyase activity; P:carboxylic acid metabolic process; F:pyridoxal phosphate binding
	FKON_2386_gene_0.6	non-ribosomal peptide synthetase	MHFAKPDMTTSAESEDGLPWSCSADGPHSSDNHSVVSFHHREASITMENLNQFCKTHDTTPQSVYFTTWSIVLYHMTGQSDVSIDVESDSASALAERPGCETYNMILRSAMTPLELISKYKFPENSSSIETGTKRSSDSNIKDRHMFKMTQDAGVFQDEHNKFASSSLDCLSCVHLLIESDTATLRIIWRSGLQDLEEITNIFEHTYNCILSQPDASLQSMTSPTLSQLELLPAGPGQGPSLNIPDLLRLTSSTFPSKTAISAWDGDLSYHELQNTSDRWAKALLSHGLTAGDSVIHAFQHSQCAIVAWLAILKAGCTCVPIDVPTPTERLKTIIDSTTCKAAICDSTGSSHLDSTSLSLLTPSDLDESETKDVIDVAEVSISSTAVIIFTSGSTGQPK…	complement 424..4231	FKON_2837_gene_0.2	MSKLPVTQPTHSVRACHQTVVVLSSADFGSADGIWDAIVDDRPLSAWALTLRYFLSSFSVSFLCSQSLDHQQVLDNAAPGHGTIVHAKWSEVSLSVEQSALPIISVEDPSHPAADMPNSAICFCRKGMHSSPNTWLQKKGLDFVVEVHMSDQASYIKLHASSRVASEAYTRSIARTYRHTLLSLANEERGVPSGFNPGDIELAHLKSLIQHPSLDRKDALHNIIDAVAKRVPDKAAVCAWDGDLCYQQLVAFSDSLAARLVDKGLQMGDRVIFCHEKSMWASVCILAILKAGGVVVPVGIDYPRQRLAEISEAVDAHLAIVDQNHKTLVEPVVKTTLVVRGDLIRTEARSDHLVPIDQHWGNRPAVVFFTSGSTGKPKMIIHTHGAMSRNCFAGGSAMD…		FKON_3361_gene_0.22	MVGYSDGASGPAKKPGASQIPAQDLDQVWEWNQSVPEEISRCVHDIVQERALLQPSAPAICAWDGDLTYAELDHLADGLASHLIGLGVSHGAIIPLCFEKSMWTTVSILAVLKAGAAFVVLDPSIPEQRLRTILAQTKAQLVVTSMANEALSQRFTPQVVALGPHIIQELNEKEYRKPDVLPTPSSTMYLVFTSGSTGTPKGTILTHKNLASALHHQQSSLKITAKTRMYDFCSYSFDVFVCNTFATLSVGGCLCVPNELDRQNRLAASIASLKANTIDLTPSVSRILSPEQVPGLEQIIFGGEALRIEDVIPWWEKVRIVSLYGPCECTPNSTINSTPASPAEATSMGKGIGLNTWIAQADDHDLLVPLGSVGELLLEGPLLGSGYLNDAEKTAMAFI…		0	F:GO:0003824; P:GO:0008152; F:GO:0016874	F:catalytic activity; P:metabolic process; F:ligase activity			G3DSA:3.40.50.980 (GENE3D); G3DSA:3.30.300.30 (GENE3D); IPR013120 (PFAM); G3DSA:3.40.50.980 (GENE3D); G3DSA:3.40.50.720 (GENE3D); G3DSA:2.30.38.10 (GENE3D); G3DSA:1.10.1200.10 (GENE3D); IPR009081 (PFAM); PIRSF001617 (PIRSF); IPR000873 (PFAM); mobidb-lite (MOBIDB_LITE); PTHR24095 (PANTHER); PTHR24095:SF239 (PANTHER); IPR020845 (PROSITE_PATTERNS); IPR009081 (PROSITE_PROFILES); IPR016040 (SUPERFAMIL…	F:GO:0003824; P:GO:0008152	F:catalytic activity; P:metabolic process
	FKON_2591_gene_0.42	related to C-3 sterol dehydrogenase (C-4 decarboxylase)	MESPKRVLVTGGSGFLGGHVVRQLLNDVETTVAIVSRHPKMPADVADESRVSLHAADLTIPSQIEWVFETFKPHAVIHTASPSYIDTPANLIKANIDGTKALLKAASACADTRAFVFTSSHSAVIPTQEPLSEENSVLYDETNAPNAYAMSKAAAERLVIASNSGQLWTAAIRIPATYGEYDMNFVRQLVQSIRRKEHKMQVGSDTKIFEFLYVKKAAEAHILAMRALLDFERRGRAGGQAFFISDGRPQKFFDFSRKLYAAAGYPVAMEEVTRIPFFMMQAMASTAEWIYWIMTLGYIKPGMRRTAIDHLDSGCCWSLDKAKRVLGYEPVADQDEAIKKTMEWGMKAL	22937..23986							0	P:GO:0006629; P:GO:0009058; P:GO:0009058; F:GO:0016491	P:lipid metabolic process; P:biosynthetic process; P:biosynthetic process; F:oxidoreductase activity	EC:1.1.1.145	3-beta-hydroxy-Delta(5)-steroid dehydrogenase	SM00822 (SMART); G3DSA:3.40.50.720 (GENE3D); IPR002225 (PFAM); PTHR10366 (PANTHER); PTHR10366:SF503 (PANTHER); IPR016040 (SUPERFAMILY)	F:GO:0003854; P:GO:0006694; F:GO:0016616; P:GO:0055114	F:3-beta-hydroxy-delta5-steroid dehydrogenase activity; P:steroid biosynthetic process; F:oxidoreductase activity, acting on the CH-OH group of donors, NAD or NADP as acceptor; P:oxidation-reduction process
	FKON_2844_gene_0.1	uncharacterized protein LW93_11983	MKTRHQGCADFFLDLPPELRMEILKQTPLQDIRPLISASPPLLRIFQKHRASILRHHLQNLLQFYGDKSILPFVAFTMDLRALRAQSQHLTASELEEKLKPALNSIQSQKCTRQPSTGYLDFRILEKAQNLVPELCRAFYTYQQGPCSSAPRPSSYFLLEKASWQVKFTFIERLLRFDCYCNMFYYRTQSLFSLLNRGETKLQSPLLHHPTNSVERFPRTIISTLFKGYKDLINRLDYSLRSRQPNPVDTPESPKQDISTLRRNEFLDRGMPQEQSYVTHLVMGGYPLFDKLQSLTAEEFEHYTLEEFYQVVTVEPTPVAFY	7910..8997							2.45459e-124					no IPS match	no IPS match	no IPS match
	FKON_2849_gene_0.8	hypothetical protein FOPG_17405	MAAGRIPLMNSTNFSSQRGRNEAIKSHVHTAVGFIGSRIQEMPAPGTVCLVDLLTGLPHM	complement 8589..8771							3.97771e-31	C:GO:0016020; C:GO:0016021	C:membrane; C:integral component of membrane			no IPS match	no IPS match	no IPS match
	FKON_2933_gene_0.33	hypothetical protein FOC1_g10013351	MSSMEKDRIESDDQTMSSEEAPRRERRSKKKGSKRRQQAPPQQQQQQGGGSGPLDQLPLAGDLGNTVGGVTDGVTNTLGGVTGGLGGLTGGQQQGGGGDAGKDTLRLRLDLNLDIEIQLKARIHGDLELSLLYVMTPPNLLFNLPVAVVSYLACKSPERDRRRLDDKQRLIIALRCAETRRDCHYLFRLCLCLALTLFCSCHDGTHVMLLLVR	23697..24338							4.83278e-130	C:GO:0005575	C:cellular_component			mobidb-lite (MOBIDB_LITE); PTHR35587 (PANTHER); PTHR35587:SF5 (PANTHER)	no GO terms	no GO terms
	FKON_3257_gene_0.26	heterokaryon incompatibility	MRLLSAKGFFFKEFPGDKIPKYAILSHRWEGEEPSYSDMKTRLAHRDADVLGAGPLWTERNYRKIYQFGLMASQAGYEYIWVDTCCIDKSSSAELQESINSMYRWYMESGVCYAYLSDVTISADVVTHKTGSAGSKPWMESFQNSQWFTRGWTLQELLAPRELIFYDKNWHMCGNRVELQDAIQAATGIDGTSLIKASYEEGAYLRSLRSGRLFSWAASRQTTRCEDRAYSLLGMFNVNMPLLYGEKDRAFYRLQEEVIKVNEDVSLLAWNCTEADDGFAPNGLAKSPSQFRNYQNLITRDSVRVPYVAFSPIMIARGLQATLKVRRDPYEKGLGYAVLVHEMNRRSLVLPLLFCSMTFVRTPIQNECVRFSDPIYVPSRFVNEAKPEPICFIRHTEAA…	6610..8340							0	F:GO:0000166; F:GO:0005524	F:nucleotide binding; F:ATP binding			IPR010730 (PFAM); PTHR10622 (PANTHER); PTHR10622:SF14 (PANTHER)	no GO terms	no GO terms
	FKON_3347_gene_0.100	uncharacterized protein FMAN_13916	MKSIAEVTGYQAPPSTEIDWSSHENSALPDLASRLRFTTHYALCVMDRELWESTSVSLLQKFRGARFWDHPGDFTMMSPSRSSRSNSSMRPAIFNACIPWSDGDIENIDSGEVIGQTDMSNEEITRDYTALREDWTYMPIFWNCHDLAIRLAYIIVRPSRHVIQVLKRLMILLRQACHKEIKWDHTAGSVCVGGWGVAALGGMASVPPLAMVGFGVFMVGWSVGFFGGIAVGVKEKARYKFMIKLEEKFPQLKSLHS	complement 114901..115843							1.58257e-128	C:GO:0005575	C:cellular_component			mobidb-lite (MOBIDB_LITE)	no GO terms	no GO terms
	FKON_3358_gene_0.26	related to tol	MPVETIQPKRETTVAYPSFDPDAEGKCWICIKHAGFLEDHYPAVFERWLKHELLVTVQADLASLEQEAQPRTLHSPSDETLPPDSRGRQNLEVRQLILYRNHGGDEKPIGPYMTLSHRWSNYKYEKLTSQSLSRFRRSIDTSCLPRVFQQAIEVTRLLKIRYLWIDSLCIMQDTACGDWEAEALKMGDVYANSFLNLSASYTAGDDENPSIFSPESWNHFLPSKLVLMDDKELRSNFFVDGDLWKDEVGESPLMERGWVFQERFLAPRVLHFGMRQLAWECNGGGALQMFPAGLPPRFEDNYKKDVCWPMMRPMNTLSSEEFCSRWHEIVTAYSACHLTFNTDKLIAFAGIAKLIQSAGRDEYVAGTWKSTIIADLAWWVYKANGRLPSGNPATHRAPS…	27589..29707							0	C:GO:0016020; C:GO:0016021	C:membrane; C:integral component of membrane			IPR010730 (PFAM); mobidb-lite (MOBIDB_LITE); PTHR33112:SF9 (PANTHER); PTHR33112 (PANTHER)	no GO terms	no GO terms
	FKON_3476_gene_0.103	uncharacterized protein FMAN_12390	WLSDILFASAMPCDSTHTDTVPKGDTPPNTTETKMLEPYIHDTSSLQDRLLMRSMAEDNKATGNGAGYSGPKDSKL	complement 52148..52434							1.63306e-38					mobidb-lite (MOBIDB_LITE); mobidb-lite (MOBIDB_LITE)	no GO terms	no GO terms
	FKON_3662_gene_0.15	hypothetical protein FOVG_00840	LGVKVAFGARLGGLLLPIVPRRAWYCCRIAPVKPPCQPAVPTEWAESRHRPRATPAAYSLPIEAYFGFSARSPGPHLRTPAAFRNLHSLILPPTLAHSNSLLYTSANTNVPMTADNRKQIRPPYELPLLGWADKCVFQTVTTIHHSCRDASRGLTPFRRSTTPHHTTSLPTNNIILPTHTLYNSPKETLPIQFPNKQTKVHALVINVYQVRGVISCVRTSCRTITSLSEAAF	complement 22112..22959							5.02945e-25					no IPS match	no IPS match	no IPS match
	FKON_3833_gene_0.14	hypothetical protein FVEG_06590	MAVHSHEGVHMDDFPKQFSDHINATIKPYIADKGYDWEVTVTDIQRDFWRFNGIAPPPWRSETERVWARDGRPSEWEEKKKRVDWRGI	complement 12092..12358							6.45199e-47					G3DSA:3.30.429.10 (GENE3D); IPR028116 (PFAM)	no GO terms	no GO terms
	FKON_4051_gene_0.10	---NA---	MDGFDGRWVSKVPISGRDRRLQSLINYSIVVLDDDDGAYNQTMAAESLKRALVDESGRKH	complement 6328..6510												no IPS match	no IPS match	no IPS match
	FKON_453_gene_0.2	related to myo-inositol transport ITR1	IASREHFAASVGSACIALNDNAWLVLGSIRLIGGVGMGLKATNTPILVAETAVGSLFVTVSFGIMMAFIVNICLNQIDDKELKLRLILTSPAVFALMLMYTIAKCPESFRYYLMPGSRKYSPEKACASLLRLRNTKIQAVRDLYLTYKGIDSEFENEGYDRTKAATKPRTPAVGAVSHYVLQYWRILKVRRLRNAAITTGIVALSQQLSGINLMAFYSGTTLVGVGPGDHPSDNQISKAMMYNLIFGLLNFLFCLPAIHSIDVLGRRKVLLLTIPGMALTLMAAAICFDAVNEKVKNEVVTFWIYFHAVFYSPGMRPVPFVLAAENFPLAFRDTQGVSLAISINLLFAGLLAWLQPLLVAGIRFGGTLGVFSGLNVVAFVLIFLLVEETSGIPLQSLGL…	15136..16897							0	C:GO:0005575; F:GO:0022857	C:cellular_component; F:transmembrane transporter activity			IPR003663 (PRINTS); G3DSA:1.20.1250.20 (GENE3D); IPR005828 (PFAM); PTHR23500 (PANTHER); PTHR23500:SF292 (PANTHER); IPR020846 (CDD); IPR020846 (SUPERFAMILY)	C:GO:0016020; C:GO:0016021; F:GO:0022857; F:GO:0022857; P:GO:0055085	C:membrane; C:integral component of membrane; F:transmembrane transporter activity; F:transmembrane transporter activity; P:transmembrane transport
	FKON_4639_gene_0.1	transcription factor rfeH-Penicillium chrysogenum	LSPFTKITTQFPQCAIHSHQRLFNVHTLVVSTVVHPAHEPNPRPTLPQKDQNMSVHAYCGDHSSECVGHPLGNATVFQTSAIASALTNETESLDGKCHTDATCYLNGAQGSSHSMLHTDKAIIKSEGLGVSHKKPRRQSPAPKHQHHQQQDLRLGQVNFAQPINMLCRSCRAEKTPRWREGPAGPRTLCNFCGLVYAKRQQKYHGAPSSHCFSSD	complement 5083..6495							4.28462e-75	F:GO:0003700; P:GO:0006355; F:GO:0008270; F:GO:0043565	F:DNA-binding transcription factor activity; P:regulation of transcription, DNA-templated; F:zinc ion binding; F:sequence-specific DNA binding			IPR000679 (SMART); IPR000679 (PFAM); IPR013088 (G3DSA:3.30.50.GENE3D); mobidb-lite (MOBIDB_LITE); PTHR10071 (PANTHER); PTHR10071:SF240 (PANTHER); IPR000679 (PROSITE_PROFILES); cd00202 (CDD); SSF57716 (SUPERFAMILY)	F:GO:0003700; P:GO:0006355; F:GO:0008270; F:GO:0043565	F:DNA-binding transcription factor activity; P:regulation of transcription, DNA-templated; F:zinc ion binding; F:sequence-specific DNA binding
	FKON_4643_gene_0.3	Vacuolar membrane amino acid uptake transporter fnx2	IKSNLLESFLGLDHLPFVPIPCNERPRTARISEKMVHNDDPQPQLVDERTSLLSSQSLVSDQGTIKTPQQESREVSSHGDISVARSVLPTIPFGIFIAQADSSIVLATSQDIASEFRVLSDASWLITSYVLAQCVCQPLFAYHLDYPILFSTLTSPLQYGRTSDIFGRKPAMIFSYAAFKLGCIICGIGTSYWHVLLGCVVGGIGGAGMVGLVAVIIADFLPPRQVATWRSYVNVVATFGRSCGGPLGGWLVDTVGWRWCFIGQSPVATMAVLLIIWKLLVNIAGRRADQACPSIADRLRRVDFAEFVLLPAALVTAFISLDLAGKLYPLHYTVPLGACAVFLLASFYYVEKYYAQEPIIPMDVYIPYLLVALQTASQFIVRMSVTAAGSRIVFIVVGN…	17745..19640							0	C:GO:0016020; C:GO:0016021; P:GO:0055085	C:membrane; C:integral component of membrane; P:transmembrane transport			G3DSA:1.20.1250.20 (GENE3D); G3DSA:1.20.1250.20 (GENE3D); IPR011701 (PFAM); PTHR23501 (PANTHER); PTHR23501:SF106 (PANTHER); IPR020846 (PROSITE_PROFILES); IPR020846 (CDD); IPR020846 (SUPERFAMILY)	C:GO:0016021; P:GO:0055085	C:integral component of membrane; P:transmembrane transport
	FKON_4695_gene_0.28	dead deah box helicase	MASTDKKPSEEALLNWYKGLQPLTVDIVGDFAGRELFLIHGEALMQYCLIEARVDFDSKSFHFAGVSVEKFLVNLKNGDCNFDIAFFRDFENVCASEGSAGSKHPYKYKLTRRILIQHLTRGIADFKILEFDSFDSQECRTYLANNAIHFMLCDDGRGVSLDQSVRLRHLIWKVISSGRNVALINSISWKSSKIFMPLLSGSKGMLPDLHIDTPACETKPSADFSQKVLDETLRFSIESSDLSAREKFAAVFCRVFLERSSKEGEISGVDLELVEALLLHMAALRACHLQNRNIHPERFSKHFVDSYDTGFVQVFCTASQHLAENGYAVRGQAEWDLFDLFNGHVFFYILQSIRDGSEFPMPIVDRAKVLSATAFGQRSMNGRSLFMALKASESNLPPV…	complement 39985..45616							0	F:GO:0004386; F:GO:0043167	F:helicase activity; F:ion binding	EC:3.6.1.15	Nucleoside-triphosphate phosphatase	IPR014001 (SMART); IPR001650 (SMART); G3DSA:3.40.50.300 (GENE3D); IPR011545 (PFAM); IPR001650 (PFAM); G3DSA:3.40.50.300 (GENE3D); mobidb-lite (MOBIDB_LITE); mobidb-lite (MOBIDB_LITE); PTHR12131:SF10 (PANTHER); PTHR12131 (PANTHER); IPR001650 (PROSITE_PROFILES); IPR014001 (PROSITE_PROFILES); cd00046 (CDD); cd00079 (CDD); IPR027417 (SUPERFAMILY)	F:GO:0003676; F:GO:0005524	F:nucleic acid binding; F:ATP binding
	FKON_4763_gene_0.19	uncharacterized protein LW93_10063	MWFPTTADTPKLIDALRKLGVNDSTSDSASTCTIRTFETTYYSARTSPDSDSLSDVISIASTCTTVTLDFIFILEAEVGTALDPSDGLVPGAQAITEDPAFEGKSHFVNGRKLVLTAGCDRIR	complement 26277..26696							1.24959e-48					no IPS match	no IPS match	no IPS match
	FKON_5146_gene_0.14	uncharacterized protein FMAN_06759	EVLKSQCQPDDIPSSPATTLSNDNTSDGGSTTSLSKHDRYSDIEEGPVDGSANQGISMNQTDPTSNEGADLTKFTLKSLLLGEELKRLQVWKTSFSNEELDMLPTIDHEVAQSVLQCLTSVASILIEGSMELRMRSEPDDLGAEGAILESLLEEIETKISENNVENEAMTDCSGISESDESYLTVGDPSLIKALKYEIDRLQLLSHSLRLGMRTRVIFQNS	complement 17386..18107							5.73683e-133					mobidb-lite (MOBIDB_LITE)	no GO terms	no GO terms
	FKON_5453_gene_0.17	uncharacterized protein FPRN_11111	MTHLFHLRSTRWGHRNTQLTNTPQKSSYNPFNNAHYAKMASIKTWFIPKDQGREYRRDIAFAHVQIDLRNRLDQNIWETVLDTACRQNEDMIKSIERDLKEETEQQIVVCFSPWDWIQDLPWKNNQGFSIRPAKDDSLEDRLKYFNRMPPKNVLRYEPSYRHPFPLAEFEQIHLCLTAFRKQTIFDPYTEQMARIRLLTSEEERREQVALAFRTSNVPLRVAMYCDQGTIDHFVEFGASERRLKIHNGHAPGFLLALVCLKDWEIDIEKLISCFFSSDQEYFILRPVRYNLYMQGVTRYIPKGRSDEDVSRAEKGFLNLLGTTIHERTSLLQKLLPVVDFDHRLAVFVARPTHSAKVLKVKLQLAAILVTGIERLFSFAPRGNMPYEEYKSSLVNTCQG…	complement 29044..31327							0					Coil (COILS)	no GO terms	no GO terms
	FKON_5453_gene_0.55	uncharacterized protein FFUJ_13928	TSPSCHKFEEDTNNGCKPLSEWNVKLLAELNSHQRCYWKGDHAYKFDKLLSWPWVLADRAQFVSRLRQQMSSAIARIIEATEDQQVAASPTPPATKTSPGGKKETHDLAIENLRVQIDISSSLRGLFEVQHRRQAHREAAAGDASALAHIDANDYPSIPPRVGPSTLPRSIGLVDLIDSDDEEEPSNNSETAKAAGKKRAAPGGSGQSATGGKRPRAK	21275..21987							1.09915e-58					Coil (COILS); mobidb-lite (MOBIDB_LITE); mobidb-lite (MOBIDB_LITE)	no GO terms	no GO terms
	FKON_5456_gene_0.0	hypothetical protein FOXG_19039	MDLMQALLSTFTVQCSTAQEPGSFNPRLPALRQGPLTIDWPPFDLRKSTLYMGPATVRMYV	2326..2511							1.43705e-16					no IPS match	no IPS match	no IPS match
	FKON_5467_gene_0.13	uncharacterized protein FMAN_15264	SLAIGVIPLVIQLLQTAKSIRDLATVYKSAETQLKSLLNKLDYIETICNSLIELLPGLEDDCRSRGPSGENFLSSLYRIISACCEKVSHIHRTLVIIYAKQKPSRNPLKTIGSRFLLHRDQVQACTDELDALLSLLQLQITSVTLALRITTPKRIVGPSFATTGSPRTSGRTFSEAALEPSGLLRSRRHRSQVTIETWRQCWEGVAFVQRTREQTKSPILTSSEFSTIQNDSTFTLGISLLNWHVKFSMRYGALSPSSFSFQLPRVFSICNRRSLLVRGIAQAFLEDNLEKVQEFFREGILTPATILSTYDYDPNKETSLLGVRYLFNCQTIGLLIHKQLAVLTRASRLLEFLTFQTSDIFTRSHLCSPSFSFLLDHAEDVTQIIKYIDLRKDFITPGE…	28121..30276							0					Coil (COILS)	no GO terms	no GO terms
	FKON_575_gene_0.29	amidase	MAEVNWQQLINQKRATREALIPEQWLLPATITSKVTPQSTASAFELLSEAGLLTEREIDITEKYTAVSLTAKIATGELSSYDVATAFCKRAAIVHQLTNSLTEIFFDKALERARWLDEYLSKEGKTVGPLHGLPITLKDMIHVKGQYSTMGFVGHLRHPPADENAVIVDMLEAAGAVFYCKTNVPQTLFVCESFNNVFGRTLNPYKLCLSPGGSSSGEAAQLGLCGSIMGVGSDIAGSVRVPAMFTGVYGFRPTVNRLPWSKQAELALKGWQGVQPTLGPMARTAQDLTLFMKTIIQAGPWRYDSTALAIPWHDAPRKDKLTIGVWSQDPHFPVFPPIARTMASAVGRLRAAGHTIKIIEAPPTMKAMKIAMRWFALDQVNLPLKFVQDGAESPIADLD…	2025..3891							0	F:GO:0004040; C:GO:0005575; P:GO:0008150; F:GO:0016787; F:GO:0016884	F:amidase activity; C:cellular_component; P:biological_process; F:hydrolase activity; F:carbon-nitrogen ligase activity, with glutamine as amido-N-donor			IPR023631 (PFAM); IPR023631 (G3DSA:3.90.1300.GENE3D); PIRSF001221 (PIRSF); IPR000120 (PANTHER); PTHR11895:SF109 (PANTHER); IPR020556 (PROSITE_PATTERNS); IPR023631 (SUPERFAMILY)	F:GO:0004040	F:amidase activity
	FKON_582_gene_0.17	class v	MSDAERLLKRYDNQTQGMIQGEKGTHARDLITRQGSPGGFHDPNIYQWLGCGGYDDDILQGADSDRYADDSNPCWTVLITSRLPMTWLKALILFLHRASVLVPLHHGRPITQQPTPRLIAHTTQILAGPEATVSAPARSNVTPANRCAYTSPLPKTTISVSQLPTGPTASTPSPSPPTWVLVIYTREIEVAGHGGVTDTWWWDCRPFHRGGQSDSDVCAIKDNPIAYSTTVRRASPAQYPTSLAGYLWSSLPCVLLLLETEYGDGWQRGM	complement 24132..25032							1.81696e-88					no IPS match	no IPS match	no IPS match
	FKON_6486_gene_0.76	Phosphoenolpyruvate pyruvate domain-containing	MESNKLARTLKSLHIPSQPLIFVNVWDIASLNMVLGLNREASKPVKAIATASWAIAASIGIKDEDLTMYSRT	complement 34185..34403							2.29451e-26	F:GO:0016829	F:lyase activity			G3DSA:3.20.20.60 (GENE3D); PF13714 (PFAM); IPR015813 (SUPERFAMILY)	F:GO:0003824	F:catalytic activity
	FKON_6487_gene_0.112	related to sugar transporter	MESTSAMRLPIVIFVALGSLSYGYASSIIATTLGQPTFLSYFALDSRHNANDLMGAINGLFQAGGFLGTLSCYAIADSLGRRKAILAAALISTVGGALQAGSANIAMFIASRFITGALVTLVPLYQSEMSPSHIRGLLVGIHGGMIGTGYALASYVGLGFYFVKASGAQWRIPLAIQCLPPLLLAVGILFLRETPRWLILVNRIDEARDSFNYTRLGSRGGPTSNEETTDADFETLRRQTICETEQNITFLDLLKTPSMRKRCITGFLTTFGCQATATIVINNYGPLLYASLGFNTVQQLLIQCGWITVAPFGNFINAFLVDHVGRVKMLLGGFAGCIVALIGECITMSVFSKTNHRGAASGAVFFLFLHVTIFTLCCDATSYVYASEIFPTPVRAKGL…	complement 47150..48992							0	C:GO:0005575; F:GO:0022857	C:cellular_component; F:transmembrane transporter activity			G3DSA:1.20.1250.20 (GENE3D); IPR005828 (PFAM); PTHR23500:SF322 (PANTHER); PTHR23500 (PANTHER); IPR020846 (PROSITE_PROFILES); IPR020846 (CDD); IPR020846 (SUPERFAMILY)	C:GO:0016021; F:GO:0022857; P:GO:0055085	C:integral component of membrane; F:transmembrane transporter activity; P:transmembrane transport
	FKON_6778_gene_0.1	uncharacterized protein FFUJ_06118	MSLATTVEQPLLRVAPSVPWPSVGACRNLPAVIVAIDYGYVDTLDSVPSNIRGRIPRQIKDGERLMIWKGEMGYLFGRNPINSDVLVLIFKGALQIPVVLPSSIVVEGRPFRDLTQQTTDLLGPTREPQVSIRSHSNDRALQKFIRSFVLSTSRQQGDLRLLGLSPSEADELFMGSNLDNNVDALLEAILPEVKQTLEDGRFSLQNILDLRHASIDWPGDRPCIYVRIYTDPEDQPEDESRDEAQDDIDEYVGIYVGQSRQVWVRHLDHERNIEFHVPAHGKTHYNTAVKSLPEDRHTIPLLVFEDRSISSILLNMAEQVMLNALRAEARWIFAATPGNAMIYLLQRRARLFSDTARAVRSQVNWPRLNGQGLNVSSPLLEERYQIHLHCIPMATSGGP…	13522..15872							0					no IPS match	no IPS match	no IPS match
	FKON_6841_gene_1.67	hypothetical protein FOC4_g10014528	KCDGLHWLPLTLRPPADGRAPHSFAEHCRGGGGQEMVSMVSSRNVTKTRRIGLAPKWIRNGSRAEAELSSKPHRNATPDHITFMSGNDLTEPRGRAGMFKQYYPERSSYNVSKCYSQYYFNEPSAFDHWTDQLSLDRLPTAPSDLATGSVMACNPFASTALWTPRQSGWIWRFLQITTAGRNKVQTCRHHMLQALSPHPSHQWPMVGLQGPLWALEEGICAKEDKLKNTKFKVNRIVKHVTALLTRQSNSLCCYWTT	complement 142712..143554							3.64799e-51					no IPS match	no IPS match	no IPS match
	FKON_6844_gene_0.9	HET-domain-containing	SPEDSCFNPFQLLRNLRATFPVPPGFVHFCPFCSLTHTIEKDQVLCIGLLQKKVCRLWRQRVTCGANNCLDDPAAETVGPRPFRQTFSSEESRQWVMSRLKTCETSHYKCRPQGSNFTPSRLLSLSQCQDGSLSVRLQDVLKGYHRAEASLYTALTYCWGGHQELQLNANTKAALLKGLPISKLPRTLQDAVSATHNLGLKFIWIDCLCIYQDNPQDIALEIAQMPKIYMNSFITISAARAKHSNEGFLHDISVPSISKTAFRLPFACPNKKLGSVILSNGLANSPIDDRAWTLQEYILSRRVLQYTNAGLHWTCREAVEFRQDDACLALDYLGPFKNSYRMFQGFYESNKGCRNWMNIVEVYTKRELTYALDKLPAISGVAETWAQALDDSYLAGIWL…	385..2533							2.55679e-155					IPR010730 (PFAM); PTHR33112:SF9 (PANTHER); PTHR33112 (PANTHER)	no GO terms	no GO terms
	FKON_687_gene_0.92	hypothetical protein FOIG_16087	MDKKGELVHVTGDTLGRFVLHSTLLRLIDPVRGKPTRSTLDENPDGSFLGAWQLQQKFLDSFALICSTSSSGAETATAVCLEIHDEKIGNILRLARNHGLTPEDLAELQRVLKVLQEVSRRETPSPQAETKVLQLVAELDKGRILSIAERIEKRGIRQFLQKAQFGVYGSQLQSEKLRIWLESCPFTTSASRIQNWTCATIVKLINWALEARWQYAEQLRTLLNLDESQSPAWLDHLHKMARYRSGIKSMVKFAMKEPGIFVNIAIRPINAPHQRRFKLPKDEAPLLAIVRILMGKDTNSTMEKLEKHCGTHDVEARLRGACPRMLTLHAEMQIVVFYESNPVVAPHLRLIGTSKKACFLCDKYLRHHPLRLQASACHQRIYPSWMPPPYYNVPGNSAK…	42742..44207							0					IPR027796 (PFAM); mobidb-lite (MOBIDB_LITE); PTHR42037 (PANTHER)	no GO terms	no GO terms
	FKON_6879_gene_0.2	related to VBA1-Vacuolar Basic Amino acid transporter	LTHTIMSDLESSSVVSWLGASYLIATALVQPLSFALGNLTCSIAESLAFLVVGRALSGIGGGILTIMATIVLTDVTRTEARGLWQGINNIVYGFGHGSGGLFGGLVAHRWSWRVAFMSLSVPALLIMLGATLLPEPARRHNQITDNASAAEESTATGNEDVPLLPKLNSSGRKVDAMGAILLSLGLGSLLASSQQLEFGSSNLDLRLVAFGFVISFIMLTAFSYHSVFMTKDALLPLGLLTKSPSVGYSCLVAFLSQFGFTISEFYLPYYLSLQEHTKMEVVGWCLVPLSVGAAAGSFLAGFLTSRSNTSHLLLGSSAVAFIGTLGVLLTPHKTYALTYQLVSIFLWGLGFGGLATASLVRMLDSTEVNKQASATSLLYTSRSLGGALSLPVASFVFHM…	3919..5439							0	C:GO:0016020; C:GO:0016021; P:GO:0055085	C:membrane; C:integral component of membrane; P:transmembrane transport			G3DSA:1.20.1250.20 (GENE3D); G3DSA:1.20.1250.20 (GENE3D); IPR011701 (PFAM); PTHR23501 (PANTHER); IPR020846 (PROSITE_PROFILES); IPR020846 (CDD); IPR020846 (SUPERFAMILY)	C:GO:0016021; P:GO:0055085	C:integral component of membrane; P:transmembrane transport
	FKON_6879_gene_0.4	Tryptophanase	MSQVISIPTFTVAAVRQTEQVPRDVRERILRSVQYNVFAFPAALVVADFLSDSGTGAMTTNQWSAIMQGDESYGRNCGYYYFLEAVRDIFERGEHRLNAFQEMRPDLKTNTAFERYLEYQDKGFVNGGLAQMTRPNFFLVPQGRCAESLLFQATAHAFSQPDSQQPIIISNGFFDTTSGNASAAGFRLITFAQEGWMHSQPIQDWQNKNTFKGNMDISAAERFLSNRDQKGRVALIILTITNNFAAGQPVSMENIREVSRLSKEFNIPLIFDACRFAENAMFIKRYEVGYKDSSVPEIIREIFSEADGFTISLKKDGLANMGGILCLRDGGKYTTKYQGIGTAIREQQILRYGNDSYGGMSGRDLMAATVGLYEGTKESYLSSRLDQVNRFAEKLAEAR…	complement 1161..2759							0	F:GO:0003824; P:GO:0006520; P:GO:0009820; F:GO:0016740; F:GO:0016829; F:GO:0050364; F:GO:0051213; P:GO:0055114	F:catalytic activity; P:cellular amino acid metabolic process; P:alkaloid metabolic process; F:transferase activity; F:lyase activity; F:tryptophan dimethylallyltransferase activity; F:dioxygenase activity; P:oxidation-reduction process			IPR015421 (G3DSA:3.40.640.GENE3D); IPR015422 (G3DSA:3.90.1150.GENE3D); IPR001597 (PFAM); PTHR32325 (PANTHER); PTHR32325:SF5 (PANTHER); IPR015424 (SUPERFAMILY)	F:GO:0003824; P:GO:0006520; F:GO:0016829	F:catalytic activity; P:cellular amino acid metabolic process; F:lyase activity
	FKON_6897_gene_0.20	TPR repeat	MTASTAAQYIDLNAIEQIEMLLQDIQRKPQSCDLAEGALLSTVNLSEEKLGKDHSITIHVAFELAKFYRVKKEFAMAESAVSRVLECRERVYSESHVITLKPLCELAQTLDDQIDLQGCKTVLLQACTKYWDLNPCGTEALFCESHLAHTLETLGMYEDAGLLFLDLVEKHRQANTIQDSLGLHYVSSLILNP	13416..13997							4.29918e-09	F:GO:0000166; F:GO:0003777; F:GO:0003824; F:GO:0005524; C:GO:0005871; P:GO:0006629; P:GO:0008152; P:GO:0009116; C:GO:0016020; C:GO:0016021; F:GO:0016788; F:GO:0043531	F:nucleotide binding; F:microtubule motor activity; F:catalytic activity; F:ATP binding; C:kinesin complex; P:lipid metabolic process; P:metabolic process; P:nucleoside metabolic process; C:membrane; C:integral component of membrane; F:hydrolase activity, acting on ester bonds; F:ADP binding			IPR011991 (G3DSA:1.10.10.GENE3D)	no GO terms	no GO terms
	FKON_6921_gene_0.16	mannitol 1-phosphate dehydrogenase	MSTPKPLKVAVVGGGISGICLAIGLLEQPQLELTIFEASPAFTEIGAGLALGPNAQRALQLLSPEAEAAFWHFATGNSSPEFTKTWFNFRRQAQGHEDGLELGSIENQSGQQTVHRAKFLDALINLVPRDRVQFGKRLLSISDHGAYTVLHFADGTAARTDCVIGADGVHSTVRKYLLGATSPEATPVFSGIVAYRGLIPMEIARHSLGKYASDAYLWCSNEGMVMSYPINSGQVVNVVAACYRESWNKKVYVLNTTLEQMRKDFQSFEGIPQEIIKVHPIALPSFFDDPRLTFDKLLGKPMVWAMLEHLPAAQYNAKSVAIIGDAAHATTPFQGAGAGQAIEDALILSQLLGRVQCVHEIAPALAAYNTVRRPRTERVIQTSREAMKLYTLADSAETW…	complement 19942..21261							0	F:GO:0004497; C:GO:0016020; C:GO:0016021; F:GO:0016491; P:GO:0035690; P:GO:0044550; P:GO:0055114; F:GO:0071949	F:monooxygenase activity; C:membrane; C:integral component of membrane; F:oxidoreductase activity; P:cellular response to drug; P:secondary metabolite biosynthetic process; P:oxidation-reduction process; F:FAD binding			PR00420 (PRINTS); IPR002938 (PFAM); IPR023753 (G3DSA:3.50.50.GENE3D); PTHR13789:SF271 (PANTHER); PTHR13789 (PANTHER); IPR023753 (SUPERFAMILY); SSF54373 (SUPERFAMILY)	F:GO:0016491; P:GO:0055114; F:GO:0071949	F:oxidoreductase activity; P:oxidation-reduction process; F:FAD binding
	FKON_6921_gene_0.21	pisatin demethylase	MRWEFLDKQQAALVLALGIASILIHHLFSKYYRLCRIPGPLIAKLTDLHRFFCVRSGFIHLYHAKAHERYGPVVRFGPNMVSVCDPDAIQMIFHKRNGFDKACGSDFIQNHFRCHYLTKTEQHVSPWTPDGLLLSVFTANNDEKNRQMKQHIAMYFSLSYVVSTFEKRIDRTINMFLNQLDQQFMATGASCDLTQWFKFFSYDAMGQMTFSRAYGCIEHGNDSIGIISDVKNTMLAIGPMTQVPWLDWLLHKNWLLNSIKPEPVSCLLMYVLKRIAERKNNPTKLHNTVDAGPDLNSDFLGYFIQAQEKESNKVPPRFLSTWTLANILGGSDSTASMLRSVVCFLVENPDALQNVRDELLDKQRDVKGFSLPVPKWNELQNLPFLDACITESLRLDPPF…	complement 14624..16317							0	F:GO:0004497; F:GO:0005506; C:GO:0016020; C:GO:0016021; F:GO:0016491; F:GO:0016705; F:GO:0020037; F:GO:0046872; P:GO:0055114	F:monooxygenase activity; F:iron ion binding; C:membrane; C:integral component of membrane; F:oxidoreductase activity; F:oxidoreductase activity, acting on paired donors, with incorporation or reduction of molecular oxygen; F:heme binding; F:metal ion binding; P:oxidation-reduction process			IPR002403 (PRINTS); IPR001128 (PRINTS); IPR001128 (PFAM); G3DSA:1.10.630.10 (GENE3D); PTHR24305:SF138 (PANTHER); PTHR24305 (PANTHER); IPR017972 (PROSITE_PATTERNS); IPR001128 (SUPERFAMILY)	F:GO:0004497; F:GO:0005506; F:GO:0016705; F:GO:0020037; P:GO:0055114	F:monooxygenase activity; F:iron ion binding; F:oxidoreductase activity, acting on paired donors, with incorporation or reduction of molecular oxygen; F:heme binding; P:oxidation-reduction process
	FKON_6966_gene_0.119	---NA---	MANMLAIVPASHPLQSSGRSVQLHQLDRILLYTIVSVSLPSAVVYLHTSLWACGLLDKLLAKFDQAAPHGHQARHRCGHLGLDI	complement 116277..116531												no IPS match	no IPS match	no IPS match
	FKON_6996_gene_0.5	related to oxidoreductase	MATQTGIIIEGANQPHKVVDNIPRPSPEGRQVLVRCLAVGLNPIEALQHHTGMMVNEWPAILGSDGAGVVVEVGPDVGRLKAGDYVYSCAPVGQNRFTPFQDAYLAREDLLFKRGNNISLEDSCTIGACLLTSSICLLGGAGLELPDDGNRAQEKDEWIVVLGGSGNVGQFAIQLGKVCGYKVLASCSPSKQSIAVRNGASATFDSRETIDAQVAEIKKMTGGNFGKMMDASTYGYKVMVEALETASDAKDKYLTSVDSWSPFSTPSSINEHRADLGHLCRPNERDGTQITSNIANWIPLLEKHVAAGTLKPLEHHVVDGVGWEKVIQGIRDMEGGKIGKKIVVRTQEE	25416..26721							0	F:GO:0016491; F:GO:0043167	F:oxidoreductase activity; F:ion binding			IPR020843 (SMART); G3DSA:3.90.180.10 (GENE3D); IPR013154 (PFAM); G3DSA:3.40.50.10730 (GENE3D); PTHR43006 (PANTHER); PTHR43006:SF2 (PANTHER); cd08249 (CDD); IPR016040 (SUPERFAMILY); IPR011032 (SUPERFAMILY)	F:GO:0016491; P:GO:0055114	F:oxidoreductase activity; P:oxidation-reduction process
	FKON_7040_gene_0.35	---NA---	MPYRESHGKQAKGHSINQADIEGAPCQLCSSVPTCGIVTAGGAMGRQESTETKFSYLDTLKQMFLAVCRYRILVETRTTTN	complement 9942..10187												no IPS match	no IPS match	no IPS match
	FKON_794_gene_0.5	hypothetical protein FOVG_18963	MAALHENIDPNGDTLIIISYLAVPTQSSDEPVAAEEPAAAVEEPAAIYERDHTDGHSTISSIDGTTHCHEGDESVSELRLKVSKKHLTVASRRARAMFQSDYRETRKTEVDGLYHWKIGPLFDPEALRIVMKVIHAQAQDLPDKVTLQMIVSIAEIVDDLQCHDALSFFVKVWINRLSESVPSQMCDELVQWIFVALVFGLDEKFKQATRVAIMCSTGPIDVLGLPMRPDIVDKIEQRRQDLLEDLIAQLNAVLGNLSSDHSCHVLACRLMMLGALTHQMKNTNLHSPRPARPFRNQSLSSVLGAVRHFDSPSLYLPSEDKSHYSFDYFESSFQGSEEDVWVLQKDAPSSSRRKKKDRGLFDEEDDVEQLNKTPRRLKLHCCRLQDYLKPVIDLLEAKV…	complement 112..1448							0					G3DSA:3.30.710.10 (GENE3D); mobidb-lite (MOBIDB_LITE)	no GO terms	no GO terms
	FKON_988_gene_0.9	salicylate synthase	MLLKVLSWLWTFWPRIGTVDITSKNKIIAGALALAASLPASMLNEGHKQKVLALSSLDQVARDFVKLTIKRYIGYRYATHTRGIPYTPGEWPSLSLMVPRHQIMLASDKIVVQGQETEAFRHLVDVVVSAHMCNMQRPQSMRMDISQRFSQYTTAVERTLSKVRGGQVMKTIVSRAISLPERVDMLATSLGVKHTKKLFSFNHAGYKPTGFSPELIASLEHGIIIAEPLAGTRVCPEDLVERIRFRNELENDPKKIAEHIMSVEDAIAELQYICAHESVEAEDLMSVRIRGKVQHPGLRVTGALGDSRYCWDTLNVLCPSITDPAFQRQMLWRSLSL	complement 14315..14736							1.96073e-144	F:GO:0004049; C:GO:0005575; C:GO:0005634; C:GO:0005829; C:GO:0005950; F:GO:0008909; P:GO:0009058; F:GO:0016829; F:GO:0016833	F:anthranilate synthase activity; C:cellular_component; C:nucleus; C:cytosol; C:anthranilate synthase complex; F:isochorismate synthase activity; P:biosynthetic process; F:lyase activity; F:oxo-acid-lyase activity			IPR005801 (G3DSA:3.60.120.GENE3D); IPR015890 (PFAM); PTHR11236:SF26 (PANTHER); PTHR11236 (PANTHER); IPR005801 (SUPERFAMILY)	P:GO:0009058	P:biosynthetic process
	FKON_997_gene_0.114	Penicillin-binding	MSNRSVAAVYGGYGAIMEECAAAFSLKASASTIAKLTNGIAVSGIGRRKNGYRRGNFEGARTHVESNGDFDFAVVFNTRDFAFDQEFEYLTENQIHRLLDDLVPPFPRSKDKNWGY	complement 81134..81537							3.34632e-59					no IPS match	no IPS match	no IPS match
	1Values indicated after 'FKON_' are indicative of the contig number
B	SeqName1	Description	AA sequence	Location	Multiple copy gene	AA sequence (multiple copy gene)	Location (multiple copy gene)	E-value	GO IDs	GO Names	Enzyme Codes	Enzyme Names	InterPro IDs	InterPro GO IDs	InterPro GO Names
	FSUB_100_gene_0.10	uncharacterized protein FPRO_11555	MITFCLVPEAPATTTTHLFLLRSTRWGHRNTQLTNTPQKPSYNPFNNAHYGKMASLKTWFIPKDQGREYRRDIAFAHVEIDLRNRLDQNIWETVLDSACRQSETSAWAVGPDTHTDIVIFYIDPLISAECALAMLGTVHWATVICDAVPVRFISISHAPYPESLRRLLYHYGHPGITRFTSKSPEETLQQARAMDMTDEDMIKSIERDLKEETEQQIVVCFSPWDWIQDLPWKNNQGFSIRSAKDDSLEDRLKYFDRMPPKNVLRYEPKQVERENYEPSVEREDCTMLHFPPGYRHPFPLAEFEQIHLCLTTFREQTIFDPYTEQMARIRLLTSEEERREQVALAFCTSNVPLRVAMYCDQGTIDHFVEFGASERRLRIHNGHAPGFLLALVCLKDWEI…	complement 26922..29431				0					no IPS match	no IPS match	no IPS match
	FSUB_100_gene_0.50	uncharacterized protein FPRN_11108	MTSPQETQHQGCADFFSELPPELRMEILNQTPIQDIRLLISASPALLRIFQRHRASLLRHHLQYLLRFYGDKSILPFVVFTMDLRALRAQSQHLTASELEEKLKPALNSIQSRKCTRQPSAGYLDFQILEKAQNLVPELCRAFDTHQEGPYNSTPRPSSHFLLEEASWQVKFTFIEKFLRFDCYCNMFYYRTQSLFSISNRVETKLESPLLHHATNSVERFPRTIISTLFKGYQDLISRLDYSLRSRQPNPGDTPESPNQNISTLQRNEFLDRDMPQEQSYLSHLIMGGYPLFEKLQSLTAEEFEHYTLKEFYQVVTVKLTP	complement 33945..34961				8.86633e-125					no IPS match	no IPS match	no IPS match
	FSUB_100_gene_0.73	uncharacterized protein FPRN_11118	LCSLPEIFLSEKDVELLDGLNHHQRCDWKGDHACKSDKFVFGLRQEINSAVARIIEATEDQQVAASPMPTATETSADGKRKTHDLAIENLRVQIDISNSLRGLFEVQHRRQAHREAAAGNASALAHIDANNYPPIPPRVGPSTLPRSIGLLGLIDSDDEEEPSDNSESAKSAGKKRAAPGGSGQSATGGKRPRAK	19073..19948				1.11106e-65					mobidb-lite (MOBIDB_LITE)	no GO terms	no GO terms
	FSUB_109_gene_0.131	related to tol	MPVETIQPKRETTVAYPSFDPDAKGKCWICIKHAGFLEDHYPAVYERWLKHELLVTVQADFASLEQEAQPRTLHSPSDETLPPDSRGRQNLEVLVTQEDRPIGPYMTLSHRWSNYKYEKLTSQSLSRFRRSIDISCLPRVFQQAIEVTRLLKIRYLWIDSLCIMQDTACGDWKAEALKMGDVYANSFLNLSASYTAGDDENPFIFSPESWNHVLPSKIVLMDDKELRSNFFVDGDLWKDEVGESPLMERGWVFQERFLAPRVLHFGMRQLAWECNGGGALQMFPAGLPPRFEDNYKKDVCWPMMRPMNTLSSEEFCSRWHEIVTAYSACRLTFNTDKLIAFAGIAKLIQSAGRDEYVAGTWKSTIIADLAWWVYKANGRLPSGNQATHRAPSWSWLSLD…	1621..3562				0	C:GO:0016020; C:GO:0016021	C:membrane; C:integral component of membrane			IPR010730 (PFAM); mobidb-lite (MOBIDB_LITE); PTHR33112 (PANTHER); PTHR33112:SF9 (PANTHER)	no GO terms	no GO terms
	FSUB_113_gene_0.123	related to myo-inositol transport ITR1	MLELHADVRNFYQDTSRTLTGLGPYPTEQEVQDATATWQKKDNIEDAIREAIRKGNSDSGNTTSTVIPLNDAEKRALINEIDHSFSENGMWMVIFTVSLSDFLQGFVQSSQNGANLFADQWLTESGDPVNSQFAYANTAVYLSAAAVGCPLAAPMSSLFGRRGVIIVALFLIFAASVGSAWITLNDNAWLVLGSIRLIGGVGMGLKATSTPILAAETAVGSWRGSSVLLWQLWVSFGIMMSFIVNICLNQIDDKELKLRLILGSPAVFALMLMYTVAKCPKSFRCYLMPGSRKYSPEKASLFIQAVRNLYLTYKGIDSEFENEGHDRTKAATKPRTPAVEAVSHYVLQYWRILKVRRLRNAAITTGIAALSQQLSEINLMAFYGGTTLVGVGPGNHPSD…	complement 49806..52378				0	C:GO:0005575; F:GO:0022857	C:cellular_component; F:transmembrane transporter activity			IPR003663 (PRINTS); G3DSA:1.20.1250.20 (GENE3D); G3DSA:1.20.1250.20 (GENE3D); IPR005828 (PFAM); PTHR23500:SF292 (PANTHER); PTHR23500 (PANTHER); IPR005829 (PROSITE_PATTERNS); IPR020846 (PROSITE_PROFILES); IPR020846 (CDD); IPR020846 (SUPERFAMILY)	F:GO:0005215; C:GO:0016020; C:GO:0016021; F:GO:0022857; F:GO:0022857; P:GO:0055085	F:transporter activity; C:membrane; C:integral component of membrane; F:transmembrane transporter activity; F:transmembrane transporter activity; P:transmembrane transport
	FSUB_119_gene_0.131	uncharacterized protein FPRO_07072	MLDQEVLKSQSQPDDIPSSPATTLSNDNTSDGGSTTSLSKLDRYSDIEEEPADGSANQGVSMDQTDPASNEVAGLTKFTLKSLLLGEELKRLQVWKTSFSNEELDQLPTIDHEVAQSVLKCLTSVASILIDGSSQSFPPSHP	complement 98273..98701				5.14284e-77					mobidb-lite (MOBIDB_LITE)	no GO terms	no GO terms
	FSUB_122_gene_0.105	Vacuolar membrane amino acid uptake transporter fnx2	MVHNDDPQPQLVDERTSLLSSQSLVSDQGTIKTPQQDSQEVSSHGDISVARSVLPTIPFGIFIAQADSSIVLANSQEIASEFRFLSDASWLMISYVLAQCYGRTSNISGRKPAMIFSYAALTLGCIICGIGTSYWHVLLGRVVSGIGGAGMVELVTVIIADLLTPRQVATCRSYVNVVATLGRSCGGPLGGWLVDTVVGDGEQKLDLWLRQCLYTY	complement 76727..77565				1.08217e-95	C:GO:0005575; P:GO:0055085	C:cellular_component; P:transmembrane transport			G3DSA:1.20.1250.20 (GENE3D); IPR011701 (PFAM); mobidb-lite (MOBIDB_LITE); PTHR23501:SF106 (PANTHER); PTHR23501 (PANTHER); IPR020846 (PROSITE_PROFILES); IPR020846 (CDD); IPR020846 (SUPERFAMILY)	C:GO:0016021; P:GO:0055085	C:integral component of membrane; P:transmembrane transport
	FSUB_14_gene_0.48	Penicillin-binding	MSNRSVAAVYGGYGAIMEECAAAFSLKASASTIAKLTNGIAVSGIGRRKNGYRRGNFEGARTHVESNGDFDFAVVFNTRDFAFDQEF	complement 48158..48474				1.44439e-47					no IPS match	no IPS match	no IPS match
	FSUB_15_gene_2.124	Cutinase palindrome-binding	MPFPSPLSEPIDATIRCTRPRCQQRRASRTRAKSSSTSPPRRSKHDRSRLKCTDRLSECVGHPLGNVTVFQTSAIASALTNETESPHGKCHTDAPCYIPGDHESLHSKLHTDKAMCKPTGLGVSYKKPRPQSHSPKHQHHQRQNLRLWEMKLSQPINNRSCTSCQTENTPRWRQGPAGPRTLCNFCGLIYAKRQQKHADAPSSHCLSSD	220530..221202				5.34852e-100	F:GO:0003677; F:GO:0003700; P:GO:0009058; P:GO:0034641; F:GO:0043167	F:DNA binding; F:DNA-binding transcription factor activity; P:biosynthetic process; P:cellular nitrogen compound metabolic process; F:ion binding			IPR000679 (SMART); IPR000679 (PFAM); IPR013088 (G3DSA:3.30.50.GENE3D); mobidb-lite (MOBIDB_LITE); PTHR10071 (PANTHER); PTHR10071:SF244 (PANTHER); IPR000679 (PROSITE_PROFILES); cd00202 (CDD); SSF57716 (SUPERFAMILY)	F:GO:0003700; P:GO:0006355; F:GO:0008270; F:GO:0043565	F:DNA-binding transcription factor activity; P:regulation of transcription, DNA-templated; F:zinc ion binding; F:sequence-specific DNA binding
	FSUB_152_gene_0.41	mannitol 1-phosphate dehydrogenase	MSTPKPLKVAIVGGGISGICLAIGLLEQPQLELTIFEASPTFTEIGAGLALGPNAQRALQLLSPEAEAAFWHFATGNSSPEFNKTWFNFRRQAQGHEDGLELGSIENQSGQQTVHRAKFLDALINLVPKDRVQFGKRLLRISDHGAYTVLHFADGTAARTDCVIGADGVHSTVRKYLLGATSPEATPVFSGIVAYRGLIPMEIARHSLGKYASDAYLWCSSEGMVMSYPINSGQVVNVVAACYRESWNEKLYVLNTTLEQMRKDFQSFEGIPQEIIKVYPIAMPSFFDDPRLTFDKLLGKPMIWAMLEHLPAAQYNTKNVAIIGDAAHQSQAACMAIEDAAALGILFNKTYFKGDVSEALSTYEKVRLPRATKVQAAAARASENINERIGFSSNVENPI…	complement 49304..50611				1.12063e-159	C:GO:0005575; F:GO:0016491	C:cellular_component; F:oxidoreductase activity			PR00420 (PRINTS); IPR023753 (G3DSA:3.50.50.GENE3D); PTHR13789 (PANTHER); PTHR13789:SF271 (PANTHER); IPR023753 (SUPERFAMILY); SSF54373 (SUPERFAMILY)	F:GO:0016491; P:GO:0055114	F:oxidoreductase activity; P:oxidation-reduction process
	FSUB_152_gene_0.57	pisatin demethylase	MRWEFLDKQQAALVLALGITSILIHHLFSKYYRLYHIPGPLIAKLTDLHRFFCVRSGFIHLYHAKAHERYGPVVRFGPNMVSVCDPDAIQMIFHKRNGFDKACGSDFTQNHFRCHYLTKTEQHVSPWTPDGLLLSVFTANNDEKNRRMKQHIAMYFSLSYVVSTFEKRIDRTINMFLNQLAQQFVATGASCDLTQWFKFFSYDAMGQMTFSRAYGCIEHGNDSIGIISDVKNTMLAIGPSHEHKHNHDSMRLSCEKMTQVPWLDWLLHKNWLLNSIKPEPVSCLLMYVLKRIAERKNNPTKFHNKVDAGPDLNSDFLGYFIQAQEKESNEVPPRFLSTWTLANILGGSDSTASMLRSVVCFLVENPDALQNVRDELQNKQRDVTGFSLPVPKWNELQNL…	complement 46502..48252				0	C:GO:0005575; F:GO:0016491; F:GO:0043167	C:cellular_component; F:oxidoreductase activity; F:ion binding			IPR002403 (PRINTS); IPR001128 (PRINTS); G3DSA:1.10.630.10 (GENE3D); IPR001128 (PFAM); PTHR24305:SF138 (PANTHER); PTHR24305 (PANTHER); IPR017972 (PROSITE_PATTERNS); IPR001128 (SUPERFAMILY)	F:GO:0004497; F:GO:0005506; F:GO:0016705; F:GO:0020037; P:GO:0055114	F:monooxygenase activity; F:iron ion binding; F:oxidoreductase activity, acting on paired donors, with incorporation or reduction of molecular oxygen; F:heme binding; P:oxidation-reduction process
	FSUB_155_gene_0.67	ATP GTP binding	MTASTAAQDIDLNSIEQIEMLLQNIQRKPQSYDLAEGALLSTINLSEEKLGKDHSITIHAAFELAKFYRVKRKFAMAESALSRVLEDCERVYGESHVITLQTMCELAQTLDNQKDLERCKAVLLQAYTRYRDSNPYGTEALFCGVHLAHTLEALGMYEDAGLLFLDLVEKYRQANTIQNGLGLNCVSSLISNYCKKAYRLFQGIWKNDDDKKIARGYFFDCVALCQIIASNEGKEAQETLYYNLWPIGKIALWLGDDDTFQNCVWFLDSTKSPSSSRQFRIVCDGCNQQLSSGYHYVCQQCEDHDLCLECFTAQRGQFDTNSESCRDHFFFEISTHHPSTEESEKVGVTTVVEWLSSLLAEAALQDWQSEAAKAGGEEMPLNIDDWNDRCPKDISGPAP…	complement 21770..23107				1.73201e-09	F:GO:0003676; F:GO:0003777; F:GO:0003824; F:GO:0004523; C:GO:0005871; P:GO:0006629; P:GO:0008152; F:GO:0008270; P:GO:0009116; C:GO:0016020; C:GO:0016021; F:GO:0016788; F:GO:0043531; P:GO:0090502	F:nucleic acid binding; F:microtubule motor activity; F:catalytic activity; F:RNA-DNA hybrid ribonuclease activity; C:kinesin complex; P:lipid metabolic process; P:metabolic process; F:zinc ion binding; P:nucleoside metabolic process; C:membrane; C:integral component of membrane; F:hydrolase activity, acting on ester bonds; F:ADP binding; P:RNA phosphodiester bond hydrolysis, endonucleolytic			IPR000433 (SMART); IPR011990 (G3DSA:1.25.40.GENE3D); IPR011991 (G3DSA:1.10.10.GENE3D); IPR000433 (PFAM); IPR000433 (PROSITE_PROFILES); SSF57850 (SUPERFAMILY); IPR011990 (SUPERFAMILY)	F:GO:0005515; F:GO:0008270	F:protein binding; F:zinc ion binding
	FSUB_156_gene_0.85	hypothetical protein FOIG_16087	MDKKGELVHVTGDTLDRFVLHSTLLRLIDPVRGKPTRSTLDENPDDSFLGAWQLQKKFLDSFALICSTSSSGAETATAVCLEIHDEKIGKILRLARNHGLTPEDLAELQRVLKVLQEVSRRETPSPQAETKVLQLVAELDKGRILSIAERIEKRGIRQFLQKAQFGVYGSQLQSEKLRIWLESCPFTASASRIQNWTCETIIKLINWASEARWQYAEQLRTLLKLDESQSQSWLDNLHKVARYHSAIKSMVKFAMKEPGIFANIAIRPINAPRQRRFKLPKDEPPLLAIVRTLIGKDTNSTMEKLEKHLGTHDVEARLRRACPPMLTLHAEMQIVVFYESNPGVAPHLRLIGTSKKACFLCDKYLRHHPLRLQASACHQKIYPSWMPPPYYNVPGNSAK…	complement 18387..19852				0					IPR023109 (G3DSA:1.10.150.GENE3D); IPR027796 (PFAM); mobidb-lite (MOBIDB_LITE); PTHR42037 (PANTHER); PTHR42037:SF2 (PANTHER)	no GO terms	no GO terms
	FSUB_158_gene_0.54	uncharacterized protein LW93_10063	MWFPTTADTPKLIDALRKLGVNDSTSDSASTCTIRTSETTYYSARTSPDSDSLLDVISIASTCTTVTLDFISILGAEVDRALDPSEGLVSGAQAITEDPAFEDYEVPVYYDVIHCITSSSQVTWKVGLYSDSQMCHAWYVEREIESYLRSGKNTGIAGCLL	complement 7741..8430				1.76923e-37					no IPS match	no IPS match	no IPS match
	FSUB_165_gene_0.32	lysr family regulatory	MSTTDIVFPLHEFDDSTINRYMQHWTLRFDAILDTEKLCTALTHLLSLGDWRKLGGRLEFNKVGKLEIHAPRTYSHKRPAFQFSEETFSVKTTDHPIAKHLPRAKGKPELFSGITSQFNPLTLGPDWALDFTEHIRRQEPIIGVHIALFSDVTLISIRWVHVVCDFMGIKALVLAWSTSLHGRYDDIPPFMGAYDDPLKNIGSVPLKEPYALADMQLSPQAFEKTYETYLEHVAKYPTSVRRMLVLPDNTLQRIKMDFIGGHGSDKLEVIPKGALFNGQFVSDADILAAWAARLCCGVLPVSDRPVHVMGMYEARHCLPETFPQRKDKPDSSPVFIANATFSTSTNTTLQALRQQPLARTALLVRESVATLTKAPQVHAQLHLLRETYAKDKENPPVFA…	48343..49851				0					G3DSA:3.30.559.10 (GENE3D); G3DSA:3.30.559.10 (GENE3D); PTHR31896:SF17 (PANTHER); PTHR31896 (PANTHER)	no GO terms	no GO terms
	FSUB_169_gene_0.65	related to oxidoreductase	MATQTGIIIEGVNKPHKVVDSILRPSPEGRQVLLRCLAVGLNPIEALQHHTGMMVNEWPAILGSDGAGVVVEVGPDVSRLKVGDYVYSCASVGQNRFTPFQDAYLAREDLLFMRGNNISLEDSCTIGACLLTSSICLLGGAGLELHDDGNRAQEKDEWIVVLGGTGNVGQFAIQLGKVCGYKVLASCSPSKQYIAVRNGASATFDSRETIDAQVAEIKKMTGGNFGKMMDASTYGYKVMVKALETASNAKEKYLASVDSWSPFSTPSSINEYRADLGHLCRPNERDGTQITSDIANWIPLLEKRIAAGTLKPLEHHVVDGIGWEKVIQGIQDMESGKIGKKIVVRTQEE	29076..30385				0	F:GO:0016491; F:GO:0043167	F:oxidoreductase activity; F:ion binding			IPR020843 (SMART); IPR013154 (PFAM); G3DSA:3.90.180.10 (GENE3D); PTHR43006 (PANTHER); PTHR43006:SF2 (PANTHER); cd08249 (CDD); IPR011032 (SUPERFAMILY); IPR016040 (SUPERFAMILY)	F:GO:0016491; P:GO:0055114	F:oxidoreductase activity; P:oxidation-reduction process
	FSUB_17_gene_3.164	hypothetical protein FOC4_g10014528	MCRNAMDCTGLPLTLRPPADGRAPHSFAEPCRGGGGQEMVSMVSSRNVTKTRRIGLAPKWFRDGSRAEAELSSKPHRNATPDHITFMSGNDLTEPRGRAGMFKQYYPERSSYNVSKCYSHYYFNVPSAFDHWTDQLSLDRLLTAPSDLATGSVMACNPFASTALWTPRQSGWI	365342..366069				2.24726e-49					no IPS match	no IPS match	no IPS match
	FSUB_173_gene_0.30	---NA---	MDGFDGRWVSKVPISGRDCRLQSLINYTIVVLDDDDDDDDDDGAYNQTMAAESLKRALIDESGREH	complement 32413..32613									no IPS match	no IPS match	no IPS match
	FSUB_179_gene_0.30	phosphatidylserine decarboxylase family	MTSVTFTNESFARKLQSQTLGLWLPRDKKTILQWVGQKVEQLATQNLPMNPNVQAFSDYVEGNNTLRSLAQLMFTEVPPDYHNGTDPVGAPQIRDFATFIQVLNTIIVTGPEFFEVDDPDAMGLIGFPINAVLDWPMGTKSGWAFWYLPEVNQKFQPILHDFETFLASSASKVVLKAPNGWLGPKGQAMIVAKANLDGLTRTFTQIFDCPDPSDPIYLGFESWDQFFTRTFMPDLRPVVQPMNTSILNNSCESGPLQYKKNVKATDFFLLKGQPYSLNNMLNSNESYVKQFANGSVYQAFVSALSYHRWNSPVNGKVVDVFNVPGTYYSESPFQGFPNPDANGPNNSQPYISSVATRGIIYIQAEGPIGLMAIVYVGMAEVSSCQFTVTKGQTISKGDQ…	complement 34489..35859				0	P:GO:0006629; P:GO:0009058; P:GO:0009058; F:GO:0016829	P:lipid metabolic process; P:biosynthetic process; P:biosynthetic process; F:lyase activity	EC:4.1.1.65	Phosphatidylserine decarboxylase	IPR003817 (PFAM); IPR022237 (PFAM); PTHR10067:SF8 (PANTHER); IPR033177 (PANTHER)	F:GO:0004609; P:GO:0008654	F:phosphatidylserine decarboxylase activity; P:phospholipid biosynthetic process
	FSUB_185_gene_0.19	---NA---	MPYRELFGKQAKGQSINQADIEGAPCQLCGIVTAGGAMGRQESTETKSSYLDTLKQKFLAVCRYRILVETVTTTILASAYAQTVGTYCYLVTVAVSAT	15554..15850									no IPS match	no IPS match	no IPS match
	FSUB_204_gene_0.13	dead deah box helicase	MASTDKKPSEEALLNWYKGLQPLTVDIVGDFAGRELFLIHGEALMQYCLIEARVDFDKGFQLLHAIQAVEKFLVNLKNGDCNFDIVFFRDFENVCASEGSAGSKHPYKYKLTRRILIQHLTRGIADFEILEFDSFDSQECRAYLANNAVHFMLCDDGRGVSLDQSVRLRHLIWKVISSGRNVALINSISWKSSKIFMPLLSGSKGMLPDLYIDTPTCETKPSADLSQKVLDETLRLSIESSDLSAREKFAAVFCRVFLEQSSKEGEISGVDLELVEALLLHMAALRACHLQNRNIHPERFSKHVVDNYDTGFVQLFCTASQNLAENGYAVTRQAEWDLFDLFDGRIFFYILQSIRDGSEFPMPIVDRAKVLSATAFGHRSMDGRGLFMALKASESNLPP…	complement 5574..11208				0	F:GO:0004386; F:GO:0043167	F:helicase activity; F:ion binding	EC:3.6.1.15	Nucleoside-triphosphate phosphatase	IPR001650 (SMART); IPR014001 (SMART); G3DSA:3.40.50.300 (GENE3D); IPR011545 (PFAM); G3DSA:3.40.50.300 (GENE3D); IPR001650 (PFAM); mobidb-lite (MOBIDB_LITE); mobidb-lite (MOBIDB_LITE); PTHR12131:SF10 (PANTHER); PTHR12131 (PANTHER); IPR001650 (PROSITE_PROFILES); IPR014001 (PROSITE_PROFILES); cd00046 (CDD); cd00079 (CDD); IPR027417 (SUPERFAMILY)	F:GO:0003676; F:GO:0005524	F:nucleic acid binding; F:ATP binding
	FSUB_210_gene_0.18	heterokaryon incompatibility	MRLLSAKGLFFKEFPGDKIPKYAILSHRWEGEEPSYSDMKTRVTHRDADVLGAGPLWTERNYRKIYQFGLMASQAGYEYIWVDTCCIDKSSSTELQESINSMCRWYMESGVCYAYLSDVTISADVVTHKTGSAGSKPWTESFQNSQWFTRGWTLQELLAPRELIFYDKNWHMCGNRVELQDAIQAATGIDGTSLIKASYEEGAYLRSLRSGRLFTWAASRQTTRCEDRAYSLLGMFNVNMPLLYGEKDRAFYRLQEEVIKVNEDVSLLA	complement 9159..9968				3.55515e-172	F:GO:0000166; F:GO:0005524	F:nucleotide binding; F:ATP binding			IPR010730 (PFAM); PTHR10622:SF14 (PANTHER); PTHR10622 (PANTHER)	no GO terms	no GO terms
	FSUB_210_gene_0.28	hypothetical protein FOQG_19051	MAVLQENIDPNGDTLIIFSYLAVPTQSADEPVPAEEQAATAELLAVEEPAAVYERDHIDGHSTISSIDRTTHCHEGDESVSELRLKVSKKHLTVASRRARAMFQSDYRETRKTEVDGLYHWEIGPLFDPEAFRIVMQVIHVQAQDLPDEVTLQMIVSIAEIVDDLQCHDALSFFVKVWINRLSESVPSHMCDELVQWIFVASVFGLDEKFKQATRVAIMCSTGPIDLLGLPMRPDIVDKIEQRRQDLLEDLIAQLNAVLDNLCLDRSCRVLACRLMMLGALTHQMKNTNLHSPRTVRPFRNQSLSSALEAVRHFDSPSLYLPSEDISHYPFDHFDSSFQGSKEDVWVLQKDAPSSSRRKKKDRGLFDEEDDDEELNKTPRRLKFHCCRLQAYLKPVIDL…	complement 21478..22827				0					G3DSA:3.30.710.10 (GENE3D)	no GO terms	no GO terms
	FSUB_22_gene_0.25	related to sugar transporter	MSPSHIRGLLVGIHGGMIGTGYALASYVGLGFYFVKASGAQWRIPLAIQCLPSLLLAVGILFLRETPRWLILVNRIDEARDSFNYTRLGRRGGTTSDEETTDADFETLRRQTICETEQNITFLDLLKTPSMRKRCITGFLTTFGCQATATIVINNYGPLLYASLGFNTVQQLLIQCGWITVAPFGNFINAFLVDHVGRVKMLLGGFAGCIVALIGECITMSVFEKTNHRGAASGAVFFLFLHVTIFTLCCDATSYVYASEIFPTPVRAKGLSISVSGLFFATIIFTTAAPTAFAAIGWKFYLVFIGTTSIIIAYAYATFPETSKMSLEDIQELFGDPIEGMPTEVAKQETVHHLGKDDEKKSINVGELST	complement 10571..11918				0	C:GO:0005575; F:GO:0022857	C:cellular_component; F:transmembrane transporter activity			G3DSA:1.20.1250.20 (GENE3D); G3DSA:1.20.1250.20 (GENE3D); IPR005828 (PFAM); mobidb-lite (MOBIDB_LITE); PTHR23500:SF322 (PANTHER); PTHR23500 (PANTHER); IPR020846 (PROSITE_PROFILES); IPR020846 (CDD); IPR020846 (SUPERFAMILY)	C:GO:0016021; F:GO:0022857; P:GO:0055085	C:integral component of membrane; F:transmembrane transporter activity; P:transmembrane transport
	FSUB_22_gene_2.94	---NA---	MGILPVGIGRLTKLNRSLPEERQASPPPRTVLDTPAAKPSGSHHRSINGGATGIAIIRLPMHSVEKV	complement 196787..196990									mobidb-lite (MOBIDB_LITE)	no GO terms	no GO terms
	FSUB_227_gene_0.71	amidase	MAEVNWQQLINQKRATREALIPEQWLLPATITSKVTPQSTASAFELLSEAGLLTEREIDITEKYTAVSLTAKIATGELSSYDVATAFCKRAAIVHQLTNSLTEIFFDKALERARWLDEYLSKEGKTVGPLHGLPITLKDMIHVKGQYSTMGFVGHLRHPPADENAVIADMLEAAGAVFYCKTNVPQTLFVCESFNNVFGRTLNPYKLCLSPGGSSSGEAAQLGLCGSIMGVGSDIAGSVRVPAMFTGVYGFRPTVNRLPWSKQAELALKGWQGVQPTLGPMARTAQDLTLFMKTIIQAEPWRYDSTALAIPWHDAPRKDKLTIGVWSQDPHFPVFPPIARTMASAVGRLRAAGHTIKIIEAPPTMKAMKIAMRWFALDQVNLPLKFVQDGAESPIADLD…	complement 18030..19896				0	F:GO:0016874	F:ligase activity			IPR023631 (PFAM); PIRSF001221 (PIRSF); IPR023631 (G3DSA:3.90.1300.GENE3D); IPR000120 (PANTHER); PTHR11895:SF109 (PANTHER); IPR020556 (PROSITE_PATTERNS); IPR023631 (SUPERFAMILY)	F:GO:0004040	F:amidase activity
	FSUB_23_gene_2.167	carboxyphosphonoenolpyruvate phosphonomutase	MESNKLARTLNSLHIPSQPLMSVNVWDLASLGMVFRLNREASKPVKAIATASWAIAASLGIKDEDLVMYSRI	complement 242693..242911				4.50025e-22	F:GO:0003674	F:molecular_function			G3DSA:3.20.20.60 (GENE3D); PF13714 (PFAM); IPR015813 (SUPERFAMILY)	F:GO:0003824	F:catalytic activity
	FSUB_24_gene_2.142	related to C-3 sterol dehydrogenase (C-4 decarboxylase)	MESSKRVLVTGGSGFLGGHVVRQLLSDTGTTVAIVSRHPKMPGDVADESRVSLHAADLTVPSQIEQVFKTFKPYAVIHAASPSYIDTPANLIKANIDGTKALLEAALACANTRAFVFTSSDSAVIPTQEPLSEENSVLYDETNAPNAYAMSKAAAERLAIASNSGQLWTAAIRIPATYGEYDMNFVRQLVQSIRRKEHKMQVGNDTKIFEFLYVKKAAAAHILAMKALLDLEMREKAGGQVFFISDGRPQKFFDFSRKLYAAAEYPVALEEVTKIPFFMMQAMASTAEWVYWIMTLGYIKPGMRRTAIDHLDSGCCWSLDKAKRVLGYEPVADQDEAIKKTMEWALKAL	328767..329816				0	P:GO:0006629; P:GO:0009058; P:GO:0009058; F:GO:0016491	P:lipid metabolic process; P:biosynthetic process; P:biosynthetic process; F:oxidoreductase activity	EC:1.1.1.145	3-beta-hydroxy-Delta(5)-steroid dehydrogenase	SM00822 (SMART); G3DSA:3.40.50.720 (GENE3D); IPR002225 (PFAM); PTHR10366:SF503 (PANTHER); PTHR10366 (PANTHER); IPR016040 (SUPERFAMILY)	F:GO:0003854; P:GO:0006694; F:GO:0016616; P:GO:0055114	F:3-beta-hydroxy-delta5-steroid dehydrogenase activity; P:steroid biosynthetic process; F:oxidoreductase activity, acting on the CH-OH group of donors, NAD or NADP as acceptor; P:oxidation-reduction process
	FSUB_25_gene_1.2	uncharacterized protein FMAN_12390	WLSDILSASAMPCDSTHTDTVHKGDTPPNTTEAKMLESYIHDTSSLQDRLLMRSMAEDNKATGNGAGYSGPKDSKL	complement 104174..104460				7.01118e-36					mobidb-lite (MOBIDB_LITE); mobidb-lite (MOBIDB_LITE)	no GO terms	no GO terms
	FSUB_25_gene_2.21	hypothetical protein FOWG_00202	LSPRLLIIWTDYHKHIFFTFDCRPSTMAASTSRPTVVQLVSRDRAVATSVSISSTTIDQLLFAEKPDVPYPSGSEKLYHAVEMAERYAYDDSAPHIPQNLRGATPNQLKTDGKLRLYAKEQGFIVSINPRLTHGMVLFMKGHIQVFAIVPMIFLRQGSAFRTLADKTADNVPLLEAPVIDLKPQQADNLFDQTVRTLWNLTSQPESLRKLRELLMPEEDIVGYFTTPRDNVDSITNALLPEVREVLQSGEFSLRDLTDLRHYSADWPSNQASCIYLRIYIKRNDRPGPYSDTSQADINGNVGMYFGQTRNLRNRLYAYERTMVPGSRSPHMMFALKCSPEDRHTIPIMIWEDGDVSSHILKMAEQTMILLLRSYQRYLFVPDDHMSSGQVVNSRCAKLL…	complement 245729..248254	FSUB_37_gene_0.24	MSLATTVEQPLLRVAPTVPWPSVGAIRNLPAVIVAIDYGYVDTLDSVPSNIRGRIPRQIKDGERLMIWKGEMGYLFGRNPINSDVLVLIFKGALQIPVVLPSSIVVEGRPFRDLTQQTTDLLGPTREPQVSIRSHPNDRALQKFIRSFVLSTSRQQGDLRLLGLSPSEADELFMGSNLDNNVDALLEAILPEAKQTLEDGRFSLQNILEIRHASIDWPGDRPCIYVRIYTDPEDQPEDESRDEAQADIDQYVGVYVGQSRQAWVRHLEHERNIEFHVPAHGKTHYNTAVKSLPEDRHTIPLLVFEDRSISSILLNMAEQVMLNALRAEARWIFAATPGNAMKYMLQRRARLFSDTARAVRSQVNWPRLNGQGLNVSSPLLEERYQVHLHCIPMATRGGP…	84518..86872	0					mobidb-lite (MOBIDB_LITE)	no GO terms	no GO terms
	FSUB_260_gene_0.3	uncharacterized protein FMAN_15264	MDPASLAIGVIPLVIQLLQTAKSIRDLATVYKSAETQLKSLLNKLDYIETICNSLIELLPGLEDDYRSRGPSGENLLSSLYRIISACYEKVSHIHGTLVIIYAKQKPSRNPLKTIGSRFLLHRDQVQACTDELDGLLSLLQLQITSVTLALRITTPQTIVGPSFATTGSPDTSGRTCSEAALESSGLLRSRGHRSQVTIETWRQCWEGVAFVQRTKEQTKSAILASPEFSTIQNESTFTLGISLLNWHVKFSMRQGALSPSSFSFQLPRVISICNRGSIFGRGIEQAFVKDNLEKVQELFREGTLTPATILSTFDYDPDKETSLLGVRSPFNCQMIDFLIHKQLAVLTRASRLLEFLMNQTADIFTRSHLCSHSFSYVLNHAEDTTQVIEYINLRKDFI…	complement 14783..16962				0					Coil (COILS)	no GO terms	no GO terms
	FSUB_266_gene_0.11	non-ribosomal peptide synthetase	MPVRTREISSRMVSGRYKQIKVDGRKVLKCRQLDAPSWESGAGGPQTLHGPKDEKRELQEGEYGKCNQLWSEASPWPHLSRTVSRTTPRRMVTVQGMIVRMVSWKNNVKSNPPRQLSGTLGPKEFWRVGWVYCGTVSSGTTRMLQVGNMNMKPKSDTDTAVHQMQQLWQSVLATEQPISLGDNFFELGGTWSAAVLASMKAADKGLSFGAEDLYEHPRLCDLVKSCRVGAKPVTSATVWSDEDPASSFPAGPSPSGEAIWQTCDAEPQLFWHPTGRLKAPPNLIRAAWALLLGKYEDAVKVAFGTASSEAPMSPVVFAWDYDDKTEAFLDHVQQLNKNASESITTDQNVRCGVRVTTVLDASEFDDTCRRIRASSPLLALDIHCLLSADRVSLIGGSYT…	6302..31647	FSUB_309_gene_0.3	MHFAKPDMTTSAESKDGVPWSCSADGPHSSDDHSVVSFHHREASITMENLTQFCKTHDTTPQSVYFTTWSIVLYHMTGQSDVSIDVESHSASALAERPGCQTYNMILRSAMTPLELISQYKFPENPSSIEKGTKRSSDSNIKDRHMFKMIQDAGVFQDEHNKFASSSLDYLSYVHLLTESDTATLRIIWRSGLQDLEEITNIFEHTYNCILSQPDASLQSMSSPTLSQLELLPAGPGQGPSLNIPDLLRLTSSTFPSKTAISAWDGDLAYHELQNTSDRWAKALLSHGLTAGDSVIHAFQHSQCAIVAWLAILKAGCTCVPIDVPTPTERLKTIIDSTTCKAAICDSTGSSHLGSTSLSLLTPSDLDGSETKDVIDVAEVSISSTAVIIFTSGSTGQPK…	complement 1820..5627	0	F:GO:0003824; P:GO:0008152; P:GO:0016539; F:GO:0016740; F:GO:0016874; F:GO:0031177	F:catalytic activity; P:metabolic process; P:intein-mediated protein splicing; F:transferase activity; F:ligase activity; F:phosphopantetheine binding			Coil (COILS); IPR020806 (SMART); G3DSA:3.40.50.980 (GENE3D); G3DSA:1.10.1200.10 (GENE3D); G3DSA:3.30.300.30 (GENE3D); G3DSA:1.10.1200.10 (GENE3D); G3DSA:3.40.50.980 (GENE3D); G3DSA:3.40.50.980 (GENE3D); IPR001242 (PFAM); IPR010071 (TIGRFAM); G3DSA:2.30.38.10 (GENE3D); G3DSA:3.40.50.980 (GENE3D); G3DSA:1.10.1200.10 (GENE3D); IPR000873 (PFAM); IPR009081 (PFAM); G3DSA:1.10.1200.10 (GENE3D); G3DSA:1.…	F:GO:0003824; P:GO:0008152; F:GO:0031177	F:catalytic activity; P:metabolic process; F:phosphopantetheine binding
	FSUB_278_gene_0.10	Tryptophanase	MSQVISMPTFTVAAVRQTEQVPRDVRERILRSVQYNVFAFPAALVVADFLSDSGTGAMTTNQWSAIMQGDESYGRNCGYYYFLEAVRDIFERGEHRLNAFQEMRPDLKTNTAFERYLEYQEKGFVNGGLAQMTRPNFFLVPQGRCAESLLFQATAHAFSQPNSQQPIIISNGFFDTTSGNASAAGFRLITFAQEGWMHSQPIQDWQNKNTFKGNMDISAAERFLSNRDQQGRVALIILTITNNFAAGQPVSMENIREVSRLSKEFNIPLIFDACRFAENAMFIKRYESGYKDSPVPEIIREIFSEADGFTISLKKDGLANMGGILCLRDGGKYTTKYQGIGTAIREQQILRYGNDSYGGMSGRDLMAATVGLYEGTKESYLSSRLDQVNRFAERFAEAR…	3811..5409				0	P:GO:0006520; F:GO:0016829	P:cellular amino acid metabolic process; F:lyase activity			IPR001597 (PFAM); IPR015421 (G3DSA:3.40.640.GENE3D); IPR015422 (G3DSA:3.90.1150.GENE3D); PTHR32325:SF5 (PANTHER); PTHR32325 (PANTHER); IPR015424 (SUPERFAMILY)	F:GO:0003824; P:GO:0006520; F:GO:0016829	F:catalytic activity; P:cellular amino acid metabolic process; F:lyase activity
	FSUB_278_gene_0.5	related to VBA1-Vacuolar Basic Amino acid transporter	LTHTIMSDLESSLVVSWLGASYLIATALVQPLSFALGNFTCSIAESLAFLVVGRALSGIGGGILTIMATIVLTDVTRTEARGLWQGINNIVFGFGHGSGGLFGGLVAHRWSWRVAFMSLSVPALLIMLGATLLPEPISRHNQIADNASAAEESTATGNEDVPLLPKLNSSGRKVDTMGTILLSLGLGSLLASSQQLEFGSSNLDLRLVAFGFVISFIMLTAFSYHSVFMTKDALLPLGLLTKSPSVGYSCLVTFLSQFGFTISEFYLPYYLSLQEHTKMEVVGWCLVPLSVGAAAGSFLAGFLTSRSNTSHLLLGSSAVAFIGTLGVLLTPHKTYALTYQLVSIFLWGLGFGGLATASLVRMLDSTEVNKQASATSLLYTSRSLGGALSLPVASFVFHM…	complement 1146..2666				0	C:GO:0016020; C:GO:0016021; P:GO:0055085	C:membrane; C:integral component of membrane; P:transmembrane transport			G3DSA:1.20.1250.20 (GENE3D); G3DSA:1.20.1250.20 (GENE3D); IPR011701 (PFAM); PTHR23501 (PANTHER); IPR020846 (PROSITE_PROFILES); IPR020846 (CDD); IPR020846 (SUPERFAMILY)	C:GO:0016021; P:GO:0055085	C:integral component of membrane; P:transmembrane transport
	FSUB_278_gene_0.9	salicylate synthetase	REIDWSFREQDHCWYCGLGCQSSLVIDSPGTSESMLNEGHKQKVLASSSLDQVAQDSVKLTIKRYFGYRYATHTRGIPYTPEWASLSLMVPRHQIMIASDKVIVQGQETEAFRHLDDVVVSAHICNMQRPQSMRVDISQRFPQYTTAVERTLSKVRGSQVMKTIASRAISLPERVDMLATSLVRRESNTPKFLFLSTIPDVNPLELIASLEHGIIITEPLAGTRVCPEDLVEPIRFRNELENDPEKIMEHIMSVEDAIAELQYICAHESVEAEDLMSARIRRKVQHLGLRITSIS	complement 8916..10047				2.61227e-125	F:GO:0016829	F:lyase activity			IPR005801 (G3DSA:3.60.120.GENE3D); IPR015890 (PFAM); PTHR11236:SF26 (PANTHER); PTHR11236 (PANTHER); IPR005801 (SUPERFAMILY)	P:GO:0009058	P:biosynthetic process
	FSUB_279_gene_0.11	hypothetical protein FOXG_19039	MDLMQALLSTFTVQCSTAQEPGSFNPRPPALRQGPLTIDWPPFDLRKSTLYMGPATVRIYV	2314..2499				3.03026e-15					no IPS match	no IPS match	no IPS match
	FSUB_309_gene_0.20	glutamate decarboxylase	NPELLFEDLPTDALGKGMPALAVKSGIDRLLEHDIEPERNLGSFVSTGLNDIGESLLLENYQRNLACQGEYAGVRRRANLRDEQMSKVLILHRIHDRCVAILGALWRSSCNEKPTGSAVSGSSEAIFLGILAMKRKWQAENGGIVSPNGSALNIITGSHAHVAVTNAARANDIEIRTVSVGPESNYSFDPSKIQGLLDNSTIGVVLTLGNTYTGHFDPIENTSIVLDNYEQSYGRSIPIHVDAASGGFVAPFNGGKSSRWDFALPRVVSINVSGHKFGLTAAALGWIIWRDRKFLPADLLHESSYLSGHHELPTLRYSQSSSNLLIQYYQLAHLGHQGFEIVIQDLLERSSALGKTLEETGMFTCISESHRTLANTLPVVVFRVNSAVQDQRPDFTEQW…	6823..8427				0	C:GO:0005737; P:GO:0006520; P:GO:0006950; P:GO:0009056; P:GO:0009056; F:GO:0016829; F:GO:0043167	C:cytoplasm; P:cellular amino acid metabolic process; P:response to stress; P:catabolic process; P:catabolic process; F:lyase activity; F:ion binding			IPR015422 (G3DSA:3.90.1150.GENE3D); IPR002129 (PFAM); IPR015421 (G3DSA:3.40.640.GENE3D); IPR010107 (PANTHER); PTHR43321:SF1 (PANTHER); IPR015424 (SUPERFAMILY)	F:GO:0003824; F:GO:0004351; P:GO:0006536; F:GO:0016831; P:GO:0019752; F:GO:0030170	F:catalytic activity; F:glutamate decarboxylase activity; P:glutamate metabolic process; F:carboxy-lyase activity; P:carboxylic acid metabolic process; F:pyridoxal phosphate binding
	FSUB_34_gene_1.37	probable CYB2-lactate dehydrogenase cytochrome b2	MRTSTIIASLAAAVSAYEPWLNEPDTGLNTYLASTNWTEGSRPLLKDIRGVPDFDFAARQVLTDQQYAFYRTAAAGEWAYRNNLKVWEKARLRPHQLASVKGLNETLGVTILGHNFSAPIFISPAARAGYGDSDRGELNFVDAAADEDILYVAALYATKTIEEIGAQRKKRGNTIFQQIYSNANLSVTWDAMKRAEDQGVRAFVWTIDAPATSTRHRAARYDTTNANGATSVLSWDLFKEIKSHTKLPIILKGITTTEDALRAVEAGADGIWLSNHGGRQVDYSPSPLEIAYELRRNAPEIFKKTEVIADSGVRYGSDVIKLLALGVKAVGLGRPFMYSNVYGVEGPKKLIQILKTEILADAAQIGITDLHNIPSKVLNTRALERDVYLMNEN	complement 158140..159470				0	F:GO:0016491; F:GO:0043167	F:oxidoreductase activity; F:ion binding			IPR012133 (PIRSF); IPR013785 (G3DSA:3.20.20.GENE3D); IPR000262 (PFAM); PTHR10578:SF97 (PANTHER); PTHR10578 (PANTHER); IPR008259 (PROSITE_PATTERNS); IPR012133 (PROSITE_PROFILES); SSF51395 (SUPERFAMILY)	F:GO:0003824; F:GO:0010181; F:GO:0016491; P:GO:0055114	F:catalytic activity; F:FMN binding; F:oxidoreductase activity; P:oxidation-reduction process
	FSUB_342_gene_0.7	---NA---	MAVLTTSGTMFDLGYPSLTAPLKYIFDSIWHEKARFKPAGEQVLMSRPDSSIDMEALEAFPKITPNGA	complement 11217..11423									no IPS match	no IPS match	no IPS match
	FSUB_344_gene_0.6	HET-domain-containing protein	MSRLKTCETSHYKCRPHGSNFTPSRLLSLSQCQDGSLSVRLQDMLKAQHLAGASLYTALTYCWGGHQELQLNANTTAALMKGLPVSGLPRKLQDAVLATQNLGLKFIWIDCLCIYQDNPQDIALEIAQMSKIYMYSFITIPAARAKHSNEGFLHDISVPPISETSFRLLFACPDKKLGSVILSKGLANSPIGDRAWTLQEYILSRRVLQYTNAGLHWTCREAVEFRQDDACLALDYLGPFKDSHRMFQGFYESNKGCRNWMNIVEVYTKRELTYALDKLPAISGVAETWAQALDDSYLAGIWLSHLPEALLWTSAQPQSQSKQPAEYVAPTWSWARLVVQVDWFDSTPTTIDPRVVGLRYNHPNISRSSIWESFIWVVGSSWVLTKGEPYSIYREIITS…	complement 5736..6953				4.00576e-102					IPR010730 (PFAM); PTHR33112:SF9 (PANTHER); PTHR33112 (PANTHER)	no GO terms	no GO terms
	FSUB_39_gene_1.185	hypothetical protein FOPG_17405	MAAGRIPLMNSTNFSSQRGRNEAIKSHVHTAVGFIGSRIQEMPAPGTVCLVDLLTGLPHM	complement 144689..144871				3.97771e-31	C:GO:0005575	C:cellular_component			no IPS match	no IPS match	no IPS match
	FSUB_43_gene_1.85	hypothetical protein FPOA_06538	MPLWLIYHTPDIFRDNESRQALAKDITSVYTNVGLPAFYAIVNFVPMTTGTLWKGGEVPDKPFVRISIDHIAVRLDATAEAYHRCTESIEKALKPHLADKGYDYEYHVDETERKLWRVNGFIPPPFKSSAEKQWASINRPVSYEDDE	104693..105136				1.23175e-83					IPR028116 (PFAM); G3DSA:3.30.429.10 (GENE3D)	no GO terms	no GO terms
	FSUB_65_gene_0.245	uncharacterized protein FMAN_13916	MKTIVQATGYRAPPSTEIDWSSHENSALPDLASRFRFTTHYALCVMDRELWESTSVSLLQKFRGARFWDHPGDFTMMSPSRSSRSNSSMRPAIFNACIPWSDGDIENIDSGEVIGQTDMSNKEITRDYTALREDWTYMPIFWNCHDLAIRLAYIIVRPSRHVIRVLKRLMILLRQACHKEIKWDHTAGNVCVGGWGVAALGGMASVPPLAMVGFGVFMVGWSVGFFGGIAVHVKEKARYEFMNKLEEKFPQLKFLHS	complement 156358..157300				3.56286e-125	C:GO:0005575	C:cellular_component			no IPS match	no IPS match	no IPS match
	FSUB_68_gene_0.60	---NA---	MANRPDRAVATLASISKETIPGDCGGGGGGGVCAGACAAVDECQSGREFGPLKQLISAQPTSKYLMKSLSPPRMSQEMQSRHRGS	144904..145161									no IPS match	no IPS match	no IPS match
	FSUB_72_gene_0.8	hypothetical protein FOVG_00840	LAAFPTEWAESRHRPRATPAAYSLPIEAHFGFSARGPGPHLRTPAAFRNLHSLILPPTLAHSNSLLYTSANTNVPMTADNRKSIRPPYELPLLDWADKCMFQTVTTIHHSCRDASKGLTPFTQSTTPHHNTPPPYRQTISYCPLTLCIIR	100945..101473				6.91693e-06					no IPS match	no IPS match	no IPS match
	FSUB_9_gene_2.37	hypothetical protein FVEG_09779	MADRIESDDQTMSSEEAPRRERRSKKKGSKRRQQAPPQQQQQQQGGSGPLDQLPLAGDLGNTVGGVTDGVTNTLGGVTGGLGGLTGGQQQGGGGDAGKDTLRLRLDLNLDIEIQLKARIHGDLELSLLYVMTPPNLLFNLPVAVVSYLACKSPERDRRRLDDKQRLIIALRCAETRRDSRR	217636..218598				4.12538e-77	C:GO:0005575	C:cellular_component			mobidb-lite (MOBIDB_LITE); PTHR35587:SF5 (PANTHER); PTHR35587 (PANTHER)	no GO terms	no GO terms
	FSUB_9_gene_4.51	carbohydrate esterase family 3	KGIIEFDTKDIFLELTIILETSLTMRRTSEALRLAVFAAFSCGLLRPGLVLGQETDIISSPATSTANAPSRIDFSSAVHLASSISWSLHQLSTIPALPLPTNISAVPEYEIVSRLAPALPPVQAGVSFGPVNDMIAGMIASTNVSSPGLSVVARQSTLRVMIFFNQNGIDVEMVGPYKGTVPPDPPTAPSPPALYGKPVPFSAPKTSGGYAADVDEAFLSNCNHFSAWPVAVDKGLIESVLQSTPADLILFMLGFNDMGWFYSDAAGTLDSVDAFVTNARASNPNVKIAMADVPQRSFIQGRNDLVKNTEIYNKLLPDYISKWSTKQSPIHLVPLAENYDCQPSGCPAGTDGLHPNAEGEFQIASIFSKTLVKDFNLGKDPVQVPGQGDSALARALPQP…	complement 466817..472465				0	F:GO:0004222; P:GO:0006508; F:GO:0008237; C:GO:0016020; C:GO:0016021	F:metalloendopeptidase activity; P:proteolysis; F:metallopeptidase activity; C:membrane; C:integral component of membrane			IPR003961 (SMART); IPR013783 (G3DSA:2.60.40.GENE3D); IPR013783 (G3DSA:2.60.40.GENE3D); IPR013783 (G3DSA:2.60.40.GENE3D); IPR013830 (PFAM); G3DSA:3.40.50.1110 (GENE3D); IPR003961 (PFAM); mobidb-lite (MOBIDB_LITE); mobidb-lite (MOBIDB_LITE); mobidb-lite (MOBIDB_LITE); PTHR30383:SF15 (PANTHER); PTHR30383 (PANTHER); IPR003961 (PROSITE_PROFILES); cd01833 (CDD); IPR003961 (CDD); IPR003961 (CDD); IPR013…	F:GO:0005515	F:protein binding
	1Values indicated after the 'FSUB_' are indicative of the contig number
C	SeqName1	Description	AA sequence	Location	E-value	GO IDs	GO Names	Enzyme Codes	Enzyme Names	InterPro IDs	InterPro GO IDs	InterPro GO Names
	FTEMP_1_gene_20.82	---NA---	MSSMEKDRIESDDQTMSSEEAPRRERRSKKKGSKRRQQAPPQQQQQQQGGSGPLDQLPLAGDLGNTVGGVTDGVTNTLGGVTGGLGGLTGGQQQGGGGDAGKDTLRLRLDLNLDIEIQLKARIHGDLELSLLTG	complement 2011171..2011988						no IPS match	no IPS match	no IPS match
	FTEMP_1_gene_3.65	carbohydrate esterase family 3 protein	MPYRESFGKQAKGQSINQADIEGAPCQLCGIVTAGGAMGRQESTETKFSYLDTLKQKFLAPVFRPNTLVPVSTTGLYGVLYGKLESTNDFALVSSFIQTGFSTLRSRVLITFRIKDSMS	302827..309029	0.0					IPR003961 (SMART); IPR013783 (G3DSA:2.60.40.GENE3D); IPR036514 (G3DSA:3.40.50.GENE3D); IPR013783 (G3DSA:2.60.40.GENE3D); IPR003961 (PFAM); mobidb-lite (MOBIDB_LITE); mobidb-lite (MOBIDB_LITE); mobidb-lite (MOBIDB_LITE); PTHR30383 (PANTHER); PTHR30383:SF5 (PANTHER); IPR003961 (PROSITE_PROFILES); IPR003961 (PROSITE_PROFILES); IPR003961 (PROSITE_PROFILES); IPR003961 (CDD); IPR003961 (CDD); SSF52266 …	F:GO:0005515	F:protein binding
	FTEMP_1_gene_37.52	---NA---	MKRSRILVCPVVTTLLSYGLLLSGVIAGSTTDATPNPTAMNTDDAPGNIAFSSAVHLASSISWSLHQLSTIPALPLPTNITAVPEYEIVSKLAPALPPIQVGVSFGEVDDMIAGMIAATNVSSPDKYIVGRQSTLRVMVVGDSMSQGREGDFTWRYRIWKFFKQNGIDVEMVGPYKGTHLLHLFFMESQSLRVLLKVLAAMRRPLTRHSWRTATIFLHGRAVAVDKGLIQTVLQSTPADLILFMLGFNDMGWFYSDAAGTLDSVNTFVANARAANPKVKIAMADVPQRSFIRGRDDLVKNTEVYNKLLPGYISKWSTKQSPIHLVQLADNYSCQPSGCSAGTDGLHPNAWGEFQIAAAFSKTLVEDFNLGTSPVKIPSQDDSSLARPLQEPSNFRVFSS…	3783731..3784234						no IPS match	no IPS match	no IPS match
	FTEMP_1_gene_47.39	hypothetical protein FVEG_14690	LLPIVPRRAWYFPTEWAESRHRPRATPAAYSLPIEAHFGFSARGPGPHLRTPAAFRNLHSLILPPTLAHSNSLLYTSANTNVPMTADNRKSIRPPYELPLLDWADKCMFQTVTTIPAVMPLRDLHPSHSLPHHTTTHHLTTDKQYHIVHSHSV	4746262..4746633	1.58533E-10					mobidb-lite (MOBIDB_LITE); mobidb-lite (MOBIDB_LITE)	no GO terms	no GO terms
	FTEMP_1_gene_5.47	hypothetical protein FVER53263_09779	MDTLVRTCFLLPEKGNATDCTGLPLTLRPPADGRAPHSFAEHCRGGGGQEMVSMVSSRNVTKTRRIGLAPKWFRNGSRAEAELSSKPVPSIATQPQTTSHSCQATI	complement 562663..563144	1.22168E-84	C:GO:0016021	C:integral component of membrane			mobidb-lite (MOBIDB_LITE); mobidb-lite (MOBIDB_LITE); mobidb-lite (MOBIDB_LITE); PTHR35587 (PANTHER)	no GO terms	no GO terms
	FTEMP_1_gene_58.115	related to C-3 sterol dehydrogenase (C-4 decarboxylase)	MESSKRVLVTGGSGFLGGHVVRQLLNDTGTTVAIVSRHPKMPGDVADESRVSLHAADLTVPSQIEQVFKTFKPHAVIHAASPSYIDTLANLIKANIDGTKALLEAALACADTRAFVFTSSDSAVIPTQEPLSEENSVLYDETNAPNAYAMSKAAAERLVIASNSEQLWTAAIRIPATYGEYDMNFIHEYAAAGYPVALEEVTKIPFFMMQAMASTAEWVYWIMTLGYIKPGMRRTAIDHLDSGCCWSLDKAKRVLGYEPVADQDEAIKKTMEWALKAL	5822025..5826483	2.46757E-113	F:GO:0003854; P:GO:0006694; P:GO:0055114	F:3-beta-hydroxy-delta5-steroid dehydrogenase activity; P:steroid biosynthetic process; P:oxidation-reduction process	EC:1.1.1.145	3-beta-hydroxy-Delta(5)-steroid dehydrogenase	SM00822 (SMART); IPR001509 (PFAM); G3DSA:3.40.50.720 (GENE3D); PTHR10366 (PANTHER); PTHR10366:SF242 (PANTHER); PTHR10366:SF242 (PANTHER); PTHR10366 (PANTHER); IPR036291 (SUPERFAMILY)	F:GO:0003824; F:GO:0050662	F:catalytic activity; F:coenzyme binding
	FTEMP_3_gene_24.5	---NA---	MDSFDGRWVSKVPISGRDCRLQSLINYTIVVLDDDDDDDDDDDDDDDDGAYNQTMAAESLKRALIDESGREH	2423749..2423967						no IPS match	no IPS match	no IPS match
	FTEMP_4_gene_12.56	uncharacterized protein FFB14_13736	MRIVWQWLARFESRIRTRGDFKSYHHLRLRSWEVFKTNIEAHAKPGGSILAQLVLSRNTNQQGRCTSELFPRENTLEALVKKRKACGGDDDRNVSLISGVIVMAAGRIPLMNSTNFSSQRGRNEAIKSHVHTYCCWFHWLPDTGNAGPRYRVSG	complement 1205147..1205683	4.0206E-61					no IPS match	no IPS match	no IPS match
	FTEMP_4_gene_3.104	hypothetical protein FOWG_06521	MDKKGVLVHVTGDTLDRFVLHSTLLRLIDPVRGKPTRSTLDENQDGSFLGAWQLQQKFLDSFALICSTSSSGAKTATAVCLEIHDKIGNLLRLARNHGLTPEDLAGLERVLQVLQEVSRKGMRSFENQMNLTNMASDTEKQSPQAETEILQLVAELDKGRILPIAERIQKRGIHRFLQKTQSGVHYSQLQSERFKVWLENCPFTAAPSRIQNWTCATTVKLIHWASEARWQYAEQLRTLLKLDESQSQPWLDNLHKVARYHSAIKSMVKFAMKEPGIFANIAIRPINAPHQRRFKLPKDEAPLLAIVRTLIGKDTNSTMEKLEKHLGTHDVEARLRRACPPMLTLHAEMQIVVFYESNPGVAPHLRLIGTSKKACFLCDKYLRHHPLRLQASACHQKIY…	complement 334146..335609	0.0					IPR027796 (PFAM); mobidb-lite (MOBIDB_LITE); mobidb-lite (MOBIDB_LITE); PTHR42037 (PANTHER)	no GO terms	no GO terms
	FTEMP_4_gene_41.77	HET-domain-containing protein	LFIPALFVRCIQGALNGCTLFQEFIAILVRQLITRGYDEHNSTSLIDPERWICQLRSCNSHYSDRLQRAQVIWENDPAAETVRPRPFRQTLSSEESRQWVMSRLKACETSHHKCLPQGSNFTPSRLLSLSQCQDGSLSLRLQDMPKGHHRAGASLYTALTYCWGGHQELQLNANTKAALMKGLPISKLPRTLHDAVLETQNLGIKLIWIDCLCIYQDNPQDIALEIAQMPKIYMNSFITISVARANHSNEGFLHDISVPPISETAFRLPFACPDKKLGSVILSKGLANSPIDDRAWTLQEYILSRRVLQYTNAGLHWTCREAVEFRQDDACLALDYLGPFKDSYRMFQGFYESNKGCRNWMNIVEVYTKRELTYALDKLPAISGVAETWAQALDDSYLA…	4148077..4150140	0.0					IPR010730 (PFAM); PTHR33112:SF6 (PANTHER); PTHR33112 (PANTHER)	no GO terms	no GO terms
	FTEMP_4_gene_42.133	uncharacterized protein FPRO_07072	MLDQEVLKSQSQPDDIPSSPATTLSNDNTSDGGSTTSLSKLDRYSDIEEEPADGSGNQGVSMDQTDPASNENAGLTKFTLKSLLLGEELKRLQVWKTSFSNEELDKLPTIDHEVAQSVLKCLTSVASILIDGSSQSFPPSHP	complement 4255607..4256035	4.36156E-78					mobidb-lite (MOBIDB_LITE); mobidb-lite (MOBIDB_LITE); mobidb-lite (MOBIDB_LITE)	no GO terms	no GO terms
	FTEMP_4_gene_7.50	probable CYB2-lactate dehydrogenase cytochrome b2	MRTSTIIASLAAAVSAYEPWLNEPDTGLNTYLASTNWTEGSRPLLKDIRGVPDFDFAARQVLTDQQYAFYRTAAAGEWAYRNNLKVWEKARLRPHQLASVKGLNETLGVTILGHNFSAPIFISPAARAGYGDSDRGELNFVDAAADEDILYVAALYATKTIEEIGAQRKKRGNTIFQQIYSNANLSVTWDAMKRAEDQGVRAFVWTIDAPATSTRHRAARYDTTNANGATSVLSWDLFKEIKSHTKLPIILKGITTTEDALRAVEAGADGIWLSNHGGRQVDYSPSPLEIAYELRRNAPEIFKKTEVIADSGVRYGSDVIKLLALGVKAVGLGRPFMYSNVYGVEGPKKLIQILKTEILADAAQIGITDLHNIPSKVLNTRALERDVYLMDEN	754589..755919	0.0	F:GO:0010181; F:GO:0016491; P:GO:0055114	F:FMN binding; F:oxidoreductase activity; P:oxidation-reduction process			IPR013785 (G3DSA:3.20.20.GENE3D); IPR000262 (PFAM); IPR012133 (PIRSF); PTHR10578 (PANTHER); PTHR10578:SF71 (PANTHER); IPR037396 (PROSITE_PROFILES); SSF51395 (SUPERFAMILY)	F:GO:0003824; F:GO:0010181; F:GO:0016491; P:GO:0055114	F:catalytic activity; F:FMN binding; F:oxidoreductase activity; P:oxidation-reduction process
	FTEMP_5_gene_10.91	---NA---	MDILPVGIGRLTKLNRSLPEERQASPPPRTVLDTPAAKPSGSHHRSINGGATGIAIIRLPMHSVEKV	complement 1041343..1041546						mobidb-lite (MOBIDB_LITE)	no GO terms	no GO terms
	FTEMP_5_gene_13.12	penicillin-binding protein	MDLCSLGLDVELYKTSPYEHWHDRIIQKSRLTGLNTLRPISVAAVYGGYGAIMEECAATFSLKASASTIAKFAGFHGKYHVSAFGIGRRKNGYRRGNFEGARTHVESNGNFDFAVVFNTRDFAFDQEFEYLT	complement 1310175..1310684	8.34276E-65					no IPS match	no IPS match	no IPS match
	FTEMP_5_gene_20.11	hypothetical protein FOXG_19039	MDLMQALLSTFTVQCSTAQEPGSFNPRPPALRQGPLTIDWPPFDLRKSTLYMGPATVRIYV	2049204..2049389	3.59696E-16					no IPS match	no IPS match	no IPS match
	FTEMP_5_gene_43.12	related to myo-inositol transport protein ITR1	MSSLFGRRGVVIAPSFLIFAASVGSACITLNDNAWLVLGSIRLIGGVGMGLKATSTPILAAETAVGSWRGSSVLLWQLWYDNPLPQLGDGVTDESAYSEFENEGYDRTKAATKPRTPVVGAVSHYVLQYWRILKVRRLRNAAITTGIAALSQQLSEINLMAFYGGTTLVGVGPGDHPSDNQISKAMLYNLIFGMALTLMAAAICFDAVNEKVKNEVVAFWIYLFYNPGMGPVPFVLAAESFPLAFRDTEQGASLAISINLLFAGLLAWLQPLLVAGIKFGGTLGVFSGLNVVAFVLILLLMEETSGIPLQSLGLVFNQPKTDLIHFQLKEFLPWLGRFLIGRSSLADRPERTVGLNPKLGASCFDH	4359785..4361450	5.43814E-142	C:GO:0016021; F:GO:0022857; P:GO:0055085	C:integral component of membrane; F:transmembrane transporter activity; P:transmembrane transport			G3DSA:1.20.1250.20 (GENE3D); IPR005828 (PFAM); G3DSA:1.20.1250.20 (GENE3D); PTHR23500 (PANTHER); PTHR23500 (PANTHER); PTHR23500:SF117 (PANTHER); PS51257 (PROSITE_PROFILES); IPR036259 (SUPERFAMILY)	C:GO:0016021; F:GO:0022857; P:GO:0055085	C:integral component of membrane; F:transmembrane transporter activity; P:transmembrane transport
	FTEMP_5_gene_44.124	lysr family regulatory protein	MPSLNTTTLILQKMSTTDIVFPLHEFDDSTINRYMQHWTLRFDAILDTEKLCTALTHLLSLGDWRKLGGRLQFNKVGKLEIHAPRTYSYERPAFQFSEETFSVKTTDHPIAKNLPRAKGKPELFPGITSQFNPLTLGPDWALDFTEHIRRQEPIIGVHIALFSDVTLISIRWVHVVCDFMGIKALVLAWSTSLHGRYDDIPPFMGAYDDPLKNIGSVPPKEPYALADMQLSPQAFKKTYETYLEHVARYPTSVRRMLVLPDNTLQRIKMDFIGGHGSDKLEVIPKGALFNGQFVSDADILAAWAARLCCGVLPVSDRPVHVMGMYEARHCLPETFPQRKDKPDSSPVFIANATFSTSTNTTLQALRQQPLARTALLVRESVATLTKAPQVHAQLHLLRE…	4522389..4523936	0.0					IPR023213 (G3DSA:3.30.559.GENE3D); IPR023213 (G3DSA:3.30.559.GENE3D); PTHR31642 (PANTHER)	no GO terms	no GO terms
	FTEMP_5_gene_8.52	related to sugar transporter	MESTSAMRLPIVIFVALGSLSYGYASSIIATTLGQPTFLSYFALDSRHNANDLMGAINGLFQAGGFLGTLSCYAIADSLGRRKAILAAALISTIGGALQAGSVNIAMFIASRFITGALVTLVPLYQSEMSPSHIRGLLVGIHGGMIGTGYALASYVGLGFYFVKASGAQWRIPLAIQCLPPLLLAVGILFLRETPRWLNRIDEARDSFNYTRLGSRGGPTSDEETTDADFETLRRQTICETEQNITFLDLLKTPSMRKRCITGFLTTFGCQATATIVINNYGPLLYASLGFNTVQQLLIQCGWITVAPFGNFINAFLVDHVGRVKMLLGGFAGCIVALIGECITMSVFEKTNHRGAASGAVFFLFLHVTIFTLCCDATSYVYASEIFPTPVRAKGLSIS…	complement 854214..856056	0.0	P:GO:0008643; C:GO:0016021; F:GO:0022857; P:GO:0055085	P:carbohydrate transport; C:integral component of membrane; F:transmembrane transporter activity; P:transmembrane transport			G3DSA:1.20.1250.20 (GENE3D); IPR005828 (PFAM); PTHR23500 (PANTHER); PTHR23500:SF49 (PANTHER); IPR020846 (PROSITE_PROFILES); IPR020846 (CDD); IPR036259 (SUPERFAMILY)	C:GO:0016021; F:GO:0022857; P:GO:0055085	C:integral component of membrane; F:transmembrane transporter activity; P:transmembrane transport
	FTEMP_6_gene_40.60	related to tol protein	MPVCGPCHDAICDIYPKVEAIYPKRETAVEYPSFDPDAEEKCWICIKYAGFLEEHYPAVYERWLKHELLVTVQVDFVSCRQEAQPRVRHSPSDETLPFDSRGRQNIEVSQLIINRNHRGDEDSDRPIGPYMTLSHRWSNYKYEKLTSRSLSRFRRSIDTSCLPRVFQQAIEITRLLQIRYLWIDSLCIMQDTACGDWEAEALKMGDVYANSFLNLSASYASGEDENPSIFSPESWNHVLPSKLVLKNDKELRSNIFIDADLWKDEVGESPLMERGWVFQERFLAPRVLHFGMRQLAWECNGGGALQMFPTGLPPRFEDNYKKDVCWPMMRPPNALSSEEFCSRWHEIVPAYSACHLTFNTDKLIAFAGIAKLIQSAGSDEYIAGTWKSTIIADLAWWVY…	4072919..4075036	0.0	C:GO:0016020; C:GO:0016021	C:membrane; C:integral component of membrane			IPR010730 (PFAM); PTHR33112 (PANTHER); PTHR33112:SF6 (PANTHER)	no GO terms	no GO terms
	FTEMP_7_gene_0.4	salicylate hydroxylase protein	MSTPKPLKVAIVGGGISGICLAIGLLEQPQLELTIFEASPTFTEIGAGLALGPNAQRALQLLSPEAEAAFWHFATGNSSPEFNKTWFNFRRQAQGHEDGLELGSIENQSGQQTVHRAKFLDALINLVPKDRVQFGKRLLRISDHGAYTVLHFADGTAARTDCVIGADGVHSTVRKYLLGATSPEATPVFSGIVAYRGLIPVEIARHSLGKYASDAYLWCSSEGMVMSYPINSGQVVNVVAACYRESWNEKLYVLNTTLEQMRKDFQSFEGIPQEIIKVYPIAMPSFFDDPRLTFDKLLGKPMIWAMLEHLPAAQYNTKNVAIIGDAAHATTPFQGAGAGQAIEDALILSQLLGRVQCVHEIAPALAAYNTVRRPRTERVIQTSREAMKLYTLSDSAETW…	44494..48383	0.0	F:GO:0005506; C:GO:0016021; F:GO:0016705; F:GO:0020037; P:GO:0055114; F:GO:0071949	F:iron ion binding; C:integral component of membrane; F:oxidoreductase activity, acting on paired donors, with incorporation or reduction of molecular oxygen; F:heme binding; P:oxidation-reduction process; F:FAD binding			PR00420 (PRINTS); IPR006076 (PFAM); IPR002938 (PFAM); IPR036188 (G3DSA:3.50.50.GENE3D); PTHR13789:SF172 (PANTHER); PTHR13789:SF172 (PANTHER); PTHR13789 (PANTHER); IPR036188 (SUPERFAMILY); SSF54373 (SUPERFAMILY); IPR036188 (SUPERFAMILY)	F:GO:0016491; P:GO:0055114; F:GO:0071949	F:oxidoreductase activity; P:oxidation-reduction process; F:FAD binding
	FTEMP_7_gene_0.54	pisatin demethylase	MRWEFLDKQQAALVLALGITSILIHHLFSKYYRLYHIPGPLIAKLTDLHRFFCVRSGFIHLYHAKAHERYGPVVRFGPNMVSSNMYRAFRPWTPDGLLLSVFTANNDEKNRRMKQHIAMYFSLSYVVSTFEKRIDRTINMFLNQLAQQFVATGASCDLTQWFKFFSYDAMGQMTFSRAYGCIEHGNDSIGIISDVKNTMLAIGPMTQVPWLDWLLHKNWLLNSIKPEPVSCLLMYVLKRIAERKNNPTKFHNTVDAGPDLNSDFLGYFIQAQEKESNEVPPRFLSTWTLANILGGSDSTASMLRSVVCFLVENPDALQNVRDELQNKQRDVTGFSLPVPKWNELQNLPFLDACITESLRLDPPFATSLERIVPPGGMTVCGHFLPEGTVVGMNPYTTNR…	49435..51124	0.0	F:GO:0004497; F:GO:0005506; C:GO:0016021; F:GO:0016705; F:GO:0020037; P:GO:0055114; F:GO:0071949	F:monooxygenase activity; F:iron ion binding; C:integral component of membrane; F:oxidoreductase activity, acting on paired donors, with incorporation or reduction of molecular oxygen; F:heme binding; P:oxidation-reduction process; F:FAD binding			IPR001128 (PRINTS); IPR002403 (PRINTS); IPR001128 (PFAM); IPR036396 (G3DSA:1.10.630.GENE3D); PTHR24279 (PANTHER); PTHR24279:SF65 (PANTHER); IPR036396 (SUPERFAMILY)	F:GO:0004497; F:GO:0005506; F:GO:0016705; F:GO:0020037; P:GO:0055114	F:monooxygenase activity; F:iron ion binding; F:oxidoreductase activity, acting on paired donors, with incorporation or reduction of molecular oxygen; F:heme binding; P:oxidation-reduction process
	FTEMP_7_gene_33.90	TPR-like protein	LREHRREGSADEDKTSKTPPQEFPANSSRYSTLATAIMTASTAAQDIDLNSIEQIEMLLQNIQRKPQSYDLAEGALLSTINLSEEKLGKDHSIKIHVAFKLAKFYRVKRKFAMAESALSRVLEDCERVYGESHVITLQTLCELAQTLDNQKDLERCKAVLLQAYTRYRDSNPYGTEALFCGVHLAHTLEALGMYEDAGLLFLDLVEKYRQANTIQNGLGLNCVSSLTSNYCKKAYRLFQGIWKNDDDKKIARGYFFDCVALCQIIASNEGKEAQETLYYNLWPIGKIALWLGDDDTFQNCVWFLDSTKSPNSSRQFRIVCDGCNQQLSSGYHYVCQQCEDHDLCLECFTAQRGQFDTNSESCRDHFFFEISTHHPSTEESEKVGVTTVVEWLSSLLAEA…	complement 3429407..3431288	2.09532E-8	F:GO:0003676; F:GO:0003777; F:GO:0003824; F:GO:0004523; C:GO:0005783; C:GO:0005789; C:GO:0005871; P:GO:0006629; F:GO:0008270; P:GO:0009116; P:GO:0015031; C:GO:0016020; C:GO:0016021; F:GO:0016787; F:GO:0016788; F:GO:0043531; P:GO:0090502	F:nucleic acid binding; F:microtubule motor activity; F:catalytic activity; F:RNA-DNA hybrid ribonuclease activity; C:endoplasmic reticulum; C:endoplasmic reticulum membrane; C:kinesin complex; P:lipid metabolic process; F:zinc ion binding; P:nucleoside metabolic process; P:protein transport; C:membrane; C:integral component of membrane; F:hydrolase activity; F:hydrolase activity, acting on ester…			IPR000433 (SMART); IPR000433 (PFAM); G3DSA:3.30.60.90 (GENE3D); IPR011990 (G3DSA:1.25.40.GENE3D); mobidb-lite (MOBIDB_LITE); mobidb-lite (MOBIDB_LITE); mobidb-lite (MOBIDB_LITE); IPR000433 (PROSITE_PROFILES); SSF57850 (SUPERFAMILY); IPR011990 (SUPERFAMILY)	F:GO:0005515; F:GO:0008270	F:protein binding; F:zinc ion binding
	FTEMP_8_gene_25.87	Phosphatidylserine decarboxylase	MPLATGPGVEEAIAPDEFVKLILCFDGTGNTFSGTNADTNVVKILRKLDRNHKNQFHYYQTGIGTYDVNENSVHKTPIGEVRSRVSKAIDSGFGTTFDAHIMAGYRFLMRYYEPVLNTIIVTGPEFFEVDDPDAMVLIGFPINAVLDWPMGTKSGWAFWYLPEVNQKFQLILHDFETFLASSASKVVLKAPNGWLGPKGQAMIVAKANLDGLTRTFTQIFDSPDPSDPIYLGFESWDQFFTRTFVPDLRPVVQPMNTSILNNSCESGPLQYKKNVKATDFFLLKGQPYSLNNMLNFNESYVKQFANGSVYQAFVSALSYHRWNSPVNGKVVDVFNVPGTYYSESPFQGFPNPDANGPNNSQPYISSVATRGIIYIQAEGPIGLMAIVYVGMAEVSSCQF…	complement 2526745..2528429	0.0	F:GO:0004609; P:GO:0008654	F:phosphatidylserine decarboxylase activity; P:phospholipid biosynthetic process	EC:4.1.1.65	Phosphatidylserine decarboxylase	IPR022237 (PFAM); IPR018712 (PFAM); IPR003817 (PFAM); IPR003817 (PANTHER); PTHR10067:SF9 (PANTHER)	F:GO:0004609; P:GO:0008654	F:phosphatidylserine decarboxylase activity; P:phospholipid biosynthetic process
	FTEMP_8_gene_26.79	amidase	MAEVNWQQLINQKRATREALIPEQWLLPATITSKVTPQSTASAFELLSEAGLLTEREIDITEKYTAVSLTAKIATGELSSYDVATAFCKRAAIVHQLTNSLTEIFFDKALERARWLDEYFSKEGKTVGPLHGLPITLKDMIHVKGQYSTMGFVGHLRHPPADENAVIADMLEAAGAVFYCKTNVPQTLFVCESFNNVFGRTLNPYKLCLSPGGSSAGEAAQLGLCGSIMGVGSDIAGSVRVPAMFTGVYGFRPTVNRLPWSKQAELALKGWQGVQPTLGPMARTAQDLTLFMKTIIQAEPWRYDSTALAIPWHDAPRKDKLTIGVWSQDPHFPVFPPIARTMASAVGRLRAAGHTIKIIEAPPTMKAMKIAMRWFALDQVNLPLKFVQDGAESPIADLD…	complement 2662508..2664374	0.0	F:GO:0004040	F:amidase activity	EC:3.5.1.4	Amidase	IPR036928 (G3DSA:3.90.1300.GENE3D); PIRSF001221 (PIRSF); IPR023631 (PFAM); PTHR11895:SF45 (PANTHER); IPR000120 (PANTHER); IPR036928 (SUPERFAMILY)	F:GO:0004040	F:amidase activity
	FTEMP_8_gene_29.50	Cutinase protein palindrome-binding protein	MCHSPLSTTMPFPSPLSEPIDATIRCTRPRCQQRRASRTRAKSSSTSPPRRSEHDRSRLKCTDRLSECVGHPLGNVTVFQTSAIASALTNETESPHGKCHTDAPCYIPGDHESLHSKLHTDKAMCKPTGLGVSYKKPRPQSHSPKHQHHQRQNLRLWEMKLSQPINNRSCTSCQTENTPRWRQGPAGPRTLCNFCGLIYAKRRQKHADAPSSHCLSSD	complement 2953581..2954283	1.39517E-105	F:GO:0003700; P:GO:0006355; F:GO:0008270; F:GO:0043565	F:DNA-binding transcription factor activity; P:regulation of transcription, DNA-templated; F:zinc ion binding; F:sequence-specific DNA binding			IPR000679 (SMART); IPR000679 (PFAM); IPR013088 (G3DSA:3.30.50.GENE3D); mobidb-lite (MOBIDB_LITE); mobidb-lite (MOBIDB_LITE); IPR039355 (PANTHER); PTHR10071:SF286 (PANTHER); IPR000679 (PROSITE_PROFILES); IPR000679 (CDD); SSF57716 (SUPERFAMILY)	F:GO:0003700; P:GO:0006355; F:GO:0008270; F:GO:0043565	F:DNA-binding transcription factor activity; P:regulation of transcription, DNA-templated; F:zinc ion binding; F:sequence-specific DNA binding
	FTEMP_8_gene_3.96	uncharacterized protein LW93_11983	MDLRALRAQSQHLTASELEEKLKPALSSIQSRKCTRQPSAGYLDFQILEKAQDLVPELCRAFYTYQEGPYNSTSRPSSHFLLEEASWQVKFTFIEKFLRFDCYCNMFYYRTQSLFSISNRVETKLESPLLHHPTNSVERFPRTIISTLFKGYQDLISRLDYSLRSRQPNPGDTPESPNPNISTLQRNEFLDRDMPQEQSYLSHLIMGGYPLFEKLQSLTAEEFEHYTLKEFYQVVTVKLTPVAFYALLTFTHMPLL	387626..388396	7.90971E-82					no IPS match	no IPS match	no IPS match
	FTEMP_8_gene_4.145	uncharacterized protein FPRN_11118	LCSGVRTIELPKMLLLSWPWLLTDGAQFVCRLRQEMSSAIARIIEATESQQVAASPTPTATETSPDGKRETHDLAIENLRVQIDISNSLRGLFEVQHRRQAHREAAAGNASALAHIDANNYPSIPPRVGPSTLPRGIGLADTMSSEDEEEPSDNSESAKAAGKKRAAPGGSGQSATGGKRPRAK	complement 402615..403583	1.08873E-53					mobidb-lite (MOBIDB_LITE); mobidb-lite (MOBIDB_LITE); mobidb-lite (MOBIDB_LITE)	no GO terms	no GO terms
	FTEMP_8_gene_4.70	predicted protein	MASIKTWFIPKDQGREYRRDIAFAHAEIDLRNRLDQNIWETVLDTACRQSETSVWAVGPDTQTDIATLAWNQVNLRKSLSQHIHTATYQEFSTFLHKSLIFYIDPLMSAECALAMLGTVHWASVICDAVPVRFISISHAPYPESLRRLLDHYGHPGITRFTNEDMIKSIERDLKEETEQQIVVCFSPWDWIQDLPWKNNQGFSIRSAKDDSLEDRLKYFDRMPPKNALRSEPKQVERENYEPSVEREGRTMLHFPPDYRHPFPLAEFEQIHLCLTTFREQTIFDPYTEQMARIRLLTSEEERREQVALAFRTSNVPLRVAMYCDQGTIDHFVEFGAFERRLRIHNGHAPGFLLALVCLKDWEIDIEKIISCFFSSDQQYFILRPVRYNLYMQGVTRYIP…	393290..395602	0.0					no IPS match	no IPS match	no IPS match
	FTEMP_9_gene_8.65	predicted protein	LFDQTVRTLWNLTSQPESLRKLRELLMPEEDIVGYFTTPRDNVDSITNALLPEVREVLQSGEFSLRDLTDLRHYSADWPSNQASCIYLRIYIKRNDRPGPYSDTSQADINGNVGMYFGQTRNLRNRLYAYERTMVPGSRSPHMMFALKYVSSHILKMAEQTMILLLRSYQRYLFVPDDAMSSGQVVNSRCAKLLASFQRRAASTTGWPLINGRGLNTASPIFETYRSNCPLLSIPMVPGNPNARCFTSYRIRRTLVYSSGMAQVQLSFHSHYSDTDTRQPAFFSRVKNNTLNAQRPRYGYLVFEIMDDDKPHPRPYMGVPSVGPFKNFNQASSFGVHLEWFNKSSGRWCKVALAKGTYIDLARLARTGDVEACLKPYRDGMMIIQALRGIDYTGPLDGF…	798070..799974	2.4293E-153					mobidb-lite (MOBIDB_LITE); mobidb-lite (MOBIDB_LITE)	no GO terms	no GO terms
	FTEMP_9_gene_9.60	uncharacterized protein FMAN_12390	MPCDSTHTDPVPKGDTPPNTTETKMLESYIHDTSSLQDRLLMRSMAEDNKATGNGAGYSGPKDSKL	947729..947985	2.00157E-37					mobidb-lite (MOBIDB_LITE); mobidb-lite (MOBIDB_LITE)	no GO terms	no GO terms
	FTEMP_10_gene_10.9	related to oxidoreductase	MATQTGIIIEGVNKPHKVVDSILRPSPEGRQVLVRCLAVGLNPIEALQHHTGMMVNEWPAILGSDGAGVVVEVGPDVSRLKVGDYVYSCAPVGQNRFTPFQDAYLAREDLLFKRGNNISLEDSCTIGACLLTTIENMKLTAHQTSSICLLGGAGLELHDDGNRAQEKDEWIVVLGGTGNVGQFAIQLGKVCGYKVLASCSPSNQSIAVRNGASATFDSRETIDAQVAEIKKMTGGNFGKMMDASTYGYKVMVKALETASNAKEKYLTSVDSWSPFSTPSSINEYRADLGHLCRPNERDGTQITSDIANWIPLLEKHIAAGTLKPLEHHVVDGIGWEKVIQGIQHMESGKIGKKIVVRTQEE	complement 1061909..1063218	0.0	F:GO:0016491; P:GO:0055114	F:oxidoreductase activity; P:oxidation-reduction process			IPR020843 (SMART); IPR013154 (PFAM); G3DSA:3.90.180.10 (GENE3D); G3DSA:3.40.50.720 (GENE3D); PTHR43006 (PANTHER); PTHR43006:SF8 (PANTHER); cd08249 (CDD); IPR036291 (SUPERFAMILY); IPR011032 (SUPERFAMILY)	F:GO:0016491; P:GO:0055114	F:oxidoreductase activity; P:oxidation-reduction process
	FTEMP_10_gene_16.21	Phosphoenolpyruvate/pyruvate domain-containing protein	MESNKLARTLKSLHIPSQPLMFINVWDLASLNMVLGLNREASVPVKAIATASWAIAASLGIMDEDLTMYSRM	complement 1648552..1648770	1.98766E-29	F:GO:0016829	F:lyase activity			PF13714 (PFAM); IPR040442 (G3DSA:3.20.20.GENE3D); IPR015813 (SUPERFAMILY)	F:GO:0003824	F:catalytic activity
	FTEMP_10_gene_22.24	hypothetical protein FNYG_12397	MDRELWESTSVSLLQKFRGARFWDHPGDFTMMSPSRSSRSNSSMRPAIFNACIPWSDGDIENIDSGEVIGQTDMSNEEITRDYTALREDWTYMPIFWNCHDLAIRLAYIIVRPSRHVIRVLKRLMILLRQACHKEIKWDHTAGNVCVGGWGVAALGGMASVPPLAMVGFGVFMVGWSVGFFGGIAVHIKEKARYEFMNKLEEKFPQLKFLHS	complement 2222587..2223280	5.64247E-102	C:GO:0016021	C:integral component of membrane			no IPS match	no IPS match	no IPS match
	FTEMP_10_gene_4.5	uncharacterized protein FMAN_13227	MATMLAIVPASHPFQPSGRSVQPKCQYLYQVPLRIFIPVFGPVTYATNSRPNFTKQPPMANRPDTAVATLASISKETIPGDCGGGGGVCAGACAAVDECQSGREFGPLKQLISAQPTSKYLMKILSPPRMSQEMQSRHRDS	414380..414805	1.83224E-7					no IPS match	no IPS match	no IPS match
	FTEMP_10_gene_4.59	ADC synthase	MLSEGHKQKVLAASSLDQVARDSVKLTIKRYIGYRYATHTRGIPYTPGEWASLSLMVPRHQIMIASDKVVVQGQETEAFRHLVDVVVSAHMCNMQRPQSMRVDISQRFPQYTTAVERTLSKVRGGQVMKTIASRAISLPERVDMLATSLVRRESNTPKYLVLSTIPDVNPLELIASLEHGIIITEPLAGTRVCPEDLVERIRFRNELENDPKKIMEHIMSVEDAIAELQYICAHESVEAEDLMSARIRRKVQHLGLRITGALGDSRNCWVTLNVLCPSITALVIPKTDALKVIESLELGSRELYAGGIIMMEPCGGKNGILKSKAHKCRE	483940..485043	1.12998E-151	F:GO:0016833	F:oxo-acid-lyase activity			IPR015890 (PFAM); IPR005801 (G3DSA:3.60.120.GENE3D); PTHR11236:SF17 (PANTHER); PTHR11236 (PANTHER); IPR005801 (SUPERFAMILY)	P:GO:0009058	P:biosynthetic process
	FTEMP_10_gene_5.111	related to VBA1-Vacuolar Basic Amino acid transporter	LTHTIMSDLESSLVVSWLGASYLIATALVQPLSFALGNFTCSIAESLAFLVVGRALSGIGGGILTIMATIVLTDVTRTEARGLWQGINNIVFGFGHGSGGLFGGLVAHRWSWRVAFMSLSVPALLIMLGATLLPEPIRRHNQIADNASAAEESTATGNEDVPLLPKLNSSGRKVDAMGAILLSLGLGSLLASSQQLEFGSSNLDLRLVAFGFVISFIMLTAFSYHSVFMTKDALLPLGLLTKSPSVGYSCLVTFLSQFGFTISEFYLPYYLSLQEHTKMEVVGWCLVPLSVGAAAGSFLAGFLTSRSNTSHLLLGSSAVAFIGTLGVLLTPHKTYALPYQLVSIFLWGLGFGGLATASLVRMLDSTEVNKQASATSLLYTSRSLGGALSLPVASFVFHM…	491304..492844	0.0	C:GO:0016021; P:GO:0055085	C:integral component of membrane; P:transmembrane transport			G3DSA:1.20.1250.20 (GENE3D); G3DSA:1.20.1250.20 (GENE3D); IPR011701 (PFAM); IPR001411 (PANTHER); IPR020846 (PROSITE_PROFILES); IPR020846 (CDD); IPR036259 (SUPERFAMILY)	C:GO:0016021; P:GO:0055085	C:integral component of membrane; P:transmembrane transport
	FTEMP_10_gene_5.23	related to Tryptophanase	MSQVISMPTFTVAAVRQTEQVPRDVRERILRSVQYNVFAFPAALVVADFLSDSGTGAMTTNQWSAIMQGDESYGRNCGYYYFLEAVRDIFERGEHRLNAFQEMRPDLKTNTAFERYLEYQEKGFVNGGLAQMTRPNFFLVPQGRCAESLLFQATAHAFSQPNSQQPIIISNGFFDTTSGNASAAGFRLITFAQEGWMHSQPIQDWQNKNTFKGNMDISAAERFLSNRDQQGRVALIILTITNNFAAGQPVSMENIREVSRLSKEFNIPLIFDACRFAENAMFIKRYESGYKDSPVPEIIREIFSEADGFTISLKKDGLANMGGILCLRDGGKYTTKYQGIGTAIREQQILRYGNDSYGGMSGRDLMAATVGLYEGTKESYLSSRLDQVNRFAEKLAEAR…	complement 488552..490150	0.0	P:GO:0006520; F:GO:0016829	P:cellular amino acid metabolic process; F:lyase activity			IPR001597 (PFAM); PTHR32325 (PANTHER); IPR015424 (SUPERFAMILY)	P:GO:0006520; F:GO:0016829	P:cellular amino acid metabolic process; F:lyase activity
	FTEMP_12_gene_1.18	Vacuolar membrane amino acid uptake transporter fnx2	YGRTSNISGRKPAMIFSYAALTLGCIICGIGTSYWHVLSGRVVSGIGGAGMVALVTVIIAEVMSTLWQLSVDLVVGLLEDGLLIQ	complement 121714..122055	2.25112E-24	F:GO:0003824; C:GO:0016021; P:GO:0055085	F:catalytic activity; C:integral component of membrane; P:transmembrane transport			G3DSA:1.20.1250.20 (GENE3D); IPR020846 (PROSITE_PROFILES); IPR036259 (SUPERFAMILY)	no GO terms	no GO terms
	FTEMP_12_gene_3.0	uncharacterized protein FMAN_15264	MDPASLAIGVIPLVIQLLQTAKSIRDLATVYKSAETQLKSLLNKLDYIETICRSLNELLPWLEDDWPSGENLLSSLYRIISACYEKVSHIHRTLVIIYAKQKPSRNPLKTIGSRFLLHRDQVQACTDELDGLLSLLQLQITSVTLALRITTPQRIVGLSLATIGSPDTSGRTCSEAALDSSGLLRSRRHRSQVTIETWRQCWEGVAFVQRTKEQTKSAILTSPEFSTVQNESTFTLGISLLNWHVKFSMQQGALSPSSFSFQLPRVISTGNRGSIFKRGIELAFVKDNLEKVQELFREGILTPATILSTYDYDPDNETSLLGVGSPFNRQTISLLMRKQLAVLTRASRVLEFLMNQTSDIFTSPSFSYLLYRAEDATQVIEYINLRKDFITPGEFGQIL…	302824..305003	0.0					no IPS match	no IPS match	no IPS match
	FTEMP_12_gene_3.47	hypothetical protein FOQG_19051	MAVLEENIDPNGDTLIIFSYLAVPTQSADEPVPAEEQAAAAELLAVEEPAAVYERDHIDGHSKISSIDWTTHCHEGDESVSELRLKVSKKHLTVASRRARAMFQSDYRETRKTEVDGLYHWEIGPLFDPEAFRIVMKVIHVQAQDLPDEVTLQMIVSIAEIVDDLQCHDALSFFVKVWINRLSESVPSQMCDELVQWIFVTSVFGLDEKFKQATRVAIMCSTGPIDVLGLPMRPDIVGMFTTISPFRNQSLSSALEAVRHFDSPSLYLPSEDISHYSFDHFDSSFQGSKEDVWVLQKDAPSSSRRKKKDRGLFDEEDDDEELNKTPRRLKFHCCRLQAYLKPVIDLLEAKVFTLDIGGF	complement 363187..364539	0.0					no IPS match	no IPS match	no IPS match
	FTEMP_12_gene_3.74	HET-domain-containing protein	MRLLSAKGLFFKEFPGDKIPKYAILSHRWEGEEPSYSDMKTRLAHRDADALGAGPLWTERNYRKIYQFGLMASQAGYEYIWVDTCCIDKSSSAELQESINSMYRWYMESGVCYAYLSDVTISADVVTHKTGSAGSKPWMESFQNSQWFTRGWTLQELLAPRELIFYDKNWHMCGNRVELQDAIQAATGIDGTSLIKASYEEGAYLRSLRSGRLFSWAASRQTTRCEDRAYSLLGMFNVNMPLLYGEKDRAFYRLQEEVIKVNEDVSLLAWNCTEDDDGFAPNGLAKSPSQFRNYQNLITRDSVRVPYVAFSPIMIARGLQATLKIRRDPYEKGLGYAVLVHEMNRRSLVLPLLFCSMTFVRTPIQNECVRFSDPIYVPSRFVNEAKTEPICFIRHTEAA…	complement 346863..348590	0.0					IPR010730 (PFAM); PTHR10622 (PANTHER); PTHR10622:SF10 (PANTHER)	no GO terms	no GO terms
	FTEMP_12_gene_4.36	related to glutamate decarboxylase	MDSKSYQNPELLFEDLPTNALGKGMPALAVKSGIDRLLEHDIEPERNLGSFVSTGLNDIGESLLLENYQRNLACQGEYAGVRRQANLRDEQMSKVLIIHRIHDRCVAILGALWGSSCNEKPTGSAVSGSSEAIFLGILAMKRKWQAENGGIVSPNGSALNIITGSHAHVAVTNAARANDIEIRTVSVGPESNYSFDPSKIQGLLDSSTIGVVLTLGNTYTGHFDPIENTSIVLDNYEQSYGRSIPIHVDAASGGFVAPFNGGKSSRWDFALPRVVSINVSGHKFGLTAAALGWIIWRDRKFLPADLLHESSYLSGHHELPTLRYSQSSSNLLIQYYQLAHLGHQGFEIVIQDLLERSSALGKTLEETGMFTCISESHRTLANTLPVVVFRVNSAVQDQR…	complement 423436..425061	0.0	F:GO:0004351; P:GO:0006536; F:GO:0030170	F:glutamate decarboxylase activity; P:glutamate metabolic process; F:pyridoxal phosphate binding	EC:4.1.1.15	Glutamate decarboxylase	IPR015421 (G3DSA:3.40.640.GENE3D); IPR002129 (PFAM); PTHR43321:SF3 (PANTHER); IPR010107 (PANTHER); IPR015424 (SUPERFAMILY)	F:GO:0003824; F:GO:0004351; P:GO:0006536; F:GO:0016831; P:GO:0019752; F:GO:0030170	F:catalytic activity; F:glutamate decarboxylase activity; P:glutamate metabolic process; F:carboxy-lyase activity; P:carboxylic acid metabolic process; F:pyridoxal phosphate binding
	FTEMP_12_gene_4.41	AM-toxin synthetase (AMT)	MHFTKPDMTTSAESEDGVPWSCSADGPHSSDDHSVVSFHHREASITMENLTQFCKTHDTTPQSVYFTTWSIVLYHMTGQTDVSIDVESHSASALAERPGCETYNMILRSAMTPLELISQYKFPENPSSIEKGTKRSSDSHIKDRHMFKMIQDAGVFQDEHKKFASSSLDYLSYVHLLTESDTATLRIIWRSGLQDLEEITNIFEHTYNCILSQPDASLQSMSSPTLSQLELLPAGPGQGPSLNIPDLLRLTSSTFPSKIAISAWDGDLAYHELQNTSDRWAKALLSHGLTAGDSVIHAFQHSQCAIVAWLAILKAGCTCVPIDVPTPTERLKTIIDSTTCKAAICDSTGSSHLGSTSLSLLTPSDLDGSETKDVIDVAEVSISSTAVIIFTSGSTGQPK…	426236..430043	0.0	F:GO:0003824	F:catalytic activity			G3DSA:3.40.50.12780 (GENE3D); PIRSF001617 (PIRSF); IPR013120 (PFAM); G3DSA:3.30.300.30 (GENE3D); IPR009081 (PFAM); IPR036736 (G3DSA:1.10.1200.GENE3D); G3DSA:3.40.50.720 (GENE3D); IPR000873 (PFAM); G3DSA:3.30.559.30 (GENE3D); mobidb-lite (MOBIDB_LITE); mobidb-lite (MOBIDB_LITE); PTHR44845 (PANTHER); IPR009081 (PROSITE_PROFILES); IPR036291 (SUPERFAMILY); IPR036736 (SUPERFAMILY); SSF52777 (SUPERFAMI…	F:GO:0003824	F:catalytic activity
	FTEMP_12_gene_4.72	---NA---	MAVLTTSGTMFDLGYPSLTAPLKYIFDSIWHEKARFKPAGEQVLMSRPDSSIDMEALEAFPKITPNGA	complement 442665..442871						no IPS match	no IPS match	no IPS match
	FTEMP_12_gene_6.57	predicted protein	MPLWLIYHTSDIFRDNESRQALAKDITSVYTKVGLPAFYAIVNFVPMTTGTLWKGGEVPDKPFVRISIDHIAVRLDATAEAYHRCTESIEKALKPHLADKGYDYEYHVDETERKLWRVNGFIPPPFKSSAEKQWASINRPVSYEDDE	complement 611180..611623	1.04973E-86					IPR014347 (G3DSA:3.30.429.GENE3D); IPR028116 (PFAM)	no GO terms	no GO terms
	FTEMP_12_gene_8.46	uncharacterized protein LW93_10063	MWFPTTADIPKLIDALRKLGVNDSTSDSASTSEVDRALDPSEGLVSGAQAITEDPAFEEWLMDQI	complement 934794..935248	6.82043E-20					mobidb-lite (MOBIDB_LITE)	no GO terms	no GO terms
	FTEMP_12_gene_8.89	related to SKI2-antiviral protein and putative helicase	RKKYQSATAEGILMASTDKKPSEEALLNWYKGLQPLTVDIVGDFAGRELFLIHGEALMQYCLIEARADFDRGFQLLHAIQAVEKFLVNLKNGDCNFDIVFFRDFENVCASEGSAGSKHPYKYKLTRRILIQHLTRGIADFKILEFDSFDSQECRAYLANNAIHFMLCDDGRGVSLDQSVRLRHLIWKVISSGRNVALINSISWKSSKIFMPLLSGSKGMLPDLHIDTPACETKPSAEFSQKVLDETLRLSIKSSDLSAREKFAAVFCRVFLEQSSKEGEISGVDLELVEALLLHMAALRACHLQNRNIHPERFSKHIVDSYDTGFVQLFCTASQNLAENGYAVRGQAEWDLFDLFDGRIFFYILQSIRDGSEFPIPIVDRAKVLSATAFGQRSMNGRSL…	836127..841799	0.0	F:GO:0003676; F:GO:0004386; F:GO:0005524	F:nucleic acid binding; F:helicase activity; F:ATP binding	EC:3.6.1.15	Nucleoside-triphosphate phosphatase	IPR001650 (SMART); IPR014001 (SMART); G3DSA:3.40.50.300 (GENE3D); IPR011545 (PFAM); IPR001650 (PFAM); mobidb-lite (MOBIDB_LITE); mobidb-lite (MOBIDB_LITE); mobidb-lite (MOBIDB_LITE); mobidb-lite (MOBIDB_LITE); PTHR44533:SF2 (PANTHER); PTHR44533 (PANTHER); IPR014001 (PROSITE_PROFILES); IPR001650 (PROSITE_PROFILES); IPR001650 (CDD); cd00046 (CDD); IPR027417 (SUPERFAMILY)	F:GO:0003676; F:GO:0005524	F:nucleic acid binding; F:ATP binding
	1Values indicated after the 'FTEMP_' are indicative of the pseudomolecule (1-12)
	No BLAST result
	Genes containing a HET-domain
	Genes substrate transporters and permeases
	Genes encoding for transcriptional regulators
	Genes involved in metabolism of carbohydrates, fatty acids, amino acids and steroids
	Virulence factors
