# Supplementary material for: Characterization of Host-Specific Genes from Pine- and Grass-Associated Species of the <em>Fusarium Fujikuroi </em>Species Complex
Source: Preprints.org preprint supplement (doi:10.20944/preprints202207.0007.v1), 2022-07-01
Supplement: Supplementary file 6 [file supplementary]

**Table S6.** The Fischer exact test data for (A) the 72 unique pine-associated genes and (B) the 47 unique Poaceae-associated genes.

| A | Representation | GO ID      | GO Name                         | GO Category        |
|---|----------------|------------|---------------------------------|--------------------|
|   | [UNDER]        | GO:0032991 | protein-containing complex      | CELLULAR_COMPONENT |
|   | [UNDER]        | GO:0016021 | integral component of membrane  | CELLULAR_COMPONENT |
|   | [UNDER]        | GO:0031224 | intrinsic component of membrane | CELLULAR_COMPONENT |
|   | [UNDER]        | GO:0044425 | membrane part                   | CELLULAR_COMPONENT |
|   | [UNDER]        | GO:0043170 | macromolecule metabolic process | BIOLOGICAL_PROCESS |

  

| B | Representation | GO ID      | GO Name                                                                                      | GO Category        |
|---|----------------|------------|----------------------------------------------------------------------------------------------|--------------------|
|   | [OVER]         | GO:0004351 | glutamate decarboxylase activity                                                             | MOLECULAR_FUNCTION |
|   | [OVER]         | GO:0005871 | kinesin complex                                                                              | CELLULAR_COMPONENT |
|   | [OVER]         | GO:0006536 | glutamate metabolic process                                                                  | BIOLOGICAL_PROCESS |
|   | [OVER]         | GO:0016833 | oxo-acid-lyase activity                                                                      | MOLECULAR_FUNCTION |
|   | [OVER]         | GO:0033764 | steroid dehydrogenase activity, acting on the CH-OH group of donors, NAD or NADP as acceptor | MOLECULAR_FUNCTION |
|   | [OVER]         | GO:0003854 | 3-beta-hydroxy-delta5-steroid dehydrogenase activity                                         | MOLECULAR_FUNCTION |
|   | [OVER]         | GO:0004523 | RNA-DNA hybrid ribonuclease activity                                                         | MOLECULAR_FUNCTION |
|   | [OVER]         | GO:0016229 | steroid dehydrogenase activity                                                               | MOLECULAR_FUNCTION |
|   | [OVER]         | GO:0005875 | microtubule associated complex                                                               | CELLULAR_COMPONENT |
|   | [UNDER]        | GO:0016830 | carbon-carbon lyase activity                                                                 | MOLECULAR_FUNCTION |
|   | [UNDER]        | GO:0016829 | lyase activity                                                                               | MOLECULAR_FUNCTION |
|   | [UNDER]        | GO:0016740 | transferase activity                                                                         | MOLECULAR_FUNCTION |
|   | [UNDER]        | GO:0005634 | nucleus                                                                                      | CELLULAR_COMPONENT |
|   | [UNDER]        | GO:0043229 | intracellular organelle                                                                      | CELLULAR_COMPONENT |
|   | [UNDER]        | GO:0043226 | organelle                                                                                    | CELLULAR_COMPONENT |
|   | [UNDER]        | GO:0044260 | cellular macromolecule metabolic process                                                     | BIOLOGICAL_PROCESS |

---

|         |            |                    |                    |
|---------|------------|--------------------|--------------------|
| [UNDER] | GO:0044424 | intracellular part | CELLULAR_COMPONENT |
| [UNDER] | GO:0005622 | intracellular      | CELLULAR_COMPONENT |
| [UNDER] | GO:0044464 | cell part          | CELLULAR_COMPONENT |
| [UNDER] | GO:0005623 | cell               | CELLULAR_COMPONENT |
| [UNDER] | GO:0009987 | cellular process   | BIOLOGICAL_PROCESS |

---
