# Supplementary material for: Characterization of Host-Specific Genes from Pine- and Grass-Associated Species of the <em>Fusarium Fujikuroi </em>Species Complex
Source: Preprints.org preprint supplement (doi:10.20944/preprints202207.0007.v1), 2022-07-01
Supplement: Supplementary file 6 [file Table S7.xlsx]

## Sheet: Table S7
Table S7. The EST and RNA-seq data for F. circinatum, obtained from Wingfield et al. [51] and van Wyk et al. [50], respectively.
Name	RPKM Value1	Unique Gene Reads1	Name	RPKM Value2	Unique Gene Reads2
FCIR_1_gene_33.27	29.7445	213	FCIR_1_gene_33.27	12.0613039326	169
FCIR_1_gene_33.28	27.9657	0	FCIR_1_gene_33.28	2.3914608954	0
FCIR_1_gene_40.27	4.99387	19	FCIR_1_gene_40.27	1.7081863539	31
FCIR_1_gene_57.14	1.33842	13	FCIR_1_gene_57.14	0.6458559057	24
FCIR_1_gene_57.52	4.01635	38	FCIR_1_gene_57.52	3.0739782995	116
FCIR_1_gene_57.70	0.342592	1	FCIR_1_gene_57.70	0.0857154443	1
FCIR_1_gene_57.8	6.47707	118	FCIR_1_gene_57.8	0.0656543829	4
FCIR_1_gene_8.74	2.91598	14	FCIR_1_gene_8.74	0.1746654336	4
FCIR_1_gene_9.43	5.09496	14	FCIR_1_gene_9.43	19.3792258312	253
FCIR_2_gene_19.96	1.15334	7	FCIR_2_gene_19.96	0.6562988495	19
FCIR_2_gene_22.10	1.97715	4	FCIR_2_gene_22.10	0.1036261341	1
FCIR_2_gene_38.93	0	0	FCIR_2_gene_38.93	4.9108677711	47
FCIR_2_gene_7.23	2.99199	34	FCIR_2_gene_7.23	0.7973697212	40
FCIR_3_gene_0.73	0.547895	21	FCIR_3_gene_0.73	0.4652804404	76
FCIR_3_gene_2.101	0.206983	1	FCIR_3_gene_2.101	0.7376885423	16
FCIR_3_gene_37.64	12.0873	41	FCIR_3_gene_37.64	0	0
FCIR_3_gene_4.30	9.99766	128	FCIR_3_gene_4.30	6.4626210443	296
FCIR_3_gene_49.72	0.955305	9	FCIR_3_gene_49.72	0	0
FCIR_3_gene_5.72	2.97576	417	FCIR_3_gene_5.72	4.5145065135	1277
FCIR_3_gene_6.47	9.08705	45	FCIR_3_gene_6.47	2.5824390865	61
FCIR_3_gene_6.65	4.92966	39	FCIR_3_gene_6.65	1.5899887756	60
FCIR_4_gene_3.17	0.665673	8	FCIR_4_gene_3.17	12.3098946943	578
FCIR_4_gene_3.38	2.38098	22	FCIR_4_gene_3.38	20.3523759318	895
FCIR_4_gene_39.86	0.643053	2	FCIR_4_gene_39.86	0.0674072911	1
FCIR_4_gene_40.48	3.4384	19	FCIR_4_gene_40.48	0.0758792458	2
FCIR_4_gene_42.78	1.02049	14	FCIR_4_gene_42.78	0.0669200095	4
FCIR_5_gene_0.123	4.70551	79	FCIR_5_gene_0.123	0.0258582905	2
FCIR_5_gene_14.66	0.45644	3	FCIR_5_gene_14.66	0.1827092365	5
FCIR_5_gene_31.37	0	0	FCIR_5_gene_31.37	0	0
FCIR_5_gene_43.57	0.313412	3	FCIR_5_gene_43.57	0.9189199835	27
FCIR_5_gene_43.75	6.0593	174	FCIR_5_gene_43.75	0.1008473328	13
FCIR_6_gene_1.117	0.628146	6	FCIR_6_gene_1.117	0.9785367163	42
FCIR_6_gene_1.32	0.762484	10	FCIR_6_gene_1.32	0.2279774951	11
FCIR_6_gene_2.131	1.59838	38	FCIR_6_gene_2.131	3.9645256359	394
FCIR_6_gene_2.142	0.290219	3	FCIR_6_gene_2.142	0.125098216	6
FCIR_6_gene_2.2	5.23213	89	FCIR_6_gene_2.2	0.0531009636	4
FCIR_6_gene_2.26	2.25231	27	FCIR_6_gene_2.26	0.312042741	16
FCIR_6_gene_2.35	0	0	FCIR_6_gene_2.35	0	0
FCIR_6_gene_36.35	0.0955305	1	FCIR_6_gene_36.35	0.0669738037	3
FCIR_6_gene_40.25	11.9552	232	FCIR_6_gene_40.25	0.1110872158	6
FCIR_6_gene_40.57	1.09478	4	FCIR_6_gene_40.57	0	0
FCIR_7_gene_1.36	0.560605	9	FCIR_7_gene_1.36	0.6769770803	43
FCIR_7_gene_27.82	0.456789	2	FCIR_7_gene_27.82	2.2279618838	43
FCIR_7_gene_3.47	0.450575	2	FCIR_7_gene_3.47	0.1889238364	4
FCIR_7_gene_3.5	1.89078	22	FCIR_7_gene_3.5	0.364140786	14
FCIR_7_gene_3.54	12.9315	41	FCIR_7_gene_3.54	0.0661233427	1
FCIR_7_gene_30.111	0.620948	8	FCIR_7_gene_30.111	10.2272390761	601
FCIR_8_gene_1.117	0.478573	5	FCIR_8_gene_1.117	0	0
FCIR_8_gene_1.139	8.32266	80	FCIR_8_gene_1.139	8.8677294781	387
FCIR_8_gene_22.70	0.104361	1	FCIR_8_gene_22.70	0.0261013195	1
FCIR_8_gene_22.71	3.25023	37	FCIR_8_gene_22.71	0.1466820631	6
FCIR_8_gene_22.81	2.2179	44	FCIR_8_gene_22.81	0.1480086451	11
FCIR_8_gene_22.82	4.29426	103	FCIR_8_gene_22.82	0.7670682393	78
FCIR_8_gene_22.83	0.754223	11	FCIR_8_gene_22.83	0.1102055712	6
FCIR_8_gene_23.0	4.13965	20	FCIR_8_gene_23.0	0.0433934437	1
FCIR_8_gene_25.95	5.94412	21	FCIR_8_gene_25.95	0.1186829229	2
FCIR_8_gene_4.78	1.85383	27	FCIR_8_gene_4.78	0.0599822979	4
FCIR_8_gene_5.67	11.4197	120	FCIR_8_gene_5.67	0.0798040343	4
FCIR_9_gene_21.36	1.53321	5	FCIR_9_gene_21.36	2.3143169956	36
FCIR_9_gene_4.51	1.61097	61	FCIR_9_gene_4.51	1.5560762691	261
FCIR_9_gene_4.6	3.74161	47	FCIR_9_gene_4.6	45.796772855	2743
FCIR_9_gene_7.100	39.5528	379	FCIR_9_gene_7.100	41.6101514617	1748
FCIR_9_gene_9.105	6.94001	19	FCIR_9_gene_9.105	16.8503080128	216
FCIR_10_gene_18.108	9.50188	125	FCIR_10_gene_18.108	2.0138393746	105
FCIR_10_gene_18.30	1.48656	18	FCIR_10_gene_18.30	0.964881406	45
FCIR_10_gene_25.32	3.51989	62	FCIR_10_gene_25.32	0.4400461893	36
FCIR_10_gene_25.58	0.323095	2	FCIR_10_gene_25.58	0	0
FCIR_10_gene_25.61	2.81986	301	FCIR_10_gene_25.61	0.0793480113	2
FCIR_10_gene_5.90	4.63178	20	FCIR_10_gene_5.90	1.2138026201	25
FCIR_11_gene_18.47	2.46327	9	FCIR_11_gene_18.47	2.2951904088	40
FCIR_12_gene_1.3	0	0	FCIR_12_gene_1.3	0.0677361072	1
FCIR_12_gene_1.33	2.47112	39	FCIR_12_gene_1.33	0.4542117468	21
*Highlighted genes indicate which genes comply with the requirements for gene expression; A gene was considered expressed if it had an RPKM (Reads Per Kilobase per Million mapped reads) value ≥ 0.2, and having at least three unique gene reads mapping to it [68].
¹Data obtained from the study performed by Wingfield et al. [51].
²Data obtained from the study performed by Van Wyk et al. [50].
