# Supplementary material for: Characterization of Host-Specific Genes from Pine- and Grass-Associated Species of the <em>Fusarium Fujikuroi </em>Species Complex
Source: Preprints.org preprint supplement (doi:10.20944/preprints202207.0007.v1), 2022-07-01
Supplement: Supplementary file 7 [file supplementary]

**Table S3.** Presence of telomeres at chromosomal ends for the two representative *Fusarium* species examined.

| Chromosome number | <i>F. circinatum</i> |                | <i>F. temperatum</i> |                |
|-------------------|----------------------|----------------|----------------------|----------------|
|                   | B <sup>1</sup>       | E <sup>2</sup> | B <sup>1</sup>       | E <sup>2</sup> |
| 1                 | ✓                    | ✗              | ✓                    | ✓              |
| 2                 | ✗                    | ✓              | ✗                    | ✗              |
| 3                 | ✓                    | ✓              | ✓                    | ✓              |
| 4                 | ✓                    | ✓              | ✓                    | ✓              |
| 5                 | ✗                    | ✓              | ✓                    | ✗              |
| 6                 | ✓                    | ✗              | ✓                    | ✓              |
| 7                 | ✓                    | ✓              | ✓                    | ✓              |
| 8                 | ✓                    | ✗              | ✓                    | ✗              |
| 9                 | ✓                    | ✓              | ✓                    | ✓              |
| 10                | ✓                    | ✓              | ✓                    | ✓              |
| 11                | ✓                    | ✓              | ✓                    | ✓              |
| 12                | ✓                    | ✓              | ✓                    | ✓              |

<sup>1</sup>Beginning of chromosome.

<sup>2</sup>End of chromosome.
