# Supplementary material for: Characterization of Host-Specific Genes from Pine- and Grass-Associated Species of the <em>Fusarium Fujikuroi </em>Species Complex
Source: Preprints.org preprint supplement (doi:10.20944/preprints202207.0007.v1), 2022-07-01
Supplement: Supplementary file 7 [file Table S8.xlsx]

## Sheet: Table S8
Table S8. The placement of host-associated genes in groups that infer their evolutionary origins.
Group number	Description	Genes in this group
Group 1	Origin within the FFSC	FCIR_1_gene_57.14; FCIR_1_gene_57.52; FCIR_1_gene_57.70; FCIR_2_gene_19.96; FCIR_3_gene_6.65; FCIR_3_gene_4.30; FCIR_3_gene_2.101; FCIR_3_gene_6.47; FCIR_3_gene_37.64; FCIR_3_gene_49.72; FCIR_4_gene_40.48; FCIR_4_gene_39.86; FCIR_5_gene_14.66; FCIR_5_gene_43.57; FCIR_7_gene_3.5; FCIR_7_gene_30.111; FCIR_8_gene_25.95; FCIR_8_gene_23.0; FCIR_10_gene_5.90; FCIR_10_gene_25.61; FCIR_11_gene_18.47; FTE…
Group 2	Origin within the FFSC+FOSC	FCIR_4_gene_3.17; FCIR_3_gene_1.32; FCIR_6_gene_1.117; FCIR_8_gene_1.139; FCIR_8_gene_22.70; FCIR_10_gene_18.108; FTEMP_1_gene_5.47; FTEMP_9_gene_9.60; FTEMP_12_gene_3.47
Group 3	Origin within the broader Fusarium outside the FFSC and FOSC	FCIR_2_gene_7.23; FCIR_8_gene_22.71; FTEMP_4_gene_3.104; FTEMP_7_gene_0.4
Group 4	Origin with less than 10 hits and mostly Fusarium	FCIR_1_gene_8.74; FCIR_1_gene_57.8; FCIR_2_gene_22.10; FCIR_6_gene_40.25; FCIR_6_gene_40.57; FCIR_7_gene_3.47; FCIR_7_gene_3.54; FCIR_9_gene_4.6; FCIR_10_gene_25.32; FCIR_12_gene_1.3; FTEMP_4_gene_12.56; FTEMP_6_gene_40.60; FTEMP_8_gene_4.70; FTEMP_9_gene_8.65; FTEMP_10_gene_5.111; FTEMP_12_gene_3.0; FTEMP_12_gene_8.46
Group 5	Origin with less than 10 hits and mostly not Fusarium	FCIR_6_gene_2.131; FCIR_6_gene_2.26; FTEMP_12_gene_3.74
Group 6	Origin outside Fusarium in the Ascomycetes	FCIR_4_gene_3.38; FCIR_5_gene_0.123; FCIR_6_gene_36.35; FCIR_7_gene_1.36; FCIR_8_gene_1.117; FCIR_8_gene_4.78; FCIR_8_gene_22.83; FCIR_10_gene_25.58; FCIR_12_gene_1.33; FTEMP_4_gene_41.77; FTEMP_5_gene_8.52; FTEMP_8_gene_25.87; FTEMP_8_gene_26.79; FTEMP_12_gene_4.36
Group 7	Origin outside Fungi	FCIR_6_gene_2.142; FTEMP_10_gene_5.23
Group 8	Origin unknown; no significant BLAST hit in the NCBI database	FCIR_1_gene_33.27; FCIR_1_gene_33.28; FCIR_1_gene_40.27; FCIR_1_gene_9.43; FCIR_10_gene_18.30; FCIR_2_gene_38.93; FCIR_3_gene_0.73; FCIR_3_gene_5.72; FCIR_4_gene_42.78; FCIR_5_gene_31.37; FCIR_5_gene_43.75; FCIR_6_gene_2.2; FCIR_6_gene_40.2; FCIR_7_gene_27.82; FCIR_8_gene_22.81; FCIR_8_gene_22.82; FCIR_8_gene_5.67; FCIR_9_gene_21.36; FCIR_9_gene_4.51; FCIR_9_gene_7.100; FCIR_9_gene_9.105; FTEMP_1…

## Sheet: Sheet2
group 1	FCIR_	1	_gene_	7.23
	FCIR_	1	_gene_	22.71
	FTEMP_	4	_gene_	3.104
	FTEMP_	7	_gene_	0.4
group 2	FCIR_	1	_gene_	57.14
	FCIR_	1	_gene_	57.52
	FCIR_	1	_gene_	57.70
	FCIR_	2	_gene_	19.96
	FCIR_	3	_gene_	6.65
	FCIR_	3	_gene_	4.30
	FCIR_	3	_gene_	2.101
	FCIR_	3	_gene_	6.47
	FCIR_	3	_gene_	37.64
	FCIR_	3	_gene_	49.72
	FCIR_	4	_gene_	40.48
	FCIR_	4	_gene_	39.86
	FCIR_	5	_gene_	14.66
	FCIR_	5	_gene_	43.57
	FCIR_	7	_gene_	3.5
	FCIR_	7	_gene_	30.111
	FCIR_	8	_gene_	25.95
	FCIR_	8	_gene_	23.0
	FCIR_	10	_gene_	5.90
	FCIR_	10	_gene_	25.61
	FCIR_	11	_gene_	18.47
	FTEMP_	1	_gene_	58.115
	FTEMP_	4	_gene_	42.133
	FTEMP_	5	_gene_	13.12
	FTEMP_	5	_gene_	43.12
	FTEMP_	8	_gene_	4.145
	FTEMP_	8	_gene_	3.96
	FTEMP_	8	_gene_	29.50
	FTEMP_	10	_gene_	4.59
	FTEMP_	10	_gene_	10.9
	FTEMP_	10	_gene_	16.21
	FTEMP_	10	_gene_	22.24
	FTEMP_	12	_gene_	1.18
	FTEMP_	12	_gene_	6.57
group 3	FCIR_	4	_gene_	3.17
	FCIR_	3	_gene_	1.32
	FCIR_	6	_gene_	1.117
	FCIR_	8	_gene_	1.139
	FCIR_	8	_gene_	22.70
	FCIR_	10	_gene_	18.108
	FTEMP_	1	_gene_	5.47
	FTEMP_	9	_gene_	9.60
	FTEMP_	12	_gene_	3.47
group 4	FCIR_	1	_gene_	8.74
	FCIR_	1	_gene_	57.8
	FCIR_	2	_gene_	22.10
	FCIR_	6	_gene_	40.25
	FCIR_	6	_gene_	40.57
	FCIR_	7	_gene_	3.47
	FCIR_	7	_gene_	3.54
	FCIR_	9	_gene_	4.6
	FCIR_	10	_gene_	25.32
	FCIR_	12	_gene_	1.3
	FTEMP_	4	_gene_	12.56
	FTEMP_	6	_gene_	40.60
	FTEMP_	8	_gene_	4.70
	FTEMP_	9	_gene_	8.65
	FTEMP_	10	_gene_	5.111
	FTEMP_	12	_gene_	3.0
	FTEMP_	12	_gene_	8.46
group 5	FCIR_	6	_gene_	2.131
	FCIR_	6	_gene_	2.26
	FTEMP_	12	_gene_	3.74
group 6	FCIR_	6	_gene_	2.142
	FTEMP_	10	_gene_	5.23
group 7	FCIR_	4	_gene_	3.38
	FCIR_	5	_gene_	0.123
	FCIR_	6	_gene_	36.35
	FCIR_	7	_gene_	1.36
	FCIR_	8	_gene_	1.117
	FCIR_	8	_gene_	4.78
	FCIR_	8	_gene_	22.83
	FCIR_	10	_gene_	25.58
	FCIR_	12	_gene_	1.33
	FTEMP_	4	_gene_	41.77
	FTEMP_	5	_gene_	8.52
	FTEMP_	8	_gene_	25.87
	FTEMP_	8	_gene_	26.79
	FTEMP_	12	_gene_	4.36
