# Supplementary material for: Characterization of Host-Specific Genes from Pine- and Grass-Associated Species of the <em>Fusarium Fujikuroi </em>Species Complex
Source: Preprints.org preprint supplement (doi:10.20944/preprints202207.0007.v1), 2022-07-01
Supplement: Supplementary file 8 [file supplementary]

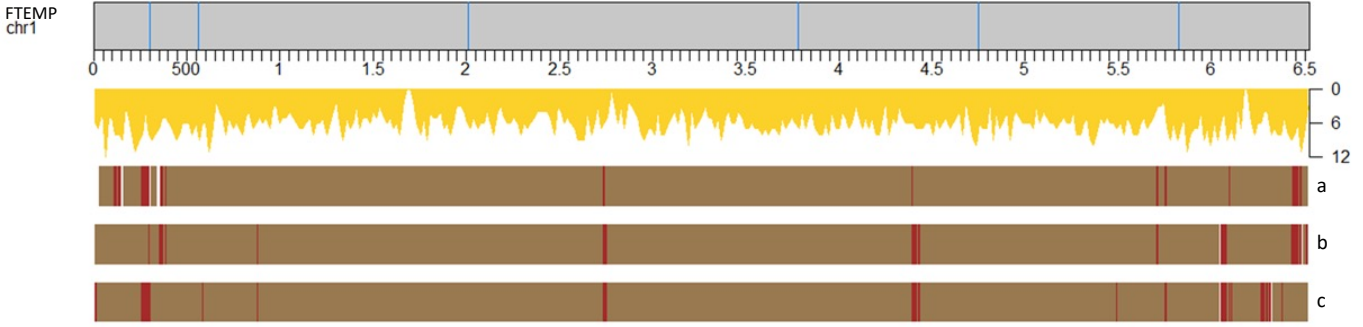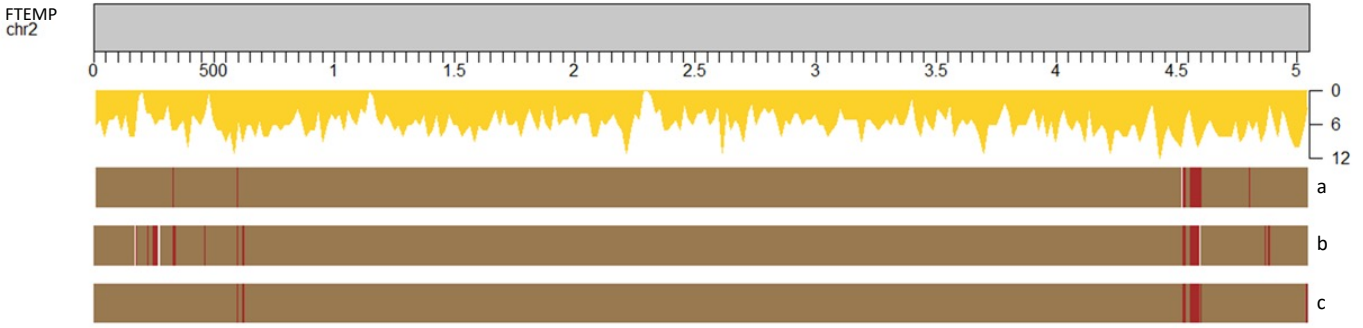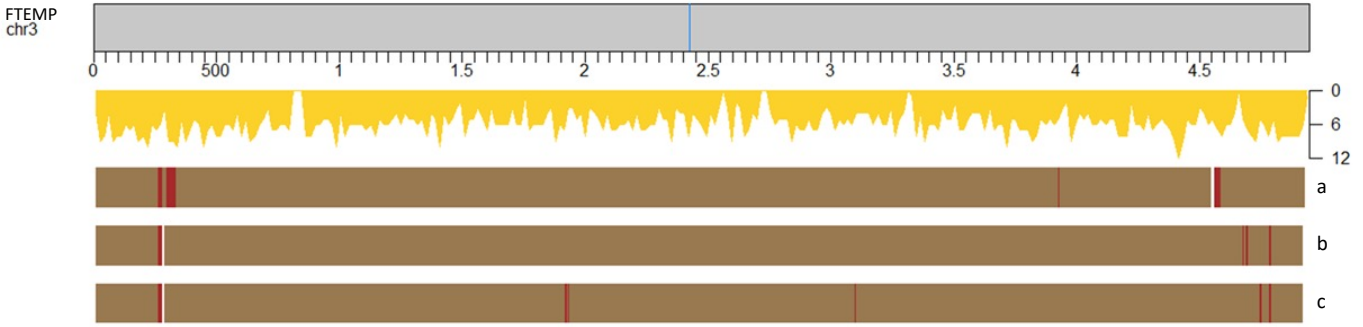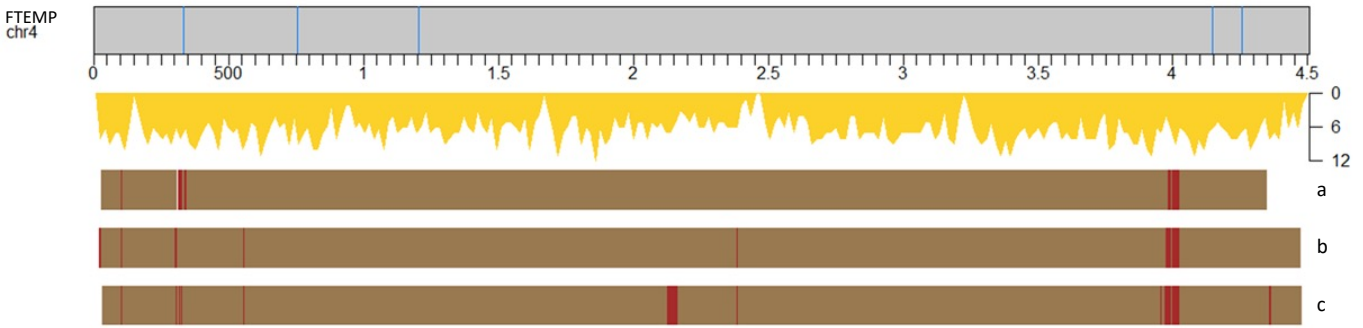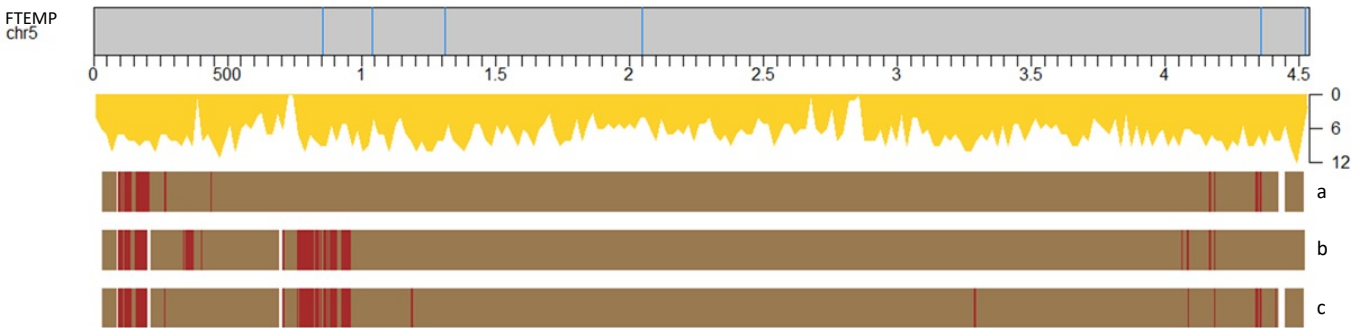

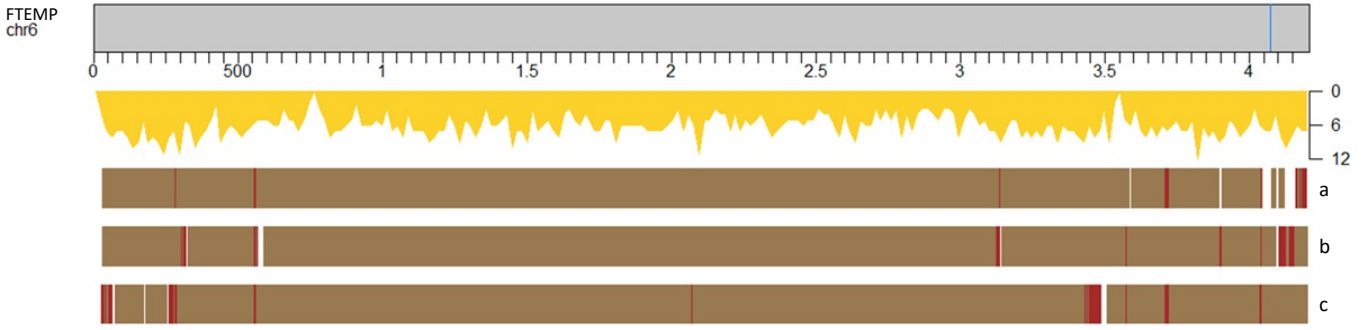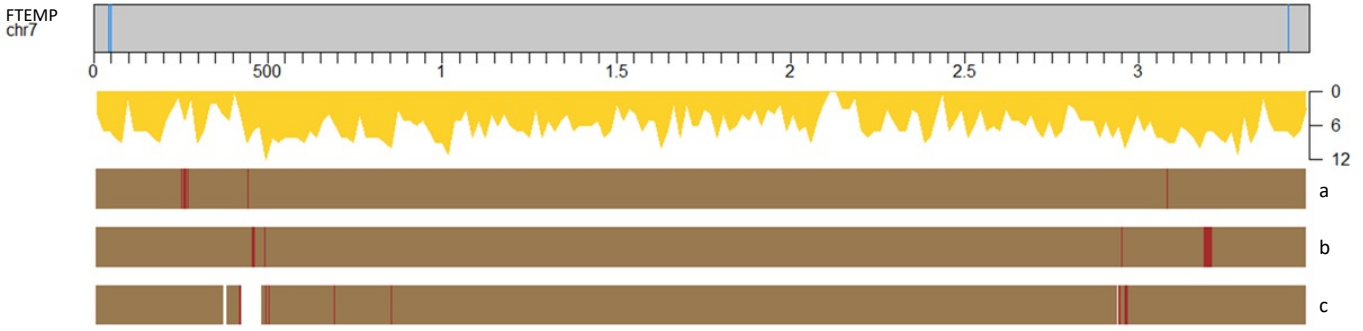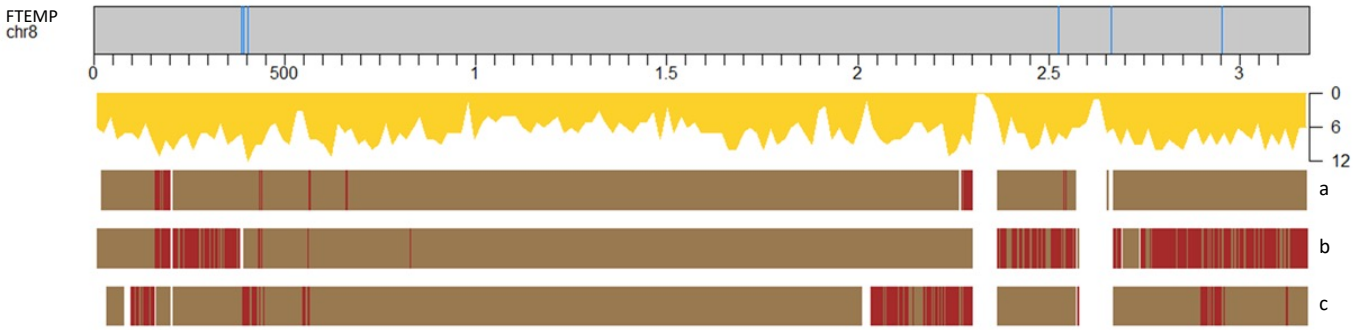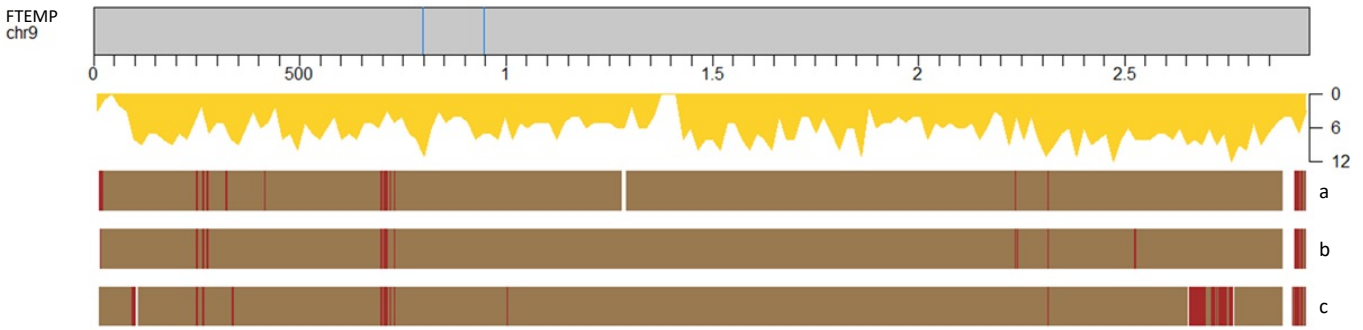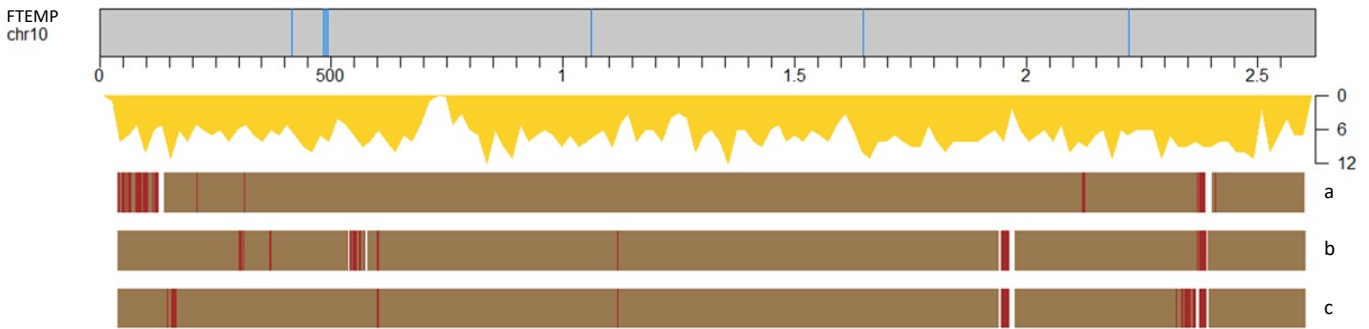

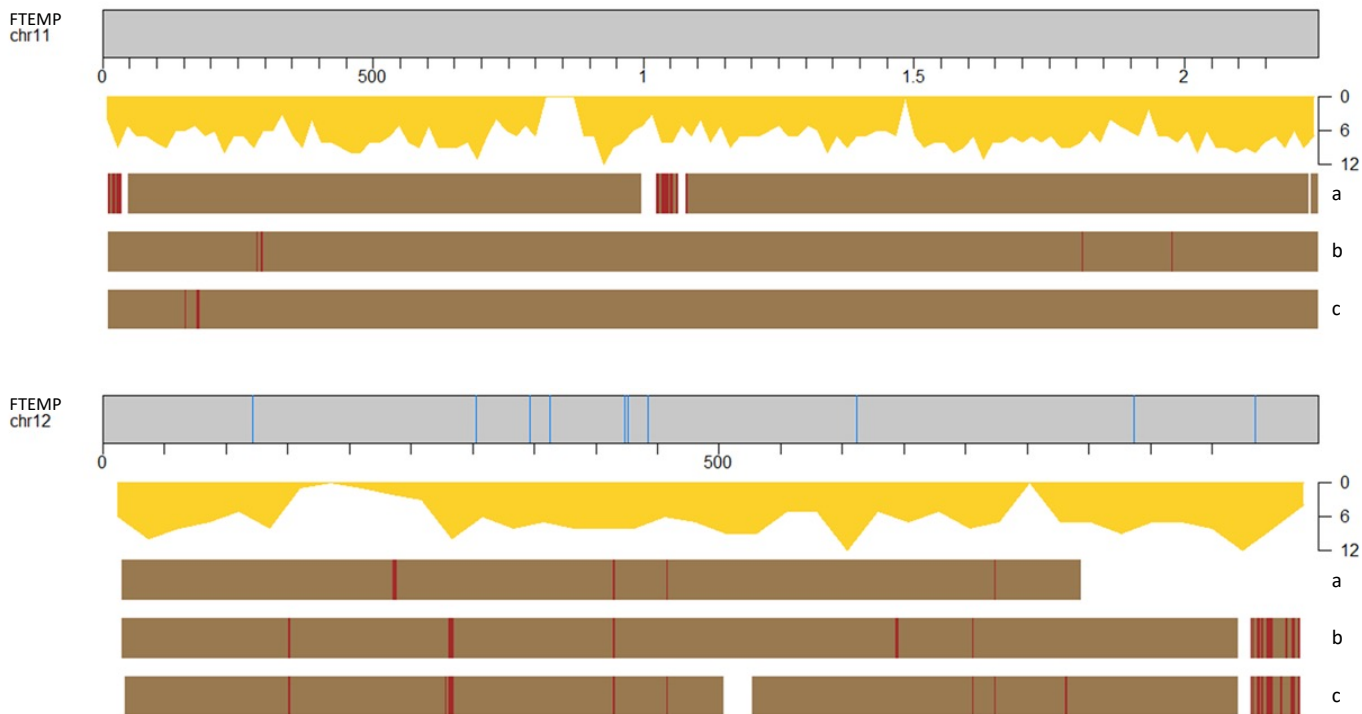

■ Unique genes

■ Gene density

■ Inversions

**a** Synteny between *F. temperatum* CMW 40964 and *F. circinatum* FSP34

**b** Synteny between *F. temperatum* CMW 40964 and *F. fracticaudum* CMW 25245

**c** Synteny between *F. temperatum* CMW 40964 and *F. pininemorale* CMW 25243

**Figure S10.** The distribution of Poaceae-host-associated genes and conservation of synteny across and between chromosomes and genomes. Poaceae-host-associated genes distribution across each of the chromosomes as indicated by the blue lines. The conservation of synteny and inversion between the relevant genomes are indicated in the brown blocks and red lines. FTEMP = *F. temperatum*; chromosome size is given in kbp.
