# Supplementary material for: Characterization of Host-Specific Genes from Pine- and Grass-Associated Species of the <em>Fusarium Fujikuroi </em>Species Complex
Source: Preprints.org preprint supplement (doi:10.20944/preprints202207.0007.v1), 2022-07-01
Supplement: Supplementary file 8 [file Table S9.xlsx]

## Sheet: Table S9
Table S9. The gene information for the unique F. circinatum genes, in terms of chromosome location, subtelomeric placement, ancestral origin and BLAST description.
Chromosome	Number of genes in subtolemeric regions and gene information
	Fusarium circinatum	Gene name(s)	Ancestral origin group	BLAST description*
1	0	-	-	-
2	0	-	-	-
3	5	FCIR_3_gene_0.73	8	Virulence factor
		FCIR_3_gene_5.72	5	Hypothetical protein
		FCIR_3_gene_4.30	1	Virulence factor
		FCIR_3_gene_2.101	1	Virulence factor
		FCIR_3_gene_49.72	1	Uncharacterized
4	5	FCIR_4_gene_3.17	2	Metabolism
		FCIR_4_gene_3.38	6	Virulence factor
		FCIR_4_gene_39.86	1	Hypothetical protein
		FCIR_4_gene_40.48	1	Hypothetical protein
		FCIR_4_gene_42.78	8	Metabolism
5	3	FCIR_5_gene_0.123	6	Metabolism
		FCIR_5_gene_43.57	1	Virulence factor
		FCIR_5_gene_43.75	8	Virulence factor
6	9	FCIR_6_gene_1.32	2	Metabolism
		FCIR_6_gene_2.131	5	Transcriptional activator
		FCIR_6_gene_2.142	7	Virulence factor
		FCIR_6_gene_2.2	8	Major facillitator superfamily transporters
		FCIR_6_gene_2.26	5	Metabolism
		FCIR_6_gene_2.35	8	Virulence factor
		FCIR_6_gene_40.25	4	Hypothetical protein
		FCIR_6_gene_40.57	4	No hit
		FCIR_6_gene_1.117	2	Virulence factor
7	5	FCIR_7_gene_1.36	6	Transcriptional activator
		FCIR_7_gene_3.47	4	No hit
		FCIR_7_gene_3.5	1	Hypothetical protein
		FCIR_7_gene_3.54	4	Hypothetical protein
		FCIR_7_gene_30.111	1	Virulence factor
8	3	FCIR_8_gene_1.117	6	Virulence factor
		FCIR_8_gene_1.139	2	Virulence factor
		FCIR_8_gene_4.78	6	Major facillitator superfamily transporters
9	2	FCIR_9_gene_4.51	8	Hypothetical protein
		FCIR_9_gene_4.6	4	Hypothetical protein
10	3	FCIR_10_gene_25.32	4	Transcriptional activator
		FCIR_10_gene_25.58	6	Predicted
		FCIR_10_gene_25.61	1	Metabolism
11	1	FCIR_11_gene_18.47	1	Virulence factor
12	2	FCIR_12_gene_1.3	4	Metabolism
		FCIR_12_gene_1.33	6	Virulence factor
*GO terms information obtained from Table S4
