# Supplementary material for: Characterization of Host-Specific Genes from Pine- and Grass-Associated Species of the <em>Fusarium Fujikuroi </em>Species Complex
Source: Preprints.org preprint supplement (doi:10.20944/preprints202207.0007.v1), 2022-07-01
Supplement: Supplementary file 12 [file supplementary]

**Table S2.** The size difference between the chromosomes of four of the six *Fusarium* species.

| <i>F. circinatum</i> |           |      | <i>F. fracticaudum</i> |           |      | <i>F. pininemorale</i> |           |      | <i>F. temperatum</i> |           |      |
|----------------------|-----------|------|------------------------|-----------|------|------------------------|-----------|------|----------------------|-----------|------|
| Chromosome           | Size (bp) | Fold | Chromosome             | Size (bp) | Fold | Chromosome             | Size (bp) | Fold | Chromosome           | Size (bp) | Fold |
| 1                    | 6407589   | 1.06 | 1                      | 6653466   | 1.02 | 1                      | 6794846   |      | 1                    | 6525753   | 1.04 |
| 2                    | 5065897   |      | 2                      | 4953649   | 1.02 | 2                      | 5063039   | 1.00 | 2                    | 5052385   | 1.00 |
| 3                    | 5081688   | 1.03 | 3                      | 4904252   | 1.06 | 3                      | 5216703   |      | 3                    | 4947561   | 1.05 |
| 4                    | 4313068   | 1.10 | 4                      | 4491441   | 1.05 | 4                      | 4724792   |      | 4                    | 4506647   | 1.05 |
| 5                    | 4432453   | 1.09 | 5                      | 4819172   |      | 5                      | 4772958   | 1.01 | 5                    | 4540351   | 1.06 |
| 6                    | 4301695   | 1.08 | 6                      | 4410177   | 1.05 | 6                      | 4635304   |      | 6                    | 4208847   | 1.10 |
| 7                    | 3540654   | 1.02 | 7                      | 3414008   | 1.06 | 7                      | 3613395   |      | 7                    | 3489342   | 1.04 |
| 8                    | 3172515   | 1.05 | 8                      | 3143385   | 1.06 | 8                      | 3329509   |      | 8                    | 3182830   | 1.05 |
| 9                    | 2981544   | 1.03 | 9                      | 2954973   | 1.04 | 9                      | 3078815   |      | 9                    | 2948229   | 1.04 |
| 10                   | 2698620   | 1.02 | 10                     | 2584499   | 1.06 | 10                     | 2751664   |      | 10                   | 2624843   | 1.05 |
| 11                   | 2228220   | 1.07 | 11                     | 2294545   | 1.04 | 11                     | 2391144   |      | 11                   | 2247932   | 1.06 |
| 12                   | 525065    | 2.08 | 12                     | 1094708   |      | 12                     | 968722    | 1.13 | 12                   | 986231    | 1.11 |

\*Indicated in red is the chromosome which has the largest size amongst the four investigated *Fusarium* species.
