# Supplementary material for: Characterization of Host-Specific Genes from Pine- and Grass-Associated Species of the <em>Fusarium Fujikuroi </em>Species Complex
Source: Preprints.org preprint supplement (doi:10.20944/preprints202207.0007.v1), 2022-07-01
Supplement: Supplementary file 13 [file supplementary]

**Table S1.** BUSCO results for the relevant *Fusarium* genomes.

| <b>Species</b>         | <b>Total<br/>BUSCOs</b> | <b>Complete<br/>BUSCOs</b> | <b>Complete and<br/>single-copy<br/>BUSCOs</b> | <b>Complete and<br/>duplicated<br/>BUSCOs</b> | <b>Fragmented<br/>BUSCOs</b> | <b>Missing<br/>BUSCOs</b> |
|------------------------|-------------------------|----------------------------|------------------------------------------------|-----------------------------------------------|------------------------------|---------------------------|
| <i>F. circinatum</i>   | 3 725                   | 3 624 (97.3%)              | 3 616 (97.1%)                                  | 8 (0.2%)                                      | 75 (2.0%)                    | 26 (0.7%)                 |
| <i>F. fracticaudum</i> | 3 725                   | 3 681 (98.8%)              | 3 670 (98.5%)                                  | 11 (0.3%)                                     | 29 (0.8%)                    | 15 (0.4%)                 |
| <i>F. pininemorale</i> | 3 725                   | 3 688 (99.1%)              | 3 671 (98.6%)                                  | 17 (0.5%)                                     | 23 (0.6%)                    | 14 (0.3%)                 |
| <i>F. konzum</i>       | 3 725                   | 3 635 (97.6%)              | 3 625 (97.3%)                                  | 10 (0.3%)                                     | 66 (1.8%)                    | 24 (0.6%)                 |
| <i>F. subglutinans</i> | 3 725                   | 3 677 (98.7%)              | 3 667 (98.4%)                                  | 10 (0.3%)                                     | 32 (0.9%)                    | 16 (0.4%)                 |
| <i>F. temperatum</i>   | 3 725                   | 3 681 (98.8%)              | 3 673 (98.6%)                                  | 8 (0.2%)                                      | 29 (0.8%)                    | 15 (0.4%)                 |
