# Supplementary material for: Characterization of Host-Specific Genes from Pine- and Grass-Associated Species of the <em>Fusarium Fujikuroi </em>Species Complex
Source: Preprints.org preprint supplement (doi:10.20944/preprints202207.0007.v1), 2022-07-01

**Figure S8.** Host-range-associated genes with ancestral origins outside Fungi. Host-range-associated genes investigated are highlighted in yellow; FCIR = *Fusarium circinatum* and FTEMP = *Fusarium temperatum*.

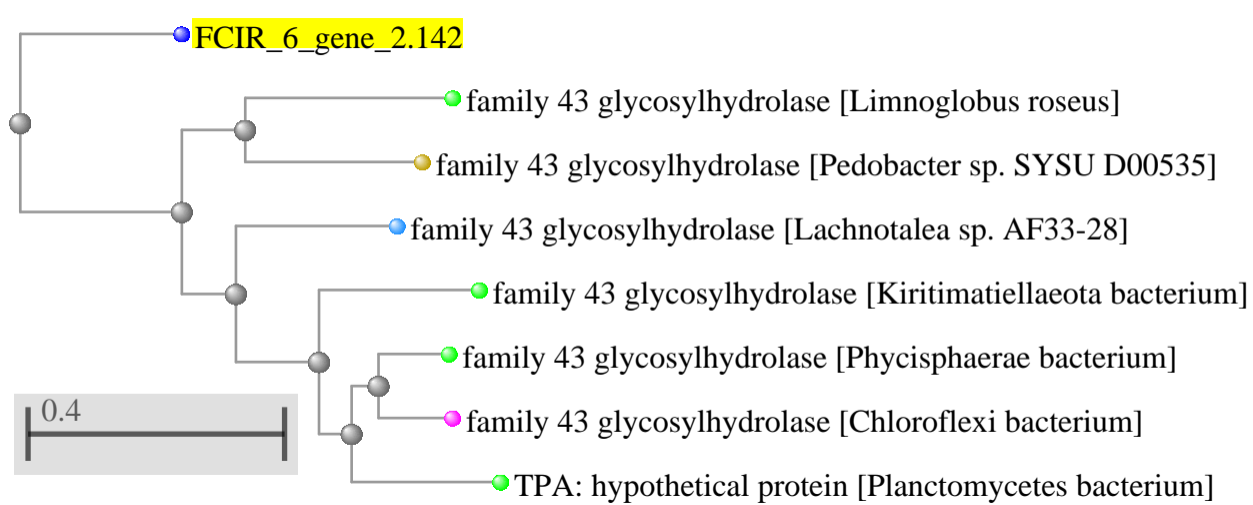

FTEMP\_10\_gene\_5.23

tryptophanase [Microdochium bolleyi]

putative beta-eliminating lyase [Madurella mycetomatis]

Tryptophanase [Colletotrichum tropicale]

tryptophanase [Candidatus Lokiarchaeota archaeon]

TPA: tryptophanase [Sediminispirochaeta sp.]

tryptophanase [Candidatus Lokiarchaeota archaeon]

tryptophanase [Candidatus Lokiarchaeota archaeon Loki\_b32]

tryptophanase [Candidatus Lokiarchaeota archaeon]

tryptophanase [Candidatus Lokiarchaeota archaeon Loki\_b31]

tryptophanase [Candidatus Lokiarchaeota archaeon]

tryptophanase [Candidatus Lokiarchaeota archaeon]

tryptophanase [Candidatus Lokiarchaeota archaeon]

Tryptophanase [Candidatus Heimdallarchaeota archaeon LC\_3]

tryptophanase [Candidatus Bathyarchaeota archaeon]

tryptophanase [Candidatus Bathyarchaeota archaeon]

tryptophanase [Nanoarchaeota archaeon]

tryptophanase [archaeon]

tryptophanase [Candidatus Riflebacteria bacterium]

tryptophanase [Blastocystis sp. subtype 4]

uncharacterized protein [Blastocystis hominis]

tryptophanase [Blastocystis sp. ATCC 50177/Nand II]

0.1

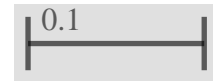

Supplement: Supplementary file 14 [file supplementary]
